# Supplementary material for: Transcription termination and antitermination of bacterial CRISPR arrays
Source: eLife journal article supplement (doi:10.7554/elife.58182), 2020-10-30
Supplement: supp [file elife-58182-supp-v1.zip]

Archive with 16 entries (16 files):
- elife_poa_e58182_Figure_1_figure_supplement_1.tif
- elife_poa_e58182_Figure_3_figure_supplement_1.tif
- elife_poa_e58182_Figure_4_figure_supplement_1.tif
- elife_poa_e58182_Figure_4_figure_supplement_2.tif
- elife_poa_e58182_Figure_6_figure_supplement_1.docx
- elife_poa_e58182_Figure_7_figure_supplement_1.tif
- elife_poa_e58182_Figure_7_figure_supplement_2.tif
- elife_poa_e58182_Transparent_Reporting_File.pdf
- elife_poa_e58182_Supplementary_file_1.xlsx
- elife_poa_e58182_Supplementary_file_2.xlsx
- elife_poa_e58182_Supplementary_file_3.xlsx
- elife_poa_e58182_Supplementary_file_4.xlsx
- elife_poa_e58182_Supplementary_file_5.xlsx
- elife_poa_e58182_Supplementary_file_6.xlsx
- elife_poa_e58182_Supplementary_file_7.xlsx
- elife_poa_e58182_Supplementary_file_8.py
