# Supplementary material for: Transcription termination and antitermination of bacterial CRISPR arrays
Source: eLife journal article supplement (doi:10.7554/elife.58182), 2020-10-30
Supplement: supp [file elife-58182-supp-v1.zip › elife_poa_e58182_Supplementary_file_1.xlsx]

## Sheet: Sheet1
	Supplementary file 1. List of FLAG3-Cas5 ChIP-seq peaks
	Genome Coordinate	FAT Score (relative ChIP-seq occupancy)
	28607	1
	28625	1
	28640	1
	37111	7
	67709	1
	67725	1
	74673	4
	78291	1
	81566	4
	85305	1
	113276	1
	113279	1
	113297	1
	113300	1
	113318	1
	114994	4
	134574	1
	134582	1
	134591	1
	136071	3
	137574	1
	162128	1
	166936	7
	171782	1
	188865	1
	188891	1
	188906	1
	254925	3
	259665	2
	260310	1
	270915	2
	283324	2
	284921	2
	292687	4
	316370	6
	331551	1
	354515	17
	354530	18
	354533	17
	354547	18
	360775	23
	360820	27
	385713	2
	391415	1
	444929	1
	461725	3
	503420	2
	510543	1
	530681	2
	533629	1
	547472	2
	565917	2
	608635	1
	648400	4
	658869	1
	658876	1
	704129	1
	781327	2
	799843	1
	805853	6
	862247	1
	862270	1
	862299	1
	911429	1
	911453	1
	995958	1
	995977	1
	1027516	2
	1048356	1
	1071392	3
	1086399	1
	1088278	2
	1126387	3
	1146357	2
	1173717	2
	1175297	1
	1197203	1
	1230876	1
	1237733	1
	1237751	1
	1250777	1
	1250781	1
	1250804	1
	1250813	1
	1319464	2
	1339138	1
	1339146	1
	1362890	1
	1371479	1
	1371500	1
	1379981	4
	1393314	1
	1393334	1
	1409580	7
	1427787	9
	1427840	11
	1427848	11
	1427847	11
	1427855	10
	1435561	1
	1482745	3
	1573930	1
	1575923	2
	1599511	6
	1609040	1
	1609049	1
	1609060	1
	1609057	1
	1609068	1
	1612992	1
	1613017	2
	1662036	4
	1707335	1
	1749856	1
	1875759	1
	1902576	10
	1966247	1
	1966260	1
	1966259	1
	1966273	1
	2022872	1
	2152721	2
	2174790	2
	2242088	1
	2286469	2
	2328374	3
	2340193	1
	2402409	1
	2454943	1
	2454959	1
	2502813	2
	2562224	1
	2562241	1
	2562233	1
	2562250	1
	2562240	1
	2562256	1
	2562267	1
	2612829	3
	2615388	6
	2676032	1
	2690382	1
	2690390	1
	2690393	1
	2696300	10
	2696347	10
	2708379	1
	2723081	1
	2724453	1
	2724471	1
	2747747	1
	2759145	3
	2772010	7
	2795646	2
	2852911	4
	2878402	4
	2932716	2
	2935300	4
	2937814	2
	2946035	3
	2959103	17
	2959111	17
	2959108	17
	2959116	17
	2968926	1
	2968952	1
	2968974	1
	2993085	1
	3007286	2
	3042705	1
	3090260	1
	3090272	1
	3090266	1
	3090278	1
	3090281	1
	3090293	1
	3092115	1
	3093635	2
	3110918	2
	3125026	1
	3125044	1
	3132938	1
	3132955	1
	3151411	1
	3153332	11
	3153350	13
	3153348	12
	3153366	14
	3210093	1
	3226501	65
	3226541	86
	3226557	91
	3226556	90
	3226572	96
	3226576	93
	3226579	94
	3226583	92
	3227627	1
	3305088	11
	3335008	5
	3335051	7
	3408555	6
	3422880	5
	3435878	6
	3435920	6
	3468957	3
	3471286	2
	3475669	15
	3475680	15
	3475680	15
	3475691	15
	3477560	1
	3479496	1
	3487509	2
	3513954	1
	3513974	1
	3523436	1
	3525029	1
	3558708	1
	3560951	10
	3583299	6
	3589372	1
	3602357	2
	3618206	1
	3619145	6
	3635930	2
	3658214	1
	3658226	1
	3658225	1
	3658237	1
	3685794	8
	3690089	1
	3729166	6
	3773649	1
	3783511	4
	3783534	4
	3783556	4
	3795728	3
	3815386	1
	3820333	1
	3850992	6
	3851151	3
	3856795	3
	3862387	5
	3863538	6
	3865553	2
	3878716	7
	3878727	7
	3904894	2
	3905780	5
	3934111	2
	3940950	1
	3940972	1
	3949817	4
	3961074	1
	3963292	3
	3976738	2
	3990959	16
	4029472	1
	4029476	1
	4043136	28
	4043154	27
	4043154	28
	4043172	27
	4058623	1
	4094039	14
	4094205	19
	4094251	21
	4095914	13
	4116355	7
	4134315	1
	4151519	3
	4161856	2
	4162973	2
	4186637	3
	4212457	6
	4230133	1
	4243195	5
	4248721	32
	4248739	34
	4248739	34
	4248757	36
	4285756	1
	4312782	1
	4315833	4
	4341383	2
	4345377	2
	4353317	24
	4367424	6
	4383931	7
	4383938	7
	4410804	6
	4422033	1
	4422043	1
	4422055	1
	4422059	1
	4422071	1
	4422598	1
	4425736	1
	4425754	1
	4428327	1
	4453814	1
	4498471	1
	4498475	1
	4498485	1
	4498479	1
	4498483	1
	4498493	1
	4498496	1
	4498506	1
	4510032	3
	4512159	1
	4547247	2
	4554555	4
	4563617	3
	4595765	28
	4595784	32
	4595774	30
	4595793	34
	4601160	2
	4603133	51
	4603149	59
	4603149	58
	4603165	66
	4603172	64
	4603183	65
	4603172	64
	4603180	62
	4603190	64
	4603195	63
	4603183	65
	4603190	63
	4603201	65
	4603206	64
	4603195	62
	4603206	64
	4603211	63
	4606106	3
	4608076	1
	4619856	1
	4630084	2
	4651216	5
	4651233	5
	4659718	158
	4659722	158
	4659726	153
	4659729	153
	4672674	1
	4687150	1
	4695199	7
	4696096	10
	4696115	10
	4696136	11
	4725088	1
	4725095	1
	4725105	1
	4743742	15
	4743798	26
	4745251	2
	4747781	1
	4748008	1
	4778371	1
	4798121	1
	4798148	1
	4798163	1
	4804821	2
	4821701	2
	4836395	14
	4847916	1
	4847933	1
	4857385	1
	4861927	1
	4862975	3
