# Supplementary material for: Transcription termination and antitermination of bacterial CRISPR arrays
Source: eLife journal article supplement (doi:10.7554/elife.58182), 2020-10-30
Supplement: supp [file elife-58182-supp-v1.zip › elife_poa_e58182_Supplementary_file_2.xlsx]

## Sheet: Sheet1
	Supplementary file 2. Assignment of ChIP-seq peak centers to spacers, and relative Cas5 occupancy at each peak center
							Relative FLAG3-Cas5 occupancy
	Uniquely Assigned Spacer?	Spacer Assignment #1a	Spacer Assignment #2a	Spacer Assignment #3a	Spacer Assignment #4a	ChIP-seq Peak Centerb	Wild-Type, Replicate 1	Wild-Type, Replicate 2	ΔCRISPR-I, Replicate 1	ΔCRISPR-I, Replicate 2	CRISPR-I boxA*, Replicate 1	CRISPR-I boxA*, Replicate 2	CRISPR-II boxA*, Replicate 1	CRISPR-II boxA*, Replicate 2	Wild-Type +BCM, Replicate 1	Wild-Type +BCM, Replicate 2	CRISPR-I boxA* +BCM, Replicate 1	CRISPR-I boxA* +BCM, Replicate 2	CRISPR-II boxA* +BCM, Replicate 1	CRISPR-II boxA* +BCM, Replicate 2	nusE* + empty vector, Replicate 1	nusE* + empty vector, Replicate 2	nusE* + nusE (plasmid), Replicate 1	nusE* + nusE (plasmid), Replicate 2	nusE* + empty vector +BCM, Replicate 1	nusE* + empty vector +BCM, Replicate 2
	Y	1_5	2_20	2_26	2_7	503419	3033	4639	208	320	6657	3552	2077	2114	5225	3290	4921	4900	5354	3453	6776	6954	12265	7914	11460	9969
	Y	1_13	2_16	2_24	2_8	4345376	3842	4944	273	207	3227	1591	2706	3434	3722	2177	4433	2967	3465	3869	2966	2936	8361	7001	5662	5425
	Y	1_17	1_21	2_13		4861926	3190	3733	4351	13100	6460	3028	332	270	3929	2971	4964	8945	3547	4964	1170	1218	4652	3067	10459	9197
	Y	1_6	2_1	2_24		2328373	7151	5651	208	478	7197	3341	2303	2862	13289	5259	13053	10238	9976	10332	9387	9635	14062	10556	54456	35739
	Y	1_2	2_10	2_6		3862386	6012	8180	171	440	13952	6568	4183	3726	3432	3924	2613	4601	2781	4043	8286	6689	8926	9005	5007	5556
	Y	1_1	2_1			781326	3920	6074	137	250	9209	5273	2414	2691	4694	2125	4400	7714	7823	5434	6842	7755	8449	7148	7107	7991
	Y	1_11	2_1			2612828	4493	6099	153	271	6716	3015	3407	3323	4252	3396	3378	3293	3779	4741	3637	2736	10395	7980	9415	8309
	Y	1_14	2_10			4804820	4815	5258	320	615	2770	1563	2426	2901	4227	1889	2139	2507	3413	4295	1272	1404	4992	4418	5129	3923
	Y	1_5	2_10			2932715	4595	4317	364	334	11109	4858	3122	2934	9176	5541	6576	10332	8535	7813	7942	5847	17955	16126	18821	15083
	Y	1_21	2_13			3850991	9404	11326	354	345	21622	10226	5445	5795	4417	5242	10305	4445	8074	7283	8604	8026	17927	15292	4688	5488
	Y	1_1	2_15			2968949	1744	2011	171	107	2865	1265	1120	1022	1215	489	1054	1593	1284	456	3315	4327	3633	4385	1572	1172
	Y	1_4	2_15			2993084	2219	2860	110	109	6433	2838	2297	2108	603	604	1362	2003	1247	1702	2968	2732	8017	5053	4907	3869
	Y	1_2	2_2			1175296	3159	3028	129	136	6567	2608	2381	2078	4631	2525	4025	4608	3567	6013	2889	2967	7365	6019	4522	4468
	Y	1_12	2_20			331550	2112	2258	104	161	1722	1220	1178	1336	1771	1717	1965	1274	1511	2198	1302	1284	1683	1515	2928	3014
	Y	1_2	2_20			4603171	57551	82973	154	321	120559	59356	34840	38428	39500	34860	41113	45367	34987	37485	49995	47615	92217	72587	39395	40919
	Y	1_1	2_23			4353316	30944	38799	358	489	70405	30988	22086	20986	9833	9664	11186	13001	11648	7433	39119	33291	44703	47907	21039	21080
	Y	1_2	2_23			3435898	8033	11814	139	192	17482	8897	6216	5494	4303	2279	4420	4586	3701	2399	9066	9112	14296	12487	4331	4766
	Y	1_1	2_24			3007285	4124	5720	148	261	7985	4516	2366	2353	2531	622	2513	3409	1820	2563	5811	5375	6273	4847	3186	3463
	Y	1_3	2_24			4043153	33705	38487	259	329	74627	34928	19043	18978	14533	15093	17165	22037	19580	12380	34549	30065	57644	52808	26546	25839
	Y	1_16	2_26			1230875	3183	4304	67	47	751	468	2632	2442	3164	2847	2096	2688	3455	5637	1340	1313	5476	4989	7007	5765
	Y	1_12	2_5			3475679	21377	28663	261	216	29970	12637	14298	13770	37658	36663	43629	55486	57947	51262	26968	28031	59962	64906	42753	41900
	Y	1_23	2_5			2562245	1564	2217	88	127	3586	1524	1227	1055	1211	1649	1504	2516	2350	760	2591	2163	5722	4052	4316	3712
	Y	1_4	2_6			1613004	2913	4290	26	149	7808	3815	2267	2442	2499	1006	3303	2352	3075	2220	6616	7620	15352	15117	4718	5220
	Y	1_5	2_6			2174789	3270	4513	107	135	7883	3867	2156	2018	6379	3401	5205	5648	4660	5664	3950	4010	7868	5631	10336	10448
	Y	1_1	2_7			1146356	3315	4245	195	118	7893	2935	2706	2473	4784	2872	6145	4860	4013	3411	4145	3594	6691	5388	7283	4656
	Y	1_1	2_9			1250794	1525	2346	113	255	4035	2160	1126	1188	1620	940	2070	3467	3083	1699	3425	2545	6058	4988	3472	3149
	Y	1_20	2_1			136070	6031	6518	8011	29045	9824	4205	3399	3414	2767	3063	3587	2946	2242	2818	5563	3811	4397	6027	4728	3655
	Y	1_6	2_1			2615387	11651	13952	16257	55448	24046	11053	6817	6530	4957	4382	4976	8403	5549	4764	8008	6907	15137	12556	11041	10478
	Y	1_21	2_13			113296	1703	2519	2091	6872	3954	1682	255	312	2640	2752	3659	5099	2229	829	349	421	2189	1279	5765	5665
	Y	1_19	2_23			4745250	4417	4493	7020	20899	9453	3758	398	455	7577	9137	10963	13868	7966	8825	1185	890	7827	6902	15324	12124
	Y	1_14	2_24			3558707	2952	3097	345	414	1970	1134	1896	2095	2819	1331	1738	2641	1811	2663	2115	1590	4548	3915	6032	4762
	Y	1_8	2_7			995967	1840	2827	359	446	3560	1976	1603	1706	2511	2617	2641	3331	3431	2246	4362	3047	7056	7044	4162	4093
	Y	1_1				78290	1772	2469	81	64	3292	1574	1068	933	371	1275	1221	1360	397	657	2792	2031	3089	2429	1396	1351
	Y	1_1				81565	5966	9057	224	196	11569	6010	3700	3929	2270	3747	2260	4794	2760	5113	7928	8019	8908	7623	5510	5242
	Y	1_1				260309	2243	2645	169	156	3559	2045	1212	1224	2601	507	1739	2279	1904	1055	4163	3981	4171	5496	3269	3100
	Y	1_1				284920	3382	5044	437	341	7613	3525	2642	2588	3584	4951	4643	4568	3908	3595	8028	7289	9659	9107	6215	5785
	Y	1_1				316369	7582	10207	164	151	14458	7584	4590	5314	5497	3129	8218	8107	6550	6461	9841	10319	11906	11787	10485	11876
	Y	1_1				354530	24133	35521	189	293	55696	29422	15425	16269	17497	18400	23771	26523	21453	19670	29916	30827	36113	37207	36062	39072
	Y	1_1				385712	2829	3210	628	318	5264	1889	2021	2264	3931	6161	4199	4565	1939	3563	3377	3757	3438	2410	3566	2362
	Y	1_1				391414	2300	3191	625	297	4920	2192	1823	1720	3335	3044	4811	3447	2888	4794	4612	4147	6520	5879	4025	3615
	Y	1_1				565916	2649	3208	170	206	4934	2299	1696	1667	3196	2424	1926	2096	3172	2917	3911	4318	5075	7239	3059	3496
	Y	1_1				648399	4727	7463	64	188	10425	6244	2771	2542	2230	2962	6304	4769	7117	6527	8955	8681	10371	13423	7278	7806
	Y	1_1				799842	1926	3063	90	116	4198	2870	1107	1200	2842	592	478	2053	3072	1609	3798	4139	4525	5118	2759	3258
	Y	1_1				911440	3434	2607	105	110	4205	1682	985	1076	5650	7351	7454	7544	5202	5675	7122	7824	7855	6460	17870	12709
	Y	1_1				1086398	2315	2279	65	91	3048	1984	974	811	850	2865	2293	2652	1456	2530	2541	2976	3903	2716	3186	2966
	Y	1_1				1319463	3820	4812	81	99	7012	3942	2014	2133	2583	3039	3125	4790	3642	2878	4677	4860	6785	6662	5199	5833
	Y	1_1				1362889	2310	2582	156	89	5187	2172	1783	1642	3485	2643	2951	3732	2187	6049	4908	2877	8083	5349	5351	4913
	Y	1_1				1393323	2926	3183	52	51	5209	2411	1469	1363	1935	1228	2598	3284	2634	646	3383	3196	4301	4717	3841	4566
	Y	1_1				1427820	12943	16652	568	1762	31717	14257	9083	9295	21602	17323	26432	31418	19341	21829	24937	22178	31836	29218	25994	26823
	Y	1_1				1707334	1828	2223	72	118	3590	1946	1004	978	1730	4502	4457	3964	4226	3074	0	0	0	0	0	0
	Y	1_1				1875758	2340	3693	70	58	5610	2147	2729	2351	2421	2526	3526	2309	2747	3075	4176	3759	6626	6211	4517	4761
	Y	1_1				1966259	1585	2166	245	158	3196	1546	986	955	2353	3101	2696	4532	2712	2367	2325	1914	3831	3431	3382	3538
	Y	1_1				2286468	3051	4283	86	62	6592	2955	1618	1769	3573	3635	2649	3520	3614	2472	4903	7305	5475	6346	5005	5273
	Y	1_1				2696323	13417	18085	103	116	32318	17191	7494	7950	9358	9643	9613	16413	10937	7148	13822	17334	27221	23055	15776	18850
	Y	1_1				2708378	2353	2999	184	210	4125	1997	1254	1246	2004	3198	2550	3904	1438	2886	5415	3390	4219	4653	3976	4444
	Y	1_1				2747746	1392	1885	68	175	2693	1610	890	875	185	438	1531	1346	1560	205	3005	2404	2051	2284	1689	2068
	Y	1_1				2795645	3738	4603	94	83	6936	3543	1931	2042	939	1813	3235	4533	3594	3939	4864	5812	6381	6235	5378	5756
	Y	1_1				2935299	5054	6239	269	218	9880	4823	3563	3636	2727	1493	3339	3797	1912	4487	5758	3488	6575	6176	2608	2495
	Y	1_1				2946034	5704	8259	509	365	13996	5187	4509	4951	11156	7937	13464	14173	9105	9145	13321	13228	23148	20771	16762	16190
	Y	1_1				3042704	2380	3817	145	189	5683	2582	1679	1765	915	614	1200	1306	1531	2119	6560	5722	6654	5959	1100	1325
	Y	1_1				3090276	2030	2589	60	62	3888	1765	1606	1428	1657	1945	2679	1364	1747	1191	4055	2890	3969	3664	2561	2410
	Y	1_1				3110917	4207	5758	40	112	8463	4109	2187	2445	2580	2578	2733	4122	2801	5350	5793	7035	6919	7000	5391	5814
	Y	1_1				3151410	1979	2842	88	66	3343	1843	1067	1028	1946	1415	3117	2641	1931	494	2723	2889	3949	3359	1927	1948
	Y	1_1				3210092	2002	2852	91	100	3755	2107	1062	1399	1511	1863	1629	3170	2219	1615	3407	4434	4256	3317	3228	2942
	Y	1_1				3468956	4540	7403	112	230	15179	6888	3348	3107	3410	766	1830	4759	6866	14458	7207	7962	12895	13148	2827	3036
	Y	1_1				3513963	2409	3308	72	165	4168	2386	1074	1083	1025	344	1291	1587	1458	1	2991	2168	2852	2656	1984	1459
	Y	1_1				3523435	2276	2924	220	190	3374	1963	1493	1458	1622	1220	1382	854	732	1713	3038	2558	2613	3131	1476	1488
	Y	1_1				3602356	2673	3854	220	326	5776	2265	2283	2402	1338	1954	3834	3179	1792	694	5138	4670	5349	5159	2391	2020
	Y	1_1				3729165	10230	12939	1095	848	21521	9502	7187	6931	6044	3601	5642	7151	4066	5584	12081	14899	20604	22251	5518	5735
	Y	1_1				3856794	4216	5459	272	273	8797	4228	2651	2525	3193	1401	2261	3353	2703	2143	6653	7750	8534	8816	3487	3586
	Y	1_1				3863537	8591	11300	522	431	18968	10303	5202	4973	2467	3499	4563	4148	4161	3814	11699	9940	11633	12021	5751	5394
	Y	1_1				3976737	3375	4076	302	206	5691	3351	1886	1685	3259	2786	2452	2488	4884	2453	4811	4008	4588	4256	3607	3291
	Y	1_1				4095913	14078	21395	181	171	30299	15699	8649	9012	5325	3390	7532	5974	5643	2849	17900	14667	16605	18052	6971	6600
	Y	1_1				4151518	2617	3616	258	303	5276	2568	1557	1801	509	1426	200	1021	1540	1316	2309	2671	2407	3164	1134	1047
	Y	1_1				4230132	1977	2407	106	242	4008	2226	1180	1095	1396	356	1478	185	239	922	3725	2869	4255	3599	1514	1632
	Y	1_1				4285755	2881	3129	611	441	6070	2571	2293	1811	1019	1099	1319	1444	268	1283	4279	3959	4938	4629	2203	1376
	Y	1_1				4315832	7221	8018	668	490	14080	6751	5461	6088	6201	6145	7156	7775	7136	5470	12744	10335	12709	13389	8717	8220
	Y	1_1				4383934	8643	15043	160	203	21330	11826	5464	5634	4315	5164	6960	6327	6892	7243	14942	14719	15756	13170	6801	7331
	Y	1_1				4422597	2532	3044	65	146	4053	2092	1381	1358	881	1028	976	2396	1422	47	2546	1621	3333	3902	1898	1884
	Y	1_1				4510031	6253	8165	490	224	13272	6310	3477	3863	3718	5483	7309	4648	3625	4550	7641	6643	8981	10609	4619	4459
	Y	1_1				4547246	3432	5233	214	166	7233	3837	2357	2039	3231	3197	4011	1662	2191	2270	6276	6413	7434	9180	3499	3509
	Y	1_1				4563616	4048	5275	172	185	9053	4125	2865	2873	2139	2793	1746	2893	2360	1999	4261	4702	6390	5037	1650	1580
	Y	1_1				4630083	2839	3856	245	96	4624	2794	1623	1707	1501	3068	2980	2068	1597	1644	3729	4431	6083	4106	2494	1981
	Y	1_1				4696115	16645	20590	687	545	31994	14361	9980	9474	14756	10167	15796	12710	15015	13623	19952	19980	26748	26180	28402	24126
	Y	1_1				4747780	2481	3074	295	355	3729	1794	1411	1282	1366	552	880	1055	1045	1375	2582	2131	2757	3023	1891	1278
	Y	1_1				4857384	1761	2312	196	608	3327	1877	1131	1059	811	509	1577	1018	434	2096	2150	2259	2448	2387	1295	1405
	Y	1_1				4862974	5773	8421	219	250	13989	6407	3606	4032	4996	5240	5596	7118	5662	7697	9588	8696	15622	14118	11102	9231
	Y	1_11				37110	13045	14506	579	411	17710	7593	7569	8066	11409	6304	15534	11236	11660	20751	9888	9442	23959	22760	19333	19083
	Y	1_11				67716	2277	2844	144	275	2585	1488	1579	1372	3976	919	1985	2085	3786	460	2828	2311	5055	3799	3786	3764
	Y	1_11				85304	2150	2836	140	292	2713	1132	1367	1411	849	1648	777	1428	972	2313	1502	1457	3323	3076	2402	2120
	Y	1_11				137573	1574	2045	168	267	2015	1168	1052	1067	834	1997	1013	1194	3177	636	2273	2086	4102	2657	3629	3093
	Y	1_11				1371489	2331	3074	126	75	3751	1788	1859	1994	4162	3983	2601	5544	4147	4699	2712	2849	5668	4853	7272	7307
	Y	1_11				1435560	2376	2323	54	50	2752	1245	1500	1743	3093	5531	3818	4541	3910	4722	2656	2505	4912	5137	7865	6864
	Y	1_11				1482744	3375	4384	45	70	5776	2660	2713	2746	4606	4303	3978	4890	6919	7325	4465	4675	9713	9864	8927	8750
	Y	1_11				3093634	4144	4524	105	158	5757	2809	2294	2376	4862	6666	7370	3791	4109	5686	3913	3674	7759	8619	13116	13119
	Y	1_11				3905779	8628	10009	197	151	10848	6495	4615	5360	6249	5304	7104	7188	6222	7952	5327	4877	12393	10654	16726	15043
	Y	1_11				3934110	3614	4429	416	494	3490	2111	2322	2090	2134	1468	2543	1036	2486	2063	3510	3858	5400	4304	4231	4145
	Y	1_11				3949816	6907	7619	358	266	8508	3738	3933	4356	7088	2072	4284	6363	4499	3343	5098	4438	12153	9348	10470	8837
	Y	1_11				4094038	20614	26470	1392	1330	24121	12139	12935	12755	7707	8991	9551	11675	7764	6485	15420	14937	18884	18791	8585	10221
	Y	1_11				4595778	48699	59709	315	366	62287	25950	33177	32577	242753	206940	219061	268512	232919	241343	316301	289543	320510	320641	301182	288926
	Y	1_11				4798141	2300	2919	306	258	3211	1856	1601	1328	31	715	1977	945	956	1340	1493	1697	2345	3676	2593	2290
	Y	1_12				2676031	1411	2171	108	161	1940	981	1278	1407	988	1365	1034	2095	2291	1891	1497	1411	3401	2464	3576	3884
	Y	1_14				3904893	3638	4666	677	577	3115	1459	2846	2612	8876	4426	3071	5025	5161	7489	1785	1674	8839	7970	6608	6288
	Y	1_14				4687149	2679	2480	315	240	1398	804	1195	1186	3098	2234	3058	2190	2949	2612	1246	1609	4403	3284	4660	3622
	Y	1_17				28623	2331	2355	110	111	799	426	1668	1491	3275	795	729	1186	1725	1686	588	940	4905	3763	1754	2156
	Y	1_18				4672673	1463	1890	322	359	2632	1583	909	856	117	1718	1326	853	1083	1071	1475	1191	2129	2056	1054	823
	Y	1_2				171781	1803	2077	201	135	4209	2427	1163	1190	1302	1658	1270	1824	802	1462	1435	1237	2514	2173	2064	1854
	Y	1_2				547471	2228	4040	192	275	5602	2705	1655	1772	3639	2728	2072	1782	2826	2311	5516	5883	8888	8347	1735	2146
	Y	1_2				1126386	4251	5745	70	90	10553	4563	3483	3577	2415	5640	2080	4840	4224	4569	7028	8238	11236	12633	4565	4494
	Y	1_2				1339141	2344	2279	355	199	4694	1725	1738	1834	1906	1377	2934	2069	1091	1006	1916	2066	5861	4174	3003	2044
	Y	1_2				1409579	8252	9448	195	159	18437	7237	5847	6028	3985	3142	4728	3798	3498	1946	5049	4934	11071	10363	4284	4025
	Y	1_2				2724461	2774	3651	188	216	5854	2649	2477	2311	888	2332	1641	3032	1839	1040	3100	2552	5789	5078	2407	2803
	Y	1_2				3408554	9778	12715	130	281	23296	11371	6119	5764	3305	2931	1588	6541	3917	2889	10135	8023	16642	16350	4387	4830
	Y	1_2				3865552	4016	5173	167	120	9823	4673	2876	2652	2126	4949	1803	3569	2115	1496	6099	5688	8463	10458	3059	3199
	Y	1_2				4248738	55184	66165	190	372	125356	54654	33142	34370	29005	29005	29208	32397	29062	34608	43836	43480	97992	94138	34492	34135
	Y	1_2				4606105	5403	7714	278	373	13162	6044	4099	3783	3771	1147	1914	4698	2701	3024	9329	8192	13854	12135	4337	4738
	Y	1_2				4836394	15647	21763	591	373	39848	19658	13196	12071	7680	6231	5982	9898	9865	7723	16373	16806	34640	30365	8862	8811
	Y	1_3				134582	1835	2292	1869	1077	3876	2646	2311	2250	804	1436	1103	1958	1290	27	3752	2476	5681	4667	2491	2384
	Y	1_3				259664	3865	5547	95	96	9143	4097	2935	2837	1388	1903	1734	2040	1043	2307	4872	3871	8726	7194	4096	4106
	Y	1_3				360797	39852	42800	96	227	76310	38063	22707	23183	44875	30412	43599	50177	44575	49404	82261	75706	88203	80667	62232	65752
	Y	1_3				1237741	1527	1821	359	166	2844	1395	1254	1459	3306	6398	1889	2843	2485	1900	3169	3252	4391	3952	5473	4429
	Y	1_3				1599510	8984	11280	202	76	20221	8538	7658	7773	8078	5062	9951	7540	8436	7408	11934	10730	29933	28452	15717	14049
	Y	1_3				2723080	1705	2756	76	67	4114	1998	1358	1285	831	171	1632	2348	1809	2184	2271	2974	6902	4118	2430	2054
	Y	1_3				3227626	2082	2542	208	302	4501	1942	1842	1685	1201	1212	1438	2907	1406	1748	3123	2392	6740	6132	3715	3341
	Y	1_3				4601159	3480	4802	155	264	7197	3880	2476	2427	3412	3279	2375	1767	3869	6582	4525	3879	9211	7381	6129	6009
	Y	1_3				4743769	33191	42964	2262	1755	71764	28777	23524	24216	42945	43087	47486	49083	41778	40160	46194	45319	62279	51108	24335	24666
	Y	1_4				166935	10657	14771	87	139	27202	13856	6660	6952	5806	6412	6808	10525	6829	5537	8237	6765	23169	17245	11881	14370
	Y	1_4				292686	5424	7195	393	308	13668	6590	5393	4837	4570	3621	4080	6339	4400	5180	8403	6561	19473	18583	7926	7954
	Y	1_4				1173716	2834	3844	129	75	5769	2438	2159	2533	2788	2860	3026	3882	2070	2550	5281	5168	6062	6160	8528	7183
	Y	1_4				1575922	2988	4417	176	192	7023	3396	2735	3050	6264	4709	7249	8023	6516	6808	5904	7108	18473	16894	9497	9753
	Y	1_4				1902575	15729	18849	85	150	33513	15130	10543	11028	18213	16613	19164	30698	22087	22600	18849	14940	46937	37553	51629	46134
	Y	1_4				2502812	2401	3662	193	195	5718	2576	2050	2427	5731	1770	6584	9315	7724	8370	5697	4693	11568	8584	15641	17792
	Y	1_4				2852910	9943	12713	674	601	25660	11715	9249	8553	9651	8099	9797	13858	9023	12064	18953	15410	42282	40857	16061	15621
	Y	1_4				2959109	25839	35783	148	176	58072	27070	17408	16591	17848	14106	17379	24046	19092	17330	29774	28293	73001	58483	22003	22988
	Y	1_4				3153348	14646	21988	97	179	40046	17973	12598	11894	19935	20823	25196	29208	18531	25243	27898	26110	65515	53394	27063	26234
	Y	1_4				3226541	73745	99873	222	418	170301	74566	50933	52554	104370	96830	100419	149881	118534	107781	166645	164863	207349	190944	127423	127727
	Y	1_4				3583298	11062	13931	805	564	28377	13028	10350	9634	9903	8491	10191	13682	9298	11856	19336	15880	43347	41508	16224	16173
	Y	1_4				3589371	2273	2351	414	230	4522	2309	2029	2016	2073	3018	1107	1715	1019	176	5589	4426	10310	11652	2502	2465
	Y	1_4				3618205	1970	2649	232	238	4344	2368	1531	1833	1944	2116	1623	1937	1772	869	4033	4187	5994	5940	2339	2432
	Y	1_4				3783533	7038	8178	242	174	16339	7555	4955	4953	5458	6121	4600	5229	3617	5720	7747	6145	14825	12790	10173	9694
	Y	1_4				4116354	10688	13086	802	692	24979	12771	9807	9529	6439	7253	9305	8341	6801	10295	15691	14150	26875	27582	9506	9050
	Y	1_4				4212456	6109	7251	438	300	14584	6637	5605	5234	4393	3769	4885	6649	4035	5370	8655	7464	19817	19307	8017	7941
	Y	1_4				4367423	6096	7523	408	341	14493	6769	5615	5152	4292	3824	4384	7006	4223	5384	8568	7308	19787	19504	7809	7540
	Y	1_4				4410803	5727	7163	427	296	14327	6745	5516	5123	4519	3651	4745	6590	4146	5232	8422	7444	20066	18990	7952	7871
	Y	1_4				4498488	1824	1886	953	809	3159	1533	1283	1161	2410	5652	1448	4224	2662	2112	3414	1383	3364	2808	4734	3871
	Y	1_4				4695198	9190	12014	149	182	18616	9535	5381	5417	3308	3351	4448	4323	6244	4721	9352	9198	20065	17633	9826	9569
	Y	1_5				270914	4283	6063	110	101	10052	4690	3191	3393	2954	4080	4692	4481	4126	2988	5652	4592	11727	9465	7344	7472
	Y	1_5				862272	2072	2673	91	171	4966	2386	1242	1072	1637	1323	1583	1795	1640	1630	2535	3052	5635	4938	3948	3843
	Y	1_5				3422879	5798	9195	235	366	16748	8589	4820	4843	6188	7203	11154	11620	8661	10574	13450	12272	29512	24719	15846	17821
	Y	1_5				3479495	1834	1813	397	383	3505	2091	1414	1201	1205	864	668	1071	2038	268	3018	2314	4485	3859	1258	1111
	Y	1_5				3487508	3587	4859	457	382	7883	3649	2464	2321	1380	1076	1219	2731	1954	117	5643	4788	10945	7872	2272	2410
	Y	1_5				3619144	11841	17864	229	196	26411	11503	10024	9520	9566	6449	6956	9506	9397	8364	17898	15574	30306	33122	16751	13446
	Y	1_5				4453813	3352	3137	150	129	5204	2120	2247	2005	856	347	849	597	703	480	2486	2797	3651	4181	2516	1834
	Y	1_5				4659723	167915	226771	344	896	301992	150702	103985	106594	134245	124599	137309	181821	134704	132906	213698	213061	229777	200235	282021	282171
	Y	1_6				3092114	2068	2367	415	370	4626	2256	1527	1557	1622	921	2258	2043	2085	2871	3449	3991	4747	5619	4158	3873
	Y	1_6				3125034	1650	2315	436	143	3864	2170	1549	1364	611	1282	983	1911	1704	446	1795	1368	4449	4715	2268	2143
	Y	1_6				3132946	1532	1530	127	227	2554	1369	853	704	1531	560	1732	453	1897	3498	2231	2150	3160	2314	2099	2265
	Y	1_6				4778370	2738	3275	149	78	4412	2477	1683	1319	1456	1753	1690	1573	1307	1119	3078	3122	3707	3176	3116	2803
	Y	1_7				1027515	3284	4482	79	23	7508	3138	2088	2534	3724	2285	5559	5118	7055	5126	4869	3107	7989	5281	8882	8297
	Y	1_7				2690387	1557	2449	91	243	5239	2615	1239	1088	2984	3321	2100	2556	3882	1653	1868	1349	3268	2005	3952	5258
	Y	1_7				2937813	4483	5626	39	134	8195	4124	2950	2924	3812	3363	3541	3554	5035	5849	3613	3263	8334	5788	5924	6201
	Y	1_7				3940960	2518	2740	288	297	3892	2197	1507	1610	1869	837	2684	2108	939	1899	4870	3158	4471	5059	4823	4056
	Y	1_8				658872	1860	2461	70	81	2225	1013	1022	1088	1096	1701	1788	1871	2619	2511	1560	1275	3410	2435	3334	3485
	Y	1_8				1573929	1584	1905	138	52	2637	840	1296	1316	1900	1651	1131	2197	921	2719	1618	1539	3502	2617	3282	2894
	Y	1_8				3690088	1555	2876	247	432	3298	1771	1859	1850	974	2263	605	1466	1339	0	1746	1242	2694	5208	908	1455
	Y	1_8				4243194	6370	8528	135	157	10729	5119	3917	3896	2812	3949	3783	5459	5167	6036	8235	5576	14202	12822	6312	6304
	Y	1_8				4512158	1851	3055	178	234	3225	1916	1259	1578	436	1091	1365	808	372	2017	2796	3012	4206	3718	2259	1763
	Y	1_8				4619855	2702	4394	142	175	5417	3419	2080	2147	2283	1329	2576	2257	849	374	4089	3951	7240	6146	3250	4013
	Y	1_8				4821700	3676	5128	234	208	6527	3525	2891	2468	1357	179	3763	2158	2547	1783	3441	4979	7634	6335	4866	5214
	Y	1_9				3878721	10670	13604	117	174	15613	7892	7105	7168	3973	3702	4922	7731	5133	3344	7300	7565	14582	11743	16850	13563
	Y	2_1				74672	5067	6963	7055	27761	10780	5758	3295	3408	2240	2215	1167	2029	3814	2184	6696	4142	10200	8699	5484	5454
	Y	2_1				1662035	6345	9304	9967	32934	13887	6300	5321	5422	8795	14705	12664	13199	10983	11359	0	0	0	0	0	4
	Y	2_1				3685793	10901	16651	19226	66158	28163	13851	6512	6045	4949	3592	3551	7865	4233	6908	7027	7082	16175	16910	9044	8046
	Y	2_10				114993	3461	4179	3350	14650	7110	3564	213	222	4850	4645	5488	5751	5198	1946	678	459	2605	1434	7683	6812
	Y	2_10				2022871	1997	3214	3902	10869	5602	2323	359	361	12586	9987	11647	13977	9661	10474	954	945	4572	3738	22586	19800
	Y	2_10				2454950	2672	3625	3512	12295	6693	2990	380	358	24126	20952	22218	21408	18507	23275	1759	1925	6598	4722	24712	25019
	Y	2_10				3820332	2318	2970	2739	9018	4149	2511	242	295	5279	5618	4809	8631	3446	5084	871	788	2571	2522	7354	8137
	Y	2_2				1048355	1406	2317	2314	8132	3913	2324	755	861	2245	1982	4495	3235	3453	947	1025	1086	3068	1905	4108	4505
	Y	2_2				4161855	3167	4344	5285	17339	6920	2885	1826	1753	2485	2085	1768	2759	2289	3784	3512	3225	4934	3580	4615	4429
	Y	2_20				533628	2705	3515	4195	15112	6305	2713	342	322	6771	5665	8632	11331	8738	8905	753	1860	3263	3482	14043	14392
	Y	2_22				254924	4887	5382	7808	20367	9588	4643	863	853	16495	10928	12370	11504	9191	7824	2175	1952	7014	5822	9009	8462
	Y	2_23				2772009	11414	11450	17899	48090	22248	8036	792	1044	35186	26967	40878	39798	29527	24392	2702	2271	7515	6418	40366	42231
	Y	2_9				530680	3799	5615	7604	23578	9045	4455	589	632	10165	7609	13215	14038	10036	8713	1815	2193	5037	4452	24898	25130
	Y	2_9				3990958	21228	22637	36909	104871	44947	17816	1528	1581	31071	22001	25490	33416	21265	21657	6160	4496	14148	13902	52925	48313
	N	1_1	1_9	2_10	2_14	3963291	4509	6900	830	1266	9233	4748	3399	3349	5591	3596	2980	7116	5559	4445	7689	9274	14423	15600	2617	2914
	N	1_1	1_21	2_13	2_19	2878401	6619	7124	140	104	14045	5794	5100	4951	4774	7562	7671	8206	6387	5311	8522	8362	13849	10825	20901	19330
	N	1_21	1_6	2_13	2_19	4428326	1685	1719	890	977	2272	1460	951	1040	1447	299	1306	2367	220	1220	1067	853	2665	3138	1659	1464
	N	1_2	1_4	2_23	2_26	3335029	8056	10941	335	337	17051	7995	5423	4916	5160	7399	7192	9469	8012	6138	9846	10694	17291	17186	8307	7614
	N	1_1	1_12	1_22		444928	1778	2610	88	190	3151	1932	1060	932	1167	571	1554	2055	1011	2564	795	1288	1956	1926	2051	2757
	N	1_1	1_20	1_3		510542	2844	4444	167	152	6308	3305	1813	1763	2459	2167	1434	3763	3273	2401	6033	4594	7947	6405	5366	5621
	N	1_2	1_20	1_3		4422051	1509	1888	152	185	3238	1529	1037	1056	924	651	1130	652	1235	1522	1967	2024	3724	2581	2090	2170
	N	1_1	1_16	1_8		3961073	1934	2480	166	289	3656	2200	1033	1151	638	230	958	1420	1123	2519	2186	2793	3555	2850	1141	1442
	N	1_21	1_4	2_13		4554554	5839	6624	360	540	1845	855	3525	3934	7192	4857	5217	5975	6191	6614	2832	2982	8864	7746	5212	5122
	N	1_13	1_2	2_16		3815385	2294	3133	282	339	2276	1186	1626	1404	2765	2838	2327	1283	3569	493	2036	2015	4435	3639	3345	2966
	N	1_21	2_13	2_19		3658225	1185	1767	1512	6551	3155	1306	258	251	1625	759	2891	2764	2445	1041	688	290	1315	1428	4414	3905
	N	1_10	2_1	2_25		283323	3638	5545	7527	23263	9284	4344	2767	2869	2364	1660	5069	5209	3740	3032	3655	4539	8698	6435	6957	7428
	N	1_11	1_19	2_26		4134314	3761	3281	166	183	4174	1611	2404	2753	5970	3996	4746	4159	3127	4677	3539	4143	4426	3927	4975	5210
	N	1_1	1_22	2_4		1379980	6936	9942	264	200	15000	6170	6921	6705	5714	5977	6574	8473	5155	6196	14572	15567	18370	16706	12320	10169
	N	1_1	2_1	2_4		4312781	2559	3620	594	1083	6240	2777	2260	2244	2813	4346	1814	1375	2386	248	5666	5459	9208	7459	4335	3581
	N	1_1	1_17	2_7		3635929	2073	3103	939	602	5705	2900	2602	2732	2044	1486	1416	2362	2287	403	4863	3991	5265	5679	2740	3222
	N	1_1	1_9	2_7		4094227	27242	35804	2030	1937	44779	20956	19381	18991	13246	9829	9410	9000	12599	8939	39433	34552	29294	29725	10767	9766
	N	1_1	1_11			3795727	6124	8666	264	275	11413	5984	3676	3883	4413	3517	6331	6292	5501	4255	9916	9593	12191	10579	9161	8074
	N	1_1	1_12			3471285	3578	4421	235	237	9008	3967	2526	2677	2504	2281	2893	2636	2778	4397	6846	6209	11509	8155	4712	5124
	N	1_1	1_14			2759144	5021	6068	191	245	9742	4772	3247	3099	3444	2617	4486	4301	5215	3395	7629	10031	14540	13309	5963	5092
	N	1_1	1_14			3477559	2586	3524	88	158	4663	2485	1433	1486	2662	1774	2569	1887	2344	3856	5891	5529	4967	7458	3328	3609
	N	1_1	1_14			4162972	3494	4831	578	504	6921	3023	2388	2470	1714	3819	2536	3988	1384	2904	5545	4647	7429	7349	2322	1907
	N	1_1	1_18			3851150	5724	7429	304	292	11695	4906	3355	3412	3341	1872	2337	5063	4843	3257	8159	7249	8269	7373	2514	2059
	N	1_14	1_2			3773648	3353	4630	498	413	6314	3762	2199	2709	1791	200	2381	3763	2047	1185	5098	5081	6526	5532	2765	2414
	N	1_2	1_20			162127	2478	3334	361	321	873	616	1500	1594	5349	5726	1370	5013	6059	7071	1689	1122	7240	4262	3490	3875
	N	1_1	1_21			805852	6491	8122	124	147	14986	7646	4153	4131	5921	5877	8727	10747	9111	10525	6512	9122	12485	12443	8877	11215
	N	1_1	1_3			2340192	2191	3614	88	80	5517	2696	1858	1562	2987	1024	5082	3860	3194	4667	4863	4901	6223	7202	6906	6367
	N	1_3	1_4			1749855	1835	2087	183	231	4366	1594	1867	1823	5459	3817	5421	5933	3454	4070	0	0	0	0	0	0
	N	1_24	1_5			3305087	12676	17627	164	241	30700	13988	9205	9821	19601	16652	22509	23873	16198	19848	18652	23246	40914	33618	34108	35551
	N	1_22	1_6			188885	1981	1951	157	220	3924	1795	1179	897	743	844	1922	2535	3450	3388	2549	1499	2871	1648	1932	2133
	N	1_1	1_8			4847924	2226	3169	61	135	4794	2409	1666	1663	1815	1933	2323	2457	2677	2111	4858	3590	5797	5207	2237	2017
	N	1_2	1_8			4651224	7943	11054	81	243	17887	9458	5151	4517	3461	4754	6593	4761	5484	6540	8489	9445	15812	14079	3638	4270
	N	1_4	1_8			2152720	3357	4044	67	70	5659	3082	1977	1986	3497	2536	1788	3643	1856	1289	4648	4286	7844	6008	5720	6437
	N	1_5	1_9			1197202	1633	2097	110	166	2899	1680	1109	1098	583	1000	3278	3138	1140	632	3121	2128	4221	2702	3330	3683
	N	1_1	2_15			4425744	1402	1893	348	255	2377	1298	997	1040	1171	1171	2272	1485	688	0	2566	2203	2566	1844	1249	1126
	N	1_9	2_15			4058622	1695	2327	480	428	2838	1588	1407	1494	1325	1420	962	450	1312	1312	3012	1415	3023	2998	1993	2231
	N	1_4	2_24			3560950	14447	13864	2293	6527	30683	13066	9666	8553	5154	4763	3798	8051	3363	3954	11018	9922	20632	18729	11174	10426
	N	2_10	2_24			1609053	2244	2967	2385	8216	3998	2087	180	152	6552	3158	5648	9955	8025	9739	1240	497	2642	1784	7410	8937
	N	1_11	2_6			4608075	1422	1858	260	381	1916	876	994	1212	186	280	491	1464	220	1987	1886	1888	1479	2558	1611	1507
	N	2_10	2_6			704128	2517	2583	3102	8841	4002	1820	306	249	5718	5910	7905	8212	4401	4618	599	734	2257	1872	12230	10834
	N	2_13	2_6			4725096	2740	4141	4192	13823	6637	3207	261	244	5025	6193	5091	4901	5156	8093	1164	873	3385	3107	7737	8503
	N					461724	6348	7310	211	187	12993	5776	4805	4195	3386	1675	3607	4594	2923	2568	7019	5578	18928	13098	9150	7189
	N					608634	1338	1643	100	123	2935	1532	646	667	893	0	140	1320	926	710	710	786	1608	2092	838	1218
	N					1071391	211	175	101	43	167	128	125	145	835	592	35	536	694	1121	681	685	1239	312	1976	1798
	N					1088277	4839	4272	6392	17850	9347	3278	270	327	11099	10394	12465	12346	7915	6652	874	567	3590	3634	31490	25506
	N					2242087	1071	1223	33	36	455	230	715	775	1704	717	1750	1257	1488	1089	703	765	1227	745	3039	2454
	N					2402408	1234	1578	1152	5415	3062	1254	137	136	2253	2258	2729	3218	2850	3788	670	516	1159	1620	4996	6022
	N					3525028	1792	2514	732	422	3819	1967	1613	1669	1099	1328	265	1502	717	764	2412	2042	4061	3953	1171	1100
	N					4029473	1119	1579	1155	5196	2914	1288	142	144	2228	2269	2788	3240	2806	3268	633	453	1250	1527	5275	6063
	N					4186636	4769	6628	227	284	11443	5592	3581	3677	2034	790	3869	3167	1552	1819	4695	4953	7253	6615	2751	3182
	N					4341382	2264	2662	2053	9612	5873	2285	305	310	3854	3689	5034	3823	6210	3741	412	311	1983	1447	3076	3057
	N					4748007	2282	3201	4378	12893	5991	2700	1325	1236	3453	681	3286	2578	1533	1489	2038	1814	5278	3898	3718	2914
	Footnotes
	a	Confidently assigned spacers are highlighted in yellow
	b	Coordinates refer to the 14028s chromosomal reference sequence (NC_003198.1)
