# Supplementary material for: Transcription termination and antitermination of bacterial CRISPR arrays
Source: eLife journal article supplement (doi:10.7554/elife.58182), 2020-10-30
Supplement: supp [file elife-58182-supp-v1.zip › elife_poa_e58182_Supplementary_file_3.xlsx]

## Sheet: Sheet1
	Supplementary file 3. Conservation analysis of nusB across the bacterial kingdom
	Phylum	Class	Order	Family	Genus	Species|taxid	NusB
	Acidobacteria	Holophagae	Holophagales	Holophagaceae	Geothrix	Geothrix fermentans|1121920	No
	Actinobacteria	Actinobacteria	Acidimicrobiales	Acidimicrobiaceae	Acidimicrobium	Acidimicrobium ferrooxidans|525909	No
	Actinobacteria	Actinobacteria	Actinomycetales	Corynebacteriaceae	Corynebacterium	Corynebacterium maris|1224163	No
	Actinobacteria	Actinobacteria	Actinomycetales	Glycomycetaceae	Stackebrandtia	Stackebrandtia nassauensis|446470	No
	Actinobacteria	Actinobacteria	Actinomycetales	Segniliparaceae	Segniliparus	Segniliparus rotundus|640132	No
	Aerophobetes					Aerophobetes bacterium SCGC AAA255-F10|1052817	No
	Armatimonadetes					Armatimonadetes bacterium JGI 0000077-K19|1104605	No
	Atribacteria					Atribacteria bacterium SCGC AAA252-M02|913317	No
	Bacteroidetes	Bacteroidia	Bacteroidales	Bacteroidaceae	Bacteroides	Bacteroides nordii|1203608	No
	Bacteroidetes	Bacteroidia	Bacteroidales	Bacteroidaceae	Bacteroides	Bacteroides rodentium|1236512	No
	Bacteroidetes	Bacteroidia	Bacteroidales	Porphyromonadaceae	Porphyromonas	Porphyromonas macacae|1236521	No
	Bacteroidetes	Bacteroidia	Bacteroidales	Porphyromonadaceae	Tannerella	Tannerella forsythia|203275	No
	Bacteroidetes	Bacteroidia	Bacteroidales	Prevotellaceae	Prevotella	Prevotella denticola|1122982	No
	Bacteroidetes	Bacteroidia	Bacteroidales	Prevotellaceae	Prevotella	Prevotella pleuritidis|1236494	No
	Bacteroidetes	Bacteroidia	Bacteroidales	Prevotellaceae	Prevotella	Prevotella veroralis|1122993	No
	Bacteroidetes	Cytophagia	Cytophagales	Cyclobacteriaceae	Nitritalea	Nitritalea halalkaliphila|1189621	No
	Bacteroidetes	Cytophagia	Cytophagales	Cytophagaceae	Emticicia	Emticicia oligotrophica|929562	No
	Bacteroidetes	Cytophagia	Cytophagales	Cytophagaceae	Fibrella	Fibrella aestuarina|1166018	No
	Bacteroidetes	Cytophagia	Cytophagales	Cytophagaceae	Flectobacillus	Flectobacillus major|929703	No
	Bacteroidetes	Cytophagia	Cytophagales	Cytophagaceae	Flexibacter	Flexibacter litoralis|880071	No
	Bacteroidetes	Cytophagia	Cytophagales	Cytophagaceae	Spirosoma	Spirosoma linguale|504472	No
	Bacteroidetes	Cytophagia	Cytophagales	Cytophagaceae		Cytophagaceae bacterium JGI 0001001-B3|1094958	No
	Bacteroidetes	Cytophagia	Cytophagales	Flammeovirgaceae	Marivirga	Marivirga tractuosa|643867	No
	Bacteroidetes	Flavobacteriia	Flavobacteriales	Flavobacteriaceae	Capnocytophaga	Capnocytophaga canimorsus|860228	No
	Bacteroidetes	Flavobacteriia	Flavobacteriales	Flavobacteriaceae	Croceibacter	Croceibacter atlanticus|216432	No
	Bacteroidetes	Flavobacteriia	Flavobacteriales	Flavobacteriaceae	Dokdonia	Dokdonia sp. 4H-3-7-5|983548	No
	Bacteroidetes	Flavobacteriia	Flavobacteriales	Flavobacteriaceae	Gramella	Gramella forsetii|411154	No
	Bacteroidetes	Flavobacteriia	Flavobacteriales	Flavobacteriaceae	Robiginitalea	Robiginitalea biformata|313596	No
	Bacteroidetes	Flavobacteriia	Flavobacteriales	Flavobacteriaceae	Weeksella	Weeksella virosa|865938	No
	Bacteroidetes	Flavobacteriia	Flavobacteriales	Flavobacteriaceae	Zunongwangia	Zunongwangia profunda|655815	No
	Bacteroidetes	Sphingobacteriia	Sphingobacteriales	Saprospiraceae	Lewinella	Lewinella cohaerens|1122176	No
	Bacteroidetes	Sphingobacteriia	Sphingobacteriales	Sphingobacteriaceae	Solitalea	Solitalea canadensis|929556	No
	Bacteroidetes	Sphingobacteriia	Sphingobacteriales		Niastella	Niastella koreensis|700598	No
	Bacteroidetes	Sphingobacteriia	Sphingobacteriales			Chitinophagaceae bacterium JGI 0001013-J17|1268323	No
	Bacteroidetes					Cytophagales bacterium B6|100480	No
	Chlamydiae	Chlamydiia	Chlamydiales	Simkaniaceae	Simkania	Simkania negevensis|331113	No
	Chloroflexi	Anaerolineae	Anaerolineales	Anaerolineaceae	Anaerolinea	Anaerolinea thermophila|926569	No
	Chloroflexi	Thermomicrobia	Thermomicrobiales	Thermomicrobiaceae	Thermomicrobium	Thermomicrobium roseum|309801	No
	Chloroflexi					SAR202 cluster bacterium SCGC AAA240-N13|913328	No
	Chrysiogenetes	Chrysiogenetes	Chrysiogenales	Chrysiogenaceae	Desulfurispirillum	Desulfurispirillum indicum|653733	No
	Cyanobacteria		Pleurocapsales		Chroococcidiopsis	Chroococcidiopsis thermalis|251229	No
	Deferribacteres	Deferribacteres	Deferribacterales	Deferribacteraceae	Calditerrivibrio	Calditerrivibrio nitroreducens|768670	No
	Deferribacteres	Deferribacteres	Deferribacterales	Deferribacteraceae	Deferribacter	Deferribacter desulfuricans|639282	No
	Fervidibacteria				Candidatus Fervidibacter	Candidatus Fervidibacter sacchari|1383060	No
	Firmicutes	Bacilli	Lactobacillales	Aerococcaceae	Aerococcus	Aerococcus urinae|866775	No
	Firmicutes	Bacilli	Lactobacillales	Leuconostocaceae	Leuconostoc	Leuconostoc fallax|907931	No
	Firmicutes	Clostridia	Clostridiales	Clostridiaceae	Alkaliphilus	Alkaliphilus metalliredigens|293826	No
	Firmicutes	Clostridia	Clostridiales	Heliobacteriaceae	Heliobacterium	Heliobacterium modesticaldum|498761	No
	Firmicutes	Clostridia	Clostridiales	Ruminococcaceae	Ruminococcus	Ruminococcus champanellensis|213810	No
	Firmicutes	Clostridia	Thermoanaerobacterales	Thermodesulfobiaceae	Thermodesulfobium	Thermodesulfobium narugense|747365	No
	Firmicutes	Erysipelotrichia	Erysipelotrichales	Erysipelotrichaceae		[Eubacterium] cylindroides|717960	No
	Gemmatimonadetes	Gemmatimonadetes	Gemmatimonadales	Gemmatimonadaceae	Gemmatimonas	Gemmatimonas aurantiaca|379066	No
	Microgenomates					Microgenomates bacterium SCGC AAA011-L6|699262	No
	Nitrospirae	Nitrospira	Nitrospirales	Nitrospiraceae	Leptospirillum	Leptospirillum ferrooxidans|1162668	No
	Planctomycetes	Planctomycetia	Planctomycetales	Planctomycetaceae	Planctomyces	Planctomyces limnophilus|521674	No
	Planctomycetes	Planctomycetia	Planctomycetales	Planctomycetaceae		planctomycete KSU-1|247490	No
	Poribacteria					Candidatus Poribacteria sp. WGA-4E|857041	No
	Proteobacteria	Alphaproteobacteria	Magnetococcales	Magnetococcaceae	Magnetococcus	Magnetococcus marinus|156889	No
	Proteobacteria	Alphaproteobacteria	Parvularculales	Parvularculaceae	Parvularcula	Parvularcula bermudensis|314260	No
	Proteobacteria	Alphaproteobacteria	Rhizobiales	Bartonellaceae	Bartonella	Bartonella australis|1094489	No
	Proteobacteria	Alphaproteobacteria	Rhizobiales	Bradyrhizobiaceae	Rhodopseudomonas	Rhodopseudomonas sp. B29|95607	No
	Proteobacteria	Alphaproteobacteria	Rhizobiales	Hyphomicrobiaceae	Rhodomicrobium	Rhodomicrobium vannielii|648757	No
	Proteobacteria	Alphaproteobacteria	Rhizobiales	Methylobacteriaceae	Methylobacterium	Methylobacterium radiotolerans|426355	No
	Proteobacteria	Alphaproteobacteria	Rhizobiales	Xanthobacteraceae	Xanthobacter	Xanthobacter autotrophicus|78245	No
	Proteobacteria	Alphaproteobacteria	Rhodobacterales	Hyphomonadaceae	Hyphomonas	Hyphomonas neptunium|228405	No
	Proteobacteria	Alphaproteobacteria	Rhodospirillales	Rhodospirillaceae	Rhodospirillum	Rhodospirillum centenum|414684	No
	Proteobacteria	Alphaproteobacteria	Rhodospirillales	Rhodospirillaceae	Rhodospirillum	Rhodospirillum photometricum|1150469	No
	Proteobacteria	Alphaproteobacteria	Rhodospirillales	Rhodospirillaceae	Tistrella	Tistrella mobilis|1110502	No
	Proteobacteria	Alphaproteobacteria	Rickettsiales	Rickettsiaceae	Orientia	Orientia tsutsugamushi|357244	No
	Proteobacteria	Betaproteobacteria	Burkholderiales	Alcaligenaceae	Bordetella	Bordetella avium|360910	No
	Proteobacteria	Betaproteobacteria	Burkholderiales	Burkholderiaceae	Candidatus Glomeribacter	Candidatus Glomeribacter gigasporarum|1070319	No
	Proteobacteria	Betaproteobacteria	Burkholderiales	Burkholderiaceae	Ralstonia	Ralstonia pickettii|1366050	No
	Proteobacteria	Deltaproteobacteria	Desulfurellales	Desulfurellaceae	Hippea	Hippea maritima|760142	No
	Proteobacteria	Deltaproteobacteria	Syntrophobacterales	Syntrophaceae	Desulfobacca	Desulfobacca acetoxidans|880072	No
	Proteobacteria	Deltaproteobacteria	Syntrophobacterales	Syntrophaceae	Syntrophus	Syntrophus aciditrophicus|56780	No
	Proteobacteria	Epsilonproteobacteria	Campylobacterales	Campylobacteraceae	Campylobacter	Campylobacter jejuni|197	No
	Proteobacteria	Epsilonproteobacteria	Campylobacterales	Helicobacteraceae	Helicobacter	Helicobacter bizzozeronii|1002805	No
	Proteobacteria	Epsilonproteobacteria	Campylobacterales	Helicobacteraceae	Helicobacter	Helicobacter muridarum|216	No
	Proteobacteria	Epsilonproteobacteria	Campylobacterales	Helicobacteraceae	Helicobacter	Helicobacter sanguini|1548018	No
	Proteobacteria	Epsilonproteobacteria	Campylobacterales	Helicobacteraceae	Helicobacter	Helicobacter trogontum|50960	No
	Proteobacteria	Gammaproteobacteria	Chromatiales	Halothiobacillaceae	Halothiobacillus	Halothiobacillus neapolitanus|555778	No
	Proteobacteria	Gammaproteobacteria	Oceanospirillales	Hahellaceae	Hahella	Hahella chejuensis|349521	No
	Proteobacteria	Gammaproteobacteria	Pseudomonadales	Pseudomonadaceae	Rhizobacter	Rhizobacter sp. JGI 0001007-A16|1298878	No
	Spirochaetes	Spirochaetia	Spirochaetales	Brachyspiraceae	Brachyspira	Brachyspira murdochii|526224	No
	Spirochaetes	Spirochaetia	Spirochaetales	Leptospiraceae	Leptospira	Leptospira biflexa|456481	No
	Spirochaetes	Spirochaetia	Spirochaetales	Leptospiraceae	Turneriella	Turneriella parva|869212	No
	Spirochaetes	Spirochaetia	Spirochaetales	Spirochaetaceae	Borrelia	Borrelia duttonii|412419	No
	Spirochaetes	Spirochaetia	Spirochaetales	Spirochaetaceae	Borrelia	Borrelia recurrentis|412418	No
	Spirochaetes	Spirochaetia	Spirochaetales	Spirochaetaceae	Sphaerochaeta	Sphaerochaeta coccoides|760011	No
	Synergistetes	Synergistia	Synergistales	Synergistaceae	Cloacibacillus	Cloacibacillus evryensis|866499	No
	Thermotogae	Thermotogae	Thermotogales	Thermotogaceae	Petrotoga	Petrotoga mobilis|403833	No
	Thermotogae	Thermotogae	Thermotogales	Thermotogaceae	Thermotoga	Thermotoga thermarum|688269	No
	Acidobacteria	Acidobacteriia	Acidobacteriales	Acidobacteriaceae	Acidobacterium	Acidobacterium capsulatum|240015	Yes
	Acidobacteria	Acidobacteriia	Acidobacteriales	Acidobacteriaceae	Acidobacterium	Acidobacterium sp. PMMR2|1382359	Yes
	Acidobacteria	Acidobacteriia	Acidobacteriales	Acidobacteriaceae	Granulicella	Granulicella mallensis|682795	Yes
	Acidobacteria	Acidobacteriia	Acidobacteriales	Acidobacteriaceae	Granulicella	Granulicella tundricola|1198114	Yes
	Acidobacteria	Acidobacteriia	Acidobacteriales	Acidobacteriaceae	Terriglobus	Terriglobus roseus|926566	Yes
	Acidobacteria	Acidobacteriia	Acidobacteriales	Acidobacteriaceae	Terriglobus	Terriglobus saanensis|401053	Yes
	Acidobacteria	Acidobacteriia	Acidobacteriales	Acidobacteriaceae		Acidobacteria bacterium KBS 146|639030	Yes
	Acidobacteria	Acidobacteriia	Acidobacteriales	Acidobacteriaceae		Acidobacteriaceae bacterium URHE0068|1380348	Yes
	Acidobacteria	Holophagae	Holophagales	Holophagaceae	Holophaga	Holophaga foetida|903818	Yes
	Acidobacteria	Solibacteres	Solibacterales	Solibacteraceae	Candidatus Solibacter	Candidatus Solibacter usitatus|234267	Yes
	Acidobacteria				Bryobacter	Bryobacter aggregatus|1340493	Yes
	Acidobacteria				Candidatus Chloracidobacterium	Candidatus Chloracidobacterium thermophilum|981222	Yes
	Acidobacteria				Candidatus Koribacter	Candidatus Koribacter versatilis|204669	Yes
	Acidobacteria				Thermoanaerobaculum	Thermoanaerobaculum aquaticum|1312852	Yes
	Actinobacteria	Actinobacteria	Acidimicrobiales	Acidimicrobiaceae	Ilumatobacter	Ilumatobacter coccineus|1313172	Yes
	Actinobacteria	Actinobacteria	Actinomycetales	Acidothermaceae	Acidothermus	Acidothermus cellulolyticus|351607	Yes
	Actinobacteria	Actinobacteria	Actinomycetales	Actinomycetaceae	Actinobaculum	Actinobaculum massiliense|883066	Yes
	Actinobacteria	Actinobacteria	Actinomycetales	Actinomycetaceae	Actinobaculum	Actinobaculum schaalii|1120932	Yes
	Actinobacteria	Actinobacteria	Actinomycetales	Actinomycetaceae	Actinobaculum	Actinobaculum sp. oral taxon 183|1227261	Yes
	Actinobacteria	Actinobacteria	Actinomycetales	Actinomycetaceae	Actinobaculum	Actinobaculum urinale|1120933	Yes
	Actinobacteria	Actinobacteria	Actinomycetales	Actinomycetaceae	Actinomyces	Actinomyces cardiffensis|888050	Yes
	Actinobacteria	Actinobacteria	Actinomycetales	Actinomycetaceae	Actinomyces	Actinomyces coleocanis|525245	Yes
	Actinobacteria	Actinobacteria	Actinomycetales	Actinomycetaceae	Actinomyces	Actinomyces dentalis|1120941	Yes
	Actinobacteria	Actinobacteria	Actinomycetales	Actinomycetaceae	Actinomyces	Actinomyces europaeus|883069	Yes
	Actinobacteria	Actinobacteria	Actinomycetales	Actinomycetaceae	Actinomyces	Actinomyces georgiae|1120942	Yes
	Actinobacteria	Actinobacteria	Actinomycetales	Actinomycetaceae	Actinomyces	Actinomyces gerencseriae|1120943	Yes
	Actinobacteria	Actinobacteria	Actinomycetales	Actinomycetaceae	Actinomyces	Actinomyces graevenitzii|1321817	Yes
	Actinobacteria	Actinobacteria	Actinomycetales	Actinomycetaceae	Actinomyces	Actinomyces johnsonii|1321818	Yes
	Actinobacteria	Actinobacteria	Actinomycetales	Actinomycetaceae	Actinomyces	Actinomyces massiliensis|1167628	Yes
	Actinobacteria	Actinobacteria	Actinomycetales	Actinomycetaceae	Actinomyces	Actinomyces naeslundii|1115803	Yes
	Actinobacteria	Actinobacteria	Actinomycetales	Actinomycetaceae	Actinomyces	Actinomyces neuii|1120945	Yes
	Actinobacteria	Actinobacteria	Actinomycetales	Actinomycetaceae	Actinomyces	Actinomyces odontolyticus|411466	Yes
	Actinobacteria	Actinobacteria	Actinomycetales	Actinomycetaceae	Actinomyces	Actinomyces oris|871541	Yes
	Actinobacteria	Actinobacteria	Actinomycetales	Actinomycetaceae	Actinomyces	Actinomyces slackii|1278298	Yes
	Actinobacteria	Actinobacteria	Actinomycetales	Actinomycetaceae	Actinomyces	Actinomyces sp. oral taxon 849|653386	Yes
	Actinobacteria	Actinobacteria	Actinomycetales	Actinomycetaceae	Actinomyces	Actinomyces suimastitidis|1120946	Yes
	Actinobacteria	Actinobacteria	Actinomycetales	Actinomycetaceae	Actinomyces	Actinomyces timonensis|521393	Yes
	Actinobacteria	Actinobacteria	Actinomycetales	Actinomycetaceae	Actinomyces	Actinomyces turicensis|883077	Yes
	Actinobacteria	Actinobacteria	Actinomycetales	Actinomycetaceae	Actinomyces	Actinomyces urogenitalis|525246	Yes
	Actinobacteria	Actinobacteria	Actinomycetales	Actinomycetaceae	Actinomyces	Actinomyces vaccimaxillae|1120947	Yes
	Actinobacteria	Actinobacteria	Actinomycetales	Actinomycetaceae	Actinomyces	Actinomyces viscosus|562973	Yes
	Actinobacteria	Actinobacteria	Actinomycetales	Actinomycetaceae	Arcanobacterium	Arcanobacterium haemolyticum|644284	Yes
	Actinobacteria	Actinobacteria	Actinomycetales	Actinomycetaceae	Arcanobacterium	Arcanobacterium sp. S3PF19|1219585	Yes
	Actinobacteria	Actinobacteria	Actinomycetales	Actinomycetaceae	Mobiluncus	Mobiluncus curtisii|887326	Yes
	Actinobacteria	Actinobacteria	Actinomycetales	Actinomycetaceae	Mobiluncus	Mobiluncus mulieris|585199	Yes
	Actinobacteria	Actinobacteria	Actinomycetales	Actinomycetaceae	Trueperella	Trueperella pyogenes|1448141	Yes
	Actinobacteria	Actinobacteria	Actinomycetales	Actinomycetaceae	Varibaculum	Varibaculum cambriense|1123488	Yes
	Actinobacteria	Actinobacteria	Actinomycetales	Actinopolysporaceae	Actinopolyspora	Actinopolyspora erythraea|414996	Yes
	Actinobacteria	Actinobacteria	Actinomycetales	Actinopolysporaceae	Actinopolyspora	Actinopolyspora halophila|1089546	Yes
	Actinobacteria	Actinobacteria	Actinomycetales	Actinopolysporaceae	Actinopolyspora	Actinopolyspora iraqiensis|882080	Yes
	Actinobacteria	Actinobacteria	Actinomycetales	Actinopolysporaceae	Actinopolyspora	Actinopolyspora mortivallis|1050202	Yes
	Actinobacteria	Actinobacteria	Actinomycetales	Actinospicaceae	Actinospica	Actinospica acidiphila|304899	Yes
	Actinobacteria	Actinobacteria	Actinomycetales	Beutenbergiaceae	Beutenbergia	Beutenbergia cavernae|471853	Yes
	Actinobacteria	Actinobacteria	Actinomycetales	Beutenbergiaceae	Salana	Salana multivorans|120377	Yes
	Actinobacteria	Actinobacteria	Actinomycetales	Bogoriellaceae	Georgenia	Georgenia sp. SUBG003|1497974	Yes
	Actinobacteria	Actinobacteria	Actinomycetales	Brevibacteriaceae	Brevibacterium	Brevibacterium album|1121122	Yes
	Actinobacteria	Actinobacteria	Actinomycetales	Brevibacteriaceae	Brevibacterium	Brevibacterium casei|1229781	Yes
	Actinobacteria	Actinobacteria	Actinomycetales	Brevibacteriaceae	Brevibacterium	Brevibacterium linens|321955	Yes
	Actinobacteria	Actinobacteria	Actinomycetales	Brevibacteriaceae	Brevibacterium	Brevibacterium massiliense|1176165	Yes
	Actinobacteria	Actinobacteria	Actinomycetales	Brevibacteriaceae	Brevibacterium	Brevibacterium mcbrellneri|585530	Yes
	Actinobacteria	Actinobacteria	Actinomycetales	Brevibacteriaceae	Brevibacterium	Brevibacterium senegalense|1033736	Yes
	Actinobacteria	Actinobacteria	Actinomycetales	Brevibacteriaceae	Brevibacterium	Brevibacterium sp. VCM10|1381751	Yes
	Actinobacteria	Actinobacteria	Actinomycetales	Catenulisporaceae	Catenulispora	Catenulispora acidiphila|479433	Yes
	Actinobacteria	Actinobacteria	Actinomycetales	Cellulomonadaceae	Actinotalea	Actinotalea fermentans|862422	Yes
	Actinobacteria	Actinobacteria	Actinomycetales	Cellulomonadaceae	Actinotalea	Actinotalea ferrariae|948458	Yes
	Actinobacteria	Actinobacteria	Actinomycetales	Cellulomonadaceae	Cellulomonas	[Cellvibrio] gilvus|593907	Yes
	Actinobacteria	Actinobacteria	Actinomycetales	Cellulomonadaceae	Cellulomonas	Cellulomonas bogoriensis|1386082	Yes
	Actinobacteria	Actinobacteria	Actinomycetales	Cellulomonadaceae	Cellulomonas	Cellulomonas carbonis|947969	Yes
	Actinobacteria	Actinobacteria	Actinomycetales	Cellulomonadaceae	Cellulomonas	Cellulomonas cellasea|1408250	Yes
	Actinobacteria	Actinobacteria	Actinomycetales	Cellulomonadaceae	Cellulomonas	Cellulomonas fimi|590998	Yes
	Actinobacteria	Actinobacteria	Actinomycetales	Cellulomonadaceae	Cellulomonas	Cellulomonas flavigena|446466	Yes
	Actinobacteria	Actinobacteria	Actinomycetales	Cellulomonadaceae	Cellulomonas	Cellulomonas massiliensis|1095767	Yes
	Actinobacteria	Actinobacteria	Actinomycetales	Cellulomonadaceae	Cellulomonas	Cellulomonas sp. URHD0024|1302620	Yes
	Actinobacteria	Actinobacteria	Actinomycetales	Cellulomonadaceae	Oerskovia	Oerskovia turbata|1713	Yes
	Actinobacteria	Actinobacteria	Actinomycetales	Cellulomonadaceae	Paraoerskovia	Paraoerskovia marina|1122933	Yes
	Actinobacteria	Actinobacteria	Actinomycetales	Corynebacteriaceae	Corynebacterium	Corynebacterium accolens|525260	Yes
	Actinobacteria	Actinobacteria	Actinomycetales	Corynebacteriaceae	Corynebacterium	Corynebacterium ammoniagenes|649754	Yes
	Actinobacteria	Actinobacteria	Actinomycetales	Corynebacteriaceae	Corynebacterium	Corynebacterium amycolatum|553204	Yes
	Actinobacteria	Actinobacteria	Actinomycetales	Corynebacteriaceae	Corynebacterium	Corynebacterium argentoratense|1348662	Yes
	Actinobacteria	Actinobacteria	Actinomycetales	Corynebacteriaceae	Corynebacterium	Corynebacterium atypicum|191610	Yes
	Actinobacteria	Actinobacteria	Actinomycetales	Corynebacteriaceae	Corynebacterium	Corynebacterium aurimucosum|548476	Yes
	Actinobacteria	Actinobacteria	Actinomycetales	Corynebacteriaceae	Corynebacterium	Corynebacterium auriscanis|99807	Yes
	Actinobacteria	Actinobacteria	Actinomycetales	Corynebacteriaceae	Corynebacterium	Corynebacterium bovis|927655	Yes
	Actinobacteria	Actinobacteria	Actinomycetales	Corynebacteriaceae	Corynebacterium	Corynebacterium callunae|1121353	Yes
	Actinobacteria	Actinobacteria	Actinomycetales	Corynebacteriaceae	Corynebacterium	Corynebacterium camporealensis|161896	Yes
	Actinobacteria	Actinobacteria	Actinomycetales	Corynebacteriaceae	Corynebacterium	Corynebacterium capitovis|1121354	Yes
	Actinobacteria	Actinobacteria	Actinomycetales	Corynebacteriaceae	Corynebacterium	Corynebacterium casei|1110505	Yes
	Actinobacteria	Actinobacteria	Actinomycetales	Corynebacteriaceae	Corynebacterium	Corynebacterium caspium|1121355	Yes
	Actinobacteria	Actinobacteria	Actinomycetales	Corynebacteriaceae	Corynebacterium	Corynebacterium ciconiae|1121356	Yes
	Actinobacteria	Actinobacteria	Actinomycetales	Corynebacteriaceae	Corynebacterium	Corynebacterium crenatum|168810	Yes
	Actinobacteria	Actinobacteria	Actinomycetales	Corynebacteriaceae	Corynebacterium	Corynebacterium diphtheriae|1206107	Yes
	Actinobacteria	Actinobacteria	Actinomycetales	Corynebacteriaceae	Corynebacterium	Corynebacterium doosanense|558173	Yes
	Actinobacteria	Actinobacteria	Actinomycetales	Corynebacteriaceae	Corynebacterium	Corynebacterium durum|1035195	Yes
	Actinobacteria	Actinobacteria	Actinomycetales	Corynebacteriaceae	Corynebacterium	Corynebacterium efficiens|196164	Yes
	Actinobacteria	Actinobacteria	Actinomycetales	Corynebacteriaceae	Corynebacterium	Corynebacterium falsenii|1451189	Yes
	Actinobacteria	Actinobacteria	Actinomycetales	Corynebacteriaceae	Corynebacterium	Corynebacterium freiburgense|1121360	Yes
	Actinobacteria	Actinobacteria	Actinomycetales	Corynebacteriaceae	Corynebacterium	Corynebacterium freneyi|1287475	Yes
	Actinobacteria	Actinobacteria	Actinomycetales	Corynebacteriaceae	Corynebacterium	Corynebacterium genitalium|585529	Yes
	Actinobacteria	Actinobacteria	Actinomycetales	Corynebacteriaceae	Corynebacterium	Corynebacterium glucuronolyticum|548478	Yes
	Actinobacteria	Actinobacteria	Actinomycetales	Corynebacteriaceae	Corynebacterium	Corynebacterium glutamicum|1198672	Yes
	Actinobacteria	Actinobacteria	Actinomycetales	Corynebacteriaceae	Corynebacterium	Corynebacterium glycinophilum|1404245	Yes
	Actinobacteria	Actinobacteria	Actinomycetales	Corynebacteriaceae	Corynebacterium	Corynebacterium halotolerans|1121362	Yes
	Actinobacteria	Actinobacteria	Actinomycetales	Corynebacteriaceae	Corynebacterium	Corynebacterium imitans|156978	Yes
	Actinobacteria	Actinobacteria	Actinomycetales	Corynebacteriaceae	Corynebacterium	Corynebacterium jeikeium|525262	Yes
	Actinobacteria	Actinobacteria	Actinomycetales	Corynebacteriaceae	Corynebacterium	Corynebacterium kroppenstedtii|645127	Yes
	Actinobacteria	Actinobacteria	Actinomycetales	Corynebacteriaceae	Corynebacterium	Corynebacterium lipophiloflavum|525263	Yes
	Actinobacteria	Actinobacteria	Actinomycetales	Corynebacteriaceae	Corynebacterium	Corynebacterium lubricantis|1121363	Yes
	Actinobacteria	Actinobacteria	Actinomycetales	Corynebacteriaceae	Corynebacterium	Corynebacterium massiliense|1121364	Yes
	Actinobacteria	Actinobacteria	Actinomycetales	Corynebacteriaceae	Corynebacterium	Corynebacterium mastitidis|1121365	Yes
	Actinobacteria	Actinobacteria	Actinomycetales	Corynebacteriaceae	Corynebacterium	Corynebacterium matruchotii|566549	Yes
	Actinobacteria	Actinobacteria	Actinomycetales	Corynebacteriaceae	Corynebacterium	Corynebacterium nuruki|863239	Yes
	Actinobacteria	Actinobacteria	Actinomycetales	Corynebacteriaceae	Corynebacterium	Corynebacterium pilosum|1121366	Yes
	Actinobacteria	Actinobacteria	Actinomycetales	Corynebacteriaceae	Corynebacterium	Corynebacterium propinquum|1121367	Yes
	Actinobacteria	Actinobacteria	Actinomycetales	Corynebacteriaceae	Corynebacterium	Corynebacterium pseudodiphtheriticum|1121368	Yes
	Actinobacteria	Actinobacteria	Actinomycetales	Corynebacteriaceae	Corynebacterium	Corynebacterium pseudogenitalium|525264	Yes
	Actinobacteria	Actinobacteria	Actinomycetales	Corynebacteriaceae	Corynebacterium	Corynebacterium pseudotuberculosis|1719	Yes
	Actinobacteria	Actinobacteria	Actinomycetales	Corynebacteriaceae	Corynebacterium	Corynebacterium pyruviciproducens|1125779	Yes
	Actinobacteria	Actinobacteria	Actinomycetales	Corynebacteriaceae	Corynebacterium	Corynebacterium resistens|662755	Yes
	Actinobacteria	Actinobacteria	Actinomycetales	Corynebacteriaceae	Corynebacterium	Corynebacterium sp. KPL1986|1203619	Yes
	Actinobacteria	Actinobacteria	Actinomycetales	Corynebacteriaceae	Corynebacterium	Corynebacterium sputi|1111729	Yes
	Actinobacteria	Actinobacteria	Actinomycetales	Corynebacteriaceae	Corynebacterium	Corynebacterium striatum|525268	Yes
	Actinobacteria	Actinobacteria	Actinomycetales	Corynebacteriaceae	Corynebacterium	Corynebacterium terpenotabidum|1200352	Yes
	Actinobacteria	Actinobacteria	Actinomycetales	Corynebacteriaceae	Corynebacterium	Corynebacterium tuberculostearicum|553206	Yes
	Actinobacteria	Actinobacteria	Actinomycetales	Corynebacteriaceae	Corynebacterium	Corynebacterium tuscaniense|1401064	Yes
	Actinobacteria	Actinobacteria	Actinomycetales	Corynebacteriaceae	Corynebacterium	Corynebacterium ulcerans|1408268	Yes
	Actinobacteria	Actinobacteria	Actinomycetales	Corynebacteriaceae	Corynebacterium	Corynebacterium ulceribovis|1121370	Yes
	Actinobacteria	Actinobacteria	Actinomycetales	Corynebacteriaceae	Corynebacterium	Corynebacterium urealyticum|504474	Yes
	Actinobacteria	Actinobacteria	Actinomycetales	Corynebacteriaceae	Corynebacterium	Corynebacterium ureicelerivorans|401472	Yes
	Actinobacteria	Actinobacteria	Actinomycetales	Corynebacteriaceae	Corynebacterium	Corynebacterium variabile|1727	Yes
	Actinobacteria	Actinobacteria	Actinomycetales	Corynebacteriaceae	Corynebacterium	Corynebacterium vitaeruminis|1224164	Yes
	Actinobacteria	Actinobacteria	Actinomycetales	Corynebacteriaceae	Turicella	Turicella otitidis|883169	Yes
	Actinobacteria	Actinobacteria	Actinomycetales	Corynebacteriaceae		Corynebacterium-like bacterium B27|95617	Yes
	Actinobacteria	Actinobacteria	Actinomycetales	Cryptosporangiaceae	Cryptosporangium	Cryptosporangium arvum|927661	Yes
	Actinobacteria	Actinobacteria	Actinomycetales	Dermabacteraceae	Brachybacterium	Brachybacterium faecium|446465	Yes
	Actinobacteria	Actinobacteria	Actinomycetales	Dermabacteraceae	Brachybacterium	Brachybacterium muris|1249481	Yes
	Actinobacteria	Actinobacteria	Actinomycetales	Dermabacteraceae	Brachybacterium	Brachybacterium paraconglomeratum|1064537	Yes
	Actinobacteria	Actinobacteria	Actinomycetales	Dermabacteraceae	Brachybacterium	Brachybacterium phenoliresistens|396014	Yes
	Actinobacteria	Actinobacteria	Actinomycetales	Dermabacteraceae	Brachybacterium	Brachybacterium squillarum|1074488	Yes
	Actinobacteria	Actinobacteria	Actinomycetales	Dermabacteraceae	Dermabacter	Dermabacter hominis|1450519	Yes
	Actinobacteria	Actinobacteria	Actinomycetales	Dermabacteraceae	Dermabacter	Dermabacter sp. HFH0086|1203568	Yes
	Actinobacteria	Actinobacteria	Actinomycetales	Dermacoccaceae	Demetria	Demetria terragena|1121385	Yes
	Actinobacteria	Actinobacteria	Actinomycetales	Dermacoccaceae	Dermacoccus	Dermacoccus nishinomiyaensis|1274	Yes
	Actinobacteria	Actinobacteria	Actinomycetales	Dermacoccaceae	Dermacoccus	Dermacoccus sp. Ellin185|188626	Yes
	Actinobacteria	Actinobacteria	Actinomycetales	Dermacoccaceae	Kytococcus	Kytococcus sedentarius|478801	Yes
	Actinobacteria	Actinobacteria	Actinomycetales	Dermatophilaceae	Austwickia	Austwickia chelonae|1184607	Yes
	Actinobacteria	Actinobacteria	Actinomycetales	Dermatophilaceae	Dermatophilus	Dermatophilus congolensis|1121387	Yes
	Actinobacteria	Actinobacteria	Actinomycetales	Dermatophilaceae	Kineosphaera	Kineosphaera limosa|1184609	Yes
	Actinobacteria	Actinobacteria	Actinomycetales	Dermatophilaceae	Mobilicoccus	Mobilicoccus pelagius|1089455	Yes
	Actinobacteria	Actinobacteria	Actinomycetales	Dietziaceae	Dietzia	Dietzia alimentaria|1077144	Yes
	Actinobacteria	Actinobacteria	Actinomycetales	Dietziaceae	Dietzia	Dietzia cinnamea|910954	Yes
	Actinobacteria	Actinobacteria	Actinomycetales	Dietziaceae	Dietzia	Dietzia sp. UCD-THP|1292020	Yes
	Actinobacteria	Actinobacteria	Actinomycetales	Frankiaceae	Frankia	Frankia alni|326424	Yes
	Actinobacteria	Actinobacteria	Actinomycetales	Frankiaceae	Frankia	Frankia sp. CN3|298655	Yes
	Actinobacteria	Actinobacteria	Actinomycetales	Frankiaceae	Frankia	Frankia symbiont of Datisca glomerata|656024	Yes
	Actinobacteria	Actinobacteria	Actinomycetales	Geodermatophilaceae	Blastococcus	Blastococcus saxobsidens|1146883	Yes
	Actinobacteria	Actinobacteria	Actinomycetales	Geodermatophilaceae	Blastococcus	Blastococcus sp. URHD0036|1380356	Yes
	Actinobacteria	Actinobacteria	Actinomycetales	Geodermatophilaceae	Geodermatophilus	Geodermatophilus obscurus|526225	Yes
	Actinobacteria	Actinobacteria	Actinomycetales	Geodermatophilaceae	Modestobacter	Modestobacter marinus|477641	Yes
	Actinobacteria	Actinobacteria	Actinomycetales	Geodermatophilaceae	Modestobacter	Modestobacter sp. KNN45-2b|1522368	Yes
	Actinobacteria	Actinobacteria	Actinomycetales	Geodermatophilaceae		Geodermatophilaceae bacterium URHA0031|1380393	Yes
	Actinobacteria	Actinobacteria	Actinomycetales	Glycomycetaceae	Glycomyces	Glycomyces arizonensis|1121926	Yes
	Actinobacteria	Actinobacteria	Actinomycetales	Glycomycetaceae	Glycomyces	Glycomyces sp. NRRL B-16210|1463821	Yes
	Actinobacteria	Actinobacteria	Actinomycetales	Glycomycetaceae	Glycomyces	Glycomyces tenuis|1111731	Yes
	Actinobacteria	Actinobacteria	Actinomycetales	Glycomycetaceae	Haloglycomyces	Haloglycomyces albus|1089549	Yes
	Actinobacteria	Actinobacteria	Actinomycetales	Gordoniaceae	Gordonia	Gordonia aichiensis|1220583	Yes
	Actinobacteria	Actinobacteria	Actinomycetales	Gordoniaceae	Gordonia	Gordonia alkanivorans|1027371	Yes
	Actinobacteria	Actinobacteria	Actinomycetales	Gordoniaceae	Gordonia	Gordonia amarae|1075090	Yes
	Actinobacteria	Actinobacteria	Actinomycetales	Gordoniaceae	Gordonia	Gordonia amicalis|1386969	Yes
	Actinobacteria	Actinobacteria	Actinomycetales	Gordoniaceae	Gordonia	Gordonia araii|1073574	Yes
	Actinobacteria	Actinobacteria	Actinomycetales	Gordoniaceae	Gordonia	Gordonia bronchialis|526226	Yes
	Actinobacteria	Actinobacteria	Actinomycetales	Gordoniaceae	Gordonia	Gordonia effusa|1077974	Yes
	Actinobacteria	Actinobacteria	Actinomycetales	Gordoniaceae	Gordonia	Gordonia hirsuta|1121927	Yes
	Actinobacteria	Actinobacteria	Actinomycetales	Gordoniaceae	Gordonia	Gordonia kroppenstedtii|468556	Yes
	Actinobacteria	Actinobacteria	Actinomycetales	Gordoniaceae	Gordonia	Gordonia malaquae|1223542	Yes
	Actinobacteria	Actinobacteria	Actinomycetales	Gordoniaceae	Gordonia	Gordonia namibiensis|1208314	Yes
	Actinobacteria	Actinobacteria	Actinomycetales	Gordoniaceae	Gordonia	Gordonia neofelifaecis|644548	Yes
	Actinobacteria	Actinobacteria	Actinomycetales	Gordoniaceae	Gordonia	Gordonia otitidis|1108044	Yes
	Actinobacteria	Actinobacteria	Actinomycetales	Gordoniaceae	Gordonia	Gordonia paraffinivorans|1223543	Yes
	Actinobacteria	Actinobacteria	Actinomycetales	Gordoniaceae	Gordonia	Gordonia polyisoprenivorans|1112204	Yes
	Actinobacteria	Actinobacteria	Actinomycetales	Gordoniaceae	Gordonia	Gordonia rhizosphera|1108045	Yes
	Actinobacteria	Actinobacteria	Actinomycetales	Gordoniaceae	Gordonia	Gordonia rubripertincta|1077975	Yes
	Actinobacteria	Actinobacteria	Actinomycetales	Gordoniaceae	Gordonia	Gordonia shandongensis|1121928	Yes
	Actinobacteria	Actinobacteria	Actinomycetales	Gordoniaceae	Gordonia	Gordonia sihwensis|1223544	Yes
	Actinobacteria	Actinobacteria	Actinomycetales	Gordoniaceae	Gordonia	Gordonia soli|1223545	Yes
	Actinobacteria	Actinobacteria	Actinomycetales	Gordoniaceae	Gordonia	Gordonia sp. KTR9|337191	Yes
	Actinobacteria	Actinobacteria	Actinomycetales	Gordoniaceae	Gordonia	Gordonia sputi|1089453	Yes
	Actinobacteria	Actinobacteria	Actinomycetales	Gordoniaceae	Gordonia	Gordonia terrae|2055	Yes
	Actinobacteria	Actinobacteria	Actinomycetales	Intrasporangiaceae	Arsenicicoccus	Arsenicicoccus bolidensis|1121017	Yes
	Actinobacteria	Actinobacteria	Actinomycetales	Intrasporangiaceae	Intrasporangium	Intrasporangium calvum|710696	Yes
	Actinobacteria	Actinobacteria	Actinomycetales	Intrasporangiaceae	Intrasporangium	Intrasporangium chromatireducens|584657	Yes
	Actinobacteria	Actinobacteria	Actinomycetales	Intrasporangiaceae	Intrasporangium	Intrasporangium oryzae|1386089	Yes
	Actinobacteria	Actinobacteria	Actinomycetales	Intrasporangiaceae	Janibacter	Janibacter hoylei|1210046	Yes
	Actinobacteria	Actinobacteria	Actinomycetales	Intrasporangiaceae	Janibacter	Janibacter sp. HTCC2649|313589	Yes
	Actinobacteria	Actinobacteria	Actinomycetales	Intrasporangiaceae	Knoellia	Knoellia aerolata|1385519	Yes
	Actinobacteria	Actinobacteria	Actinomycetales	Intrasporangiaceae	Knoellia	Knoellia flava|1385518	Yes
	Actinobacteria	Actinobacteria	Actinomycetales	Intrasporangiaceae	Knoellia	Knoellia sinensis|1385520	Yes
	Actinobacteria	Actinobacteria	Actinomycetales	Intrasporangiaceae	Knoellia	Knoellia subterranea|1385521	Yes
	Actinobacteria	Actinobacteria	Actinomycetales	Intrasporangiaceae	Ornithinimicrobium	Ornithinimicrobium pekingense|1122622	Yes
	Actinobacteria	Actinobacteria	Actinomycetales	Intrasporangiaceae	Phycicoccus	Phycicoccus jejuensis|367299	Yes
	Actinobacteria	Actinobacteria	Actinomycetales	Intrasporangiaceae	Serinicoccus	Serinicoccus marinus|1123251	Yes
	Actinobacteria	Actinobacteria	Actinomycetales	Intrasporangiaceae	Serinicoccus	Serinicoccus profundi|1043205	Yes
	Actinobacteria	Actinobacteria	Actinomycetales	Intrasporangiaceae	Terracoccus	Terracoccus sp. 273MFTsu3.1|1172188	Yes
	Actinobacteria	Actinobacteria	Actinomycetales	Intrasporangiaceae	Tetrasphaera	Tetrasphaera elongata|1193181	Yes
	Actinobacteria	Actinobacteria	Actinomycetales	Intrasporangiaceae		Intrasporangiaceae bacterium URHB0013|1380370	Yes
	Actinobacteria	Actinobacteria	Actinomycetales	Jiangellaceae	Jiangella	Jiangella gansuensis|987045	Yes
	Actinobacteria	Actinobacteria	Actinomycetales	Jonesiaceae	Jonesia	Jonesia denitrificans|471856	Yes
	Actinobacteria	Actinobacteria	Actinomycetales	Jonesiaceae	Jonesia	Jonesia quinghaiensis|1122130	Yes
	Actinobacteria	Actinobacteria	Actinomycetales	Kineosporiaceae	Kineococcus	Kineococcus radiotolerans|266940	Yes
	Actinobacteria	Actinobacteria	Actinomycetales	Microbacteriaceae	Agrococcus	Agrococcus lahaulensis|1120958	Yes
	Actinobacteria	Actinobacteria	Actinomycetales	Microbacteriaceae	Agrococcus	Agrococcus pavilionensis|1330458	Yes
	Actinobacteria	Actinobacteria	Actinomycetales	Microbacteriaceae	Agromyces	Agromyces italicus|1120959	Yes
	Actinobacteria	Actinobacteria	Actinomycetales	Microbacteriaceae	Agromyces	Agromyces subbeticus|1120960	Yes
	Actinobacteria	Actinobacteria	Actinomycetales	Microbacteriaceae	Candidatus Aquiluna	Candidatus Aquiluna sp. IMCC13023|1081644	Yes
	Actinobacteria	Actinobacteria	Actinomycetales	Microbacteriaceae	Candidatus Rhodoluna	Candidatus Rhodoluna lacicola|529884	Yes
	Actinobacteria	Actinobacteria	Actinomycetales	Microbacteriaceae	Clavibacter	Clavibacter michiganensis|1097677	Yes
	Actinobacteria	Actinobacteria	Actinomycetales	Microbacteriaceae	Cryobacterium	Cryobacterium roopkundense|1001240	Yes
	Actinobacteria	Actinobacteria	Actinomycetales	Microbacteriaceae	Cryobacterium	Cryobacterium sp. MLB-32|1529318	Yes
	Actinobacteria	Actinobacteria	Actinomycetales	Microbacteriaceae	Cryocola	Cryocola sp. 340MFSha3.1|1169145	Yes
	Actinobacteria	Actinobacteria	Actinomycetales	Microbacteriaceae	Curtobacterium	Curtobacterium flaccumfaciens|1292022	Yes
	Actinobacteria	Actinobacteria	Actinomycetales	Microbacteriaceae	Curtobacterium	Curtobacterium sp. B18|95614	Yes
	Actinobacteria	Actinobacteria	Actinomycetales	Microbacteriaceae	Glaciibacter	Glaciibacter superstes|1121924	Yes
	Actinobacteria	Actinobacteria	Actinomycetales	Microbacteriaceae	Gryllotalpicola	Gryllotalpicola ginsengisoli|1121372	Yes
	Actinobacteria	Actinobacteria	Actinomycetales	Microbacteriaceae	Gulosibacter	Gulosibacter molinativorax|1121934	Yes
	Actinobacteria	Actinobacteria	Actinomycetales	Microbacteriaceae	Humibacter	Humibacter albus|1121952	Yes
	Actinobacteria	Actinobacteria	Actinomycetales	Microbacteriaceae	Leifsonia	Leifsonia aquatica|1416759	Yes
	Actinobacteria	Actinobacteria	Actinomycetales	Microbacteriaceae	Leifsonia	Leifsonia rubra|1348338	Yes
	Actinobacteria	Actinobacteria	Actinomycetales	Microbacteriaceae	Leifsonia	Leifsonia sp. 109|1150399	Yes
	Actinobacteria	Actinobacteria	Actinomycetales	Microbacteriaceae	Leifsonia	Leifsonia xyli|281090	Yes
	Actinobacteria	Actinobacteria	Actinomycetales	Microbacteriaceae	Leucobacter	Leucobacter chironomi|1122175	Yes
	Actinobacteria	Actinobacteria	Actinomycetales	Microbacteriaceae	Leucobacter	Leucobacter chromiiresistens|714083	Yes
	Actinobacteria	Actinobacteria	Actinomycetales	Microbacteriaceae	Leucobacter	Leucobacter salsicius|1238186	Yes
	Actinobacteria	Actinobacteria	Actinomycetales	Microbacteriaceae	Leucobacter	Leucobacter sp. UCD-THU|1292023	Yes
	Actinobacteria	Actinobacteria	Actinomycetales	Microbacteriaceae	Microbacterium	Microbacterium barkeri|1197720	Yes
	Actinobacteria	Actinobacteria	Actinomycetales	Microbacteriaceae	Microbacterium	Microbacterium gubbeenense|1122237	Yes
	Actinobacteria	Actinobacteria	Actinomycetales	Microbacteriaceae	Microbacterium	Microbacterium indicum|1122238	Yes
	Actinobacteria	Actinobacteria	Actinomycetales	Microbacteriaceae	Microbacterium	Microbacterium laevaniformans|1160710	Yes
	Actinobacteria	Actinobacteria	Actinomycetales	Microbacteriaceae	Microbacterium	Microbacterium luticocti|1122239	Yes
	Actinobacteria	Actinobacteria	Actinomycetales	Microbacteriaceae	Microbacterium	Microbacterium maritypicum|1333857	Yes
	Actinobacteria	Actinobacteria	Actinomycetales	Microbacteriaceae	Microbacterium	Microbacterium oleivorans|273677	Yes
	Actinobacteria	Actinobacteria	Actinomycetales	Microbacteriaceae	Microbacterium	Microbacterium paraoxydans|1416752	Yes
	Actinobacteria	Actinobacteria	Actinomycetales	Microbacteriaceae	Microbacterium	Microbacterium profundi|450380	Yes
	Actinobacteria	Actinobacteria	Actinomycetales	Microbacteriaceae	Microbacterium	Microbacterium sp. SUBG005|1504156	Yes
	Actinobacteria	Actinobacteria	Actinomycetales	Microbacteriaceae	Microbacterium	Microbacterium testaceum|979556	Yes
	Actinobacteria	Actinobacteria	Actinomycetales	Microbacteriaceae	Microbacterium	Microbacterium yannicii|1194165	Yes
	Actinobacteria	Actinobacteria	Actinomycetales	Microbacteriaceae	Mycetocola	Mycetocola saprophilus|76636	Yes
	Actinobacteria	Actinobacteria	Actinomycetales	Microbacteriaceae	Pseudoclavibacter	Pseudoclavibacter faecalis|1278308	Yes
	Actinobacteria	Actinobacteria	Actinomycetales	Microbacteriaceae	Pseudoclavibacter	Pseudoclavibacter soli|1123013	Yes
	Actinobacteria	Actinobacteria	Actinomycetales	Microbacteriaceae	Rathayibacter	Rathayibacter toxicus|1123052	Yes
	Actinobacteria	Actinobacteria	Actinomycetales	Microbacteriaceae	Salinibacterium	Salinibacterium sp. PAMC 21357|1112215	Yes
	Actinobacteria	Actinobacteria	Actinomycetales	Micrococcaceae	Acaricomes	Acaricomes phytoseiuli|1120917	Yes
	Actinobacteria	Actinobacteria	Actinomycetales	Micrococcaceae	Arthrobacter	Arthrobacter albus|1401063	Yes
	Actinobacteria	Actinobacteria	Actinomycetales	Micrococcaceae	Arthrobacter	Arthrobacter arilaitensis|861360	Yes
	Actinobacteria	Actinobacteria	Actinomycetales	Micrococcaceae	Arthrobacter	Arthrobacter aurescens|290340	Yes
	Actinobacteria	Actinobacteria	Actinomycetales	Micrococcaceae	Arthrobacter	Arthrobacter castelli|1121019	Yes
	Actinobacteria	Actinobacteria	Actinomycetales	Micrococcaceae	Arthrobacter	Arthrobacter chlorophenolicus|452863	Yes
	Actinobacteria	Actinobacteria	Actinomycetales	Micrococcaceae	Arthrobacter	Arthrobacter crystallopoietes|1246476	Yes
	Actinobacteria	Actinobacteria	Actinomycetales	Micrococcaceae	Arthrobacter	Arthrobacter gangotriensis|1276920	Yes
	Actinobacteria	Actinobacteria	Actinomycetales	Micrococcaceae	Arthrobacter	Arthrobacter globiformis|1077972	Yes
	Actinobacteria	Actinobacteria	Actinomycetales	Micrococcaceae	Arthrobacter	Arthrobacter nicotinovorans|1292042	Yes
	Actinobacteria	Actinobacteria	Actinomycetales	Micrococcaceae	Arthrobacter	Arthrobacter phenanthrenivorans|930171	Yes
	Actinobacteria	Actinobacteria	Actinomycetales	Micrococcaceae	Arthrobacter	Arthrobacter sanguinis|1121020	Yes
	Actinobacteria	Actinobacteria	Actinomycetales	Micrococcaceae	Arthrobacter	Arthrobacter sp. Rue61a|1118963	Yes
	Actinobacteria	Actinobacteria	Actinomycetales	Micrococcaceae	Citricoccus	Citricoccus sp. CH26A|1045009	Yes
	Actinobacteria	Actinobacteria	Actinomycetales	Micrococcaceae	Kocuria	Kocuria atrinae|1179225	Yes
	Actinobacteria	Actinobacteria	Actinomycetales	Micrococcaceae	Kocuria	Kocuria marina|223184	Yes
	Actinobacteria	Actinobacteria	Actinomycetales	Micrococcaceae	Kocuria	Kocuria palustris|1236550	Yes
	Actinobacteria	Actinobacteria	Actinomycetales	Micrococcaceae	Kocuria	Kocuria polaris|136273	Yes
	Actinobacteria	Actinobacteria	Actinomycetales	Micrococcaceae	Kocuria	Kocuria rhizophila|1029824	Yes
	Actinobacteria	Actinobacteria	Actinomycetales	Micrococcaceae	Kocuria	Kocuria sp. UCD-OTCP|1292021	Yes
	Actinobacteria	Actinobacteria	Actinomycetales	Micrococcaceae	Micrococcus	Micrococcus luteus|1232675	Yes
	Actinobacteria	Actinobacteria	Actinomycetales	Micrococcaceae	Nesterenkonia	Nesterenkonia alba|1122602	Yes
	Actinobacteria	Actinobacteria	Actinomycetales	Micrococcaceae	Nesterenkonia	Nesterenkonia sp. AN1|652017	Yes
	Actinobacteria	Actinobacteria	Actinomycetales	Micrococcaceae	Renibacterium	Renibacterium salmoninarum|288705	Yes
	Actinobacteria	Actinobacteria	Actinomycetales	Micrococcaceae	Rothia	Rothia aeria|888019	Yes
	Actinobacteria	Actinobacteria	Actinomycetales	Micrococcaceae	Rothia	Rothia dentocariosa|563032	Yes
	Actinobacteria	Actinobacteria	Actinomycetales	Micrococcaceae	Rothia	Rothia mucilaginosa|563033	Yes
	Actinobacteria	Actinobacteria	Actinomycetales	Micrococcaceae	Sinomonas	Sinomonas sp. MUSC117|1338436	Yes
	Actinobacteria	Actinobacteria	Actinomycetales	Micrococcaceae	Yaniella	Yaniella halotolerans|1123507	Yes
	Actinobacteria	Actinobacteria	Actinomycetales	Micromonosporaceae	Actinocatenispora	Actinocatenispora sera|390989	Yes
	Actinobacteria	Actinobacteria	Actinomycetales	Micromonosporaceae	Actinoplanes	Actinoplanes friuliensis|1246995	Yes
	Actinobacteria	Actinobacteria	Actinomycetales	Micromonosporaceae	Actinoplanes	Actinoplanes globisporus|1120949	Yes
	Actinobacteria	Actinobacteria	Actinomycetales	Micromonosporaceae	Actinoplanes	Actinoplanes missouriensis|512565	Yes
	Actinobacteria	Actinobacteria	Actinomycetales	Micromonosporaceae	Actinoplanes	Actinoplanes sp. SE50/110|134676	Yes
	Actinobacteria	Actinobacteria	Actinomycetales	Micromonosporaceae	Actinoplanes	Actinoplanes subtropicus|543632	Yes
	Actinobacteria	Actinobacteria	Actinomycetales	Micromonosporaceae	Actinoplanes	Actinoplanes utahensis|1869	Yes
	Actinobacteria	Actinobacteria	Actinomycetales	Micromonosporaceae	Catelliglobosispora	Catelliglobosispora koreensis|1121272	Yes
	Actinobacteria	Actinobacteria	Actinomycetales	Micromonosporaceae	Catenuloplanes	Catenuloplanes japonicus|33876	Yes
	Actinobacteria	Actinobacteria	Actinomycetales	Micromonosporaceae	Dactylosporangium	Dactylosporangium aurantiacum|35754	Yes
	Actinobacteria	Actinobacteria	Actinomycetales	Micromonosporaceae	Hamadaea	Hamadaea tsunoensis|1121946	Yes
	Actinobacteria	Actinobacteria	Actinomycetales	Micromonosporaceae	Longispora	Longispora albida|1122182	Yes
	Actinobacteria	Actinobacteria	Actinomycetales	Micromonosporaceae	Micromonospora	Micromonospora aurantiaca|644283	Yes
	Actinobacteria	Actinobacteria	Actinomycetales	Micromonosporaceae	Micromonospora	Micromonospora chokoriensis|356851	Yes
	Actinobacteria	Actinobacteria	Actinomycetales	Micromonosporaceae	Micromonospora	Micromonospora globosa|47863	Yes
	Actinobacteria	Actinobacteria	Actinomycetales	Micromonosporaceae	Micromonospora	Micromonospora lupini|1150864	Yes
	Actinobacteria	Actinobacteria	Actinomycetales	Micromonosporaceae	Micromonospora	Micromonospora parva|1464048	Yes
	Actinobacteria	Actinobacteria	Actinomycetales	Micromonosporaceae	Micromonospora	Micromonospora purpureochromogenes|47872	Yes
	Actinobacteria	Actinobacteria	Actinomycetales	Micromonosporaceae	Micromonospora	Micromonospora sp. L5|648999	Yes
	Actinobacteria	Actinobacteria	Actinomycetales	Micromonosporaceae	Pilimelia	Pilimelia anulata|53371	Yes
	Actinobacteria	Actinobacteria	Actinomycetales	Micromonosporaceae	Salinispora	Salinispora arenicola|168697	Yes
	Actinobacteria	Actinobacteria	Actinomycetales	Micromonosporaceae	Salinispora	Salinispora pacifica|1137266	Yes
	Actinobacteria	Actinobacteria	Actinomycetales	Micromonosporaceae	Salinispora	Salinispora tropica|1169196	Yes
	Actinobacteria	Actinobacteria	Actinomycetales	Micromonosporaceae	Verrucosispora	Verrucosispora maris|263358	Yes
	Actinobacteria	Actinobacteria	Actinomycetales	Mycobacteriaceae	Amycolicicoccus	Amycolicicoccus subflavus|443218	Yes
	Actinobacteria	Actinobacteria	Actinomycetales	Mycobacteriaceae	Mycobacterium	Mycobacterium africanum|33894	Yes
	Actinobacteria	Actinobacteria	Actinomycetales	Mycobacteriaceae	Mycobacterium	Mycobacterium aromaticivorans|1440774	Yes
	Actinobacteria	Actinobacteria	Actinomycetales	Mycobacteriaceae	Mycobacterium	Mycobacterium avium|243243	Yes
	Actinobacteria	Actinobacteria	Actinomycetales	Mycobacteriaceae	Mycobacterium	Mycobacterium bovis|717522	Yes
	Actinobacteria	Actinobacteria	Actinomycetales	Mycobacteriaceae	Mycobacterium	Mycobacterium canettii|1205677	Yes
	Actinobacteria	Actinobacteria	Actinomycetales	Mycobacteriaceae	Mycobacterium	Mycobacterium chelonae|1299322	Yes
	Actinobacteria	Actinobacteria	Actinomycetales	Mycobacteriaceae	Mycobacterium	Mycobacterium chubuense|710421	Yes
	Actinobacteria	Actinobacteria	Actinomycetales	Mycobacteriaceae	Mycobacterium	Mycobacterium colombiense|1041522	Yes
	Actinobacteria	Actinobacteria	Actinomycetales	Mycobacteriaceae	Mycobacterium	Mycobacterium cosmeticum|258533	Yes
	Actinobacteria	Actinobacteria	Actinomycetales	Mycobacteriaceae	Mycobacterium	Mycobacterium farcinogenes|1802	Yes
	Actinobacteria	Actinobacteria	Actinomycetales	Mycobacteriaceae	Mycobacterium	Mycobacterium fortuitum|1451190	Yes
	Actinobacteria	Actinobacteria	Actinomycetales	Mycobacteriaceae	Mycobacterium	Mycobacterium gastri|1436723	Yes
	Actinobacteria	Actinobacteria	Actinomycetales	Mycobacteriaceae	Mycobacterium	Mycobacterium genavense|1408452	Yes
	Actinobacteria	Actinobacteria	Actinomycetales	Mycobacteriaceae	Mycobacterium	Mycobacterium gilvum|278137	Yes
	Actinobacteria	Actinobacteria	Actinomycetales	Mycobacteriaceae	Mycobacterium	Mycobacterium hassiacum|1122247	Yes
	Actinobacteria	Actinobacteria	Actinomycetales	Mycobacteriaceae	Mycobacterium	Mycobacterium indicus pranii|1232724	Yes
	Actinobacteria	Actinobacteria	Actinomycetales	Mycobacteriaceae	Mycobacterium	Mycobacterium intracellulare|1138382	Yes
	Actinobacteria	Actinobacteria	Actinomycetales	Mycobacteriaceae	Mycobacterium	Mycobacterium iranicum|1370125	Yes
	Actinobacteria	Actinobacteria	Actinomycetales	Mycobacteriaceae	Mycobacterium	Mycobacterium kansasii|557599	Yes
	Actinobacteria	Actinobacteria	Actinomycetales	Mycobacteriaceae	Mycobacterium	Mycobacterium leprae|561304	Yes
	Actinobacteria	Actinobacteria	Actinomycetales	Mycobacteriaceae	Mycobacterium	Mycobacterium liflandii|459424	Yes
	Actinobacteria	Actinobacteria	Actinomycetales	Mycobacteriaceae	Mycobacterium	Mycobacterium mageritense|1209984	Yes
	Actinobacteria	Actinobacteria	Actinomycetales	Mycobacteriaceae	Mycobacterium	Mycobacterium marinum|1288036	Yes
	Actinobacteria	Actinobacteria	Actinomycetales	Mycobacteriaceae	Mycobacterium	Mycobacterium neoaurum|700508	Yes
	Actinobacteria	Actinobacteria	Actinomycetales	Mycobacteriaceae	Mycobacterium	Mycobacterium orygis|1305739	Yes
	Actinobacteria	Actinobacteria	Actinomycetales	Mycobacteriaceae	Mycobacterium	Mycobacterium parascrofulaceum|525368	Yes
	Actinobacteria	Actinobacteria	Actinomycetales	Mycobacteriaceae	Mycobacterium	Mycobacterium phlei|1150599	Yes
	Actinobacteria	Actinobacteria	Actinomycetales	Mycobacteriaceae	Mycobacterium	Mycobacterium rhodesiae|710685	Yes
	Actinobacteria	Actinobacteria	Actinomycetales	Mycobacteriaceae	Mycobacterium	Mycobacterium rufum|318424	Yes
	Actinobacteria	Actinobacteria	Actinomycetales	Mycobacteriaceae	Mycobacterium	Mycobacterium smegmatis|710686	Yes
	Actinobacteria	Actinobacteria	Actinomycetales	Mycobacteriaceae	Mycobacterium	Mycobacterium sp. UM_WWY|1370121	Yes
	Actinobacteria	Actinobacteria	Actinomycetales	Mycobacteriaceae	Mycobacterium	Mycobacterium thermoresistibile|1078020	Yes
	Actinobacteria	Actinobacteria	Actinomycetales	Mycobacteriaceae	Mycobacterium	Mycobacterium triplex|47839	Yes
	Actinobacteria	Actinobacteria	Actinomycetales	Mycobacteriaceae	Mycobacterium	Mycobacterium tuberculosis|1306414	Yes
	Actinobacteria	Actinobacteria	Actinomycetales	Mycobacteriaceae	Mycobacterium	Mycobacterium tusciae|710687	Yes
	Actinobacteria	Actinobacteria	Actinomycetales	Mycobacteriaceae	Mycobacterium	Mycobacterium ulcerans|1299332	Yes
	Actinobacteria	Actinobacteria	Actinomycetales	Mycobacteriaceae	Mycobacterium	Mycobacterium vaccae|1194972	Yes
	Actinobacteria	Actinobacteria	Actinomycetales	Mycobacteriaceae	Mycobacterium	Mycobacterium vanbaalenii|350058	Yes
	Actinobacteria	Actinobacteria	Actinomycetales	Mycobacteriaceae	Mycobacterium	Mycobacterium vulneris|547163	Yes
	Actinobacteria	Actinobacteria	Actinomycetales	Mycobacteriaceae	Mycobacterium	Mycobacterium xenopi|1150591	Yes
	Actinobacteria	Actinobacteria	Actinomycetales	Mycobacteriaceae	Mycobacterium	Mycobacterium yongonense|1138871	Yes
	Actinobacteria	Actinobacteria	Actinomycetales	Nakamurellaceae	Nakamurella	Nakamurella lactea|1123241	Yes
	Actinobacteria	Actinobacteria	Actinomycetales	Nakamurellaceae	Nakamurella	Nakamurella multipartita|479431	Yes
	Actinobacteria	Actinobacteria	Actinomycetales	Nocardiaceae	Nocardia	Nocardia asteroides|1110697	Yes
	Actinobacteria	Actinobacteria	Actinomycetales	Nocardiaceae	Nocardia	Nocardia brasiliensis|1133849	Yes
	Actinobacteria	Actinobacteria	Actinomycetales	Nocardiaceae	Nocardia	Nocardia cyriacigeorgica|1127134	Yes
	Actinobacteria	Actinobacteria	Actinomycetales	Nocardiaceae	Nocardia	Nocardia farcinica|247156	Yes
	Actinobacteria	Actinobacteria	Actinomycetales	Nocardiaceae	Nocardia	Nocardia nova|1415166	Yes
	Actinobacteria	Actinobacteria	Actinomycetales	Nocardiaceae	Nocardia	Nocardia otitidiscaviarum|1406858	Yes
	Actinobacteria	Actinobacteria	Actinomycetales	Nocardiaceae	Nocardia	Nocardia rhamnosiphila|426716	Yes
	Actinobacteria	Actinobacteria	Actinomycetales	Nocardiaceae	Nocardia	Nocardia seriolae|37332	Yes
	Actinobacteria	Actinobacteria	Actinomycetales	Nocardiaceae	Nocardia	Nocardia sp. BMG111209|1160137	Yes
	Actinobacteria	Actinobacteria	Actinomycetales	Nocardiaceae	Rhodococcus	Rhodococcus defluvii|1323361	Yes
	Actinobacteria	Actinobacteria	Actinomycetales	Nocardiaceae	Rhodococcus	Rhodococcus erythropolis|1136179	Yes
	Actinobacteria	Actinobacteria	Actinomycetales	Nocardiaceae	Rhodococcus	Rhodococcus fascians|1443898	Yes
	Actinobacteria	Actinobacteria	Actinomycetales	Nocardiaceae	Rhodococcus	Rhodococcus hoagii|685727	Yes
	Actinobacteria	Actinobacteria	Actinomycetales	Nocardiaceae	Rhodococcus	Rhodococcus imtechensis|1165867	Yes
	Actinobacteria	Actinobacteria	Actinomycetales	Nocardiaceae	Rhodococcus	Rhodococcus jostii|101510	Yes
	Actinobacteria	Actinobacteria	Actinomycetales	Nocardiaceae	Rhodococcus	Rhodococcus opacus|632772	Yes
	Actinobacteria	Actinobacteria	Actinomycetales	Nocardiaceae	Rhodococcus	Rhodococcus pyridinivorans|1435356	Yes
	Actinobacteria	Actinobacteria	Actinomycetales	Nocardiaceae	Rhodococcus	Rhodococcus qingshengii|1278077	Yes
	Actinobacteria	Actinobacteria	Actinomycetales	Nocardiaceae	Rhodococcus	Rhodococcus rhodnii|1273125	Yes
	Actinobacteria	Actinobacteria	Actinomycetales	Nocardiaceae	Rhodococcus	Rhodococcus rhodochrous|1829	Yes
	Actinobacteria	Actinobacteria	Actinomycetales	Nocardiaceae	Rhodococcus	Rhodococcus ruber|1240349	Yes
	Actinobacteria	Actinobacteria	Actinomycetales	Nocardiaceae	Rhodococcus	Rhodococcus sp. JVH1|745408	Yes
	Actinobacteria	Actinobacteria	Actinomycetales	Nocardiaceae	Rhodococcus	Rhodococcus triatomae|1278078	Yes
	Actinobacteria	Actinobacteria	Actinomycetales	Nocardiaceae	Rhodococcus	Rhodococcus wratislaviensis|1195242	Yes
	Actinobacteria	Actinobacteria	Actinomycetales	Nocardiaceae	Smaragdicoccus	Smaragdicoccus niigatensis|1123258	Yes
	Actinobacteria	Actinobacteria	Actinomycetales	Nocardioidaceae	Actinopolymorpha	Actinopolymorpha alba|1120950	Yes
	Actinobacteria	Actinobacteria	Actinomycetales	Nocardioidaceae	Aeromicrobium	Aeromicrobium marinum|585531	Yes
	Actinobacteria	Actinobacteria	Actinomycetales	Nocardioidaceae	Kribbella	Kribbella catacumbae|1122138	Yes
	Actinobacteria	Actinobacteria	Actinomycetales	Nocardioidaceae	Kribbella	Kribbella flavida|479435	Yes
	Actinobacteria	Actinobacteria	Actinomycetales	Nocardioidaceae	Marmoricola	Marmoricola aequoreus|397278	Yes
	Actinobacteria	Actinobacteria	Actinomycetales	Nocardioidaceae	Marmoricola	Marmoricola sp. URHB0036|1298863	Yes
	Actinobacteria	Actinobacteria	Actinomycetales	Nocardioidaceae	Nocardioides	Nocardioides alkalitolerans|1122608	Yes
	Actinobacteria	Actinobacteria	Actinomycetales	Nocardioidaceae	Nocardioides	Nocardioides halotolerans|1122609	Yes
	Actinobacteria	Actinobacteria	Actinomycetales	Nocardioidaceae	Nocardioides	Nocardioides insulae|1122610	Yes
	Actinobacteria	Actinobacteria	Actinomycetales	Nocardioidaceae	Nocardioides	Nocardioides sp. JS614|196162	Yes
	Actinobacteria	Actinobacteria	Actinomycetales	Nocardioidaceae	Pimelobacter	Pimelobacter simplex|2045	Yes
	Actinobacteria	Actinobacteria	Actinomycetales	Nocardioidaceae	Propionicicella	Propionicicella superfundia|1122999	Yes
	Actinobacteria	Actinobacteria	Actinomycetales	Nocardioidaceae		Nocardioidaceae bacterium MUSC201|1348852	Yes
	Actinobacteria	Actinobacteria	Actinomycetales	Nocardiopsaceae	Nocardiopsis	Nocardiopsis alba|1205910	Yes
	Actinobacteria	Actinobacteria	Actinomycetales	Nocardiopsaceae	Nocardiopsis	Nocardiopsis alkaliphila|1246461	Yes
	Actinobacteria	Actinobacteria	Actinomycetales	Nocardiopsaceae	Nocardiopsis	Nocardiopsis baichengensis|1236902	Yes
	Actinobacteria	Actinobacteria	Actinomycetales	Nocardiopsaceae	Nocardiopsis	Nocardiopsis chromatogenes|1246475	Yes
	Actinobacteria	Actinobacteria	Actinomycetales	Nocardiopsaceae	Nocardiopsis	Nocardiopsis dassonvillei|446468	Yes
	Actinobacteria	Actinobacteria	Actinomycetales	Nocardiopsaceae	Nocardiopsis	Nocardiopsis ganjiahuensis|1237500	Yes
	Actinobacteria	Actinobacteria	Actinomycetales	Nocardiopsaceae	Nocardiopsis	Nocardiopsis gilva|1235441	Yes
	Actinobacteria	Actinobacteria	Actinomycetales	Nocardiopsaceae	Nocardiopsis	Nocardiopsis halophila|1245472	Yes
	Actinobacteria	Actinobacteria	Actinomycetales	Nocardiopsaceae	Nocardiopsis	Nocardiopsis halotolerans|1246444	Yes
	Actinobacteria	Actinobacteria	Actinomycetales	Nocardiopsaceae	Nocardiopsis	Nocardiopsis kunsanensis|1246445	Yes
	Actinobacteria	Actinobacteria	Actinomycetales	Nocardiopsaceae	Nocardiopsis	Nocardiopsis lucentensis|1246460	Yes
	Actinobacteria	Actinobacteria	Actinomycetales	Nocardiopsaceae	Nocardiopsis	Nocardiopsis potens|570268	Yes
	Actinobacteria	Actinobacteria	Actinomycetales	Nocardiopsaceae	Nocardiopsis	Nocardiopsis prasina|1245475	Yes
	Actinobacteria	Actinobacteria	Actinomycetales	Nocardiopsaceae	Nocardiopsis	Nocardiopsis salina|1246485	Yes
	Actinobacteria	Actinobacteria	Actinomycetales	Nocardiopsaceae	Nocardiopsis	Nocardiopsis sp. CNS639|1169153	Yes
	Actinobacteria	Actinobacteria	Actinomycetales	Nocardiopsaceae	Nocardiopsis	Nocardiopsis synnemataformans|1245476	Yes
	Actinobacteria	Actinobacteria	Actinomycetales	Nocardiopsaceae	Nocardiopsis	Nocardiopsis valliformis|1246448	Yes
	Actinobacteria	Actinobacteria	Actinomycetales	Nocardiopsaceae	Nocardiopsis	Nocardiopsis xinjiangensis|1246474	Yes
	Actinobacteria	Actinobacteria	Actinomycetales	Nocardiopsaceae	Thermobifida	Thermobifida fusca|1169414	Yes
	Actinobacteria	Actinobacteria	Actinomycetales	Promicromonosporaceae	Cellulosimicrobium	Cellulosimicrobium cellulans|935839	Yes
	Actinobacteria	Actinobacteria	Actinomycetales	Promicromonosporaceae	Cellulosimicrobium	Cellulosimicrobium sp. MM|1523621	Yes
	Actinobacteria	Actinobacteria	Actinomycetales	Promicromonosporaceae	Isoptericola	Isoptericola variabilis|743718	Yes
	Actinobacteria	Actinobacteria	Actinomycetales	Promicromonosporaceae	Promicromonospora	Promicromonospora sukumoe|1172178	Yes
	Actinobacteria	Actinobacteria	Actinomycetales	Promicromonosporaceae	Xylanimonas	Xylanimonas cellulosilytica|446471	Yes
	Actinobacteria	Actinobacteria	Actinomycetales	Propionibacteriaceae	Aestuariimicrobium	Aestuariimicrobium kwangyangense|1120954	Yes
	Actinobacteria	Actinobacteria	Actinomycetales	Propionibacteriaceae	Microlunatus	Microlunatus phosphovorus|1032480	Yes
	Actinobacteria	Actinobacteria	Actinomycetales	Propionibacteriaceae	Propionibacterium	Propionibacterium acidifaciens|1122994	Yes
	Actinobacteria	Actinobacteria	Actinomycetales	Propionibacteriaceae	Propionibacterium	Propionibacterium acidipropionici|1171373	Yes
	Actinobacteria	Actinobacteria	Actinomycetales	Propionibacteriaceae	Propionibacterium	Propionibacterium acnes|1271528	Yes
	Actinobacteria	Actinobacteria	Actinomycetales	Propionibacteriaceae	Propionibacterium	Propionibacterium avidum|1292372	Yes
	Actinobacteria	Actinobacteria	Actinomycetales	Propionibacteriaceae	Propionibacterium	Propionibacterium freudenreichii|754252	Yes
	Actinobacteria	Actinobacteria	Actinomycetales	Propionibacteriaceae	Propionibacterium	Propionibacterium granulosum|1292373	Yes
	Actinobacteria	Actinobacteria	Actinomycetales	Propionibacteriaceae	Propionibacterium	Propionibacterium humerusii|999892	Yes
	Actinobacteria	Actinobacteria	Actinomycetales	Propionibacteriaceae	Propionibacterium	Propionibacterium jensenii|1122997	Yes
	Actinobacteria	Actinobacteria	Actinomycetales	Propionibacteriaceae	Propionibacterium	Propionibacterium propionicum|767029	Yes
	Actinobacteria	Actinobacteria	Actinomycetales	Propionibacteriaceae	Propionibacterium	Propionibacterium sp. oral taxon 192|1203605	Yes
	Actinobacteria	Actinobacteria	Actinomycetales	Propionibacteriaceae	Propionibacterium	Propionibacterium thoenii|1122998	Yes
	Actinobacteria	Actinobacteria	Actinomycetales	Propionibacteriaceae	Propionimicrobium	Propionimicrobium lymphophilum|1123001	Yes
	Actinobacteria	Actinobacteria	Actinomycetales	Propionibacteriaceae	Propionimicrobium	Propionimicrobium sp. BV2F7|1111131	Yes
	Actinobacteria	Actinobacteria	Actinomycetales	Propionibacteriaceae		Granulicoccus phenolivorans|1121933	Yes
	Actinobacteria	Actinobacteria	Actinomycetales	Propionibacteriaceae		Propionibacteriaceae bacterium P6A17|1410634	Yes
	Actinobacteria	Actinobacteria	Actinomycetales	Pseudonocardiaceae	Actinoalloteichus	Actinoalloteichus cyanogriseus|65497	Yes
	Actinobacteria	Actinobacteria	Actinomycetales	Pseudonocardiaceae	Actinoalloteichus	Actinoalloteichus spitiensis|1114962	Yes
	Actinobacteria	Actinobacteria	Actinomycetales	Pseudonocardiaceae	Actinokineospora	Actinokineospora enzanensis|1120934	Yes
	Actinobacteria	Actinobacteria	Actinomycetales	Pseudonocardiaceae	Actinokineospora	Actinokineospora inagensis|1120935	Yes
	Actinobacteria	Actinobacteria	Actinomycetales	Pseudonocardiaceae	Actinokineospora	Actinokineospora sp. EG49|909613	Yes
	Actinobacteria	Actinobacteria	Actinomycetales	Pseudonocardiaceae	Actinomycetospora	Actinomycetospora chiangmaiensis|1120948	Yes
	Actinobacteria	Actinobacteria	Actinomycetales	Pseudonocardiaceae	Actinosynnema	Actinosynnema mirum|446462	Yes
	Actinobacteria	Actinobacteria	Actinomycetales	Pseudonocardiaceae	Allokutzneria	Allokutzneria albata|211114	Yes
	Actinobacteria	Actinobacteria	Actinomycetales	Pseudonocardiaceae	Amycolatopsis	Amycolatopsis alba|1125972	Yes
	Actinobacteria	Actinobacteria	Actinomycetales	Pseudonocardiaceae	Amycolatopsis	Amycolatopsis azurea|1238180	Yes
	Actinobacteria	Actinobacteria	Actinomycetales	Pseudonocardiaceae	Amycolatopsis	Amycolatopsis balhimycina|1089545	Yes
	Actinobacteria	Actinobacteria	Actinomycetales	Pseudonocardiaceae	Amycolatopsis	Amycolatopsis benzoatilytica|1089544	Yes
	Actinobacteria	Actinobacteria	Actinomycetales	Pseudonocardiaceae	Amycolatopsis	Amycolatopsis decaplanina|1284240	Yes
	Actinobacteria	Actinobacteria	Actinomycetales	Pseudonocardiaceae	Amycolatopsis	Amycolatopsis japonica|208439	Yes
	Actinobacteria	Actinobacteria	Actinomycetales	Pseudonocardiaceae	Amycolatopsis	Amycolatopsis jejuensis|330084	Yes
	Actinobacteria	Actinobacteria	Actinomycetales	Pseudonocardiaceae	Amycolatopsis	Amycolatopsis lurida|1460371	Yes
	Actinobacteria	Actinobacteria	Actinomycetales	Pseudonocardiaceae	Amycolatopsis	Amycolatopsis mediterranei|1221524	Yes
	Actinobacteria	Actinobacteria	Actinomycetales	Pseudonocardiaceae	Amycolatopsis	Amycolatopsis methanolica|1068978	Yes
	Actinobacteria	Actinobacteria	Actinomycetales	Pseudonocardiaceae	Amycolatopsis	Amycolatopsis nigrescens|1068980	Yes
	Actinobacteria	Actinobacteria	Actinomycetales	Pseudonocardiaceae	Amycolatopsis	Amycolatopsis orientalis|1156913	Yes
	Actinobacteria	Actinobacteria	Actinomycetales	Pseudonocardiaceae	Amycolatopsis	Amycolatopsis rifamycinica|287986	Yes
	Actinobacteria	Actinobacteria	Actinomycetales	Pseudonocardiaceae	Amycolatopsis	Amycolatopsis sp. ATCC 39116|385957	Yes
	Actinobacteria	Actinobacteria	Actinomycetales	Pseudonocardiaceae	Amycolatopsis	Amycolatopsis taiwanensis|1120984	Yes
	Actinobacteria	Actinobacteria	Actinomycetales	Pseudonocardiaceae	Amycolatopsis	Amycolatopsis thermoflava|1068979	Yes
	Actinobacteria	Actinobacteria	Actinomycetales	Pseudonocardiaceae	Amycolatopsis	Amycolatopsis vancoresmycina|208444	Yes
	Actinobacteria	Actinobacteria	Actinomycetales	Pseudonocardiaceae	Kibdelosporangium	Kibdelosporangium aridum|145996	Yes
	Actinobacteria	Actinobacteria	Actinomycetales	Pseudonocardiaceae	Kutzneria	Kutzneria albida|43357	Yes
	Actinobacteria	Actinobacteria	Actinomycetales	Pseudonocardiaceae	Kutzneria	Kutzneria sp. 744|345341	Yes
	Actinobacteria	Actinobacteria	Actinomycetales	Pseudonocardiaceae	Lechevalieria	Lechevalieria aerocolonigenes|68170	Yes
	Actinobacteria	Actinobacteria	Actinomycetales	Pseudonocardiaceae	Lentzea	Lentzea albidocapillata|40571	Yes
	Actinobacteria	Actinobacteria	Actinomycetales	Pseudonocardiaceae	Prauserella	Prauserella rugosa|43354	Yes
	Actinobacteria	Actinobacteria	Actinomycetales	Pseudonocardiaceae	Pseudonocardia	Pseudonocardia acaciae|1123023	Yes
	Actinobacteria	Actinobacteria	Actinomycetales	Pseudonocardiaceae	Pseudonocardia	Pseudonocardia asaccharolytica|1123024	Yes
	Actinobacteria	Actinobacteria	Actinomycetales	Pseudonocardiaceae	Pseudonocardia	Pseudonocardia dioxanivorans|675635	Yes
	Actinobacteria	Actinobacteria	Actinomycetales	Pseudonocardiaceae	Pseudonocardia	Pseudonocardia sp. P1|761194	Yes
	Actinobacteria	Actinobacteria	Actinomycetales	Pseudonocardiaceae	Pseudonocardia	Pseudonocardia spinosispora|1123025	Yes
	Actinobacteria	Actinobacteria	Actinomycetales	Pseudonocardiaceae	Saccharomonospora	Saccharomonospora azurea|1114959	Yes
	Actinobacteria	Actinobacteria	Actinomycetales	Pseudonocardiaceae	Saccharomonospora	Saccharomonospora cyanea|882082	Yes
	Actinobacteria	Actinobacteria	Actinomycetales	Pseudonocardiaceae	Saccharomonospora	Saccharomonospora glauca|928724	Yes
	Actinobacteria	Actinobacteria	Actinomycetales	Pseudonocardiaceae	Saccharomonospora	Saccharomonospora halophila|928729	Yes
	Actinobacteria	Actinobacteria	Actinomycetales	Pseudonocardiaceae	Saccharomonospora	Saccharomonospora marina|882083	Yes
	Actinobacteria	Actinobacteria	Actinomycetales	Pseudonocardiaceae	Saccharomonospora	Saccharomonospora paurometabolica|882084	Yes
	Actinobacteria	Actinobacteria	Actinomycetales	Pseudonocardiaceae	Saccharomonospora	Saccharomonospora saliphila|882085	Yes
	Actinobacteria	Actinobacteria	Actinomycetales	Pseudonocardiaceae	Saccharomonospora	Saccharomonospora sp. CNQ490|1137271	Yes
	Actinobacteria	Actinobacteria	Actinomycetales	Pseudonocardiaceae	Saccharomonospora	Saccharomonospora viridis|1852	Yes
	Actinobacteria	Actinobacteria	Actinomycetales	Pseudonocardiaceae	Saccharomonospora	Saccharomonospora xinjiangensis|882086	Yes
	Actinobacteria	Actinobacteria	Actinomycetales	Pseudonocardiaceae	Saccharopolyspora	Saccharopolyspora erythraea|1382595	Yes
	Actinobacteria	Actinobacteria	Actinomycetales	Pseudonocardiaceae	Saccharopolyspora	Saccharopolyspora rectivirgula|1283279	Yes
	Actinobacteria	Actinobacteria	Actinomycetales	Pseudonocardiaceae	Saccharopolyspora	Saccharopolyspora spinosa|994479	Yes
	Actinobacteria	Actinobacteria	Actinomycetales	Pseudonocardiaceae	Saccharothrix	Saccharothrix espanaensis|1179773	Yes
	Actinobacteria	Actinobacteria	Actinomycetales	Pseudonocardiaceae	Saccharothrix	Saccharothrix sp. NRRL B-16314|1463825	Yes
	Actinobacteria	Actinobacteria	Actinomycetales	Pseudonocardiaceae	Saccharothrix	Saccharothrix syringae|103733	Yes
	Actinobacteria	Actinobacteria	Actinomycetales	Pseudonocardiaceae	Sciscionella	Sciscionella marina|1123244	Yes
	Actinobacteria	Actinobacteria	Actinomycetales	Pseudonocardiaceae	Sciscionella	Sciscionella sp. SE31|1445613	Yes
	Actinobacteria	Actinobacteria	Actinomycetales	Pseudonocardiaceae	Thermobispora	Thermobispora bispora|469371	Yes
	Actinobacteria	Actinobacteria	Actinomycetales	Pseudonocardiaceae	Thermocrispum	Thermocrispum agreste|1111738	Yes
	Actinobacteria	Actinobacteria	Actinomycetales	Pseudonocardiaceae	Thermocrispum	Thermocrispum municipale|1111737	Yes
	Actinobacteria	Actinobacteria	Actinomycetales	Ruaniaceae	Ruania	Ruania albidiflava|1123065	Yes
	Actinobacteria	Actinobacteria	Actinomycetales	Sanguibacteraceae	Sanguibacter	Sanguibacter keddieii|446469	Yes
	Actinobacteria	Actinobacteria	Actinomycetales	Segniliparaceae	Segniliparus	Segniliparus rugosus|679197	Yes
	Actinobacteria	Actinobacteria	Actinomycetales	Sporichthyaceae	Sporichthya	Sporichthya polymorpha|1048339	Yes
	Actinobacteria	Actinobacteria	Actinomycetales	Streptomycetaceae	Kitasatospora	Kitasatospora cheerisanensis|1348663	Yes
	Actinobacteria	Actinobacteria	Actinomycetales	Streptomycetaceae	Kitasatospora	Kitasatospora phosalacinea|2065	Yes
	Actinobacteria	Actinobacteria	Actinomycetales	Streptomycetaceae	Kitasatospora	Kitasatospora setae|452652	Yes
	Actinobacteria	Actinobacteria	Actinomycetales	Streptomycetaceae	Kitasatospora	Kitasatospora sp. MBT63|1444768	Yes
	Actinobacteria	Actinobacteria	Actinomycetales	Streptomycetaceae	Streptacidiphilus	Streptacidiphilus jeojiense|436229	Yes
	Actinobacteria	Actinobacteria	Actinomycetales	Streptomycetaceae	Streptomyces	[Kitasatospora] papulosa|1464011	Yes
	Actinobacteria	Actinobacteria	Actinomycetales	Streptomycetaceae	Streptomyces	Streptomyces achromogenes|67256	Yes
	Actinobacteria	Actinobacteria	Actinomycetales	Streptomycetaceae	Streptomyces	Streptomyces acidiscabies|1116232	Yes
	Actinobacteria	Actinobacteria	Actinomycetales	Streptomycetaceae	Streptomyces	Streptomyces afghaniensis|1283301	Yes
	Actinobacteria	Actinobacteria	Actinomycetales	Streptomycetaceae	Streptomyces	Streptomyces albidoflavus|1886	Yes
	Actinobacteria	Actinobacteria	Actinomycetales	Streptomycetaceae	Streptomyces	Streptomyces alboflavus|67267	Yes
	Actinobacteria	Actinobacteria	Actinomycetales	Streptomycetaceae	Streptomyces	Streptomyces alboviridis|67269	Yes
	Actinobacteria	Actinobacteria	Actinomycetales	Streptomycetaceae	Streptomyces	Streptomyces albulus|1316445	Yes
	Actinobacteria	Actinobacteria	Actinomycetales	Streptomycetaceae	Streptomyces	Streptomyces albus|457425	Yes
	Actinobacteria	Actinobacteria	Actinomycetales	Streptomycetaceae	Streptomyces	Streptomyces anulatus|1892	Yes
	Actinobacteria	Actinobacteria	Actinomycetales	Streptomycetaceae	Streptomyces	Streptomyces aurantiacus|1286094	Yes
	Actinobacteria	Actinobacteria	Actinomycetales	Streptomycetaceae	Streptomyces	Streptomyces auratus|1160718	Yes
	Actinobacteria	Actinobacteria	Actinomycetales	Streptomycetaceae	Streptomyces	Streptomyces aureocirculatus|67275	Yes
	Actinobacteria	Actinobacteria	Actinomycetales	Streptomycetaceae	Streptomyces	Streptomyces aureofaciens|1894	Yes
	Actinobacteria	Actinobacteria	Actinomycetales	Streptomycetaceae	Streptomyces	Streptomyces avellaneus|68178	Yes
	Actinobacteria	Actinobacteria	Actinomycetales	Streptomycetaceae	Streptomyces	Streptomyces avermitilis|227882	Yes
	Actinobacteria	Actinobacteria	Actinomycetales	Streptomycetaceae	Streptomyces	Streptomyces baarnensis|66872	Yes
	Actinobacteria	Actinobacteria	Actinomycetales	Streptomycetaceae	Streptomyces	Streptomyces bicolor|66874	Yes
	Actinobacteria	Actinobacteria	Actinomycetales	Streptomycetaceae	Streptomyces	Streptomyces bikiniensis|1896	Yes
	Actinobacteria	Actinobacteria	Actinomycetales	Streptomycetaceae	Streptomyces	Streptomyces bingchenggensis|749414	Yes
	Actinobacteria	Actinobacteria	Actinomycetales	Streptomycetaceae	Streptomyces	Streptomyces bottropensis|1054862	Yes
	Actinobacteria	Actinobacteria	Actinomycetales	Streptomycetaceae	Streptomyces	Streptomyces brasiliensis|1954	Yes
	Actinobacteria	Actinobacteria	Actinomycetales	Streptomycetaceae	Streptomyces	Streptomyces californicus|67281	Yes
	Actinobacteria	Actinobacteria	Actinomycetales	Streptomycetaceae	Streptomyces	Streptomyces canus|1172183	Yes
	Actinobacteria	Actinobacteria	Actinomycetales	Streptomycetaceae	Streptomyces	Streptomyces capuensis|1464056	Yes
	Actinobacteria	Actinobacteria	Actinomycetales	Streptomycetaceae	Streptomyces	Streptomyces carneus|1464061	Yes
	Actinobacteria	Actinobacteria	Actinomycetales	Streptomycetaceae	Streptomyces	Streptomyces catenulae|66875	Yes
	Actinobacteria	Actinobacteria	Actinomycetales	Streptomycetaceae	Streptomyces	Streptomyces cattleya|1003195	Yes
	Actinobacteria	Actinobacteria	Actinomycetales	Streptomycetaceae	Streptomyces	Streptomyces cellulosae|1968	Yes
	Actinobacteria	Actinobacteria	Actinomycetales	Streptomycetaceae	Streptomyces	Streptomyces chartreusis|1079986	Yes
	Actinobacteria	Actinobacteria	Actinomycetales	Streptomycetaceae	Streptomyces	Streptomyces clavuligerus|443255	Yes
	Actinobacteria	Actinobacteria	Actinomycetales	Streptomycetaceae	Streptomyces	Streptomyces coelicoflavus|1120227	Yes
	Actinobacteria	Actinobacteria	Actinomycetales	Streptomycetaceae	Streptomyces	Streptomyces coelicolor|100226	Yes
	Actinobacteria	Actinobacteria	Actinomycetales	Streptomycetaceae	Streptomyces	Streptomyces collinus|1214242	Yes
	Actinobacteria	Actinobacteria	Actinomycetales	Streptomycetaceae	Streptomyces	Streptomyces cyaneofuscatus|66883	Yes
	Actinobacteria	Actinobacteria	Actinomycetales	Streptomycetaceae	Streptomyces	Streptomyces davawensis|1214101	Yes
	Actinobacteria	Actinobacteria	Actinomycetales	Streptomycetaceae	Streptomyces	Streptomyces decoyicus|249567	Yes
	Actinobacteria	Actinobacteria	Actinomycetales	Streptomycetaceae	Streptomyces	Streptomyces durhamensis|68194	Yes
	Actinobacteria	Actinobacteria	Actinomycetales	Streptomycetaceae	Streptomyces	Streptomyces erythrochromogenes|285574	Yes
	Actinobacteria	Actinobacteria	Actinomycetales	Streptomycetaceae	Streptomyces	Streptomyces exfoliatus|1905	Yes
	Actinobacteria	Actinobacteria	Actinomycetales	Streptomycetaceae	Streptomyces	Streptomyces filamentosus|457430	Yes
	Actinobacteria	Actinobacteria	Actinomycetales	Streptomycetaceae	Streptomyces	Streptomyces flaveus|66370	Yes
	Actinobacteria	Actinobacteria	Actinomycetales	Streptomycetaceae	Streptomyces	Streptomyces flavidovirens|1123319	Yes
	Actinobacteria	Actinobacteria	Actinomycetales	Streptomycetaceae	Streptomyces	Streptomyces flavochromogenes|68199	Yes
	Actinobacteria	Actinobacteria	Actinomycetales	Streptomycetaceae	Streptomyces	Streptomyces flavotricini|66888	Yes
	Actinobacteria	Actinobacteria	Actinomycetales	Streptomycetaceae	Streptomyces	Streptomyces flavovariabilis|284031	Yes
	Actinobacteria	Actinobacteria	Actinomycetales	Streptomycetaceae	Streptomyces	Streptomyces flavovirens|52258	Yes
	Actinobacteria	Actinobacteria	Actinomycetales	Streptomycetaceae	Streptomyces	Streptomyces floridae|68201	Yes
	Actinobacteria	Actinobacteria	Actinomycetales	Streptomycetaceae	Streptomyces	Streptomyces fradiae|1906	Yes
	Actinobacteria	Actinobacteria	Actinomycetales	Streptomycetaceae	Streptomyces	Streptomyces fulvissimus|1303692	Yes
	Actinobacteria	Actinobacteria	Actinomycetales	Streptomycetaceae	Streptomyces	Streptomyces fulvoviolaceus|285535	Yes
	Actinobacteria	Actinobacteria	Actinomycetales	Streptomycetaceae	Streptomyces	Streptomyces fulvoviridis|66891	Yes
	Actinobacteria	Actinobacteria	Actinomycetales	Streptomycetaceae	Streptomyces	Streptomyces galbus|33898	Yes
	Actinobacteria	Actinobacteria	Actinomycetales	Streptomycetaceae	Streptomyces	Streptomyces gancidicus|1284664	Yes
	Actinobacteria	Actinobacteria	Actinomycetales	Streptomycetaceae	Streptomyces	Streptomyces ghanaensis|566461	Yes
	Actinobacteria	Actinobacteria	Actinomycetales	Streptomycetaceae	Streptomyces	Streptomyces glaucescens|1907	Yes
	Actinobacteria	Actinobacteria	Actinomycetales	Streptomycetaceae	Streptomyces	Streptomyces globisporus|66858	Yes
	Actinobacteria	Actinobacteria	Actinomycetales	Streptomycetaceae	Streptomyces	Streptomyces graminis|1464081	Yes
	Actinobacteria	Actinobacteria	Actinomycetales	Streptomycetaceae	Streptomyces	Streptomyces griseoaurantiacus|996637	Yes
	Actinobacteria	Actinobacteria	Actinomycetales	Streptomycetaceae	Streptomyces	Streptomyces griseoflavus|467200	Yes
	Actinobacteria	Actinobacteria	Actinomycetales	Streptomycetaceae	Streptomyces	Streptomyces griseolus|1909	Yes
	Actinobacteria	Actinobacteria	Actinomycetales	Streptomycetaceae	Streptomyces	Streptomyces griseoluteus|29306	Yes
	Actinobacteria	Actinobacteria	Actinomycetales	Streptomycetaceae	Streptomyces	Streptomyces griseorubens|66897	Yes
	Actinobacteria	Actinobacteria	Actinomycetales	Streptomycetaceae	Streptomyces	Streptomyces griseus|649189	Yes
	Actinobacteria	Actinobacteria	Actinomycetales	Streptomycetaceae	Streptomyces	Streptomyces halstedii|1944	Yes
	Actinobacteria	Actinobacteria	Actinomycetales	Streptomycetaceae	Streptomyces	Streptomyces himastatinicus|457427	Yes
	Actinobacteria	Actinobacteria	Actinomycetales	Streptomycetaceae	Streptomyces	Streptomyces hygroscopicus|68042	Yes
	Actinobacteria	Actinobacteria	Actinomycetales	Streptomycetaceae	Streptomyces	Streptomyces iakyrus|68219	Yes
	Actinobacteria	Actinobacteria	Actinomycetales	Streptomycetaceae	Streptomyces	Streptomyces ipomoeae|698759	Yes
	Actinobacteria	Actinobacteria	Actinomycetales	Streptomycetaceae	Streptomyces	Streptomyces katrae|68223	Yes
	Actinobacteria	Actinobacteria	Actinomycetales	Streptomycetaceae	Streptomyces	Streptomyces lavendulae|1914	Yes
	Actinobacteria	Actinobacteria	Actinomycetales	Streptomycetaceae	Streptomyces	Streptomyces lavenduligriseus|67315	Yes
	Actinobacteria	Actinobacteria	Actinomycetales	Streptomycetaceae	Streptomyces	Streptomyces lividans|1200984	Yes
	Actinobacteria	Actinobacteria	Actinomycetales	Streptomycetaceae	Streptomyces	Streptomyces lydicus|47763	Yes
	Actinobacteria	Actinobacteria	Actinomycetales	Streptomycetaceae	Streptomyces	Streptomyces mediolani|68237	Yes
	Actinobacteria	Actinobacteria	Actinomycetales	Streptomycetaceae	Streptomyces	Streptomyces megasporus|44060	Yes
	Actinobacteria	Actinobacteria	Actinomycetales	Streptomycetaceae	Streptomyces	Streptomyces mobaraensis|1223523	Yes
	Actinobacteria	Actinobacteria	Actinomycetales	Streptomycetaceae	Streptomyces	Streptomyces monomycini|371720	Yes
	Actinobacteria	Actinobacteria	Actinomycetales	Streptomycetaceae	Streptomyces	Streptomyces mutabilis|67332	Yes
	Actinobacteria	Actinobacteria	Actinomycetales	Streptomycetaceae	Streptomyces	Streptomyces natalensis|68242	Yes
	Actinobacteria	Actinobacteria	Actinomycetales	Streptomycetaceae	Streptomyces	Streptomyces niveus|1352941	Yes
	Actinobacteria	Actinobacteria	Actinomycetales	Streptomycetaceae	Streptomyces	Streptomyces novaecaesareae|68244	Yes
	Actinobacteria	Actinobacteria	Actinomycetales	Streptomycetaceae	Streptomyces	Streptomyces ochraceiscleroticus|47761	Yes
	Actinobacteria	Actinobacteria	Actinomycetales	Streptomycetaceae	Streptomyces	Streptomyces olindensis|358823	Yes
	Actinobacteria	Actinobacteria	Actinomycetales	Streptomycetaceae	Streptomyces	Streptomyces olivaceus|47716	Yes
	Actinobacteria	Actinobacteria	Actinomycetales	Streptomycetaceae	Streptomyces	Streptomyces peruviensis|68253	Yes
	Actinobacteria	Actinobacteria	Actinomycetales	Streptomycetaceae	Streptomyces	Streptomyces peucetius|1950	Yes
	Actinobacteria	Actinobacteria	Actinomycetales	Streptomycetaceae	Streptomyces	Streptomyces pratensis|591167	Yes
	Actinobacteria	Actinobacteria	Actinomycetales	Streptomycetaceae	Streptomyces	Streptomyces pristinaespiralis|457429	Yes
	Actinobacteria	Actinobacteria	Actinomycetales	Streptomycetaceae	Streptomyces	Streptomyces prunicolor|1312234	Yes
	Actinobacteria	Actinobacteria	Actinomycetales	Streptomycetaceae	Streptomyces	Streptomyces puniceus|67351	Yes
	Actinobacteria	Actinobacteria	Actinomycetales	Streptomycetaceae	Streptomyces	Streptomyces purpeochromogenes|1464077	Yes
	Actinobacteria	Actinobacteria	Actinomycetales	Streptomycetaceae	Streptomyces	Streptomyces purpeofuscus|67352	Yes
	Actinobacteria	Actinobacteria	Actinomycetales	Streptomycetaceae	Streptomyces	Streptomyces purpureus|1054860	Yes
	Actinobacteria	Actinobacteria	Actinomycetales	Streptomycetaceae	Streptomyces	Streptomyces pyridomyceticus|68260	Yes
	Actinobacteria	Actinobacteria	Actinomycetales	Streptomycetaceae	Streptomyces	Streptomyces rapamycinicus|1343740	Yes
	Actinobacteria	Actinobacteria	Actinomycetales	Streptomycetaceae	Streptomyces	Streptomyces resistomycificus|67356	Yes
	Actinobacteria	Actinobacteria	Actinomycetales	Streptomycetaceae	Streptomyces	Streptomyces rimosus|1927	Yes
	Actinobacteria	Actinobacteria	Actinomycetales	Streptomycetaceae	Streptomyces	Streptomyces roseochromogenus|1352936	Yes
	Actinobacteria	Actinobacteria	Actinomycetales	Streptomycetaceae	Streptomyces	Streptomyces roseoverticillatus|66429	Yes
	Actinobacteria	Actinobacteria	Actinomycetales	Streptomycetaceae	Streptomyces	Streptomyces ruber|83378	Yes
	Actinobacteria	Actinobacteria	Actinomycetales	Streptomycetaceae	Streptomyces	Streptomyces scabiei|680198	Yes
	Actinobacteria	Actinobacteria	Actinomycetales	Streptomycetaceae	Streptomyces	Streptomyces scabrisporus|1123320	Yes
	Actinobacteria	Actinobacteria	Actinomycetales	Streptomycetaceae	Streptomyces	Streptomyces sclerotialus|1957	Yes
	Actinobacteria	Actinobacteria	Actinomycetales	Streptomycetaceae	Streptomyces	Streptomyces scopuliridis|1440053	Yes
	Actinobacteria	Actinobacteria	Actinomycetales	Streptomycetaceae	Streptomyces	Streptomyces seoulensis|73044	Yes
	Actinobacteria	Actinobacteria	Actinomycetales	Streptomycetaceae	Streptomyces	Streptomyces somaliensis|1134445	Yes
	Actinobacteria	Actinobacteria	Actinomycetales	Streptomycetaceae	Streptomyces	Streptomyces sp. NRRL WC-3683|1463928	Yes
	Actinobacteria	Actinobacteria	Actinomycetales	Streptomycetaceae	Streptomyces	Streptomyces sulphureus|1123321	Yes
	Actinobacteria	Actinobacteria	Actinomycetales	Streptomycetaceae	Streptomyces	Streptomyces sviceus|463191	Yes
	Actinobacteria	Actinobacteria	Actinomycetales	Streptomycetaceae	Streptomyces	Streptomyces thermolilacinus|1306406	Yes
	Actinobacteria	Actinobacteria	Actinomycetales	Streptomycetaceae	Streptomyces	Streptomyces toyocaensis|55952	Yes
	Actinobacteria	Actinobacteria	Actinomycetales	Streptomycetaceae	Streptomyces	Streptomyces tsukubaensis|1114943	Yes
	Actinobacteria	Actinobacteria	Actinomycetales	Streptomycetaceae	Streptomyces	Streptomyces turgidiscabies|698760	Yes
	Actinobacteria	Actinobacteria	Actinomycetales	Streptomycetaceae	Streptomyces	Streptomyces varsoviensis|67373	Yes
	Actinobacteria	Actinobacteria	Actinomycetales	Streptomycetaceae	Streptomyces	Streptomyces venezuelae|953739	Yes
	Actinobacteria	Actinobacteria	Actinomycetales	Streptomycetaceae	Streptomyces	Streptomyces violaceoruber|1935	Yes
	Actinobacteria	Actinobacteria	Actinomycetales	Streptomycetaceae	Streptomyces	Streptomyces violaceorubidus|284042	Yes
	Actinobacteria	Actinobacteria	Actinomycetales	Streptomycetaceae	Streptomyces	Streptomyces violaceusniger|653045	Yes
	Actinobacteria	Actinobacteria	Actinomycetales	Streptomycetaceae	Streptomyces	Streptomyces violens|66377	Yes
	Actinobacteria	Actinobacteria	Actinomycetales	Streptomycetaceae	Streptomyces	Streptomyces virginiae|1961	Yes
	Actinobacteria	Actinobacteria	Actinomycetales	Streptomycetaceae	Streptomyces	Streptomyces viridochromogenes|1160705	Yes
	Actinobacteria	Actinobacteria	Actinomycetales	Streptomycetaceae	Streptomyces	Streptomyces viridosporus|665577	Yes
	Actinobacteria	Actinobacteria	Actinomycetales	Streptomycetaceae	Streptomyces	Streptomyces vitaminophilus|1123322	Yes
	Actinobacteria	Actinobacteria	Actinomycetales	Streptomycetaceae	Streptomyces	Streptomyces wadayamensis|141454	Yes
	Actinobacteria	Actinobacteria	Actinomycetales	Streptomycetaceae	Streptomyces	Streptomyces wedmorensis|43759	Yes
	Actinobacteria	Actinobacteria	Actinomycetales	Streptomycetaceae	Streptomyces	Streptomyces xanthophaeus|67385	Yes
	Actinobacteria	Actinobacteria	Actinomycetales	Streptomycetaceae	Streptomyces	Streptomyces yerevanensis|66378	Yes
	Actinobacteria	Actinobacteria	Actinomycetales	Streptomycetaceae	Streptomyces	Streptomyces zinciresistens|700597	Yes
	Actinobacteria	Actinobacteria	Actinomycetales	Streptomycetaceae		Streptomycetaceae bacterium MP113-05|1380770	Yes
	Actinobacteria	Actinobacteria	Actinomycetales	Streptosporangiaceae	Herbidospora	Herbidospora cretacea|28444	Yes
	Actinobacteria	Actinobacteria	Actinomycetales	Streptosporangiaceae	Microbispora	Microbispora rosea|1464078	Yes
	Actinobacteria	Actinobacteria	Actinomycetales	Streptosporangiaceae	Microbispora	Microbispora sp. ATCC PTA-5024|316330	Yes
	Actinobacteria	Actinobacteria	Actinomycetales	Streptosporangiaceae	Microtetraspora	Microtetraspora glauca|1996	Yes
	Actinobacteria	Actinobacteria	Actinomycetales	Streptosporangiaceae	Nonomuraea	Nonomuraea coxensis|1122611	Yes
	Actinobacteria	Actinobacteria	Actinomycetales	Streptosporangiaceae	Streptosporangium	Streptosporangium amethystogenes|2002	Yes
	Actinobacteria	Actinobacteria	Actinomycetales	Streptosporangiaceae	Streptosporangium	Streptosporangium roseum|2001	Yes
	Actinobacteria	Actinobacteria	Actinomycetales	Thermomonosporaceae	Actinomadura	Actinomadura atramentaria|1120936	Yes
	Actinobacteria	Actinobacteria	Actinomycetales	Thermomonosporaceae	Actinomadura	Actinomadura flavalba|561175	Yes
	Actinobacteria	Actinobacteria	Actinomycetales	Thermomonosporaceae	Actinomadura	Actinomadura madurae|1394178	Yes
	Actinobacteria	Actinobacteria	Actinomycetales	Thermomonosporaceae	Actinomadura	Actinomadura oligospora|1399798	Yes
	Actinobacteria	Actinobacteria	Actinomycetales	Thermomonosporaceae	Actinomadura	Actinomadura rifamycini|1120937	Yes
	Actinobacteria	Actinobacteria	Actinomycetales	Thermomonosporaceae	Spirillospora	Spirillospora albida|58123	Yes
	Actinobacteria	Actinobacteria	Actinomycetales	Thermomonosporaceae	Thermomonospora	Thermomonospora curvata|471852	Yes
	Actinobacteria	Actinobacteria	Actinomycetales	Tsukamurellaceae	Tsukamurella	Tsukamurella paurometabola|521096	Yes
	Actinobacteria	Actinobacteria	Actinomycetales	Williamsiaceae	Williamsia	Williamsia sp. D3|1313067	Yes
	Actinobacteria	Actinobacteria	Actinomycetales		Candidatus Ancillula	Candidatus Ancillula trichonymphae|1265510	Yes
	Actinobacteria	Actinobacteria	Actinomycetales		Tomitella	Tomitella biformata|1448389	Yes
	Actinobacteria	Actinobacteria	Bifidobacteriales	Bifidobacteriaceae	Alloscardovia	Alloscardovia omnicolens|1321816	Yes
	Actinobacteria	Actinobacteria	Bifidobacteriales	Bifidobacteriaceae	Bifidobacterium	Bifidobacterium actinocoloniiforme|1437605	Yes
	Actinobacteria	Actinobacteria	Bifidobacteriales	Bifidobacteriaceae	Bifidobacterium	Bifidobacterium adolescentis|411481	Yes
	Actinobacteria	Actinobacteria	Bifidobacteriales	Bifidobacteriaceae	Bifidobacterium	Bifidobacterium angulatum|518635	Yes
	Actinobacteria	Actinobacteria	Bifidobacteriales	Bifidobacteriaceae	Bifidobacterium	Bifidobacterium animalis|911598	Yes
	Actinobacteria	Actinobacteria	Bifidobacteriales	Bifidobacteriaceae	Bifidobacterium	Bifidobacterium asteroides|1437594	Yes
	Actinobacteria	Actinobacteria	Bifidobacteriales	Bifidobacteriaceae	Bifidobacterium	Bifidobacterium biavatii|1437608	Yes
	Actinobacteria	Actinobacteria	Bifidobacteriales	Bifidobacteriaceae	Bifidobacterium	Bifidobacterium bifidum|500634	Yes
	Actinobacteria	Actinobacteria	Bifidobacteriales	Bifidobacteriaceae	Bifidobacterium	Bifidobacterium bohemicum|1437606	Yes
	Actinobacteria	Actinobacteria	Bifidobacteriales	Bifidobacteriaceae	Bifidobacterium	Bifidobacterium bombi|1341695	Yes
	Actinobacteria	Actinobacteria	Bifidobacteriales	Bifidobacteriaceae	Bifidobacterium	Bifidobacterium boum|1410645	Yes
	Actinobacteria	Actinobacteria	Bifidobacteriales	Bifidobacteriaceae	Bifidobacterium	Bifidobacterium breve|1685	Yes
	Actinobacteria	Actinobacteria	Bifidobacteriales	Bifidobacteriaceae	Bifidobacterium	Bifidobacterium callitrichos|1437609	Yes
	Actinobacteria	Actinobacteria	Bifidobacteriales	Bifidobacteriaceae	Bifidobacterium	Bifidobacterium catenulatum|566552	Yes
	Actinobacteria	Actinobacteria	Bifidobacteriales	Bifidobacteriaceae	Bifidobacterium	Bifidobacterium choerinum|1121107	Yes
	Actinobacteria	Actinobacteria	Bifidobacteriales	Bifidobacteriaceae	Bifidobacterium	Bifidobacterium coryneforme|1437599	Yes
	Actinobacteria	Actinobacteria	Bifidobacteriales	Bifidobacteriaceae	Bifidobacterium	Bifidobacterium cuniculi|1437601	Yes
	Actinobacteria	Actinobacteria	Bifidobacteriales	Bifidobacteriaceae	Bifidobacterium	Bifidobacterium dentium|1150423	Yes
	Actinobacteria	Actinobacteria	Bifidobacteriales	Bifidobacteriaceae	Bifidobacterium	Bifidobacterium gallicum|561180	Yes
	Actinobacteria	Actinobacteria	Bifidobacteriales	Bifidobacteriaceae	Bifidobacterium	Bifidobacterium gallinarum|1437602	Yes
	Actinobacteria	Actinobacteria	Bifidobacteriales	Bifidobacteriaceae	Bifidobacterium	Bifidobacterium indicum|1341694	Yes
	Actinobacteria	Actinobacteria	Bifidobacteriales	Bifidobacteriaceae	Bifidobacterium	Bifidobacterium kashiwanohense|1150460	Yes
	Actinobacteria	Actinobacteria	Bifidobacteriales	Bifidobacteriaceae	Bifidobacterium	Bifidobacterium longum|1437597	Yes
	Actinobacteria	Actinobacteria	Bifidobacteriales	Bifidobacteriaceae	Bifidobacterium	Bifidobacterium magnum|1121108	Yes
	Actinobacteria	Actinobacteria	Bifidobacteriales	Bifidobacteriaceae	Bifidobacterium	Bifidobacterium merycicum|1410646	Yes
	Actinobacteria	Actinobacteria	Bifidobacteriales	Bifidobacteriaceae	Bifidobacterium	Bifidobacterium minimum|1121109	Yes
	Actinobacteria	Actinobacteria	Bifidobacteriales	Bifidobacteriaceae	Bifidobacterium	Bifidobacterium mongoliense|1437603	Yes
	Actinobacteria	Actinobacteria	Bifidobacteriales	Bifidobacteriaceae	Bifidobacterium	Bifidobacterium moukalabense|1435051	Yes
	Actinobacteria	Actinobacteria	Bifidobacteriales	Bifidobacteriaceae	Bifidobacterium	Bifidobacterium pseudocatenulatum|547043	Yes
	Actinobacteria	Actinobacteria	Bifidobacteriales	Bifidobacteriaceae	Bifidobacterium	Bifidobacterium pseudolongum|1280701	Yes
	Actinobacteria	Actinobacteria	Bifidobacteriales	Bifidobacteriaceae	Bifidobacterium	Bifidobacterium psychraerophilum|1435464	Yes
	Actinobacteria	Actinobacteria	Bifidobacteriales	Bifidobacteriaceae	Bifidobacterium	Bifidobacterium pullorum|1437600	Yes
	Actinobacteria	Actinobacteria	Bifidobacteriales	Bifidobacteriaceae	Bifidobacterium	Bifidobacterium reuteri|1437610	Yes
	Actinobacteria	Actinobacteria	Bifidobacteriales	Bifidobacteriaceae	Bifidobacterium	Bifidobacterium ruminantium|1410647	Yes
	Actinobacteria	Actinobacteria	Bifidobacteriales	Bifidobacteriaceae	Bifidobacterium	Bifidobacterium saeculare|1437611	Yes
	Actinobacteria	Actinobacteria	Bifidobacteriales	Bifidobacteriaceae	Bifidobacterium	Bifidobacterium saguini|1437607	Yes
	Actinobacteria	Actinobacteria	Bifidobacteriales	Bifidobacteriaceae	Bifidobacterium	Bifidobacterium scardovii|1150461	Yes
	Actinobacteria	Actinobacteria	Bifidobacteriales	Bifidobacteriaceae	Bifidobacterium	Bifidobacterium sp. MSTE12|1161409	Yes
	Actinobacteria	Actinobacteria	Bifidobacteriales	Bifidobacteriaceae	Bifidobacterium	Bifidobacterium stellenboschense|762211	Yes
	Actinobacteria	Actinobacteria	Bifidobacteriales	Bifidobacteriaceae	Bifidobacterium	Bifidobacterium stercoris|1437612	Yes
	Actinobacteria	Actinobacteria	Bifidobacteriales	Bifidobacteriaceae	Bifidobacterium	Bifidobacterium subtile|1121110	Yes
	Actinobacteria	Actinobacteria	Bifidobacteriales	Bifidobacteriaceae	Bifidobacterium	Bifidobacterium thermacidophilum|1435463	Yes
	Actinobacteria	Actinobacteria	Bifidobacteriales	Bifidobacteriaceae	Bifidobacterium	Bifidobacterium thermophilum|1437596	Yes
	Actinobacteria	Actinobacteria	Bifidobacteriales	Bifidobacteriaceae	Bifidobacterium	Bifidobacterium tsurumiense|1121112	Yes
	Actinobacteria	Actinobacteria	Bifidobacteriales	Bifidobacteriaceae	Gardnerella	Gardnerella vaginalis|907262	Yes
	Actinobacteria	Actinobacteria	Bifidobacteriales	Bifidobacteriaceae	Metascardovia	Metascardovia criceti|1122228	Yes
	Actinobacteria	Actinobacteria	Bifidobacteriales	Bifidobacteriaceae	Parascardovia	Parascardovia denticolens|1193128	Yes
	Actinobacteria	Actinobacteria	Bifidobacteriales	Bifidobacteriaceae	Scardovia	Scardovia inopinata|641146	Yes
	Actinobacteria	Actinobacteria	Bifidobacteriales	Bifidobacteriaceae	Scardovia	Scardovia wiggsiae|857290	Yes
	Actinobacteria	Actinobacteria	Coriobacteriales	Coriobacteriaceae	Adlercreutzia	Adlercreutzia equolifaciens|1384484	Yes
	Actinobacteria	Actinobacteria	Coriobacteriales	Coriobacteriaceae	Atopobium	Atopobium fossor|1121023	Yes
	Actinobacteria	Actinobacteria	Coriobacteriales	Coriobacteriaceae	Atopobium	Atopobium minutum|997872	Yes
	Actinobacteria	Actinobacteria	Coriobacteriales	Coriobacteriaceae	Atopobium	Atopobium parvulum|521095	Yes
	Actinobacteria	Actinobacteria	Coriobacteriales	Coriobacteriaceae	Atopobium	Atopobium rimae|553184	Yes
	Actinobacteria	Actinobacteria	Coriobacteriales	Coriobacteriaceae	Atopobium	Atopobium sp. ICM58|1105030	Yes
	Actinobacteria	Actinobacteria	Coriobacteriales	Coriobacteriaceae	Atopobium	Atopobium vaginae|525256	Yes
	Actinobacteria	Actinobacteria	Coriobacteriales	Coriobacteriaceae	Collinsella	Collinsella aerofaciens|411903	Yes
	Actinobacteria	Actinobacteria	Coriobacteriales	Coriobacteriaceae	Collinsella	Collinsella intestinalis|521003	Yes
	Actinobacteria	Actinobacteria	Coriobacteriales	Coriobacteriaceae	Collinsella	Collinsella sp. 4_8_47FAA|742722	Yes
	Actinobacteria	Actinobacteria	Coriobacteriales	Coriobacteriaceae	Collinsella	Collinsella stercoris|445975	Yes
	Actinobacteria	Actinobacteria	Coriobacteriales	Coriobacteriaceae	Collinsella	Collinsella tanakaei|742742	Yes
	Actinobacteria	Actinobacteria	Coriobacteriales	Coriobacteriaceae	Coriobacterium	Coriobacterium glomerans|700015	Yes
	Actinobacteria	Actinobacteria	Coriobacteriales	Coriobacteriaceae	Cryptobacterium	Cryptobacterium curtum|469378	Yes
	Actinobacteria	Actinobacteria	Coriobacteriales	Coriobacteriaceae	Eggerthella	Eggerthella lenta|742768	Yes
	Actinobacteria	Actinobacteria	Coriobacteriales	Coriobacteriaceae	Eggerthella	Eggerthella sp. 1_3_56FAA|665943	Yes
	Actinobacteria	Actinobacteria	Coriobacteriales	Coriobacteriaceae	Enterorhabdus	Enterorhabdus caecimuris|1235794	Yes
	Actinobacteria	Actinobacteria	Coriobacteriales	Coriobacteriaceae	Enterorhabdus	Enterorhabdus mucosicola|1121866	Yes
	Actinobacteria	Actinobacteria	Coriobacteriales	Coriobacteriaceae	Gordonibacter	Gordonibacter pamelaeae|657308	Yes
	Actinobacteria	Actinobacteria	Coriobacteriales	Coriobacteriaceae	Olsenella	Olsenella profusa|1125712	Yes
	Actinobacteria	Actinobacteria	Coriobacteriales	Coriobacteriaceae	Olsenella	Olsenella sp. oral taxon 809|661087	Yes
	Actinobacteria	Actinobacteria	Coriobacteriales	Coriobacteriaceae	Olsenella	Olsenella uli|1190621	Yes
	Actinobacteria	Actinobacteria	Coriobacteriales	Coriobacteriaceae	Slackia	Slackia exigua|649764	Yes
	Actinobacteria	Actinobacteria	Coriobacteriales	Coriobacteriaceae	Slackia	Slackia heliotrinireducens|471855	Yes
	Actinobacteria	Actinobacteria	Coriobacteriales	Coriobacteriaceae	Slackia	Slackia piriformis|742818	Yes
	Actinobacteria	Actinobacteria	Coriobacteriales	Coriobacteriaceae	Slackia	Slackia sp. CM382|1111137	Yes
	Actinobacteria	Actinobacteria	Coriobacteriales	Coriobacteriaceae		Coriobacteriaceae bacterium GD5|1232436	Yes
	Actinobacteria	Actinobacteria	Rubrobacterales	Rubrobacteraceae	Rubrobacter	Rubrobacter radiotolerans|42256	Yes
	Actinobacteria	Actinobacteria	Rubrobacterales	Rubrobacteraceae	Rubrobacter	Rubrobacter xylanophilus|266117	Yes
	Actinobacteria	Actinobacteria	Solirubrobacterales	Conexibacteraceae	Conexibacter	Conexibacter woesei|469383	Yes
	Actinobacteria	Actinobacteria	Solirubrobacterales	Patulibacteraceae	Patulibacter	Patulibacter americanus|1122939	Yes
	Actinobacteria	Actinobacteria	Solirubrobacterales	Patulibacteraceae	Patulibacter	Patulibacter medicamentivorans|1097667	Yes
	Actinobacteria	Actinobacteria	Solirubrobacterales	Patulibacteraceae	Patulibacter	Patulibacter minatonensis|929712	Yes
	Actinobacteria	Actinobacteria	Solirubrobacterales	Solirubrobacteraceae	Solirubrobacter	Solirubrobacter soli|1123262	Yes
	Actinobacteria	Actinobacteria	Solirubrobacterales	Solirubrobacteraceae	Solirubrobacter	Solirubrobacter sp. URHD0082|1298857	Yes
	Actinobacteria	Actinobacteria	Solirubrobacterales			Solirubrobacterales bacterium URHD0059|1380390	Yes
	Actinobacteria	Actinobacteria			Candidatus Microthrix	Candidatus Microthrix parvicella|1231054	Yes
	Actinobacteria	Actinobacteria				actinobacterium acAcidi|1504320	Yes
	Actinobacteria	Actinobacteria				actinobacterium acAMD-5|1504319	Yes
	Actinobacteria	Actinobacteria				actinobacterium acIB-AMD-7|1504322	Yes
	Actinobacteria	Actinobacteria				actinobacterium acMicro-4|1504317	Yes
	Actinobacteria	Actinobacteria				actinobacterium LLX17|1229203	Yes
	Actinobacteria	Actinobacteria				actinobacterium SCGC AAA041-L13|932042	Yes
	Actinobacteria	Actinobacteria				marine actinobacterium PHSC20C1|312284	Yes
	Aminicenantes				Candidatus Aminicenans	Candidatus Aminicenans sakinawicola|1383028	Yes
	Aminicenantes					Aminicenantes bacterium SCGC AAA252-A02|1047013	Yes
	Aquificae	Aquificae	Aquificales	Aquificaceae	Aquifex	Aquifex aeolicus|224324	Yes
	Aquificae	Aquificae	Aquificales	Aquificaceae	Hydrogenivirga	Hydrogenivirga sp. 128-5-R1-1|392423	Yes
	Aquificae	Aquificae	Aquificales	Aquificaceae	Hydrogenobacter	Hydrogenobacter thermophilus|608538	Yes
	Aquificae	Aquificae	Aquificales	Aquificaceae	Hydrogenobaculum	Hydrogenobaculum sp. Y04AAS1|380749	Yes
	Aquificae	Aquificae	Aquificales	Aquificaceae	Thermocrinis	Thermocrinis albus|638303	Yes
	Aquificae	Aquificae	Aquificales	Aquificaceae	Thermocrinis	Thermocrinis ruber|75906	Yes
	Aquificae	Aquificae	Aquificales	Aquificaceae	Thermocrinis	Thermocrinis sp. GBS|1313265	Yes
	Aquificae	Aquificae	Aquificales	Hydrogenothermaceae	Persephonella	Persephonella marina|123214	Yes
	Aquificae	Aquificae	Aquificales	Hydrogenothermaceae	Persephonella	Persephonella sp. KM09-Lau-8|1158345	Yes
	Aquificae	Aquificae	Aquificales	Hydrogenothermaceae	Sulfurihydrogenibium	Sulfurihydrogenibium azorense|204536	Yes
	Aquificae	Aquificae	Aquificales	Hydrogenothermaceae	Sulfurihydrogenibium	Sulfurihydrogenibium sp. YO3AOP1|436114	Yes
	Aquificae	Aquificae	Aquificales	Hydrogenothermaceae	Sulfurihydrogenibium	Sulfurihydrogenibium subterraneum|1123325	Yes
	Aquificae	Aquificae	Aquificales	Hydrogenothermaceae	Sulfurihydrogenibium	Sulfurihydrogenibium yellowstonense|432331	Yes
	Aquificae	Aquificae	Desulfurobacteriales	Desulfurobacteriaceae	Desulfurobacterium	Desulfurobacterium sp. TC5-1|1158318	Yes
	Aquificae	Aquificae	Desulfurobacteriales	Desulfurobacteriaceae	Desulfurobacterium	Desulfurobacterium thermolithotrophum|868864	Yes
	Aquificae	Aquificae	Desulfurobacteriales	Desulfurobacteriaceae	Thermovibrio	Thermovibrio ammonificans|648996	Yes
	Armatimonadetes	Chthonomonadetes	Chthonomonadales	Chthonomonadaceae	Chthonomonas	Chthonomonas calidirosea|1303518	Yes
	Armatimonadetes				Fimbriimonas	Fimbriimonas ginsengisoli|661478	Yes
	Atribacteria				Candidatus Caldatribacteirum	Candidatus Caldatribacterium saccharofermentans|1262132	Yes
	Bacteroidetes	Bacteroidia	Bacteroidales	Bacteroidaceae	Bacteroides	Bacteroides acidifaciens|1235814	Yes
	Bacteroidetes	Bacteroidia	Bacteroidales	Bacteroidaceae	Bacteroides	Bacteroides barnesiae|1121094	Yes
	Bacteroidetes	Bacteroidia	Bacteroidales	Bacteroidaceae	Bacteroides	Bacteroides caccae|997873	Yes
	Bacteroidetes	Bacteroidia	Bacteroidales	Bacteroidaceae	Bacteroides	Bacteroides cellulosilyticus|1268240	Yes
	Bacteroidetes	Bacteroidia	Bacteroidales	Bacteroidaceae	Bacteroides	Bacteroides clarus|762984	Yes
	Bacteroidetes	Bacteroidia	Bacteroidales	Bacteroidaceae	Bacteroides	Bacteroides coprocola|470145	Yes
	Bacteroidetes	Bacteroidia	Bacteroidales	Bacteroidaceae	Bacteroides	Bacteroides coprophilus|547042	Yes
	Bacteroidetes	Bacteroidia	Bacteroidales	Bacteroidaceae	Bacteroides	Bacteroides coprosuis|679937	Yes
	Bacteroidetes	Bacteroidia	Bacteroidales	Bacteroidaceae	Bacteroides	Bacteroides dorei|483217	Yes
	Bacteroidetes	Bacteroidia	Bacteroidales	Bacteroidaceae	Bacteroides	Bacteroides eggerthii|665953	Yes
	Bacteroidetes	Bacteroidia	Bacteroidales	Bacteroidaceae	Bacteroides	Bacteroides faecichinchillae|1236513	Yes
	Bacteroidetes	Bacteroidia	Bacteroidales	Bacteroidaceae	Bacteroides	Bacteroides faecis|1077285	Yes
	Bacteroidetes	Bacteroidia	Bacteroidales	Bacteroidaceae	Bacteroides	Bacteroides finegoldii|997888	Yes
	Bacteroidetes	Bacteroidia	Bacteroidales	Bacteroidaceae	Bacteroides	Bacteroides fluxus|763034	Yes
	Bacteroidetes	Bacteroidia	Bacteroidales	Bacteroidaceae	Bacteroides	Bacteroides fragilis|862962	Yes
	Bacteroidetes	Bacteroidia	Bacteroidales	Bacteroidaceae	Bacteroides	Bacteroides gallinarum|1121096	Yes
	Bacteroidetes	Bacteroidia	Bacteroidales	Bacteroidaceae	Bacteroides	Bacteroides graminisolvens|1121097	Yes
	Bacteroidetes	Bacteroidia	Bacteroidales	Bacteroidaceae	Bacteroides	Bacteroides helcogenes|693979	Yes
	Bacteroidetes	Bacteroidia	Bacteroidales	Bacteroidaceae	Bacteroides	Bacteroides intestinalis|471870	Yes
	Bacteroidetes	Bacteroidia	Bacteroidales	Bacteroidaceae	Bacteroides	Bacteroides massiliensis|1235788	Yes
	Bacteroidetes	Bacteroidia	Bacteroidales	Bacteroidaceae	Bacteroides	Bacteroides oleiciplenus|742727	Yes
	Bacteroidetes	Bacteroidia	Bacteroidales	Bacteroidaceae	Bacteroides	Bacteroides ovatus|411476	Yes
	Bacteroidetes	Bacteroidia	Bacteroidales	Bacteroidaceae	Bacteroides	Bacteroides paurosaccharolyticus|1236498	Yes
	Bacteroidetes	Bacteroidia	Bacteroidales	Bacteroidaceae	Bacteroides	Bacteroides plebeius|484018	Yes
	Bacteroidetes	Bacteroidia	Bacteroidales	Bacteroidaceae	Bacteroides	Bacteroides propionicifaciens|1121099	Yes
	Bacteroidetes	Bacteroidia	Bacteroidales	Bacteroidaceae	Bacteroides	Bacteroides pyogenes|1121100	Yes
	Bacteroidetes	Bacteroidia	Bacteroidales	Bacteroidaceae	Bacteroides	Bacteroides reticulotermitis|1445607	Yes
	Bacteroidetes	Bacteroidia	Bacteroidales	Bacteroidaceae	Bacteroides	Bacteroides salanitronis|667015	Yes
	Bacteroidetes	Bacteroidia	Bacteroidales	Bacteroidaceae	Bacteroides	Bacteroides salyersiae|1121101	Yes
	Bacteroidetes	Bacteroidia	Bacteroidales	Bacteroidaceae	Bacteroides	Bacteroides sartorii|1236538	Yes
	Bacteroidetes	Bacteroidia	Bacteroidales	Bacteroidaceae	Bacteroides	Bacteroides sp. 2_2_4|469590	Yes
	Bacteroidetes	Bacteroidia	Bacteroidales	Bacteroidaceae	Bacteroides	Bacteroides stercorirosoris|1236514	Yes
	Bacteroidetes	Bacteroidia	Bacteroidales	Bacteroidaceae	Bacteroides	Bacteroides stercoris|1073351	Yes
	Bacteroidetes	Bacteroidia	Bacteroidales	Bacteroidaceae	Bacteroides	Bacteroides thetaiotaomicron|1235785	Yes
	Bacteroidetes	Bacteroidia	Bacteroidales	Bacteroidaceae	Bacteroides	Bacteroides uniformis|1235787	Yes
	Bacteroidetes	Bacteroidia	Bacteroidales	Bacteroidaceae	Bacteroides	Bacteroides vulgatus|435590	Yes
	Bacteroidetes	Bacteroidia	Bacteroidales	Bacteroidaceae	Bacteroides	Bacteroides xylanisolvens|657309	Yes
	Bacteroidetes	Bacteroidia	Bacteroidales	Draconibacteriaceae	Draconibacterium	Draconibacterium orientale|1168034	Yes
	Bacteroidetes	Bacteroidia	Bacteroidales	Marinilabiliaceae	Alkaliflexus	Alkaliflexus imshenetskii|927658	Yes
	Bacteroidetes	Bacteroidia	Bacteroidales	Marinilabiliaceae	Anaerophaga	Anaerophaga thermohalophila|1144273	Yes
	Bacteroidetes	Bacteroidia	Bacteroidales	Marinilabiliaceae	Marinilabilia	Marinilabilia salmonicolor|1168289	Yes
	Bacteroidetes	Bacteroidia	Bacteroidales	Marinilabiliaceae	Thermophagus	Thermophagus xiamenensis|385682	Yes
	Bacteroidetes	Bacteroidia	Bacteroidales	Porphyromonadaceae	Barnesiella	Barnesiella intestinihominis|742726	Yes
	Bacteroidetes	Bacteroidia	Bacteroidales	Porphyromonadaceae	Barnesiella	Barnesiella viscericola|880074	Yes
	Bacteroidetes	Bacteroidia	Bacteroidales	Porphyromonadaceae	Butyricimonas	Butyricimonas synergistica|1121129	Yes
	Bacteroidetes	Bacteroidia	Bacteroidales	Porphyromonadaceae	Butyricimonas	Butyricimonas virosa|1121130	Yes
	Bacteroidetes	Bacteroidia	Bacteroidales	Porphyromonadaceae	Coprobacter	Coprobacter fastidiosus|1349822	Yes
	Bacteroidetes	Bacteroidia	Bacteroidales	Porphyromonadaceae	Dysgonomonas	Dysgonomonas capnocytophagoides|1121485	Yes
	Bacteroidetes	Bacteroidia	Bacteroidales	Porphyromonadaceae	Dysgonomonas	Dysgonomonas gadei|742766	Yes
	Bacteroidetes	Bacteroidia	Bacteroidales	Porphyromonadaceae	Dysgonomonas	Dysgonomonas mossii|742767	Yes
	Bacteroidetes	Bacteroidia	Bacteroidales	Porphyromonadaceae	Odoribacter	Odoribacter laneus|742817	Yes
	Bacteroidetes	Bacteroidia	Bacteroidales	Porphyromonadaceae	Odoribacter	Odoribacter splanchnicus|709991	Yes
	Bacteroidetes	Bacteroidia	Bacteroidales	Porphyromonadaceae	Paludibacter	Paludibacter propionicigenes|694427	Yes
	Bacteroidetes	Bacteroidia	Bacteroidales	Porphyromonadaceae	Parabacteroides	Parabacteroides distasonis|999416	Yes
	Bacteroidetes	Bacteroidia	Bacteroidales	Porphyromonadaceae	Parabacteroides	Parabacteroides goldsteinii|1235789	Yes
	Bacteroidetes	Bacteroidia	Bacteroidales	Porphyromonadaceae	Parabacteroides	Parabacteroides gordonii|1122931	Yes
	Bacteroidetes	Bacteroidia	Bacteroidales	Porphyromonadaceae	Parabacteroides	Parabacteroides johnsonii|999419	Yes
	Bacteroidetes	Bacteroidia	Bacteroidales	Porphyromonadaceae	Parabacteroides	Parabacteroides merdae|999421	Yes
	Bacteroidetes	Bacteroidia	Bacteroidales	Porphyromonadaceae	Parabacteroides	Parabacteroides sp. ASF519|1235803	Yes
	Bacteroidetes	Bacteroidia	Bacteroidales	Porphyromonadaceae	Porphyromonas	Porphyromonas asaccharolytica|910312	Yes
	Bacteroidetes	Bacteroidia	Bacteroidales	Porphyromonadaceae	Porphyromonas	Porphyromonas bennonis|1122971	Yes
	Bacteroidetes	Bacteroidia	Bacteroidales	Porphyromonadaceae	Porphyromonas	Porphyromonas cangingivalis|1236520	Yes
	Bacteroidetes	Bacteroidia	Bacteroidales	Porphyromonadaceae	Porphyromonas	Porphyromonas canoris|36875	Yes
	Bacteroidetes	Bacteroidia	Bacteroidales	Porphyromonadaceae	Porphyromonas	Porphyromonas cansulci|1305618	Yes
	Bacteroidetes	Bacteroidia	Bacteroidales	Porphyromonadaceae	Porphyromonas	Porphyromonas catoniae|1127696	Yes
	Bacteroidetes	Bacteroidia	Bacteroidales	Porphyromonadaceae	Porphyromonas	Porphyromonas crevioricanis|1305617	Yes
	Bacteroidetes	Bacteroidia	Bacteroidales	Porphyromonadaceae	Porphyromonas	Porphyromonas endodontalis|553175	Yes
	Bacteroidetes	Bacteroidia	Bacteroidales	Porphyromonadaceae	Porphyromonas	Porphyromonas gingivalis|1211023	Yes
	Bacteroidetes	Bacteroidia	Bacteroidales	Porphyromonadaceae	Porphyromonas	Porphyromonas gingivicanis|1236526	Yes
	Bacteroidetes	Bacteroidia	Bacteroidales	Porphyromonadaceae	Porphyromonas	Porphyromonas gulae|1122972	Yes
	Bacteroidetes	Bacteroidia	Bacteroidales	Porphyromonadaceae	Porphyromonas	Porphyromonas levii|1122973	Yes
	Bacteroidetes	Bacteroidia	Bacteroidales	Porphyromonadaceae	Porphyromonas	Porphyromonas somerae|1122975	Yes
	Bacteroidetes	Bacteroidia	Bacteroidales	Porphyromonadaceae	Porphyromonas	Porphyromonas sp. 31_2|658663	Yes
	Bacteroidetes	Bacteroidia	Bacteroidales	Porphyromonadaceae	Porphyromonas	Porphyromonas uenonis|1122976	Yes
	Bacteroidetes	Bacteroidia	Bacteroidales	Porphyromonadaceae	Proteiniphilum	Proteiniphilum acetatigenes|1123008	Yes
	Bacteroidetes	Bacteroidia	Bacteroidales	Porphyromonadaceae	Tannerella	Tannerella sp. 6_1_58FAA_CT1|665949	Yes
	Bacteroidetes	Bacteroidia	Bacteroidales	Porphyromonadaceae		Porphyromonadaceae COT-184_OH4590|1517682	Yes
	Bacteroidetes	Bacteroidia	Bacteroidales	Prevotellaceae	Alloprevotella	Alloprevotella rava|679199	Yes
	Bacteroidetes	Bacteroidia	Bacteroidales	Prevotellaceae	Alloprevotella	Alloprevotella tannerae|626522	Yes
	Bacteroidetes	Bacteroidia	Bacteroidales	Prevotellaceae	Hallella	Hallella seregens|1336250	Yes
	Bacteroidetes	Bacteroidia	Bacteroidales	Prevotellaceae	Paraprevotella	Paraprevotella clara|762968	Yes
	Bacteroidetes	Bacteroidia	Bacteroidales	Prevotellaceae	Paraprevotella	Paraprevotella xylaniphila|762982	Yes
	Bacteroidetes	Bacteroidia	Bacteroidales	Prevotellaceae	Prevotella	Prevotella albensis|1122978	Yes
	Bacteroidetes	Bacteroidia	Bacteroidales	Prevotellaceae	Prevotella	Prevotella amnii|1122979	Yes
	Bacteroidetes	Bacteroidia	Bacteroidales	Prevotellaceae	Prevotella	Prevotella aurantiaca|1236508	Yes
	Bacteroidetes	Bacteroidia	Bacteroidales	Prevotellaceae	Prevotella	Prevotella baroniae|1122980	Yes
	Bacteroidetes	Bacteroidia	Bacteroidales	Prevotellaceae	Prevotella	Prevotella bergensis|585502	Yes
	Bacteroidetes	Bacteroidia	Bacteroidales	Prevotellaceae	Prevotella	Prevotella bivia|868129	Yes
	Bacteroidetes	Bacteroidia	Bacteroidales	Prevotellaceae	Prevotella	Prevotella brevis|1410666	Yes
	Bacteroidetes	Bacteroidia	Bacteroidales	Prevotellaceae	Prevotella	Prevotella bryantii|1280705	Yes
	Bacteroidetes	Bacteroidia	Bacteroidales	Prevotellaceae	Prevotella	Prevotella buccae|575611	Yes
	Bacteroidetes	Bacteroidia	Bacteroidales	Prevotellaceae	Prevotella	Prevotella buccalis|679190	Yes
	Bacteroidetes	Bacteroidia	Bacteroidales	Prevotellaceae	Prevotella	Prevotella copri|537011	Yes
	Bacteroidetes	Bacteroidia	Bacteroidales	Prevotellaceae	Prevotella	Prevotella corporis|1122981	Yes
	Bacteroidetes	Bacteroidia	Bacteroidales	Prevotellaceae	Prevotella	Prevotella dentalis|908937	Yes
	Bacteroidetes	Bacteroidia	Bacteroidales	Prevotellaceae	Prevotella	Prevotella dentasini|1236509	Yes
	Bacteroidetes	Bacteroidia	Bacteroidales	Prevotellaceae	Prevotella	Prevotella disiens|1235811	Yes
	Bacteroidetes	Bacteroidia	Bacteroidales	Prevotellaceae	Prevotella	Prevotella enoeca|1235815	Yes
	Bacteroidetes	Bacteroidia	Bacteroidales	Prevotellaceae	Prevotella	Prevotella falsenii|1122983	Yes
	Bacteroidetes	Bacteroidia	Bacteroidales	Prevotellaceae	Prevotella	Prevotella fusca|1236517	Yes
	Bacteroidetes	Bacteroidia	Bacteroidales	Prevotellaceae	Prevotella	Prevotella histicola|1236504	Yes
	Bacteroidetes	Bacteroidia	Bacteroidales	Prevotellaceae	Prevotella	Prevotella intermedia|1122984	Yes
	Bacteroidetes	Bacteroidia	Bacteroidales	Prevotellaceae	Prevotella	Prevotella loescheii|1122985	Yes
	Bacteroidetes	Bacteroidia	Bacteroidales	Prevotellaceae	Prevotella	Prevotella maculosa|1122986	Yes
	Bacteroidetes	Bacteroidia	Bacteroidales	Prevotellaceae	Prevotella	Prevotella marshii|862515	Yes
	Bacteroidetes	Bacteroidia	Bacteroidales	Prevotellaceae	Prevotella	Prevotella melaninogenica|575612	Yes
	Bacteroidetes	Bacteroidia	Bacteroidales	Prevotellaceae	Prevotella	Prevotella micans|1122987	Yes
	Bacteroidetes	Bacteroidia	Bacteroidales	Prevotellaceae	Prevotella	Prevotella multiformis|888743	Yes
	Bacteroidetes	Bacteroidia	Bacteroidales	Prevotellaceae	Prevotella	Prevotella multisaccharivorax|688246	Yes
	Bacteroidetes	Bacteroidia	Bacteroidales	Prevotellaceae	Prevotella	Prevotella nanceiensis|1122988	Yes
	Bacteroidetes	Bacteroidia	Bacteroidales	Prevotellaceae	Prevotella	Prevotella nigrescens|702439	Yes
	Bacteroidetes	Bacteroidia	Bacteroidales	Prevotellaceae	Prevotella	Prevotella oralis|1073367	Yes
	Bacteroidetes	Bacteroidia	Bacteroidales	Prevotellaceae	Prevotella	Prevotella oris|1122989	Yes
	Bacteroidetes	Bacteroidia	Bacteroidales	Prevotellaceae	Prevotella	Prevotella oulorum|1236497	Yes
	Bacteroidetes	Bacteroidia	Bacteroidales	Prevotellaceae	Prevotella	Prevotella pallens|997353	Yes
	Bacteroidetes	Bacteroidia	Bacteroidales	Prevotellaceae	Prevotella	Prevotella paludivivens|1122990	Yes
	Bacteroidetes	Bacteroidia	Bacteroidales	Prevotellaceae	Prevotella	Prevotella ruminicola|1410667	Yes
	Bacteroidetes	Bacteroidia	Bacteroidales	Prevotellaceae	Prevotella	Prevotella saccharolytica|1236516	Yes
	Bacteroidetes	Bacteroidia	Bacteroidales	Prevotellaceae	Prevotella	Prevotella salivae|1395125	Yes
	Bacteroidetes	Bacteroidia	Bacteroidales	Prevotellaceae	Prevotella	Prevotella scopos|1236518	Yes
	Bacteroidetes	Bacteroidia	Bacteroidales	Prevotellaceae	Prevotella	Prevotella shahii|1122991	Yes
	Bacteroidetes	Bacteroidia	Bacteroidales	Prevotellaceae	Prevotella	Prevotella sp. 10(H)|1158294	Yes
	Bacteroidetes	Bacteroidia	Bacteroidales	Prevotellaceae	Prevotella	Prevotella stercorea|1002367	Yes
	Bacteroidetes	Bacteroidia	Bacteroidales	Prevotellaceae	Prevotella	Prevotella timonensis|1122992	Yes
	Bacteroidetes	Bacteroidia	Bacteroidales	Rikenellaceae	Alistipes	Alistipes finegoldii|679935	Yes
	Bacteroidetes	Bacteroidia	Bacteroidales	Rikenellaceae	Alistipes	Alistipes indistinctus|742725	Yes
	Bacteroidetes	Bacteroidia	Bacteroidales	Rikenellaceae	Alistipes	Alistipes onderdonkii|1203611	Yes
	Bacteroidetes	Bacteroidia	Bacteroidales	Rikenellaceae	Alistipes	Alistipes putredinis|445970	Yes
	Bacteroidetes	Bacteroidia	Bacteroidales	Rikenellaceae	Alistipes	Alistipes senegalensis|1033732	Yes
	Bacteroidetes	Bacteroidia	Bacteroidales	Rikenellaceae	Alistipes	Alistipes shahii|717959	Yes
	Bacteroidetes	Bacteroidia	Bacteroidales	Rikenellaceae	Alistipes	Alistipes sp. HGB5|908612	Yes
	Bacteroidetes	Bacteroidia	Bacteroidales	Rikenellaceae	Alistipes	Alistipes timonensis|1033731	Yes
	Bacteroidetes	Bacteroidia	Bacteroidales	Rikenellaceae	Alistipes	Candidatus Alistipes marseilloanorexicus|1211813	Yes
	Bacteroidetes	Bacteroidia	Bacteroidales	Rikenellaceae	Rikenella	Rikenella microfusus|880526	Yes
	Bacteroidetes	Bacteroidia	Bacteroidales	Rikenellaceae		Rikenellaceae bacterium M3|1433126	Yes
	Bacteroidetes	Bacteroidia	Bacteroidales			Bacteroidales bacterium ph8|1118061	Yes
	Bacteroidetes	Cytophagia	Cytophagales	Amoebophilaceae	Candidatus Amoebophilus	Candidatus Amoebophilus asiaticus|452471	Yes
	Bacteroidetes	Cytophagia	Cytophagales	Cyclobacteriaceae	Algoriphagus	Algoriphagus machipongonensis|388413	Yes
	Bacteroidetes	Cytophagia	Cytophagales	Cyclobacteriaceae	Algoriphagus	Algoriphagus mannitolivorans|1120965	Yes
	Bacteroidetes	Cytophagia	Cytophagales	Cyclobacteriaceae	Algoriphagus	Algoriphagus marincola|1305737	Yes
	Bacteroidetes	Cytophagia	Cytophagales	Cyclobacteriaceae	Algoriphagus	Algoriphagus terrigena|1120967	Yes
	Bacteroidetes	Cytophagia	Cytophagales	Cyclobacteriaceae	Algoriphagus	Algoriphagus vanfongensis|1120968	Yes
	Bacteroidetes	Cytophagia	Cytophagales	Cyclobacteriaceae	Belliella	Belliella baltica|866536	Yes
	Bacteroidetes	Cytophagia	Cytophagales	Cyclobacteriaceae	Cecembia	Cecembia lonarensis|1225176	Yes
	Bacteroidetes	Cytophagia	Cytophagales	Cyclobacteriaceae	Cyclobacterium	Cyclobacterium marinum|880070	Yes
	Bacteroidetes	Cytophagia	Cytophagales	Cyclobacteriaceae	Cyclobacterium	Cyclobacterium qasimii|641524	Yes
	Bacteroidetes	Cytophagia	Cytophagales	Cyclobacteriaceae	Echinicola	Echinicola pacifica|1121859	Yes
	Bacteroidetes	Cytophagia	Cytophagales	Cyclobacteriaceae	Echinicola	Echinicola vietnamensis|926556	Yes
	Bacteroidetes	Cytophagia	Cytophagales	Cyclobacteriaceae	Indibacter	Indibacter alkaliphilus|1189612	Yes
	Bacteroidetes	Cytophagia	Cytophagales	Cyclobacteriaceae	Mariniradius	Mariniradius saccharolyticus|1239962	Yes
	Bacteroidetes	Cytophagia	Cytophagales	Cyclobacteriaceae		Cyclobacteriaceae bacterium AK24|1288963	Yes
	Bacteroidetes	Cytophagia	Cytophagales	Cytophagaceae	Adhaeribacter	Adhaeribacter aquaticus|926549	Yes
	Bacteroidetes	Cytophagia	Cytophagales	Cytophagaceae	Anditalea	Anditalea andensis|1048983	Yes
	Bacteroidetes	Cytophagia	Cytophagales	Cytophagaceae	Cytophaga	Cytophaga aurantiaca|1121373	Yes
	Bacteroidetes	Cytophagia	Cytophagales	Cytophagaceae	Cytophaga	Cytophaga fermentans|869213	Yes
	Bacteroidetes	Cytophagia	Cytophagales	Cytophagaceae	Cytophaga	Cytophaga hutchinsonii|269798	Yes
	Bacteroidetes	Cytophagia	Cytophagales	Cytophagaceae	Dyadobacter	Dyadobacter alkalitolerans|1121481	Yes
	Bacteroidetes	Cytophagia	Cytophagales	Cytophagaceae	Dyadobacter	Dyadobacter beijingensis|1121482	Yes
	Bacteroidetes	Cytophagia	Cytophagales	Cytophagaceae	Dyadobacter	Dyadobacter crusticola|1121483	Yes
	Bacteroidetes	Cytophagia	Cytophagales	Cytophagaceae	Dyadobacter	Dyadobacter fermentans|471854	Yes
	Bacteroidetes	Cytophagia	Cytophagales	Cytophagaceae	Dyadobacter	Dyadobacter tibetensis|1434325	Yes
	Bacteroidetes	Cytophagia	Cytophagales	Cytophagaceae	Fibrisoma	Fibrisoma limi|1185876	Yes
	Bacteroidetes	Cytophagia	Cytophagales	Cytophagaceae	Flexibacter	Flexibacter elegans|1121902	Yes
	Bacteroidetes	Cytophagia	Cytophagales	Cytophagaceae	Flexibacter	Flexibacter roseolus|1121903	Yes
	Bacteroidetes	Cytophagia	Cytophagales	Cytophagaceae	Hymenobacter	Hymenobacter aerophilus|1121953	Yes
	Bacteroidetes	Cytophagia	Cytophagales	Cytophagaceae	Hymenobacter	Hymenobacter norwichensis|1121957	Yes
	Bacteroidetes	Cytophagia	Cytophagales	Cytophagaceae	Hymenobacter	Hymenobacter sp. APR13|1356852	Yes
	Bacteroidetes	Cytophagia	Cytophagales	Cytophagaceae	Hymenobacter	Hymenobacter swuensis|1227739	Yes
	Bacteroidetes	Cytophagia	Cytophagales	Cytophagaceae	Leadbetterella	Leadbetterella byssophila|649349	Yes
	Bacteroidetes	Cytophagia	Cytophagales	Cytophagaceae	Microscilla	Microscilla marina|313606	Yes
	Bacteroidetes	Cytophagia	Cytophagales	Cytophagaceae	Pontibacter	Pontibacter actiniarum|709015	Yes
	Bacteroidetes	Cytophagia	Cytophagales	Cytophagaceae	Pontibacter	Pontibacter roseus|1122967	Yes
	Bacteroidetes	Cytophagia	Cytophagales	Cytophagaceae	Pontibacter	Pontibacter sp. BAB1700|1144253	Yes
	Bacteroidetes	Cytophagia	Cytophagales	Cytophagaceae	Rhodonellum	Rhodonellum psychrophilum|1123057	Yes
	Bacteroidetes	Cytophagia	Cytophagales	Cytophagaceae	Rudanella	Rudanella lutea|1089547	Yes
	Bacteroidetes	Cytophagia	Cytophagales	Cytophagaceae	Runella	Runella limosa|1123077	Yes
	Bacteroidetes	Cytophagia	Cytophagales	Cytophagaceae	Runella	Runella slithyformis|761193	Yes
	Bacteroidetes	Cytophagia	Cytophagales	Cytophagaceae	Runella	Runella zeae|1123078	Yes
	Bacteroidetes	Cytophagia	Cytophagales	Cytophagaceae	Spirosoma	Spirosoma luteum|1123276	Yes
	Bacteroidetes	Cytophagia	Cytophagales	Cytophagaceae	Spirosoma	Spirosoma panaciterrae|1123277	Yes
	Bacteroidetes	Cytophagia	Cytophagales	Cytophagaceae	Spirosoma	Spirosoma spitsbergense|1123278	Yes
	Bacteroidetes	Cytophagia	Cytophagales	Cytophagaceae	Sporocytophaga	Sporocytophaga myxococcoides|926565	Yes
	Bacteroidetes	Cytophagia	Cytophagales	Flammeovirgaceae	Cesiribacter	Cesiribacter andamanensis|1279009	Yes
	Bacteroidetes	Cytophagia	Cytophagales	Flammeovirgaceae	Flexithrix	Flexithrix dorotheae|1121904	Yes
	Bacteroidetes	Cytophagia	Cytophagales	Flammeovirgaceae	Fulvivirga	Fulvivirga imtechensis|1237149	Yes
	Bacteroidetes	Cytophagia	Cytophagales	Flammeovirgaceae	Nafulsella	Nafulsella turpanensis|1124780	Yes
	Bacteroidetes	Flavobacteriia	Flavobacteriales	Cryomorphaceae	Crocinitomix	Crocinitomix catalasitica|1408433	Yes
	Bacteroidetes	Flavobacteriia	Flavobacteriales	Cryomorphaceae	Fluviicola	Fluviicola taffensis|755732	Yes
	Bacteroidetes	Flavobacteriia	Flavobacteriales	Cryomorphaceae	Owenweeksia	Owenweeksia hongkongensis|926562	Yes
	Bacteroidetes	Flavobacteriia	Flavobacteriales	Flavobacteriaceae	Aequorivita	Aequorivita capsosiphonis|1120951	Yes
	Bacteroidetes	Flavobacteriia	Flavobacteriales	Flavobacteriaceae	Aequorivita	Aequorivita sublithincola|746697	Yes
	Bacteroidetes	Flavobacteriia	Flavobacteriales	Flavobacteriaceae	Algibacter	Algibacter lectus|221126	Yes
	Bacteroidetes	Flavobacteriia	Flavobacteriales	Flavobacteriaceae	Aquimarina	Aquimarina agarilytica|620914	Yes
	Bacteroidetes	Flavobacteriia	Flavobacteriales	Flavobacteriaceae	Aquimarina	Aquimarina latercula|1121006	Yes
	Bacteroidetes	Flavobacteriia	Flavobacteriales	Flavobacteriaceae	Aquimarina	Aquimarina macrocephali|1443665	Yes
	Bacteroidetes	Flavobacteriia	Flavobacteriales	Flavobacteriaceae	Aquimarina	Aquimarina megaterium|1296416	Yes
	Bacteroidetes	Flavobacteriia	Flavobacteriales	Flavobacteriaceae	Aquimarina	Aquimarina muelleri|1121007	Yes
	Bacteroidetes	Flavobacteriia	Flavobacteriales	Flavobacteriaceae	Aquimarina	Aquimarina sp. 22II-S11-z7|1317122	Yes
	Bacteroidetes	Flavobacteriia	Flavobacteriales	Flavobacteriaceae	Arenibacter	Arenibacter algicola|616991	Yes
	Bacteroidetes	Flavobacteriia	Flavobacteriales	Flavobacteriaceae	Arenibacter	Arenibacter certesii|1121011	Yes
	Bacteroidetes	Flavobacteriia	Flavobacteriales	Flavobacteriaceae	Arenibacter	Arenibacter latericius|1121012	Yes
	Bacteroidetes	Flavobacteriia	Flavobacteriales	Flavobacteriaceae	Arenitalea	Arenitalea lutea|1178825	Yes
	Bacteroidetes	Flavobacteriia	Flavobacteriales	Flavobacteriaceae	Bergeyella	Bergeyella zoohelcum|883096	Yes
	Bacteroidetes	Flavobacteriia	Flavobacteriales	Flavobacteriaceae	Bizionia	Bizionia argentinensis|1046627	Yes
	Bacteroidetes	Flavobacteriia	Flavobacteriales	Flavobacteriaceae	Capnocytophaga	Capnocytophaga cynodegmi|926551	Yes
	Bacteroidetes	Flavobacteriia	Flavobacteriales	Flavobacteriaceae	Capnocytophaga	Capnocytophaga gingivalis|553178	Yes
	Bacteroidetes	Flavobacteriia	Flavobacteriales	Flavobacteriaceae	Capnocytophaga	Capnocytophaga granulosa|641143	Yes
	Bacteroidetes	Flavobacteriia	Flavobacteriales	Flavobacteriaceae	Capnocytophaga	Capnocytophaga ochracea|1125719	Yes
	Bacteroidetes	Flavobacteriia	Flavobacteriales	Flavobacteriaceae	Capnocytophaga	Capnocytophaga sp. oral taxon 326|1035193	Yes
	Bacteroidetes	Flavobacteriia	Flavobacteriales	Flavobacteriaceae	Capnocytophaga	Capnocytophaga sputigena|553177	Yes
	Bacteroidetes	Flavobacteriia	Flavobacteriales	Flavobacteriaceae	Cellulophaga	Cellulophaga algicola|688270	Yes
	Bacteroidetes	Flavobacteriia	Flavobacteriales	Flavobacteriaceae	Cellulophaga	Cellulophaga baltica|1348582	Yes
	Bacteroidetes	Flavobacteriia	Flavobacteriales	Flavobacteriaceae	Cellulophaga	Cellulophaga geojensis|1328323	Yes
	Bacteroidetes	Flavobacteriia	Flavobacteriales	Flavobacteriaceae	Cellulophaga	Cellulophaga lytica|867900	Yes
	Bacteroidetes	Flavobacteriia	Flavobacteriales	Flavobacteriaceae	Cellulophaga	Cellulophaga sp. E6(2014)|1495334	Yes
	Bacteroidetes	Flavobacteriia	Flavobacteriales	Flavobacteriaceae	Chryseobacterium	Chryseobacterium antarcticum|266748	Yes
	Bacteroidetes	Flavobacteriia	Flavobacteriales	Flavobacteriaceae	Chryseobacterium	Chryseobacterium caeni|1121285	Yes
	Bacteroidetes	Flavobacteriia	Flavobacteriales	Flavobacteriaceae	Chryseobacterium	Chryseobacterium daeguense|1121286	Yes
	Bacteroidetes	Flavobacteriia	Flavobacteriales	Flavobacteriaceae	Chryseobacterium	Chryseobacterium formosense|236814	Yes
	Bacteroidetes	Flavobacteriia	Flavobacteriales	Flavobacteriaceae	Chryseobacterium	Chryseobacterium gleum|525257	Yes
	Bacteroidetes	Flavobacteriia	Flavobacteriales	Flavobacteriaceae	Chryseobacterium	Chryseobacterium gregarium|1121287	Yes
	Bacteroidetes	Flavobacteriia	Flavobacteriales	Flavobacteriaceae	Chryseobacterium	Chryseobacterium haifense|1450526	Yes
	Bacteroidetes	Flavobacteriia	Flavobacteriales	Flavobacteriaceae	Chryseobacterium	Chryseobacterium hispalense|491205	Yes
	Bacteroidetes	Flavobacteriia	Flavobacteriales	Flavobacteriaceae	Chryseobacterium	Chryseobacterium indologenes|1218103	Yes
	Bacteroidetes	Flavobacteriia	Flavobacteriales	Flavobacteriaceae	Chryseobacterium	Chryseobacterium luteum|421531	Yes
	Bacteroidetes	Flavobacteriia	Flavobacteriales	Flavobacteriaceae	Chryseobacterium	Chryseobacterium palustre|1121288	Yes
	Bacteroidetes	Flavobacteriia	Flavobacteriales	Flavobacteriaceae	Chryseobacterium	Chryseobacterium piperi|558152	Yes
	Bacteroidetes	Flavobacteriia	Flavobacteriales	Flavobacteriaceae	Chryseobacterium	Chryseobacterium soli|445961	Yes
	Bacteroidetes	Flavobacteriia	Flavobacteriales	Flavobacteriaceae	Chryseobacterium	Chryseobacterium sp. UNC8MFCol|1340435	Yes
	Bacteroidetes	Flavobacteriia	Flavobacteriales	Flavobacteriaceae	Chryseobacterium	Chryseobacterium vrystaatense|307480	Yes
	Bacteroidetes	Flavobacteriia	Flavobacteriales	Flavobacteriaceae	Dokdonia	Dokdonia donghaensis|313590	Yes
	Bacteroidetes	Flavobacteriia	Flavobacteriales	Flavobacteriaceae	Elizabethkingia	Elizabethkingia anophelis|1338017	Yes
	Bacteroidetes	Flavobacteriia	Flavobacteriales	Flavobacteriaceae	Elizabethkingia	Elizabethkingia meningoseptica|1355388	Yes
	Bacteroidetes	Flavobacteriia	Flavobacteriales	Flavobacteriaceae	Elizabethkingia	Elizabethkingia miricola|172045	Yes
	Bacteroidetes	Flavobacteriia	Flavobacteriales	Flavobacteriaceae	Empedobacter	Empedobacter brevis|1218108	Yes
	Bacteroidetes	Flavobacteriia	Flavobacteriales	Flavobacteriaceae	Epilithonimonas	Epilithonimonas lactis|421072	Yes
	Bacteroidetes	Flavobacteriia	Flavobacteriales	Flavobacteriaceae	Epilithonimonas	Epilithonimonas sp. FH1|1233951	Yes
	Bacteroidetes	Flavobacteriia	Flavobacteriales	Flavobacteriaceae	Epilithonimonas	Epilithonimonas tenax|1121870	Yes
	Bacteroidetes	Flavobacteriia	Flavobacteriales	Flavobacteriaceae	Eudoraea	Eudoraea adriatica|1121875	Yes
	Bacteroidetes	Flavobacteriia	Flavobacteriales	Flavobacteriaceae	Flavobacterium	Flavobacterium antarcticum|1111730	Yes
	Bacteroidetes	Flavobacteriia	Flavobacteriales	Flavobacteriaceae	Flavobacterium	Flavobacterium aquatile|1453498	Yes
	Bacteroidetes	Flavobacteriia	Flavobacteriales	Flavobacteriaceae	Flavobacterium	Flavobacterium beibuense|1406840	Yes
	Bacteroidetes	Flavobacteriia	Flavobacteriales	Flavobacteriaceae	Flavobacterium	Flavobacterium branchiophilum|1034807	Yes
	Bacteroidetes	Flavobacteriia	Flavobacteriales	Flavobacteriaceae	Flavobacterium	Flavobacterium cauense|1341154	Yes
	Bacteroidetes	Flavobacteriia	Flavobacteriales	Flavobacteriaceae	Flavobacterium	Flavobacterium chungangense|1453505	Yes
	Bacteroidetes	Flavobacteriia	Flavobacteriales	Flavobacteriaceae	Flavobacterium	Flavobacterium columnare|1041826	Yes
	Bacteroidetes	Flavobacteriia	Flavobacteriales	Flavobacteriaceae	Flavobacterium	Flavobacterium daejeonense|1121887	Yes
	Bacteroidetes	Flavobacteriia	Flavobacteriales	Flavobacteriaceae	Flavobacterium	Flavobacterium denitrificans|1121888	Yes
	Bacteroidetes	Flavobacteriia	Flavobacteriales	Flavobacteriaceae	Flavobacterium	Flavobacterium enshiense|1107311	Yes
	Bacteroidetes	Flavobacteriia	Flavobacteriales	Flavobacteriaceae	Flavobacterium	Flavobacterium filum|1121889	Yes
	Bacteroidetes	Flavobacteriia	Flavobacteriales	Flavobacteriaceae	Flavobacterium	Flavobacterium frigidarium|1121890	Yes
	Bacteroidetes	Flavobacteriia	Flavobacteriales	Flavobacteriaceae	Flavobacterium	Flavobacterium frigoris|1086011	Yes
	Bacteroidetes	Flavobacteriia	Flavobacteriales	Flavobacteriaceae	Flavobacterium	Flavobacterium gelidilacus|1121891	Yes
	Bacteroidetes	Flavobacteriia	Flavobacteriales	Flavobacteriaceae	Flavobacterium	Flavobacterium hydatis|991	Yes
	Bacteroidetes	Flavobacteriia	Flavobacteriales	Flavobacteriaceae	Flavobacterium	Flavobacterium indicum|1094466	Yes
	Bacteroidetes	Flavobacteriia	Flavobacteriales	Flavobacteriaceae	Flavobacterium	Flavobacterium johnsoniae|376686	Yes
	Bacteroidetes	Flavobacteriia	Flavobacteriales	Flavobacteriaceae	Flavobacterium	Flavobacterium limnosediminis|1341181	Yes
	Bacteroidetes	Flavobacteriia	Flavobacteriales	Flavobacteriaceae	Flavobacterium	Flavobacterium psychrophilum|1452724	Yes
	Bacteroidetes	Flavobacteriia	Flavobacteriales	Flavobacteriaceae	Flavobacterium	Flavobacterium reichenbachii|362418	Yes
	Bacteroidetes	Flavobacteriia	Flavobacteriales	Flavobacteriaceae	Flavobacterium	Flavobacterium rivuli|1121895	Yes
	Bacteroidetes	Flavobacteriia	Flavobacteriales	Flavobacteriaceae	Flavobacterium	Flavobacterium saliperosum|1341155	Yes
	Bacteroidetes	Flavobacteriia	Flavobacteriales	Flavobacteriaceae	Flavobacterium	Flavobacterium sasangense|1121896	Yes
	Bacteroidetes	Flavobacteriia	Flavobacteriales	Flavobacteriaceae	Flavobacterium	Flavobacterium soli|1121897	Yes
	Bacteroidetes	Flavobacteriia	Flavobacteriales	Flavobacteriaceae	Flavobacterium	Flavobacterium sp. F52|1202532	Yes
	Bacteroidetes	Flavobacteriia	Flavobacteriales	Flavobacteriaceae	Flavobacterium	Flavobacterium subsaxonicum|1121898	Yes
	Bacteroidetes	Flavobacteriia	Flavobacteriales	Flavobacteriaceae	Flavobacterium	Flavobacterium succinicans|1450525	Yes
	Bacteroidetes	Flavobacteriia	Flavobacteriales	Flavobacteriaceae	Flavobacterium	Flavobacterium suncheonense|1121899	Yes
	Bacteroidetes	Flavobacteriia	Flavobacteriales	Flavobacteriaceae	Flavobacterium	Flavobacterium tegetincola|1121901	Yes
	Bacteroidetes	Flavobacteriia	Flavobacteriales	Flavobacteriaceae	Formosa	Formosa agariphila|1347342	Yes
	Bacteroidetes	Flavobacteriia	Flavobacteriales	Flavobacteriaceae	Formosa	Formosa sp. AK20|1137281	Yes
	Bacteroidetes	Flavobacteriia	Flavobacteriales	Flavobacteriaceae	Gaetbulibacter	Gaetbulibacter saemankumensis|1121909	Yes
	Bacteroidetes	Flavobacteriia	Flavobacteriales	Flavobacteriaceae	Galbibacter	Galbibacter marinus|555500	Yes
	Bacteroidetes	Flavobacteriia	Flavobacteriales	Flavobacteriaceae	Gelidibacter	Gelidibacter mesophilus|1121912	Yes
	Bacteroidetes	Flavobacteriia	Flavobacteriales	Flavobacteriaceae	Gillisia	Gillisia limnaea|865937	Yes
	Bacteroidetes	Flavobacteriia	Flavobacteriales	Flavobacteriaceae	Gillisia	Gillisia marina|1167637	Yes
	Bacteroidetes	Flavobacteriia	Flavobacteriales	Flavobacteriaceae	Gillisia	Gillisia sp. JM1|1283286	Yes
	Bacteroidetes	Flavobacteriia	Flavobacteriales	Flavobacteriaceae	Gramella	Gramella echinicola|1121931	Yes
	Bacteroidetes	Flavobacteriia	Flavobacteriales	Flavobacteriaceae	Gramella	Gramella portivictoriae|1121932	Yes
	Bacteroidetes	Flavobacteriia	Flavobacteriales	Flavobacteriaceae	Imtechella	Imtechella halotolerans|946077	Yes
	Bacteroidetes	Flavobacteriia	Flavobacteriales	Flavobacteriaceae	Jejuia	Jejuia pallidilutea|504487	Yes
	Bacteroidetes	Flavobacteriia	Flavobacteriales	Flavobacteriaceae	Joostella	Joostella marina|926559	Yes
	Bacteroidetes	Flavobacteriia	Flavobacteriales	Flavobacteriaceae	Kordia	Kordia algicida|391587	Yes
	Bacteroidetes	Flavobacteriia	Flavobacteriales	Flavobacteriaceae	Lacinutrix	Lacinutrix sp. 5H-3-7-4|983544	Yes
	Bacteroidetes	Flavobacteriia	Flavobacteriales	Flavobacteriaceae	Leeuwenhoekiella	Leeuwenhoekiella blandensis|398720	Yes
	Bacteroidetes	Flavobacteriia	Flavobacteriales	Flavobacteriaceae	Leeuwenhoekiella	Leeuwenhoekiella sp. Hel_I_48|1392488	Yes
	Bacteroidetes	Flavobacteriia	Flavobacteriales	Flavobacteriaceae	Mangrovimonas	Mangrovimonas yunxiaonensis|1197477	Yes
	Bacteroidetes	Flavobacteriia	Flavobacteriales	Flavobacteriaceae	Maribacter	Maribacter antarcticus|1122191	Yes
	Bacteroidetes	Flavobacteriia	Flavobacteriales	Flavobacteriaceae	Maribacter	Maribacter sp. Hel_I_7|1249997	Yes
	Bacteroidetes	Flavobacteriia	Flavobacteriales	Flavobacteriaceae	Mesoflavibacter	Mesoflavibacter zeaxanthinifaciens|1122225	Yes
	Bacteroidetes	Flavobacteriia	Flavobacteriales	Flavobacteriaceae	Mesonia	Mesonia mobilis|1122226	Yes
	Bacteroidetes	Flavobacteriia	Flavobacteriales	Flavobacteriaceae	Muricauda	Muricauda ruestringensis|886377	Yes
	Bacteroidetes	Flavobacteriia	Flavobacteriales	Flavobacteriaceae	Myroides	Myroides injenensis|1008457	Yes
	Bacteroidetes	Flavobacteriia	Flavobacteriales	Flavobacteriaceae	Myroides	Myroides odoratimimus|1416760	Yes
	Bacteroidetes	Flavobacteriia	Flavobacteriales	Flavobacteriaceae	Myroides	Myroides odoratus|929704	Yes
	Bacteroidetes	Flavobacteriia	Flavobacteriales	Flavobacteriaceae	Nonlabens	Nonlabens dokdonensis|592029	Yes
	Bacteroidetes	Flavobacteriia	Flavobacteriales	Flavobacteriaceae	Nonlabens	Nonlabens sediminis|319236	Yes
	Bacteroidetes	Flavobacteriia	Flavobacteriales	Flavobacteriaceae	Nonlabens	Nonlabens ulvanivorans|906888	Yes
	Bacteroidetes	Flavobacteriia	Flavobacteriales	Flavobacteriaceae	Olleya	Olleya marilimosa|1353276	Yes
	Bacteroidetes	Flavobacteriia	Flavobacteriales	Flavobacteriaceae	Olleya	Olleya sp. VCSM12|745718	Yes
	Bacteroidetes	Flavobacteriia	Flavobacteriales	Flavobacteriaceae	Ornithobacterium	Ornithobacterium rhinotracheale|1401326	Yes
	Bacteroidetes	Flavobacteriia	Flavobacteriales	Flavobacteriaceae	Polaribacter	Polaribacter irgensii|313594	Yes
	Bacteroidetes	Flavobacteriia	Flavobacteriales	Flavobacteriaceae	Polaribacter	Polaribacter sp. Hel1_85|1250005	Yes
	Bacteroidetes	Flavobacteriia	Flavobacteriales	Flavobacteriaceae	Psychroflexus	Psychroflexus gondwanensis|1189619	Yes
	Bacteroidetes	Flavobacteriia	Flavobacteriales	Flavobacteriaceae	Psychroflexus	Psychroflexus torquis|313595	Yes
	Bacteroidetes	Flavobacteriia	Flavobacteriales	Flavobacteriaceae	Psychroflexus	Psychroflexus tropicus|1123035	Yes
	Bacteroidetes	Flavobacteriia	Flavobacteriales	Flavobacteriaceae	Psychroserpens	Psychroserpens burtonensis|1123037	Yes
	Bacteroidetes	Flavobacteriia	Flavobacteriales	Flavobacteriaceae	Riemerella	Riemerella anatipestifer|1203260	Yes
	Bacteroidetes	Flavobacteriia	Flavobacteriales	Flavobacteriaceae	Riemerella	Riemerella columbina|1123058	Yes
	Bacteroidetes	Flavobacteriia	Flavobacteriales	Flavobacteriaceae	Salinimicrobium	Salinimicrobium terrae|1123234	Yes
	Bacteroidetes	Flavobacteriia	Flavobacteriales	Flavobacteriaceae	Salinimicrobium	Salinimicrobium xinjiangense|1123235	Yes
	Bacteroidetes	Flavobacteriia	Flavobacteriales	Flavobacteriaceae	Sediminibacter	Sediminibacter sp. Hel_I_10|1392490	Yes
	Bacteroidetes	Flavobacteriia	Flavobacteriales	Flavobacteriaceae	Tenacibaculum	Tenacibaculum maritimum|1349785	Yes
	Bacteroidetes	Flavobacteriia	Flavobacteriales	Flavobacteriaceae	Tenacibaculum	Tenacibaculum ovolyticum|1123347	Yes
	Bacteroidetes	Flavobacteriia	Flavobacteriales	Flavobacteriaceae	Tenacibaculum	Tenacibaculum sp. 47A_GOM-205m|1380384	Yes
	Bacteroidetes	Flavobacteriia	Flavobacteriales	Flavobacteriaceae	Weeksella	Weeksella sp. FF8|1461577	Yes
	Bacteroidetes	Flavobacteriia	Flavobacteriales	Flavobacteriaceae	Winogradskyella	Winogradskyella psychrotolerans|641526	Yes
	Bacteroidetes	Flavobacteriia	Flavobacteriales	Flavobacteriaceae	Zhouia	Zhouia amylolytica|1286632	Yes
	Bacteroidetes	Flavobacteriia	Flavobacteriales	Flavobacteriaceae		Flavobacteriaceae bacterium HQM9|980584	Yes
	Bacteroidetes	Flavobacteriia	Flavobacteriales	Schleiferiaceae	Schleiferia	Schleiferia thermophila|1453500	Yes
	Bacteroidetes	Flavobacteriia	Flavobacteriales			Flavobacteriales bacterium ALC-1|391603	Yes
	Bacteroidetes	Flavobacteriia				Flavobacteria bacterium BBFL7|156586	Yes
	Bacteroidetes	Sphingobacteriia	Sphingobacteriales	Saprospiraceae	Haliscomenobacter	Haliscomenobacter hydrossis|760192	Yes
	Bacteroidetes	Sphingobacteriia	Sphingobacteriales	Saprospiraceae	Lewinella	Lewinella persica|1122179	Yes
	Bacteroidetes	Sphingobacteriia	Sphingobacteriales	Saprospiraceae	Saprospira	Saprospira grandis|984262	Yes
	Bacteroidetes	Sphingobacteriia	Sphingobacteriales	Saprospiraceae		Saprospiraceae bacterium KD52|1524460	Yes
	Bacteroidetes	Sphingobacteriia	Sphingobacteriales	Sphingobacteriaceae	Arcticibacter	Arcticibacter svalbardensis|1150600	Yes
	Bacteroidetes	Sphingobacteriia	Sphingobacteriales	Sphingobacteriaceae	Mucilaginibacter	Mucilaginibacter paludis|714943	Yes
	Bacteroidetes	Sphingobacteriia	Sphingobacteriales	Sphingobacteriaceae	Olivibacter	Olivibacter sitiensis|1122621	Yes
	Bacteroidetes	Sphingobacteriia	Sphingobacteriales	Sphingobacteriaceae	Pedobacter	Pedobacter agri|1149865	Yes
	Bacteroidetes	Sphingobacteriia	Sphingobacteriales	Sphingobacteriaceae	Pedobacter	Pedobacter arcticus|1206103	Yes
	Bacteroidetes	Sphingobacteriia	Sphingobacteriales	Sphingobacteriaceae	Pedobacter	Pedobacter borealis|1454007	Yes
	Bacteroidetes	Sphingobacteriia	Sphingobacteriales	Sphingobacteriaceae	Pedobacter	Pedobacter glucosidilyticus|540906	Yes
	Bacteroidetes	Sphingobacteriia	Sphingobacteriales	Sphingobacteriaceae	Pedobacter	Pedobacter oryzae|468059	Yes
	Bacteroidetes	Sphingobacteriia	Sphingobacteriales	Sphingobacteriaceae	Pedobacter	Pedobacter saltans|762903	Yes
	Bacteroidetes	Sphingobacteriia	Sphingobacteriales	Sphingobacteriaceae	Pedobacter	Pedobacter sp. V48|509635	Yes
	Bacteroidetes	Sphingobacteriia	Sphingobacteriales	Sphingobacteriaceae	Sphingobacterium	Sphingobacterium antarcticum|1358423	Yes
	Bacteroidetes	Sphingobacteriia	Sphingobacteriales	Sphingobacteriaceae	Sphingobacterium	Sphingobacterium paucimobilis|1346330	Yes
	Bacteroidetes	Sphingobacteriia	Sphingobacteriales	Sphingobacteriaceae	Sphingobacterium	Sphingobacterium sp. H1ai|1408813	Yes
	Bacteroidetes	Sphingobacteriia	Sphingobacteriales	Sphingobacteriaceae	Sphingobacterium	Sphingobacterium spiritivorum|525373	Yes
	Bacteroidetes	Sphingobacteriia	Sphingobacteriales	Sphingobacteriaceae	Sphingobacterium	Sphingobacterium thalpophilum|1123265	Yes
	Bacteroidetes	Sphingobacteriia	Sphingobacteriales	Sphingobacteriaceae		Sphingobacteriaceae bacterium DW12|1550091	Yes
	Bacteroidetes	Sphingobacteriia	Sphingobacteriales		Balneola	Balneola vulgaris|1121104	Yes
	Bacteroidetes	Sphingobacteriia	Sphingobacteriales		Chitinophaga	Chitinophaga pinensis|485918	Yes
	Bacteroidetes	Sphingobacteriia	Sphingobacteriales		Chitinophaga	Chitinophaga sp. JGI 0001002-D04|1235985	Yes
	Bacteroidetes	Sphingobacteriia	Sphingobacteriales		Gracilimonas	Gracilimonas tropica|1121930	Yes
	Bacteroidetes	Sphingobacteriia	Sphingobacteriales		Niabella	Niabella aurantiaca|1122605	Yes
	Bacteroidetes	Sphingobacteriia	Sphingobacteriales		Niabella	Niabella soli|929713	Yes
	Bacteroidetes	Sphingobacteriia	Sphingobacteriales		Sediminibacterium	Sediminibacterium salmoneum|1400522	Yes
	Bacteroidetes	Sphingobacteriia	Sphingobacteriales		Sediminibacterium	Sediminibacterium sp. OR43|1076522	Yes
	Bacteroidetes	Sphingobacteriia	Sphingobacteriales		Segetibacter	Segetibacter koreensis|1123248	Yes
	Bacteroidetes	Sphingobacteriia	Sphingobacteriales		Terrimonas	Terrimonas ferruginea|1123356	Yes
	Bacteroidetes		Bacteroidetes Order II. Incertae sedis	Rhodothermaceae	Rhodothermus	Rhodothermus marinus|762569	Yes
	Bacteroidetes		Bacteroidetes Order II. Incertae sedis	Rhodothermaceae	Salinibacter	Salinibacter ruber|761659	Yes
	Bacteroidetes		Bacteroidetes Order II. Incertae sedis	Rhodothermaceae	Salisaeta	Salisaeta longa|1089550	Yes
	Bacteroidetes				Prolixibacter	Prolixibacter bellariivorans|1408473	Yes
	Bacteroidetes					Bacteroidetes bacterium oral taxon 272|888054	Yes
	Bacteroidetes					Bacteroidetes oral taxon 274|575590	Yes
	Caldiserica	Caldisericia	Caldisericales	Caldisericaceae	Caldisericum	Caldisericum exile|511051	Yes
	Calescamantes				Candidatus Calescibacterium	Candidatus Calescibacterium nevadense|1379303	Yes
	Calescamantes					Calescamantes bacterium JGI 0000106-G12|1130329	Yes
	Candidatus Saccharibacteria				Candidatus Saccharimonas	Candidatus Saccharimonas aalborgensis|1332188	Yes
	Chlamydiae	Chlamydiia	Chlamydiales	Chlamydiaceae	Chlamydia	Chlamydia pneumoniae|115711	Yes
	Chlamydiae	Chlamydiia	Chlamydiales	Chlamydiaceae	Chlamydia	Chlamydia sp. 'Rubis'|1444712	Yes
	Chlamydiae	Chlamydiia	Chlamydiales	Criblamydiaceae	Criblamydia	Criblamydia sequanensis|1437425	Yes
	Chlamydiae	Chlamydiia	Chlamydiales	Parachlamydiaceae	Candidatus Protochlamydia	Candidatus Protochlamydia amoebophila|264201	Yes
	Chlamydiae	Chlamydiia	Chlamydiales	Parachlamydiaceae	Parachlamydia	Parachlamydia acanthamoebae|159254	Yes
	Chlamydiae	Chlamydiia	Chlamydiales	Waddliaceae	Waddlia	Waddlia chondrophila|716544	Yes
	Chlorobi	Chlorobia	Chlorobiales	Chlorobiaceae	Chlorobaculum	Chlorobaculum parvum|517417	Yes
	Chlorobi	Chlorobia	Chlorobiales	Chlorobiaceae	Chlorobaculum	Chlorobaculum tepidum|194439	Yes
	Chlorobi	Chlorobia	Chlorobiales	Chlorobiaceae	Chlorobium	Chlorobium chlorochromatii|340177	Yes
	Chlorobi	Chlorobia	Chlorobiales	Chlorobiaceae	Chlorobium	Chlorobium ferrooxidans|377431	Yes
	Chlorobi	Chlorobia	Chlorobiales	Chlorobiaceae	Chlorobium	Chlorobium limicola|290315	Yes
	Chlorobi	Chlorobia	Chlorobiales	Chlorobiaceae	Chlorobium	Chlorobium phaeobacteroides|331678	Yes
	Chlorobi	Chlorobia	Chlorobiales	Chlorobiaceae	Chlorobium	Chlorobium phaeovibrioides|290318	Yes
	Chlorobi	Chlorobia	Chlorobiales	Chlorobiaceae	Chlorobium	Chlorobium sp. GBChlB|1519464	Yes
	Chlorobi	Chlorobia	Chlorobiales	Chlorobiaceae	Chloroherpeton	Chloroherpeton thalassium|517418	Yes
	Chlorobi	Chlorobia	Chlorobiales	Chlorobiaceae	Pelodictyon	Pelodictyon luteolum|319225	Yes
	Chlorobi	Chlorobia	Chlorobiales	Chlorobiaceae	Pelodictyon	Pelodictyon phaeoclathratiforme|324925	Yes
	Chlorobi	Chlorobia	Chlorobiales	Chlorobiaceae	Prosthecochloris	Prosthecochloris aestuarii|290512	Yes
	Chloroflexi	Caldilineae	Caldilineales	Caldilineaceae	Caldilinea	Caldilinea aerophila|926550	Yes
	Chloroflexi	Chloroflexia	Chloroflexales	Chloroflexaceae	Chloroflexus	Chloroflexus aggregans|326427	Yes
	Chloroflexi	Chloroflexia	Chloroflexales	Chloroflexaceae	Chloroflexus	Chloroflexus aurantiacus|324602	Yes
	Chloroflexi	Chloroflexia	Chloroflexales	Chloroflexaceae	Chloroflexus	Chloroflexus sp. Y-400-fl|480224	Yes
	Chloroflexi	Chloroflexia	Chloroflexales	Oscillochloridaceae	Oscillochloris	Oscillochloris trichoides|765420	Yes
	Chloroflexi	Chloroflexia	Chloroflexales	Roseiflexaceae	Roseiflexus	Roseiflexus castenholzii|383372	Yes
	Chloroflexi	Chloroflexia	Chloroflexales	Roseiflexaceae	Roseiflexus	Roseiflexus sp. RS-1|357808	Yes
	Chloroflexi	Chloroflexia	Herpetosiphonales	Herpetosiphonaceae	Herpetosiphon	Herpetosiphon aurantiacus|316274	Yes
	Chloroflexi	Dehalococcoidia	Dehalococcoidales	Dehalococcoidaceae	Dehalococcoides	Dehalococcoides mccartyi|243164	Yes
	Chloroflexi	Dehalococcoidia			Dehalogenimonas	Dehalogenimonas lykanthroporepellens|552811	Yes
	Chloroflexi	Dehalococcoidia				Dehalococcoidia bacterium SCGC AB-539-J10|1318599	Yes
	Chloroflexi	Ktedonobacteria	Ktedonobacterales	Ktedonobacteraceae	Ktedonobacter	Ktedonobacter racemifer|485913	Yes
	Chloroflexi	Thermomicrobia	Sphaerobacterales	Sphaerobacteraceae	Nitrolancea	Nitrolancea hollandica|1129897	Yes
	Chloroflexi	Thermomicrobia	Sphaerobacterales	Sphaerobacteraceae	Sphaerobacter	Sphaerobacter thermophilus|479434	Yes
	Chloroflexi					Chloroflexi bacterium oral taxon 439|1311576	Yes
	Chrysiogenetes	Chrysiogenetes	Chrysiogenales	Chrysiogenaceae	Chrysiogenes	Chrysiogenes arsenatis|118005	Yes
	Cloacimonetes				Candidatus Cloacimonas	Candidatus Cloacimonas acidaminovorans|459349	Yes
	Cloacimonetes					Cloacimonetes bacterium JGI OTU-1|1379399	Yes
	Cyanobacteria	Gloeobacteria	Gloeobacterales		Gloeobacter	Gloeobacter kilaueensis|1183438	Yes
	Cyanobacteria	Gloeobacteria	Gloeobacterales		Gloeobacter	Gloeobacter violaceus|251221	Yes
	Cyanobacteria		Chroococcales		Acaryochloris	Acaryochloris marina|329726	Yes
	Cyanobacteria		Chroococcales		Acaryochloris	Acaryochloris sp. CCMEE 5410|310037	Yes
	Cyanobacteria		Chroococcales		Candidatus Atelocyanobacterium	Candidatus Atelocyanobacterium thalassa|1527444	Yes
	Cyanobacteria		Chroococcales		Chamaesiphon	Chamaesiphon minutus|1173020	Yes
	Cyanobacteria		Chroococcales		Crocosphaera	Crocosphaera watsonii|165597	Yes
	Cyanobacteria		Chroococcales		Cyanobacterium	Cyanobacterium aponinum|755178	Yes
	Cyanobacteria		Chroococcales		Cyanobacterium	Cyanobacterium stanieri|292563	Yes
	Cyanobacteria		Chroococcales		Cyanobium	Cyanobium gracile|292564	Yes
	Cyanobacteria		Chroococcales		Cyanobium	Cyanobium sp. CACIAM 14|1496688	Yes
	Cyanobacteria		Chroococcales		Cyanothece	Cyanothece sp. PCC 7822|497965	Yes
	Cyanobacteria		Chroococcales		Dactylococcopsis	Dactylococcopsis salina|13035	Yes
	Cyanobacteria		Chroococcales		Geminocystis	Geminocystis herdmanii|113355	Yes
	Cyanobacteria		Chroococcales		Gloeocapsa	Gloeocapsa sp. PCC 7428|1173026	Yes
	Cyanobacteria		Chroococcales		Halothece	Halothece sp. PCC 7418|65093	Yes
	Cyanobacteria		Chroococcales		Microcystis	Microcystis aeruginosa|1235808	Yes
	Cyanobacteria		Chroococcales		Microcystis	Microcystis sp. T1-4|1160279	Yes
	Cyanobacteria		Chroococcales		Neosynechococcus	Neosynechococcus sphagnicola|1497020	Yes
	Cyanobacteria		Chroococcales		Rubidibacter	Rubidibacter lacunae|582515	Yes
	Cyanobacteria		Chroococcales		Synechococcus	Candidatus Synechococcus spongiarum|1451353	Yes
	Cyanobacteria		Chroococcales		Synechococcus	Synechococcus elongatus|1140	Yes
	Cyanobacteria		Chroococcales		Synechococcus	Synechococcus sp. PCC 7335|91464	Yes
	Cyanobacteria		Chroococcales		Synechocystis	Synechocystis sp. PCC 7509|927677	Yes
	Cyanobacteria		Chroococcales		Thermosynechococcus	Thermosynechococcus elongatus|197221	Yes
	Cyanobacteria		Chroococcales		Thermosynechococcus	Thermosynechococcus sp. NK55a|1394889	Yes
	Cyanobacteria		Nostocales	Microchaetaceae	Microchaete	Microchaete sp. PCC 7126|643473	Yes
	Cyanobacteria		Nostocales	Microchaetaceae	Tolypothrix	[Scytonema hofmanni] UTEX 2349|1469607	Yes
	Cyanobacteria		Nostocales	Microchaetaceae	Tolypothrix	Tolypothrix bouteillei|1479485	Yes
	Cyanobacteria		Nostocales	Nostocaceae	Anabaena	Anabaena cylindrica|272123	Yes
	Cyanobacteria		Nostocales	Nostocaceae	Anabaena	Anabaena sp. PCC 7108|163908	Yes
	Cyanobacteria		Nostocales	Nostocaceae	Anabaena	Anabaena variabilis|240292	Yes
	Cyanobacteria		Nostocales	Nostocaceae	Aphanizomenon	Aphanizomenon flos-aquae|284502	Yes
	Cyanobacteria		Nostocales	Nostocaceae	Cylindrospermopsis	Cylindrospermopsis raciborskii|533240	Yes
	Cyanobacteria		Nostocales	Nostocaceae	Cylindrospermum	Cylindrospermum stagnale|56107	Yes
	Cyanobacteria		Nostocales	Nostocaceae	Dolichospermum	Dolichospermum circinale|398007	Yes
	Cyanobacteria		Nostocales	Nostocaceae	Nodularia	Nodularia spumigena|313624	Yes
	Cyanobacteria		Nostocales	Nostocaceae	Nostoc	Nostoc punctiforme|63737	Yes
	Cyanobacteria		Nostocales	Nostocaceae	Nostoc	Nostoc sp. PCC 7120|103690	Yes
	Cyanobacteria		Nostocales	Nostocaceae	Raphidiopsis	Raphidiopsis brookii|533247	Yes
	Cyanobacteria		Nostocales	Nostocaceae	Richelia	Richelia intracellularis|1165095	Yes
	Cyanobacteria		Nostocales	Nostocaceae	Trichormus	Trichormus azollae|551115	Yes
	Cyanobacteria		Nostocales	Rivulariaceae	Calothrix	Calothrix sp. PCC 7103|32057	Yes
	Cyanobacteria		Nostocales	Rivulariaceae	Rivularia	Rivularia sp. PCC 7116|373994	Yes
	Cyanobacteria		Nostocales	Scytonemataceae	Scytonema	Scytonema hofmanni|128403	Yes
	Cyanobacteria		Oscillatoriales		Arthrospira	Arthrospira maxima|513049	Yes
	Cyanobacteria		Oscillatoriales		Arthrospira	Arthrospira platensis|459495	Yes
	Cyanobacteria		Oscillatoriales		Arthrospira	Arthrospira sp. PCC 8005|376219	Yes
	Cyanobacteria		Oscillatoriales		Coleofasciculus	Coleofasciculus chthonoplastes|118168	Yes
	Cyanobacteria		Oscillatoriales		Crinalium	Crinalium epipsammum|1173022	Yes
	Cyanobacteria		Oscillatoriales		Geitlerinema	Geitlerinema sp. PCC 7105|102127	Yes
	Cyanobacteria		Oscillatoriales		Kamptonema	[Oscillatoria] sp. PCC 6506|272129	Yes
	Cyanobacteria		Oscillatoriales		Kamptonema	Kamptonema formosum|402777	Yes
	Cyanobacteria		Oscillatoriales		Leptolyngbya	Leptolyngbya boryana|272134	Yes
	Cyanobacteria		Oscillatoriales		Leptolyngbya	Leptolyngbya sp. PCC 7375|102129	Yes
	Cyanobacteria		Oscillatoriales		Lyngbya	Lyngbya aestuarii|1348334	Yes
	Cyanobacteria		Oscillatoriales		Lyngbya	Lyngbya sp. PCC 8106|313612	Yes
	Cyanobacteria		Oscillatoriales		Microcoleus	Microcoleus sp. PCC 7113|1173027	Yes
	Cyanobacteria		Oscillatoriales		Microcoleus	Microcoleus vaginatus|756067	Yes
	Cyanobacteria		Oscillatoriales		Moorea	Moorea producens|489825	Yes
	Cyanobacteria		Oscillatoriales		Nodosilinea	Nodosilinea nodulosa|118166	Yes
	Cyanobacteria		Oscillatoriales		Oscillatoria	Oscillatoria acuminata|56110	Yes
	Cyanobacteria		Oscillatoriales		Oscillatoria	Oscillatoria nigro-viridis|179408	Yes
	Cyanobacteria		Oscillatoriales		Oscillatoria	Oscillatoria sp. PCC 10802|1173028	Yes
	Cyanobacteria		Oscillatoriales		Planktothrix	Planktothrix agardhii|329553	Yes
	Cyanobacteria		Oscillatoriales		Planktothrix	Planktothrix mougeotii|545630	Yes
	Cyanobacteria		Oscillatoriales		Planktothrix	Planktothrix prolifica|1255359	Yes
	Cyanobacteria		Oscillatoriales		Planktothrix	Planktothrix rubescens|1255374	Yes
	Cyanobacteria		Oscillatoriales		Pseudanabaena	Pseudanabaena biceps|927668	Yes
	Cyanobacteria		Oscillatoriales		Pseudanabaena	Pseudanabaena sp. PCC 6802|118173	Yes
	Cyanobacteria		Oscillatoriales		Spirulina	Spirulina subsalsa|1173029	Yes
	Cyanobacteria		Oscillatoriales		Trichodesmium	Trichodesmium erythraeum|203124	Yes
	Cyanobacteria		Oscillatoriales			filamentous cyanobacterium ESFC-1|1128427	Yes
	Cyanobacteria		Oscillatoriales			Oscillatoriales cyanobacterium JSC-12|864702	Yes
	Cyanobacteria		Pleurocapsales		Pleurocapsa	Pleurocapsa sp. PCC 7319|118161	Yes
	Cyanobacteria		Pleurocapsales		Stanieria	Stanieria cyanosphaera|111780	Yes
	Cyanobacteria		Pleurocapsales		Xenococcus	Xenococcus sp. PCC 7305|102125	Yes
	Cyanobacteria		Prochlorales	Prochlorococcaceae	Prochlorococcus	Prochlorococcus marinus|93058	Yes
	Cyanobacteria		Prochlorales	Prochlorococcaceae	Prochlorococcus	Prochlorococcus sp. MIT 0701|1499502	Yes
	Cyanobacteria		Stigonematales		Chlorogloeopsis	Chlorogloeopsis fritschii|211165	Yes
	Cyanobacteria		Stigonematales		Fischerella	Fischerella muscicola|306281	Yes
	Cyanobacteria		Stigonematales		Fischerella	Fischerella sp. PCC 9605|1173024	Yes
	Cyanobacteria		Stigonematales		Fischerella	Fischerella thermalis|98439	Yes
	Cyanobacteria		Stigonematales		Mastigocladopsis	Mastigocladopsis repens|221288	Yes
	Cyanobacteria		Stigonematales		Mastigocoleus	Mastigocoleus testarum|371196	Yes
	Cyanobacteria					cyanobacterium PCC 7702|1173021	Yes
	Deferribacteres	Deferribacteres	Deferribacterales	Deferribacteraceae	Denitrovibrio	Denitrovibrio acetiphilus|522772	Yes
	Deferribacteres	Deferribacteres	Deferribacterales	Deferribacteraceae	Flexistipes	Flexistipes sinusarabici|717231	Yes
	Deferribacteres	Deferribacteres	Deferribacterales	Deferribacteraceae	Geovibrio	Geovibrio sp. L21-Ace-BES|1304888	Yes
	Deferribacteres	Deferribacteres	Deferribacterales	Deferribacteraceae	Mucispirillum	Mucispirillum schaedleri|1379858	Yes
	Deinococcus-Thermus	Deinococci	Deinococcales	Deinococcaceae	Deinococcus	Deinococcus apachensis|1121377	Yes
	Deinococcus-Thermus	Deinococci	Deinococcales	Deinococcaceae	Deinococcus	Deinococcus aquatilis|1121378	Yes
	Deinococcus-Thermus	Deinococci	Deinococcales	Deinococcaceae	Deinococcus	Deinococcus deserti|546414	Yes
	Deinococcus-Thermus	Deinococci	Deinococcales	Deinococcaceae	Deinococcus	Deinococcus ficus|1121379	Yes
	Deinococcus-Thermus	Deinococci	Deinococcales	Deinococcaceae	Deinococcus	Deinococcus frigens|1121380	Yes
	Deinococcus-Thermus	Deinococci	Deinococcales	Deinococcaceae	Deinococcus	Deinococcus geothermalis|319795	Yes
	Deinococcus-Thermus	Deinococci	Deinococcales	Deinococcaceae	Deinococcus	Deinococcus gobiensis|745776	Yes
	Deinococcus-Thermus	Deinococci	Deinococcales	Deinococcaceae	Deinococcus	Deinococcus maricopensis|709986	Yes
	Deinococcus-Thermus	Deinococci	Deinococcales	Deinococcaceae	Deinococcus	Deinococcus marmoris|1121381	Yes
	Deinococcus-Thermus	Deinococci	Deinococcales	Deinococcaceae	Deinococcus	Deinococcus murrayi|1121383	Yes
	Deinococcus-Thermus	Deinococci	Deinococcales	Deinococcaceae	Deinococcus	Deinococcus peraridilitoris|937777	Yes
	Deinococcus-Thermus	Deinococci	Deinococcales	Deinococcaceae	Deinococcus	Deinococcus phoenicis|1476583	Yes
	Deinococcus-Thermus	Deinococci	Deinococcales	Deinococcaceae	Deinococcus	Deinococcus pimensis|926554	Yes
	Deinococcus-Thermus	Deinococci	Deinococcales	Deinococcaceae	Deinococcus	Deinococcus proteolyticus|693977	Yes
	Deinococcus-Thermus	Deinococci	Deinococcales	Deinococcaceae	Deinococcus	Deinococcus radiodurans|243230	Yes
	Deinococcus-Thermus	Deinococci	Deinococcales	Deinococcaceae	Deinococcus	Deinococcus sp. 2009|684949	Yes
	Deinococcus-Thermus	Deinococci	Deinococcales	Deinococcaceae	Deinococcus	Deinococcus wulumuqiensis|1288484	Yes
	Deinococcus-Thermus	Deinococci	Deinococcales	Deinococcaceae	Deinococcus	Deinococcus xibeiensis|1403343	Yes
	Deinococcus-Thermus	Deinococci	Deinococcales	Trueperaceae	Truepera	Truepera radiovictrix|649638	Yes
	Deinococcus-Thermus	Deinococci	Thermales	Thermaceae	Marinithermus	Marinithermus hydrothermalis|869210	Yes
	Deinococcus-Thermus	Deinococci	Thermales	Thermaceae	Meiothermus	Meiothermus cerbereus|1122221	Yes
	Deinococcus-Thermus	Deinococci	Thermales	Thermaceae	Meiothermus	Meiothermus chliarophilus|926560	Yes
	Deinococcus-Thermus	Deinococci	Thermales	Thermaceae	Meiothermus	Meiothermus ruber|504728	Yes
	Deinococcus-Thermus	Deinococci	Thermales	Thermaceae	Meiothermus	Meiothermus rufus|604331	Yes
	Deinococcus-Thermus	Deinococci	Thermales	Thermaceae	Meiothermus	Meiothermus silvanus|526227	Yes
	Deinococcus-Thermus	Deinococci	Thermales	Thermaceae	Meiothermus	Meiothermus taiwanensis|1122222	Yes
	Deinococcus-Thermus	Deinococci	Thermales	Thermaceae	Meiothermus	Meiothermus timidus|1122223	Yes
	Deinococcus-Thermus	Deinococci	Thermales	Thermaceae	Oceanithermus	Oceanithermus profundus|670487	Yes
	Deinococcus-Thermus	Deinococci	Thermales	Thermaceae	Thermus	Thermus antranikianii|1123386	Yes
	Deinococcus-Thermus	Deinococci	Thermales	Thermaceae	Thermus	Thermus aquaticus|498848	Yes
	Deinococcus-Thermus	Deinococci	Thermales	Thermaceae	Thermus	Thermus filiformis|276	Yes
	Deinococcus-Thermus	Deinococci	Thermales	Thermaceae	Thermus	Thermus igniterrae|1123388	Yes
	Deinococcus-Thermus	Deinococci	Thermales	Thermaceae	Thermus	Thermus islandicus|1123389	Yes
	Deinococcus-Thermus	Deinococci	Thermales	Thermaceae	Thermus	Thermus oshimai|1123390	Yes
	Deinococcus-Thermus	Deinococci	Thermales	Thermaceae	Thermus	Thermus scotoductus|1123391	Yes
	Deinococcus-Thermus	Deinococci	Thermales	Thermaceae	Thermus	Thermus sp. NMX2.A1|570924	Yes
	Deinococcus-Thermus	Deinococci	Thermales	Thermaceae	Thermus	Thermus thermophilus|300852	Yes
	Dictyoglomi	Dictyoglomia	Dictyoglomales	Dictyoglomaceae	Dictyoglomus	Dictyoglomus thermophilum|309799	Yes
	Dictyoglomi	Dictyoglomia	Dictyoglomales	Dictyoglomaceae	Dictyoglomus	Dictyoglomus turgidum|515635	Yes
	Elusimicrobia	Elusimicrobia	Elusimicrobiales	Elusimicrobiaceae	Elusimicrobium	Elusimicrobium minutum|445932	Yes
	Fervidibacteria					Fervidibacteria bacterium SCGC AAA471-D06|1052808	Yes
	Fibrobacteres	Chitinivibrionia	Chitinivibrionales	Chitinivibrionaceae	Chitinivibrio	Chitinivibrio alkaliphilus|1313304	Yes
	Fibrobacteres	Fibrobacteria	Fibrobacterales	Fibrobacteraceae	Fibrobacter	Fibrobacter succinogenes|59374	Yes
	Firmicutes	Bacilli	Bacillales	Alicyclobacillaceae	Alicyclobacillus	Alicyclobacillus acidocaldarius|543302	Yes
	Firmicutes	Bacilli	Bacillales	Alicyclobacillaceae	Alicyclobacillus	Alicyclobacillus acidoterrestris|1356854	Yes
	Firmicutes	Bacilli	Bacillales	Alicyclobacillaceae	Alicyclobacillus	Alicyclobacillus contaminans|1120971	Yes
	Firmicutes	Bacilli	Bacillales	Alicyclobacillaceae	Alicyclobacillus	Alicyclobacillus herbarius|1120972	Yes
	Firmicutes	Bacilli	Bacillales	Alicyclobacillaceae	Alicyclobacillus	Alicyclobacillus hesperidum|1200346	Yes
	Firmicutes	Bacilli	Bacillales	Alicyclobacillaceae	Alicyclobacillus	Alicyclobacillus macrosporangiidus|1382304	Yes
	Firmicutes	Bacilli	Bacillales	Alicyclobacillaceae	Alicyclobacillus	Alicyclobacillus pohliae|1120973	Yes
	Firmicutes	Bacilli	Bacillales	Alicyclobacillaceae	Alicyclobacillus	Alicyclobacillus pomorum|1111479	Yes
	Firmicutes	Bacilli	Bacillales	Alicyclobacillaceae	Kyrpidia	Kyrpidia tusciae|562970	Yes
	Firmicutes	Bacilli	Bacillales	Alicyclobacillaceae	Tumebacillus	Tumebacillus flagellatus|1157490	Yes
	Firmicutes	Bacilli	Bacillales	Bacillaceae	Alkalibacillus	Alkalibacillus haloalkaliphilus|1193119	Yes
	Firmicutes	Bacilli	Bacillales	Bacillaceae	Amphibacillus	Amphibacillus jilinensis|562743	Yes
	Firmicutes	Bacilli	Bacillales	Bacillaceae	Amphibacillus	Amphibacillus xylanus|698758	Yes
	Firmicutes	Bacilli	Bacillales	Bacillaceae	Anoxybacillus	Anoxybacillus flavithermus|1267580	Yes
	Firmicutes	Bacilli	Bacillales	Bacillaceae	Anoxybacillus	Anoxybacillus gonensis|198467	Yes
	Firmicutes	Bacilli	Bacillales	Bacillaceae	Anoxybacillus	Anoxybacillus kamchatkensis|1212546	Yes
	Firmicutes	Bacilli	Bacillales	Bacillaceae	Anoxybacillus	Anoxybacillus sp. BCO1|1548750	Yes
	Firmicutes	Bacilli	Bacillales	Bacillaceae	Anoxybacillus	Anoxybacillus tepidamans|1382358	Yes
	Firmicutes	Bacilli	Bacillales	Bacillaceae	Bacillus	Bacillus acidiproducens|444461	Yes
	Firmicutes	Bacilli	Bacillales	Bacillaceae	Bacillus	Bacillus aidingensis|1121085	Yes
	Firmicutes	Bacilli	Bacillales	Bacillaceae	Bacillus	Bacillus akibai|1236973	Yes
	Firmicutes	Bacilli	Bacillales	Bacillaceae	Bacillus	Bacillus alcalophilus|1218173	Yes
	Firmicutes	Bacilli	Bacillales	Bacillaceae	Bacillus	Bacillus altitudinis|293387	Yes
	Firmicutes	Bacilli	Bacillales	Bacillaceae	Bacillus	Bacillus amyloliquefaciens|1126211	Yes
	Firmicutes	Bacilli	Bacillales	Bacillaceae	Bacillus	Bacillus anthracis|198094	Yes
	Firmicutes	Bacilli	Bacillales	Bacillaceae	Bacillus	Bacillus aquimaris|189382	Yes
	Firmicutes	Bacilli	Bacillales	Bacillaceae	Bacillus	Bacillus atrophaeus|720555	Yes
	Firmicutes	Bacilli	Bacillales	Bacillaceae	Bacillus	Bacillus aurantiacus|1121086	Yes
	Firmicutes	Bacilli	Bacillales	Bacillaceae	Bacillus	Bacillus azotoformans|1131731	Yes
	Firmicutes	Bacilli	Bacillales	Bacillaceae	Bacillus	Bacillus bataviensis|1117379	Yes
	Firmicutes	Bacilli	Bacillales	Bacillaceae	Bacillus	Bacillus bogoriensis|1408424	Yes
	Firmicutes	Bacilli	Bacillales	Bacillaceae	Bacillus	Bacillus boroniphilus|1294265	Yes
	Firmicutes	Bacilli	Bacillales	Bacillaceae	Bacillus	Bacillus cellulosilyticus|649639	Yes
	Firmicutes	Bacilli	Bacillales	Bacillaceae	Bacillus	Bacillus cereus|226900	Yes
	Firmicutes	Bacilli	Bacillales	Bacillaceae	Bacillus	Bacillus chagannorensis|1121087	Yes
	Firmicutes	Bacilli	Bacillales	Bacillaceae	Bacillus	Bacillus cibi|265729	Yes
	Firmicutes	Bacilli	Bacillales	Bacillaceae	Bacillus	Bacillus clausii|66692	Yes
	Firmicutes	Bacilli	Bacillales	Bacillaceae	Bacillus	Bacillus coagulans|1298921	Yes
	Firmicutes	Bacilli	Bacillales	Bacillaceae	Bacillus	Bacillus coahuilensis|441769	Yes
	Firmicutes	Bacilli	Bacillales	Bacillaceae	Bacillus	Bacillus cytotoxicus|315749	Yes
	Firmicutes	Bacilli	Bacillales	Bacillaceae	Bacillus	Bacillus endophyticus|1196029	Yes
	Firmicutes	Bacilli	Bacillales	Bacillaceae	Bacillus	Bacillus firmus|1307436	Yes
	Firmicutes	Bacilli	Bacillales	Bacillaceae	Bacillus	Bacillus flexus|1444310	Yes
	Firmicutes	Bacilli	Bacillales	Bacillaceae	Bacillus	Bacillus fordii|1121090	Yes
	Firmicutes	Bacilli	Bacillales	Bacillaceae	Bacillus	Bacillus gaemokensis|574375	Yes
	Firmicutes	Bacilli	Bacillales	Bacillaceae	Bacillus	Bacillus ginsengihumi|935938	Yes
	Firmicutes	Bacilli	Bacillales	Bacillaceae	Bacillus	Bacillus halodurans|272558	Yes
	Firmicutes	Bacilli	Bacillales	Bacillaceae	Bacillus	Bacillus hemicellulosilyticus|1236971	Yes
	Firmicutes	Bacilli	Bacillales	Bacillaceae	Bacillus	Bacillus indicus|1458122	Yes
	Firmicutes	Bacilli	Bacillales	Bacillaceae	Bacillus	Bacillus infantis|1367477	Yes
	Firmicutes	Bacilli	Bacillales	Bacillaceae	Bacillus	Bacillus isronensis|1224748	Yes
	Firmicutes	Bacilli	Bacillales	Bacillaceae	Bacillus	Bacillus kribbensis|1121092	Yes
	Firmicutes	Bacilli	Bacillales	Bacillaceae	Bacillus	Bacillus lehensis|1246626	Yes
	Firmicutes	Bacilli	Bacillales	Bacillaceae	Bacillus	Bacillus licheniformis|766760	Yes
	Firmicutes	Bacilli	Bacillales	Bacillaceae	Bacillus	Bacillus manliponensis|574376	Yes
	Firmicutes	Bacilli	Bacillales	Bacillaceae	Bacillus	Bacillus mannanilyticus|1236954	Yes
	Firmicutes	Bacilli	Bacillales	Bacillaceae	Bacillus	Bacillus marmarensis|1188261	Yes
	Firmicutes	Bacilli	Bacillales	Bacillaceae	Bacillus	Bacillus massilioanorexius|1211814	Yes
	Firmicutes	Bacilli	Bacillales	Bacillaceae	Bacillus	Bacillus massiliosenegalensis|1034347	Yes
	Firmicutes	Bacilli	Bacillales	Bacillaceae	Bacillus	Bacillus megaterium|1348908	Yes
	Firmicutes	Bacilli	Bacillales	Bacillaceae	Bacillus	Bacillus methanolicus|796606	Yes
	Firmicutes	Bacilli	Bacillales	Bacillaceae	Bacillus	Bacillus methylotrophicus|1281778	Yes
	Firmicutes	Bacilli	Bacillales	Bacillaceae	Bacillus	Bacillus mojavensis|1051501	Yes
	Firmicutes	Bacilli	Bacillales	Bacillaceae	Bacillus	Bacillus mycoides|1405	Yes
	Firmicutes	Bacilli	Bacillales	Bacillaceae	Bacillus	Bacillus nealsonii|1202533	Yes
	Firmicutes	Bacilli	Bacillales	Bacillaceae	Bacillus	Bacillus oceanisediminis|1196031	Yes
	Firmicutes	Bacilli	Bacillales	Bacillaceae	Bacillus	Bacillus okhensis|333138	Yes
	Firmicutes	Bacilli	Bacillales	Bacillaceae	Bacillus	Bacillus panaciterrae|1121093	Yes
	Firmicutes	Bacilli	Bacillales	Bacillaceae	Bacillus	Bacillus pseudofirmus|398511	Yes
	Firmicutes	Bacilli	Bacillales	Bacillaceae	Bacillus	Bacillus pseudomycoides|527000	Yes
	Firmicutes	Bacilli	Bacillales	Bacillaceae	Bacillus	Bacillus pumilus|1423688	Yes
	Firmicutes	Bacilli	Bacillales	Bacillaceae	Bacillus	Bacillus safensis|1355022	Yes
	Firmicutes	Bacilli	Bacillales	Bacillaceae	Bacillus	Bacillus siamensis|1177185	Yes
	Firmicutes	Bacilli	Bacillales	Bacillaceae	Bacillus	Bacillus smithii|665952	Yes
	Firmicutes	Bacilli	Bacillales	Bacillaceae	Bacillus	Bacillus sonorensis|1220591	Yes
	Firmicutes	Bacilli	Bacillales	Bacillaceae	Bacillus	Bacillus sp. EGD-AK10|1386080	Yes
	Firmicutes	Bacilli	Bacillales	Bacillaceae	Bacillus	Bacillus stratosphericus|1236481	Yes
	Firmicutes	Bacilli	Bacillales	Bacillaceae	Bacillus	Bacillus subtilis|1302650	Yes
	Firmicutes	Bacilli	Bacillales	Bacillaceae	Bacillus	Bacillus tequilensis|1423686	Yes
	Firmicutes	Bacilli	Bacillales	Bacillaceae	Bacillus	Bacillus thermoamylovorans|35841	Yes
	Firmicutes	Bacilli	Bacillales	Bacillaceae	Bacillus	Bacillus thuringiensis|527021	Yes
	Firmicutes	Bacilli	Bacillales	Bacillaceae	Bacillus	Bacillus toyonensis|1415784	Yes
	Firmicutes	Bacilli	Bacillales	Bacillaceae	Bacillus	Bacillus vallismortis|1051502	Yes
	Firmicutes	Bacilli	Bacillales	Bacillaceae	Bacillus	Bacillus vireti|1131730	Yes
	Firmicutes	Bacilli	Bacillales	Bacillaceae	Bacillus	Bacillus wakoensis|1236970	Yes
	Firmicutes	Bacilli	Bacillales	Bacillaceae	Bacillus	Bacillus weihenstephanensis|1227359	Yes
	Firmicutes	Bacilli	Bacillales	Bacillaceae	Caldalkalibacillus	Caldalkalibacillus thermarum|986075	Yes
	Firmicutes	Bacilli	Bacillales	Bacillaceae	Caldibacillus	Caldibacillus debilis|1121917	Yes
	Firmicutes	Bacilli	Bacillales	Bacillaceae	Fictibacillus	Fictibacillus gelatini|1121091	Yes
	Firmicutes	Bacilli	Bacillales	Bacillaceae	Fictibacillus	Fictibacillus macauensis|1196324	Yes
	Firmicutes	Bacilli	Bacillales	Bacillaceae	Geobacillus	Geobacillus caldoxylosilyticus|1234664	Yes
	Firmicutes	Bacilli	Bacillales	Bacillaceae	Geobacillus	Geobacillus kaustophilus|1337888	Yes
	Firmicutes	Bacilli	Bacillales	Bacillaceae	Geobacillus	Geobacillus sp. Y4.1MC1|581103	Yes
	Firmicutes	Bacilli	Bacillales	Bacillaceae	Geobacillus	Geobacillus stearothermophilus|937593	Yes
	Firmicutes	Bacilli	Bacillales	Bacillaceae	Geobacillus	Geobacillus subterraneus|1382357	Yes
	Firmicutes	Bacilli	Bacillales	Bacillaceae	Geobacillus	Geobacillus thermocatenulatus|1444308	Yes
	Firmicutes	Bacilli	Bacillales	Bacillaceae	Geobacillus	Geobacillus thermodenitrificans|420246	Yes
	Firmicutes	Bacilli	Bacillales	Bacillaceae	Geobacillus	Geobacillus thermoglucosidasius|634956	Yes
	Firmicutes	Bacilli	Bacillales	Bacillaceae	Geobacillus	Geobacillus thermoleovorans|1111068	Yes
	Firmicutes	Bacilli	Bacillales	Bacillaceae	Geobacillus	Geobacillus vulcani|1382315	Yes
	Firmicutes	Bacilli	Bacillales	Bacillaceae	Gracilibacillus	Gracilibacillus boraciitolerans|1298598	Yes
	Firmicutes	Bacilli	Bacillales	Bacillaceae	Gracilibacillus	Gracilibacillus halophilus|1308866	Yes
	Firmicutes	Bacilli	Bacillales	Bacillaceae	Gracilibacillus	Gracilibacillus lacisalsi|1121929	Yes
	Firmicutes	Bacilli	Bacillales	Bacillaceae	Halalkalibacillus	Halalkalibacillus halophilus|1121936	Yes
	Firmicutes	Bacilli	Bacillales	Bacillaceae	Halobacillus	Halobacillus dabanensis|240302	Yes
	Firmicutes	Bacilli	Bacillales	Bacillaceae	Halobacillus	Halobacillus halophilus|866895	Yes
	Firmicutes	Bacilli	Bacillales	Bacillaceae	Halobacillus	Halobacillus karajensis|195088	Yes
	Firmicutes	Bacilli	Bacillales	Bacillaceae	Halobacillus	Halobacillus kuroshimensis|1121938	Yes
	Firmicutes	Bacilli	Bacillales	Bacillaceae	Halobacillus	Halobacillus sp. BBL2006|1543706	Yes
	Firmicutes	Bacilli	Bacillales	Bacillaceae	Halobacillus	Halobacillus trueperi|156205	Yes
	Firmicutes	Bacilli	Bacillales	Bacillaceae	Lentibacillus	Lentibacillus jeotgali|558169	Yes
	Firmicutes	Bacilli	Bacillales	Bacillaceae	Lysinibacillus	Lysinibacillus boronitolerans|1179224	Yes
	Firmicutes	Bacilli	Bacillales	Bacillaceae	Lysinibacillus	Lysinibacillus fusiformis|1416755	Yes
	Firmicutes	Bacilli	Bacillales	Bacillaceae	Lysinibacillus	Lysinibacillus manganicus|1384049	Yes
	Firmicutes	Bacilli	Bacillales	Bacillaceae	Lysinibacillus	Lysinibacillus massiliensis|1211035	Yes
	Firmicutes	Bacilli	Bacillales	Bacillaceae	Lysinibacillus	Lysinibacillus odysseyi|1220589	Yes
	Firmicutes	Bacilli	Bacillales	Bacillaceae	Lysinibacillus	Lysinibacillus sinduriensis|1384057	Yes
	Firmicutes	Bacilli	Bacillales	Bacillaceae	Lysinibacillus	Lysinibacillus sp. GY32|1145276	Yes
	Firmicutes	Bacilli	Bacillales	Bacillaceae	Lysinibacillus	Lysinibacillus sphaericus|444177	Yes
	Firmicutes	Bacilli	Bacillales	Bacillaceae	Marinococcus	Marinococcus halotolerans|1122203	Yes
	Firmicutes	Bacilli	Bacillales	Bacillaceae	Oceanobacillus	Oceanobacillus iheyensis|221109	Yes
	Firmicutes	Bacilli	Bacillales	Bacillaceae	Oceanobacillus	Oceanobacillus kimchii|1238184	Yes
	Firmicutes	Bacilli	Bacillales	Bacillaceae	Oceanobacillus	Oceanobacillus picturae|171693	Yes
	Firmicutes	Bacilli	Bacillales	Bacillaceae	Ornithinibacillus	Ornithinibacillus scapharcae|981383	Yes
	Firmicutes	Bacilli	Bacillales	Bacillaceae	Paucisalibacillus	Paucisalibacillus globulus|1122940	Yes
	Firmicutes	Bacilli	Bacillales	Bacillaceae	Pontibacillus	Pontibacillus chungwhensis|1385513	Yes
	Firmicutes	Bacilli	Bacillales	Bacillaceae	Pontibacillus	Pontibacillus halophilus|1385510	Yes
	Firmicutes	Bacilli	Bacillales	Bacillaceae	Pontibacillus	Pontibacillus litoralis|1385512	Yes
	Firmicutes	Bacilli	Bacillales	Bacillaceae	Pontibacillus	Pontibacillus marinus|1385511	Yes
	Firmicutes	Bacilli	Bacillales	Bacillaceae	Pontibacillus	Pontibacillus yanchengensis|1385514	Yes
	Firmicutes	Bacilli	Bacillales	Bacillaceae	Salimicrobium	Salimicrobium sp. MJ3|1230341	Yes
	Firmicutes	Bacilli	Bacillales	Bacillaceae	Salsuginibacillus	Salsuginibacillus kocurii|1123239	Yes
	Firmicutes	Bacilli	Bacillales	Bacillaceae	Sediminibacillus	Sediminibacillus halophilus|1401260	Yes
	Firmicutes	Bacilli	Bacillales	Bacillaceae	Terribacillus	Terribacillus aidingensis|586416	Yes
	Firmicutes	Bacilli	Bacillales	Bacillaceae	Thalassobacillus	Thalassobacillus devorans|1401258	Yes
	Firmicutes	Bacilli	Bacillales	Bacillaceae	Virgibacillus	Virgibacillus alimentarius|698769	Yes
	Firmicutes	Bacilli	Bacillales	Bacillaceae	Virgibacillus	Virgibacillus halodenitrificans|1196028	Yes
	Firmicutes	Bacilli	Bacillales	Bacillaceae	Virgibacillus	Virgibacillus sp. Vm-5|1462526	Yes
	Firmicutes	Bacilli	Bacillales	Bacillales Family X. Incertae Sedis	Thermicanus	Thermicanus aegyptius|1089548	Yes
	Firmicutes	Bacilli	Bacillales	Listeriaceae	Brochothrix	Brochothrix campestris|1265861	Yes
	Firmicutes	Bacilli	Bacillales	Listeriaceae	Brochothrix	Brochothrix thermosphacta|1121126	Yes
	Firmicutes	Bacilli	Bacillales	Listeriaceae	Listeria	Listeria aquatica|1265818	Yes
	Firmicutes	Bacilli	Bacillales	Listeriaceae	Listeria	Listeria cornellensis|1265820	Yes
	Firmicutes	Bacilli	Bacillales	Listeriaceae	Listeria	Listeria fleischmannii|1081736	Yes
	Firmicutes	Bacilli	Bacillales	Listeriaceae	Listeria	Listeria floridensis|1265817	Yes
	Firmicutes	Bacilli	Bacillales	Listeriaceae	Listeria	Listeria grandensis|1265819	Yes
	Firmicutes	Bacilli	Bacillales	Listeriaceae	Listeria	Listeria grayi|525367	Yes
	Firmicutes	Bacilli	Bacillales	Listeriaceae	Listeria	Listeria innocua|1642	Yes
	Firmicutes	Bacilli	Bacillales	Listeriaceae	Listeria	Listeria ivanovii|1457190	Yes
	Firmicutes	Bacilli	Bacillales	Listeriaceae	Listeria	Listeria monocytogenes|1389485	Yes
	Firmicutes	Bacilli	Bacillales	Listeriaceae	Listeria	Listeria riparia|1265816	Yes
	Firmicutes	Bacilli	Bacillales	Listeriaceae	Listeria	Listeria rocourtiae|1265846	Yes
	Firmicutes	Bacilli	Bacillales	Listeriaceae	Listeria	Listeria seeligeri|702453	Yes
	Firmicutes	Bacilli	Bacillales	Listeriaceae	Listeria	Listeria weihenstephanensis|1265845	Yes
	Firmicutes	Bacilli	Bacillales	Listeriaceae	Listeria	Listeria welshimeri|386043	Yes
	Firmicutes	Bacilli	Bacillales	Listeriaceae		Listeriaceae bacterium FSL A5-0209|1497679	Yes
	Firmicutes	Bacilli	Bacillales	Paenibacillaceae	Aneurinibacillus	Aneurinibacillus aneurinilyticus|649747	Yes
	Firmicutes	Bacilli	Bacillales	Paenibacillaceae	Aneurinibacillus	Aneurinibacillus terranovensis|1121002	Yes
	Firmicutes	Bacilli	Bacillales	Paenibacillaceae	Brevibacillus	Brevibacillus agri|1444307	Yes
	Firmicutes	Bacilli	Bacillales	Paenibacillaceae	Brevibacillus	Brevibacillus borstelensis|1444309	Yes
	Firmicutes	Bacilli	Bacillales	Paenibacillaceae	Brevibacillus	Brevibacillus brevis|358681	Yes
	Firmicutes	Bacilli	Bacillales	Paenibacillaceae	Brevibacillus	Brevibacillus laterosporus|1042163	Yes
	Firmicutes	Bacilli	Bacillales	Paenibacillaceae	Brevibacillus	Brevibacillus massiliensis|1118054	Yes
	Firmicutes	Bacilli	Bacillales	Paenibacillaceae	Brevibacillus	Brevibacillus panacihumi|1408254	Yes
	Firmicutes	Bacilli	Bacillales	Paenibacillaceae	Brevibacillus	Brevibacillus sp. BC25|1144308	Yes
	Firmicutes	Bacilli	Bacillales	Paenibacillaceae	Brevibacillus	Brevibacillus thermoruber|1346613	Yes
	Firmicutes	Bacilli	Bacillales	Paenibacillaceae	Cohnella	Cohnella laeviribosi|1121346	Yes
	Firmicutes	Bacilli	Bacillales	Paenibacillaceae	Cohnella	Cohnella panacarvi|979226	Yes
	Firmicutes	Bacilli	Bacillales	Paenibacillaceae	Cohnella	Cohnella thermotolerans|1121347	Yes
	Firmicutes	Bacilli	Bacillales	Paenibacillaceae	Paenibacillus	Paenibacillus alginolyticus|1122915	Yes
	Firmicutes	Bacilli	Bacillales	Paenibacillaceae	Paenibacillus	Paenibacillus alvei|1117109	Yes
	Firmicutes	Bacilli	Bacillales	Paenibacillaceae	Paenibacillus	Paenibacillus assamensis|1122916	Yes
	Firmicutes	Bacilli	Bacillales	Paenibacillaceae	Paenibacillus	Paenibacillus barengoltzii|1235795	Yes
	Firmicutes	Bacilli	Bacillales	Paenibacillaceae	Paenibacillus	Paenibacillus borealis|160799	Yes
	Firmicutes	Bacilli	Bacillales	Paenibacillaceae	Paenibacillus	Paenibacillus curdlanolyticus|717606	Yes
	Firmicutes	Bacilli	Bacillales	Paenibacillaceae	Paenibacillus	Paenibacillus daejeonensis|1122917	Yes
	Firmicutes	Bacilli	Bacillales	Paenibacillaceae	Paenibacillus	Paenibacillus darwinianus|1380763	Yes
	Firmicutes	Bacilli	Bacillales	Paenibacillaceae	Paenibacillus	Paenibacillus dendritiformis|1131935	Yes
	Firmicutes	Bacilli	Bacillales	Paenibacillaceae	Paenibacillus	Paenibacillus durus|1333534	Yes
	Firmicutes	Bacilli	Bacillales	Paenibacillaceae	Paenibacillus	Paenibacillus ehimensis|1444314	Yes
	Firmicutes	Bacilli	Bacillales	Paenibacillaceae	Paenibacillus	Paenibacillus elgii|1007103	Yes
	Firmicutes	Bacilli	Bacillales	Paenibacillaceae	Paenibacillus	Paenibacillus fonticola|1122918	Yes
	Firmicutes	Bacilli	Bacillales	Paenibacillaceae	Paenibacillus	Paenibacillus forsythiae|1333861	Yes
	Firmicutes	Bacilli	Bacillales	Paenibacillaceae	Paenibacillus	Paenibacillus ginsengihumi|1122919	Yes
	Firmicutes	Bacilli	Bacillales	Paenibacillaceae	Paenibacillus	Paenibacillus graminis|1333858	Yes
	Firmicutes	Bacilli	Bacillales	Paenibacillaceae	Paenibacillus	Paenibacillus harenae|1122920	Yes
	Firmicutes	Bacilli	Bacillales	Paenibacillaceae	Paenibacillus	Paenibacillus lactis|743719	Yes
	Firmicutes	Bacilli	Bacillales	Paenibacillaceae	Paenibacillus	Paenibacillus larvae|697284	Yes
	Firmicutes	Bacilli	Bacillales	Paenibacillaceae	Paenibacillus	Paenibacillus macerans|44252	Yes
	Firmicutes	Bacilli	Bacillales	Paenibacillaceae	Paenibacillus	Paenibacillus massiliensis|1122921	Yes
	Firmicutes	Bacilli	Bacillales	Paenibacillaceae	Paenibacillus	Paenibacillus mucilaginosus|997761	Yes
	Firmicutes	Bacilli	Bacillales	Paenibacillaceae	Paenibacillus	Paenibacillus odorifer|189426	Yes
	Firmicutes	Bacilli	Bacillales	Paenibacillaceae	Paenibacillus	Paenibacillus panacisoli|1122922	Yes
	Firmicutes	Bacilli	Bacillales	Paenibacillaceae	Paenibacillus	Paenibacillus pasadenensis|1122923	Yes
	Firmicutes	Bacilli	Bacillales	Paenibacillaceae	Paenibacillus	Paenibacillus peoriae|1087481	Yes
	Firmicutes	Bacilli	Bacillales	Paenibacillaceae	Paenibacillus	Paenibacillus pini|1236976	Yes
	Firmicutes	Bacilli	Bacillales	Paenibacillaceae	Paenibacillus	Paenibacillus pinihumi|1122924	Yes
	Firmicutes	Bacilli	Bacillales	Paenibacillaceae	Paenibacillus	Paenibacillus polymyxa|1333863	Yes
	Firmicutes	Bacilli	Bacillales	Paenibacillaceae	Paenibacillus	Paenibacillus popilliae|1212764	Yes
	Firmicutes	Bacilli	Bacillales	Paenibacillaceae	Paenibacillus	Paenibacillus sabinae|1268072	Yes
	Firmicutes	Bacilli	Bacillales	Paenibacillaceae	Paenibacillus	Paenibacillus sanguinis|1122925	Yes
	Firmicutes	Bacilli	Bacillales	Paenibacillaceae	Paenibacillus	Paenibacillus sp. FSL R7-269|1226755	Yes
	Firmicutes	Bacilli	Bacillales	Paenibacillaceae	Paenibacillus	Paenibacillus stellifer|169760	Yes
	Firmicutes	Bacilli	Bacillales	Paenibacillaceae	Paenibacillus	Paenibacillus taiwanensis|1122926	Yes
	Firmicutes	Bacilli	Bacillales	Paenibacillaceae	Paenibacillus	Paenibacillus terrae|985665	Yes
	Firmicutes	Bacilli	Bacillales	Paenibacillaceae	Paenibacillus	Paenibacillus terrigena|1122927	Yes
	Firmicutes	Bacilli	Bacillales	Paenibacillaceae	Paenibacillus	Paenibacillus vortex|715225	Yes
	Firmicutes	Bacilli	Bacillales	Paenibacillaceae	Paenibacillus	Paenibacillus wynnii|268407	Yes
	Firmicutes	Bacilli	Bacillales	Paenibacillaceae	Paenibacillus	Paenibacillus zanthoxyli|1333860	Yes
	Firmicutes	Bacilli	Bacillales	Paenibacillaceae	Saccharibacillus	Saccharibacillus kuerlensis|1123226	Yes
	Firmicutes	Bacilli	Bacillales	Paenibacillaceae	Thermobacillus	Thermobacillus composti|717605	Yes
	Firmicutes	Bacilli	Bacillales	Planococcaceae	Bhargavaea	Bhargavaea cecembensis|1235279	Yes
	Firmicutes	Bacilli	Bacillales	Planococcaceae	Kurthia	Kurthia huakuii|1334046	Yes
	Firmicutes	Bacilli	Bacillales	Planococcaceae	Paenisporosarcina	Paenisporosarcina sp. TG20|1211706	Yes
	Firmicutes	Bacilli	Bacillales	Planococcaceae	Planococcus	Planococcus antarcticus|1185653	Yes
	Firmicutes	Bacilli	Bacillales	Planococcaceae	Planococcus	Planococcus donghaensis|933115	Yes
	Firmicutes	Bacilli	Bacillales	Planococcaceae	Planococcus	Planococcus halocryophilus|1005941	Yes
	Firmicutes	Bacilli	Bacillales	Planococcaceae	Planococcus	Planococcus sp. CAU13|1541197	Yes
	Firmicutes	Bacilli	Bacillales	Planococcaceae	Planomicrobium	Planomicrobium glaciei|1273538	Yes
	Firmicutes	Bacilli	Bacillales	Planococcaceae	Solibacillus	Solibacillus silvestris|1002809	Yes
	Firmicutes	Bacilli	Bacillales	Planococcaceae	Sporosarcina	Sporosarcina newyorkensis|1027292	Yes
	Firmicutes	Bacilli	Bacillales	Planococcaceae	Sporosarcina	Sporosarcina pasteurii|1415631	Yes
	Firmicutes	Bacilli	Bacillales	Planococcaceae	Sporosarcina	Sporosarcina sp. D27|1382305	Yes
	Firmicutes	Bacilli	Bacillales	Planococcaceae	Sporosarcina	Sporosarcina ureae|1123290	Yes
	Firmicutes	Bacilli	Bacillales	Planococcaceae	Ureibacillus	Ureibacillus thermosphaericus|1160707	Yes
	Firmicutes	Bacilli	Bacillales	Planococcaceae	Viridibacillus	Viridibacillus arenosi|1227360	Yes
	Firmicutes	Bacilli	Bacillales	Sporolactobacillaceae	Sporolactobacillus	Sporolactobacillus inulinus|1069536	Yes
	Firmicutes	Bacilli	Bacillales	Sporolactobacillaceae	Sporolactobacillus	Sporolactobacillus laevolacticus|1395513	Yes
	Firmicutes	Bacilli	Bacillales	Sporolactobacillaceae	Sporolactobacillus	Sporolactobacillus terrae|1444306	Yes
	Firmicutes	Bacilli	Bacillales	Sporolactobacillaceae	Sporolactobacillus	Sporolactobacillus vineae|1123284	Yes
	Firmicutes	Bacilli	Bacillales	Sporolactobacillaceae	Tuberibacillus	Tuberibacillus calidus|1123405	Yes
	Firmicutes	Bacilli	Bacillales	Sporolactobacillaceae		[Bacillus] selenitireducens|439292	Yes
	Firmicutes	Bacilli	Bacillales	Staphylococcaceae	Jeotgalicoccus	Jeotgalicoccus marinus|1122128	Yes
	Firmicutes	Bacilli	Bacillales	Staphylococcaceae	Jeotgalicoccus	Jeotgalicoccus psychrophilus|1122129	Yes
	Firmicutes	Bacilli	Bacillales	Staphylococcaceae	Jeotgalicoccus	Jeotgalicoccus sp. 13MG44_air|1461582	Yes
	Firmicutes	Bacilli	Bacillales	Staphylococcaceae	Macrococcus	Macrococcus caseolyticus|458233	Yes
	Firmicutes	Bacilli	Bacillales	Staphylococcaceae	Salinicoccus	Salinicoccus albus|1123230	Yes
	Firmicutes	Bacilli	Bacillales	Staphylococcaceae	Salinicoccus	Salinicoccus carnicancri|1235755	Yes
	Firmicutes	Bacilli	Bacillales	Staphylococcaceae	Salinicoccus	Salinicoccus luteus|1123233	Yes
	Firmicutes	Bacilli	Bacillales	Staphylococcaceae	Staphylococcus	Staphylococcus agnetis|985762	Yes
	Firmicutes	Bacilli	Bacillales	Staphylococcaceae	Staphylococcus	Staphylococcus arlettae|1212545	Yes
	Firmicutes	Bacilli	Bacillales	Staphylococcaceae	Staphylococcus	Staphylococcus aureus|1418425	Yes
	Firmicutes	Bacilli	Bacillales	Staphylococcaceae	Staphylococcus	Staphylococcus capitis|29388	Yes
	Firmicutes	Bacilli	Bacillales	Staphylococcaceae	Staphylococcus	Staphylococcus caprae|525378	Yes
	Firmicutes	Bacilli	Bacillales	Staphylococcaceae	Staphylococcus	Staphylococcus carnosus|396513	Yes
	Firmicutes	Bacilli	Bacillales	Staphylococcaceae	Staphylococcus	Staphylococcus chromogenes|1220551	Yes
	Firmicutes	Bacilli	Bacillales	Staphylococcaceae	Staphylococcus	Staphylococcus delphini|1141105	Yes
	Firmicutes	Bacilli	Bacillales	Staphylococcaceae	Staphylococcus	Staphylococcus epidermidis|1388003	Yes
	Firmicutes	Bacilli	Bacillales	Staphylococcaceae	Staphylococcus	Staphylococcus equorum|1159488	Yes
	Firmicutes	Bacilli	Bacillales	Staphylococcaceae	Staphylococcus	Staphylococcus haemolyticus|1283	Yes
	Firmicutes	Bacilli	Bacillales	Staphylococcaceae	Staphylococcus	Staphylococcus hominis|1185421	Yes
	Firmicutes	Bacilli	Bacillales	Staphylococcaceae	Staphylococcus	Staphylococcus intermedius|1141106	Yes
	Firmicutes	Bacilli	Bacillales	Staphylococcaceae	Staphylococcus	Staphylococcus lentus|1179226	Yes
	Firmicutes	Bacilli	Bacillales	Staphylococcaceae	Staphylococcus	Staphylococcus lugdunensis|883164	Yes
	Firmicutes	Bacilli	Bacillales	Staphylococcaceae	Staphylococcus	Staphylococcus massiliensis|1229783	Yes
	Firmicutes	Bacilli	Bacillales	Staphylococcaceae	Staphylococcus	Staphylococcus pasteuri|1276282	Yes
	Firmicutes	Bacilli	Bacillales	Staphylococcaceae	Staphylococcus	Staphylococcus pettenkoferi|904314	Yes
	Firmicutes	Bacilli	Bacillales	Staphylococcaceae	Staphylococcus	Staphylococcus pseudintermedius|1286307	Yes
	Firmicutes	Bacilli	Bacillales	Staphylococcaceae	Staphylococcus	Staphylococcus saprophyticus|1131257	Yes
	Firmicutes	Bacilli	Bacillales	Staphylococcaceae	Staphylococcus	Staphylococcus sciuri|1232666	Yes
	Firmicutes	Bacilli	Bacillales	Staphylococcaceae	Staphylococcus	Staphylococcus simiae|911238	Yes
	Firmicutes	Bacilli	Bacillales	Staphylococcaceae	Staphylococcus	Staphylococcus simulans|883166	Yes
	Firmicutes	Bacilli	Bacillales	Staphylococcaceae	Staphylococcus	Staphylococcus sp. MDS7B|1209359	Yes
	Firmicutes	Bacilli	Bacillales	Staphylococcaceae	Staphylococcus	Staphylococcus vitulinus|1167632	Yes
	Firmicutes	Bacilli	Bacillales	Staphylococcaceae	Staphylococcus	Staphylococcus warneri|1292	Yes
	Firmicutes	Bacilli	Bacillales	Staphylococcaceae	Staphylococcus	Staphylococcus xylosus|1353979	Yes
	Firmicutes	Bacilli	Bacillales	Thermoactinomycetaceae	Desmospora	Desmospora sp. 8437|997346	Yes
	Firmicutes	Bacilli	Bacillales	Thermoactinomycetaceae	Laceyella	Laceyella sacchari|1341151	Yes
	Firmicutes	Bacilli	Bacillales	Thermoactinomycetaceae	Shimazuella	Shimazuella kribbensis|1123252	Yes
	Firmicutes	Bacilli	Bacillales	Thermoactinomycetaceae	Thermoactinomyces	Thermoactinomyces daqus|1329516	Yes
	Firmicutes	Bacilli	Bacillales	Thermoactinomycetaceae	Thermoactinomyces	Thermoactinomyces sp. Gus2-1|1535750	Yes
	Firmicutes	Bacilli	Bacillales		Exiguobacterium	Exiguobacterium acetylicum|1397697	Yes
	Firmicutes	Bacilli	Bacillales		Exiguobacterium	Exiguobacterium antarcticum|1397700	Yes
	Firmicutes	Bacilli	Bacillales		Exiguobacterium	Exiguobacterium aurantiacum|1397694	Yes
	Firmicutes	Bacilli	Bacillales		Exiguobacterium	Exiguobacterium marinum|1397696	Yes
	Firmicutes	Bacilli	Bacillales		Exiguobacterium	Exiguobacterium mexicanum|340146	Yes
	Firmicutes	Bacilli	Bacillales		Exiguobacterium	Exiguobacterium oxidotolerans|1397699	Yes
	Firmicutes	Bacilli	Bacillales		Exiguobacterium	Exiguobacterium pavilionensis|1345023	Yes
	Firmicutes	Bacilli	Bacillales		Exiguobacterium	Exiguobacterium sibiricum|1397698	Yes
	Firmicutes	Bacilli	Bacillales		Exiguobacterium	Exiguobacterium sp. S17|856854	Yes
	Firmicutes	Bacilli	Bacillales		Exiguobacterium	Exiguobacterium undae|1397695	Yes
	Firmicutes	Bacilli	Bacillales		Gemella	Gemella bergeri|1321820	Yes
	Firmicutes	Bacilli	Bacillales		Gemella	Gemella cuniculi|1121914	Yes
	Firmicutes	Bacilli	Bacillales		Gemella	Gemella haemolysans|562981	Yes
	Firmicutes	Bacilli	Bacillales		Gemella	Gemella morbillorum|562982	Yes
	Firmicutes	Bacilli	Bacillales		Gemella	Gemella sanguinis|1408440	Yes
	Firmicutes	Bacilli	Bacillales			Geomicrobium sp. JCM 19055|1460649	Yes
	Firmicutes	Bacilli	Lactobacillales	Aerococcaceae	Abiotrophia	Abiotrophia defectiva|592010	Yes
	Firmicutes	Bacilli	Lactobacillales	Aerococcaceae	Aerococcus	Aerococcus urinaeequi|1120952	Yes
	Firmicutes	Bacilli	Lactobacillales	Aerococcaceae	Aerococcus	Aerococcus viridans|655812	Yes
	Firmicutes	Bacilli	Lactobacillales	Aerococcaceae	Eremococcus	Eremococcus coleocola|908337	Yes
	Firmicutes	Bacilli	Lactobacillales	Aerococcaceae	Facklamia	Facklamia hominis|883111	Yes
	Firmicutes	Bacilli	Lactobacillales	Aerococcaceae	Facklamia	Facklamia ignava|883112	Yes
	Firmicutes	Bacilli	Lactobacillales	Aerococcaceae	Facklamia	Facklamia languida|883113	Yes
	Firmicutes	Bacilli	Lactobacillales	Aerococcaceae	Facklamia	Facklamia sourekii|1408438	Yes
	Firmicutes	Bacilli	Lactobacillales	Carnobacteriaceae	Alkalibacterium	Alkalibacterium sp. AK22|1229520	Yes
	Firmicutes	Bacilli	Lactobacillales	Carnobacteriaceae	Allofustis	Allofustis seminis|1120978	Yes
	Firmicutes	Bacilli	Lactobacillales	Carnobacteriaceae	Alloiococcus	Alloiococcus otitis|883081	Yes
	Firmicutes	Bacilli	Lactobacillales	Carnobacteriaceae	Atopobacter	Atopobacter phocae|1336234	Yes
	Firmicutes	Bacilli	Lactobacillales	Carnobacteriaceae	Atopococcus	Atopococcus tabaci|1121024	Yes
	Firmicutes	Bacilli	Lactobacillales	Carnobacteriaceae	Carnobacterium	Carnobacterium jeotgali|545534	Yes
	Firmicutes	Bacilli	Lactobacillales	Carnobacteriaceae	Carnobacterium	Carnobacterium maltaromaticum|1234679	Yes
	Firmicutes	Bacilli	Lactobacillales	Carnobacteriaceae	Carnobacterium	Carnobacterium sp. 17-4|208596	Yes
	Firmicutes	Bacilli	Lactobacillales	Carnobacteriaceae	Dolosigranulum	Dolosigranulum pigrum|883103	Yes
	Firmicutes	Bacilli	Lactobacillales	Carnobacteriaceae	Granulicatella	Granulicatella adiacens|638301	Yes
	Firmicutes	Bacilli	Lactobacillales	Carnobacteriaceae	Granulicatella	Granulicatella elegans|626369	Yes
	Firmicutes	Bacilli	Lactobacillales	Carnobacteriaceae	Lacticigenium	Lacticigenium naphtae|1122143	Yes
	Firmicutes	Bacilli	Lactobacillales	Enterococcaceae	Bavariicoccus	Bavariicoccus seileri|1121105	Yes
	Firmicutes	Bacilli	Lactobacillales	Enterococcaceae	Catellicoccus	Catellicoccus marimammalium|1234409	Yes
	Firmicutes	Bacilli	Lactobacillales	Enterococcaceae	Enterococcus	Enterococcus asini|1158606	Yes
	Firmicutes	Bacilli	Lactobacillales	Enterococcaceae	Enterococcus	Enterococcus avium|1140002	Yes
	Firmicutes	Bacilli	Lactobacillales	Enterococcaceae	Enterococcus	Enterococcus caccae|1158612	Yes
	Firmicutes	Bacilli	Lactobacillales	Enterococcaceae	Enterococcus	Enterococcus casseliflavus|1259825	Yes
	Firmicutes	Bacilli	Lactobacillales	Enterococcaceae	Enterococcus	Enterococcus cecorum|1121864	Yes
	Firmicutes	Bacilli	Lactobacillales	Enterococcaceae	Enterococcus	Enterococcus columbae|1121865	Yes
	Firmicutes	Bacilli	Lactobacillales	Enterococcaceae	Enterococcus	Enterococcus dispar|1139219	Yes
	Firmicutes	Bacilli	Lactobacillales	Enterococcaceae	Enterococcus	Enterococcus durans|883162	Yes
	Firmicutes	Bacilli	Lactobacillales	Enterococcaceae	Enterococcus	Enterococcus faecalis|1260366	Yes
	Firmicutes	Bacilli	Lactobacillales	Enterococcaceae	Enterococcus	Enterococcus faecium|1442605	Yes
	Firmicutes	Bacilli	Lactobacillales	Enterococcaceae	Enterococcus	Enterococcus gallinarum|1353	Yes
	Firmicutes	Bacilli	Lactobacillales	Enterococcaceae	Enterococcus	Enterococcus gilvus|1158614	Yes
	Firmicutes	Bacilli	Lactobacillales	Enterococcaceae	Enterococcus	Enterococcus haemoperoxidus|1158608	Yes
	Firmicutes	Bacilli	Lactobacillales	Enterococcaceae	Enterococcus	Enterococcus hirae|768486	Yes
	Firmicutes	Bacilli	Lactobacillales	Enterococcaceae	Enterococcus	Enterococcus italicus|888064	Yes
	Firmicutes	Bacilli	Lactobacillales	Enterococcaceae	Enterococcus	Enterococcus malodoratus|1158601	Yes
	Firmicutes	Bacilli	Lactobacillales	Enterococcaceae	Enterococcus	Enterococcus moraviensis|1158609	Yes
	Firmicutes	Bacilli	Lactobacillales	Enterococcaceae	Enterococcus	Enterococcus mundtii|1072576	Yes
	Firmicutes	Bacilli	Lactobacillales	Enterococcaceae	Enterococcus	Enterococcus pallens|1158607	Yes
	Firmicutes	Bacilli	Lactobacillales	Enterococcaceae	Enterococcus	Enterococcus phoeniculicola|1158610	Yes
	Firmicutes	Bacilli	Lactobacillales	Enterococcaceae	Enterococcus	Enterococcus raffinosus|1158602	Yes
	Firmicutes	Bacilli	Lactobacillales	Enterococcaceae	Enterococcus	Enterococcus saccharolyticus|742813	Yes
	Firmicutes	Bacilli	Lactobacillales	Enterococcaceae	Enterococcus	Enterococcus sp. HSIEG1|1316414	Yes
	Firmicutes	Bacilli	Lactobacillales	Enterococcaceae	Enterococcus	Enterococcus sulfureus|1140003	Yes
	Firmicutes	Bacilli	Lactobacillales	Enterococcaceae	Enterococcus	Enterococcus villorum|1158604	Yes
	Firmicutes	Bacilli	Lactobacillales	Enterococcaceae	Melissococcus	Melissococcus plutonius|940190	Yes
	Firmicutes	Bacilli	Lactobacillales	Enterococcaceae	Tetragenococcus	Tetragenococcus halophilus|945021	Yes
	Firmicutes	Bacilli	Lactobacillales	Enterococcaceae	Tetragenococcus	Tetragenococcus muriaticus|1123359	Yes
	Firmicutes	Bacilli	Lactobacillales	Enterococcaceae	Vagococcus	Vagococcus lutrae|1408226	Yes
	Firmicutes	Bacilli	Lactobacillales	Lactobacillaceae	Lactobacillus	Lactobacillus acidipiscis|1046599	Yes
	Firmicutes	Bacilli	Lactobacillales	Lactobacillaceae	Lactobacillus	Lactobacillus acidophilus|525306	Yes
	Firmicutes	Bacilli	Lactobacillales	Lactobacillaceae	Lactobacillus	Lactobacillus amylolyticus|585524	Yes
	Firmicutes	Bacilli	Lactobacillales	Lactobacillaceae	Lactobacillus	Lactobacillus amylovorus|695560	Yes
	Firmicutes	Bacilli	Lactobacillales	Lactobacillaceae	Lactobacillus	Lactobacillus animalis|930942	Yes
	Firmicutes	Bacilli	Lactobacillales	Lactobacillaceae	Lactobacillus	Lactobacillus antri|525309	Yes
	Firmicutes	Bacilli	Lactobacillales	Lactobacillaceae	Lactobacillus	Lactobacillus apodemi|1423724	Yes
	Firmicutes	Bacilli	Lactobacillales	Lactobacillaceae	Lactobacillus	Lactobacillus brevis|649758	Yes
	Firmicutes	Bacilli	Lactobacillales	Lactobacillaceae	Lactobacillus	Lactobacillus buchneri|525318	Yes
	Firmicutes	Bacilli	Lactobacillales	Lactobacillaceae	Lactobacillus	Lactobacillus casei|1423732	Yes
	Firmicutes	Bacilli	Lactobacillales	Lactobacillaceae	Lactobacillus	Lactobacillus ceti|1122146	Yes
	Firmicutes	Bacilli	Lactobacillales	Lactobacillaceae	Lactobacillus	Lactobacillus coleohominis|575594	Yes
	Firmicutes	Bacilli	Lactobacillales	Lactobacillaceae	Lactobacillus	Lactobacillus composti|1423734	Yes
	Firmicutes	Bacilli	Lactobacillales	Lactobacillaceae	Lactobacillus	Lactobacillus coryniformis|1185325	Yes
	Firmicutes	Bacilli	Lactobacillales	Lactobacillaceae	Lactobacillus	Lactobacillus crispatus|575596	Yes
	Firmicutes	Bacilli	Lactobacillales	Lactobacillaceae	Lactobacillus	Lactobacillus curieae|1138822	Yes
	Firmicutes	Bacilli	Lactobacillales	Lactobacillaceae	Lactobacillus	Lactobacillus curvatus|1074451	Yes
	Firmicutes	Bacilli	Lactobacillales	Lactobacillaceae	Lactobacillus	Lactobacillus delbrueckii|1217420	Yes
	Firmicutes	Bacilli	Lactobacillales	Lactobacillaceae	Lactobacillus	Lactobacillus equi|1423740	Yes
	Firmicutes	Bacilli	Lactobacillales	Lactobacillaceae	Lactobacillus	Lactobacillus equicursoris|1293597	Yes
	Firmicutes	Bacilli	Lactobacillales	Lactobacillaceae	Lactobacillus	Lactobacillus fabifermentans|1413187	Yes
	Firmicutes	Bacilli	Lactobacillales	Lactobacillaceae	Lactobacillus	Lactobacillus farciminis|936140	Yes
	Firmicutes	Bacilli	Lactobacillales	Lactobacillaceae	Lactobacillus	Lactobacillus farraginis|1423743	Yes
	Firmicutes	Bacilli	Lactobacillales	Lactobacillaceae	Lactobacillus	Lactobacillus fermentum|1366052	Yes
	Firmicutes	Bacilli	Lactobacillales	Lactobacillaceae	Lactobacillus	Lactobacillus florum|1221537	Yes
	Firmicutes	Bacilli	Lactobacillales	Lactobacillaceae	Lactobacillus	Lactobacillus fructivorans|941770	Yes
	Firmicutes	Bacilli	Lactobacillales	Lactobacillaceae	Lactobacillus	Lactobacillus fuchuensis|1423747	Yes
	Firmicutes	Bacilli	Lactobacillales	Lactobacillaceae	Lactobacillus	Lactobacillus gallinarum|1423748	Yes
	Firmicutes	Bacilli	Lactobacillales	Lactobacillaceae	Lactobacillus	Lactobacillus gasseri|1346615	Yes
	Firmicutes	Bacilli	Lactobacillales	Lactobacillaceae	Lactobacillus	Lactobacillus gastricus|1144300	Yes
	Firmicutes	Bacilli	Lactobacillales	Lactobacillaceae	Lactobacillus	Lactobacillus gigeriorum|1423751	Yes
	Firmicutes	Bacilli	Lactobacillales	Lactobacillaceae	Lactobacillus	Lactobacillus hamsteri|1423754	Yes
	Firmicutes	Bacilli	Lactobacillales	Lactobacillaceae	Lactobacillus	Lactobacillus harbinensis|1122147	Yes
	Firmicutes	Bacilli	Lactobacillales	Lactobacillaceae	Lactobacillus	Lactobacillus hayakitensis|1423755	Yes
	Firmicutes	Bacilli	Lactobacillales	Lactobacillaceae	Lactobacillus	Lactobacillus helveticus|585520	Yes
	Firmicutes	Bacilli	Lactobacillales	Lactobacillaceae	Lactobacillus	Lactobacillus hilgardii|1423757	Yes
	Firmicutes	Bacilli	Lactobacillales	Lactobacillaceae	Lactobacillus	Lactobacillus hominis|1423758	Yes
	Firmicutes	Bacilli	Lactobacillales	Lactobacillaceae	Lactobacillus	Lactobacillus iners|525328	Yes
	Firmicutes	Bacilli	Lactobacillales	Lactobacillaceae	Lactobacillus	Lactobacillus jensenii|1381119	Yes
	Firmicutes	Bacilli	Lactobacillales	Lactobacillaceae	Lactobacillus	Lactobacillus johnsonii|525330	Yes
	Firmicutes	Bacilli	Lactobacillales	Lactobacillaceae	Lactobacillus	Lactobacillus kefiranofaciens|1423827	Yes
	Firmicutes	Bacilli	Lactobacillales	Lactobacillaceae	Lactobacillus	Lactobacillus kisonensis|797516	Yes
	Firmicutes	Bacilli	Lactobacillales	Lactobacillaceae	Lactobacillus	Lactobacillus kitasatonis|1423767	Yes
	Firmicutes	Bacilli	Lactobacillales	Lactobacillaceae	Lactobacillus	Lactobacillus kunkeei|1419324	Yes
	Firmicutes	Bacilli	Lactobacillales	Lactobacillaceae	Lactobacillus	Lactobacillus malefermentans|1122149	Yes
	Firmicutes	Bacilli	Lactobacillales	Lactobacillaceae	Lactobacillus	Lactobacillus mali|1046596	Yes
	Firmicutes	Bacilli	Lactobacillales	Lactobacillaceae	Lactobacillus	Lactobacillus mucosae|1130798	Yes
	Firmicutes	Bacilli	Lactobacillales	Lactobacillaceae	Lactobacillus	Lactobacillus murinus|1235801	Yes
	Firmicutes	Bacilli	Lactobacillales	Lactobacillaceae	Lactobacillus	Lactobacillus namurensis|1302286	Yes
	Firmicutes	Bacilli	Lactobacillales	Lactobacillaceae	Lactobacillus	Lactobacillus nodensis|1423775	Yes
	Firmicutes	Bacilli	Lactobacillales	Lactobacillaceae	Lactobacillus	Lactobacillus oris|944562	Yes
	Firmicutes	Bacilli	Lactobacillales	Lactobacillaceae	Lactobacillus	Lactobacillus oryzae|1291743	Yes
	Firmicutes	Bacilli	Lactobacillales	Lactobacillaceae	Lactobacillus	Lactobacillus otakiensis|1423780	Yes
	Firmicutes	Bacilli	Lactobacillales	Lactobacillaceae	Lactobacillus	Lactobacillus parabrevis|1267003	Yes
	Firmicutes	Bacilli	Lactobacillales	Lactobacillaceae	Lactobacillus	Lactobacillus paracasei|1226299	Yes
	Firmicutes	Bacilli	Lactobacillales	Lactobacillaceae	Lactobacillus	Lactobacillus parafarraginis|797515	Yes
	Firmicutes	Bacilli	Lactobacillales	Lactobacillaceae	Lactobacillus	Lactobacillus paralimentarius|1122151	Yes
	Firmicutes	Bacilli	Lactobacillales	Lactobacillaceae	Lactobacillus	Lactobacillus paraplantarum|60520	Yes
	Firmicutes	Bacilli	Lactobacillales	Lactobacillaceae	Lactobacillus	Lactobacillus pasteurii|1423790	Yes
	Firmicutes	Bacilli	Lactobacillales	Lactobacillaceae	Lactobacillus	Lactobacillus pentosus|1136177	Yes
	Firmicutes	Bacilli	Lactobacillales	Lactobacillaceae	Lactobacillus	Lactobacillus plantarum|220668	Yes
	Firmicutes	Bacilli	Lactobacillales	Lactobacillaceae	Lactobacillus	Lactobacillus pobuzihii|1242253	Yes
	Firmicutes	Bacilli	Lactobacillales	Lactobacillaceae	Lactobacillus	Lactobacillus psittaci|1122152	Yes
	Firmicutes	Bacilli	Lactobacillales	Lactobacillaceae	Lactobacillus	Lactobacillus reuteri|927703	Yes
	Firmicutes	Bacilli	Lactobacillales	Lactobacillaceae	Lactobacillus	Lactobacillus rhamnosus|1286405	Yes
	Firmicutes	Bacilli	Lactobacillales	Lactobacillaceae	Lactobacillus	Lactobacillus rossiae|1114972	Yes
	Firmicutes	Bacilli	Lactobacillales	Lactobacillaceae	Lactobacillus	Lactobacillus ruminis|525362	Yes
	Firmicutes	Bacilli	Lactobacillales	Lactobacillaceae	Lactobacillus	Lactobacillus saerimneri|1227363	Yes
	Firmicutes	Bacilli	Lactobacillales	Lactobacillaceae	Lactobacillus	Lactobacillus sakei|1423833	Yes
	Firmicutes	Bacilli	Lactobacillales	Lactobacillaceae	Lactobacillus	Lactobacillus salivarius|768728	Yes
	Firmicutes	Bacilli	Lactobacillales	Lactobacillaceae	Lactobacillus	Lactobacillus sanfranciscensis|714313	Yes
	Firmicutes	Bacilli	Lactobacillales	Lactobacillaceae	Lactobacillus	Lactobacillus shenzhenensis|1231336	Yes
	Firmicutes	Bacilli	Lactobacillales	Lactobacillaceae	Lactobacillus	Lactobacillus sp. wkB10|1545701	Yes
	Firmicutes	Bacilli	Lactobacillales	Lactobacillaceae	Lactobacillus	Lactobacillus sucicola|1423806	Yes
	Firmicutes	Bacilli	Lactobacillales	Lactobacillaceae	Lactobacillus	Lactobacillus suebicus|1423807	Yes
	Firmicutes	Bacilli	Lactobacillales	Lactobacillaceae	Lactobacillus	Lactobacillus ultunensis|525365	Yes
	Firmicutes	Bacilli	Lactobacillales	Lactobacillaceae	Lactobacillus	Lactobacillus vaginalis|1423814	Yes
	Firmicutes	Bacilli	Lactobacillales	Lactobacillaceae	Lactobacillus	Lactobacillus versmoldensis|1423815	Yes
	Firmicutes	Bacilli	Lactobacillales	Lactobacillaceae	Lactobacillus	Lactobacillus vini|1133569	Yes
	Firmicutes	Bacilli	Lactobacillales	Lactobacillaceae	Lactobacillus	Lactobacillus zeae|1423816	Yes
	Firmicutes	Bacilli	Lactobacillales	Lactobacillaceae	Pediococcus	Pediococcus acidilactici|1384067	Yes
	Firmicutes	Bacilli	Lactobacillales	Lactobacillaceae	Pediococcus	Pediococcus claussenii|701521	Yes
	Firmicutes	Bacilli	Lactobacillales	Lactobacillaceae	Pediococcus	Pediococcus lolii|1229281	Yes
	Firmicutes	Bacilli	Lactobacillales	Lactobacillaceae	Pediococcus	Pediococcus pentosaceus|1460385	Yes
	Firmicutes	Bacilli	Lactobacillales	Lactobacillaceae	Sharpea	Sharpea azabuensis|1410674	Yes
	Firmicutes	Bacilli	Lactobacillales	Leuconostocaceae	Fructobacillus	Fructobacillus fructosus|930946	Yes
	Firmicutes	Bacilli	Lactobacillales	Leuconostocaceae	Leuconostoc	Leuconostoc carnosum|1229758	Yes
	Firmicutes	Bacilli	Lactobacillales	Leuconostocaceae	Leuconostoc	Leuconostoc citreum|1108974	Yes
	Firmicutes	Bacilli	Lactobacillales	Leuconostocaceae	Leuconostoc	Leuconostoc gasicomitatum|762550	Yes
	Firmicutes	Bacilli	Lactobacillales	Leuconostocaceae	Leuconostoc	Leuconostoc gelidum|927691	Yes
	Firmicutes	Bacilli	Lactobacillales	Leuconostocaceae	Leuconostoc	Leuconostoc inhae|927694	Yes
	Firmicutes	Bacilli	Lactobacillales	Leuconostocaceae	Leuconostoc	Leuconostoc kimchii|762051	Yes
	Firmicutes	Bacilli	Lactobacillales	Leuconostocaceae	Leuconostoc	Leuconostoc lactis|1246	Yes
	Firmicutes	Bacilli	Lactobacillales	Leuconostocaceae	Leuconostoc	Leuconostoc mesenteroides|1234889	Yes
	Firmicutes	Bacilli	Lactobacillales	Leuconostocaceae	Leuconostoc	Leuconostoc pseudomesenteroides|1154757	Yes
	Firmicutes	Bacilli	Lactobacillales	Leuconostocaceae	Leuconostoc	Leuconostoc sp. C2|979982	Yes
	Firmicutes	Bacilli	Lactobacillales	Leuconostocaceae	Oenococcus	Oenococcus kitaharae|1045004	Yes
	Firmicutes	Bacilli	Lactobacillales	Leuconostocaceae	Oenococcus	Oenococcus oeni|1428445	Yes
	Firmicutes	Bacilli	Lactobacillales	Leuconostocaceae	Oenococcus	Oenococcus sp. M7.2.18|931074	Yes
	Firmicutes	Bacilli	Lactobacillales	Leuconostocaceae	Weissella	Weissella ceti|1238674	Yes
	Firmicutes	Bacilli	Lactobacillales	Leuconostocaceae	Weissella	Weissella cibaria|911104	Yes
	Firmicutes	Bacilli	Lactobacillales	Leuconostocaceae	Weissella	Weissella confusa|1127131	Yes
	Firmicutes	Bacilli	Lactobacillales	Leuconostocaceae	Weissella	Weissella halotolerans|1123500	Yes
	Firmicutes	Bacilli	Lactobacillales	Leuconostocaceae	Weissella	Weissella koreensis|1123721	Yes
	Firmicutes	Bacilli	Lactobacillales	Leuconostocaceae	Weissella	Weissella oryzae|1329250	Yes
	Firmicutes	Bacilli	Lactobacillales	Leuconostocaceae	Weissella	Weissella paramesenteroides|585506	Yes
	Firmicutes	Bacilli	Lactobacillales	Streptococcaceae	Lactococcus	Lactococcus garvieae|1380772	Yes
	Firmicutes	Bacilli	Lactobacillales	Streptococcaceae	Lactococcus	Lactococcus lactis|44688	Yes
	Firmicutes	Bacilli	Lactobacillales	Streptococcaceae	Lactococcus	Lactococcus raffinolactis|1215915	Yes
	Firmicutes	Bacilli	Lactobacillales	Streptococcaceae	Streptococcus	Streptococcus agalactiae|1333578	Yes
	Firmicutes	Bacilli	Lactobacillales	Streptococcaceae	Streptococcus	Streptococcus anginosus|1163302	Yes
	Firmicutes	Bacilli	Lactobacillales	Streptococcaceae	Streptococcus	Streptococcus australis|888833	Yes
	Firmicutes	Bacilli	Lactobacillales	Streptococcaceae	Streptococcus	Streptococcus caballi|1123298	Yes
	Firmicutes	Bacilli	Lactobacillales	Streptococcaceae	Streptococcus	Streptococcus canis|482234	Yes
	Firmicutes	Bacilli	Lactobacillales	Streptococcaceae	Streptococcus	Streptococcus castoreus|1123299	Yes
	Firmicutes	Bacilli	Lactobacillales	Streptococcaceae	Streptococcus	Streptococcus constellatus|1095730	Yes
	Firmicutes	Bacilli	Lactobacillales	Streptococcaceae	Streptococcus	Streptococcus criceti|873449	Yes
	Firmicutes	Bacilli	Lactobacillales	Streptococcaceae	Streptococcus	Streptococcus cristatus|889201	Yes
	Firmicutes	Bacilli	Lactobacillales	Streptococcaceae	Streptococcus	Streptococcus devriesei|1123300	Yes
	Firmicutes	Bacilli	Lactobacillales	Streptococcaceae	Streptococcus	Streptococcus didelphis|1123301	Yes
	Firmicutes	Bacilli	Lactobacillales	Streptococcaceae	Streptococcus	Streptococcus downei|904293	Yes
	Firmicutes	Bacilli	Lactobacillales	Streptococcaceae	Streptococcus	Streptococcus dysgalactiae|1005706	Yes
	Firmicutes	Bacilli	Lactobacillales	Streptococcaceae	Streptococcus	Streptococcus entericus|1123302	Yes
	Firmicutes	Bacilli	Lactobacillales	Streptococcaceae	Streptococcus	Streptococcus equi|1352602	Yes
	Firmicutes	Bacilli	Lactobacillales	Streptococcaceae	Streptococcus	Streptococcus equinus|864569	Yes
	Firmicutes	Bacilli	Lactobacillales	Streptococcaceae	Streptococcus	Streptococcus ferus|1123303	Yes
	Firmicutes	Bacilli	Lactobacillales	Streptococcaceae	Streptococcus	Streptococcus gallolyticus|545774	Yes
	Firmicutes	Bacilli	Lactobacillales	Streptococcaceae	Streptococcus	Streptococcus gordonii|467705	Yes
	Firmicutes	Bacilli	Lactobacillales	Streptococcaceae	Streptococcus	Streptococcus henryi|1123304	Yes
	Firmicutes	Bacilli	Lactobacillales	Streptococcaceae	Streptococcus	Streptococcus hongkongensis|910939	Yes
	Firmicutes	Bacilli	Lactobacillales	Streptococcaceae	Streptococcus	Streptococcus hyovaginalis|1123305	Yes
	Firmicutes	Bacilli	Lactobacillales	Streptococcaceae	Streptococcus	Streptococcus ictaluri|764299	Yes
	Firmicutes	Bacilli	Lactobacillales	Streptococcaceae	Streptococcus	Streptococcus infantarius|471872	Yes
	Firmicutes	Bacilli	Lactobacillales	Streptococcaceae	Streptococcus	Streptococcus infantis|889204	Yes
	Firmicutes	Bacilli	Lactobacillales	Streptococcaceae	Streptococcus	Streptococcus iniae|1273539	Yes
	Firmicutes	Bacilli	Lactobacillales	Streptococcaceae	Streptococcus	Streptococcus intermedius|1316583	Yes
	Firmicutes	Bacilli	Lactobacillales	Streptococcaceae	Streptococcus	Streptococcus lutetiensis|1076934	Yes
	Firmicutes	Bacilli	Lactobacillales	Streptococcaceae	Streptococcus	Streptococcus macacae|764298	Yes
	Firmicutes	Bacilli	Lactobacillales	Streptococcaceae	Streptococcus	Streptococcus macedonicus|59310	Yes
	Firmicutes	Bacilli	Lactobacillales	Streptococcaceae	Streptococcus	Streptococcus marimammalium|1123306	Yes
	Firmicutes	Bacilli	Lactobacillales	Streptococcaceae	Streptococcus	Streptococcus massiliensis|1123307	Yes
	Firmicutes	Bacilli	Lactobacillales	Streptococcaceae	Streptococcus	Streptococcus merionis|1123308	Yes
	Firmicutes	Bacilli	Lactobacillales	Streptococcaceae	Streptococcus	Streptococcus minor|1123309	Yes
	Firmicutes	Bacilli	Lactobacillales	Streptococcaceae	Streptococcus	Streptococcus mitis|768726	Yes
	Firmicutes	Bacilli	Lactobacillales	Streptococcaceae	Streptococcus	Streptococcus mutans|1404260	Yes
	Firmicutes	Bacilli	Lactobacillales	Streptococcaceae	Streptococcus	Streptococcus oligofermentans|1302863	Yes
	Firmicutes	Bacilli	Lactobacillales	Streptococcaceae	Streptococcus	Streptococcus oralis|1303	Yes
	Firmicutes	Bacilli	Lactobacillales	Streptococcaceae	Streptococcus	Streptococcus orisratti|1123311	Yes
	Firmicutes	Bacilli	Lactobacillales	Streptococcaceae	Streptococcus	Streptococcus ovis|1123312	Yes
	Firmicutes	Bacilli	Lactobacillales	Streptococcaceae	Streptococcus	Streptococcus parasanguinis|905067	Yes
	Firmicutes	Bacilli	Lactobacillales	Streptococcaceae	Streptococcus	Streptococcus parauberis|873447	Yes
	Firmicutes	Bacilli	Lactobacillales	Streptococcaceae	Streptococcus	Streptococcus pasteurianus|981540	Yes
	Firmicutes	Bacilli	Lactobacillales	Streptococcaceae	Streptococcus	Streptococcus peroris|888746	Yes
	Firmicutes	Bacilli	Lactobacillales	Streptococcaceae	Streptococcus	Streptococcus phocae|1000562	Yes
	Firmicutes	Bacilli	Lactobacillales	Streptococcaceae	Streptococcus	Streptococcus plurextorum|1123314	Yes
	Firmicutes	Bacilli	Lactobacillales	Streptococcaceae	Streptococcus	Streptococcus pneumoniae|170187	Yes
	Firmicutes	Bacilli	Lactobacillales	Streptococcaceae	Streptococcus	Streptococcus porci|1123315	Yes
	Firmicutes	Bacilli	Lactobacillales	Streptococcaceae	Streptococcus	Streptococcus porcinus|873448	Yes
	Firmicutes	Bacilli	Lactobacillales	Streptococcaceae	Streptococcus	Streptococcus pseudopneumoniae|1415761	Yes
	Firmicutes	Bacilli	Lactobacillales	Streptococcaceae	Streptococcus	Streptococcus pseudoporcinus|875093	Yes
	Firmicutes	Bacilli	Lactobacillales	Streptococcaceae	Streptococcus	Streptococcus pyogenes|1439314	Yes
	Firmicutes	Bacilli	Lactobacillales	Streptococcaceae	Streptococcus	Streptococcus ratti|699248	Yes
	Firmicutes	Bacilli	Lactobacillales	Streptococcaceae	Streptococcus	Streptococcus salivarius|596322	Yes
	Firmicutes	Bacilli	Lactobacillales	Streptococcaceae	Streptococcus	Streptococcus sanguinis|997356	Yes
	Firmicutes	Bacilli	Lactobacillales	Streptococcaceae	Streptococcus	Streptococcus sinensis|176090	Yes
	Firmicutes	Bacilli	Lactobacillales	Streptococcaceae	Streptococcus	Streptococcus sobrinus|1123317	Yes
	Firmicutes	Bacilli	Lactobacillales	Streptococcaceae	Streptococcus	Streptococcus sp. GMD4S|1169673	Yes
	Firmicutes	Bacilli	Lactobacillales	Streptococcaceae	Streptococcus	Streptococcus suis|1321372	Yes
	Firmicutes	Bacilli	Lactobacillales	Streptococcaceae	Streptococcus	Streptococcus thermophilus|1073570	Yes
	Firmicutes	Bacilli	Lactobacillales	Streptococcaceae	Streptococcus	Streptococcus thoraltensis|1123318	Yes
	Firmicutes	Bacilli	Lactobacillales	Streptococcaceae	Streptococcus	Streptococcus tigurinus|1282665	Yes
	Firmicutes	Bacilli	Lactobacillales	Streptococcaceae	Streptococcus	Streptococcus uberis|218495	Yes
	Firmicutes	Bacilli	Lactobacillales	Streptococcaceae	Streptococcus	Streptococcus urinalis|764291	Yes
	Firmicutes	Bacilli	Lactobacillales	Streptococcaceae	Streptococcus	Streptococcus vestibularis|904306	Yes
	Firmicutes	Clostridia	Clostridiales	Caldicoprobacteraceae	Caldicoprobacter	Caldicoprobacter oshimai|1304880	Yes
	Firmicutes	Clostridia	Clostridiales	Clostridiaceae	Alkaliphilus	Alkaliphilus oremlandii|350688	Yes
	Firmicutes	Clostridia	Clostridiales	Clostridiaceae	Alkaliphilus	Alkaliphilus transvaalensis|1408422	Yes
	Firmicutes	Clostridia	Clostridiales	Clostridiaceae	Butyricicoccus	Butyricicoccus pullicaecorum|1203606	Yes
	Firmicutes	Clostridia	Clostridiales	Clostridiaceae	Caloramator	Caloramator australicus|857293	Yes
	Firmicutes	Clostridia	Clostridiales	Clostridiaceae	Caloramator	Caloramator sp. ALD01|1031288	Yes
	Firmicutes	Clostridia	Clostridiales	Clostridiaceae	Caloranaerobacter	Caloranaerobacter azorensis|1156417	Yes
	Firmicutes	Clostridia	Clostridiales	Clostridiaceae	Candidatus Arthromitus	Candidatus Arthromitus sp. SFB-mouse-NL|1508644	Yes
	Firmicutes	Clostridia	Clostridiales	Clostridiaceae	Clostridiisalibacter	Clostridiisalibacter paucivorans|1121289	Yes
	Firmicutes	Clostridia	Clostridiales	Clostridiaceae	Clostridium	[Clostridium] cellulolyticum|394503	Yes
	Firmicutes	Clostridia	Clostridiales	Clostridiaceae	Clostridium	Clostridium acetobutylicum|863638	Yes
	Firmicutes	Clostridia	Clostridiales	Clostridiaceae	Clostridium	Clostridium akagii|1121293	Yes
	Firmicutes	Clostridia	Clostridiales	Clostridiaceae	Clostridium	Clostridium algidicarnis|37659	Yes
	Firmicutes	Clostridia	Clostridiales	Clostridiaceae	Clostridium	Clostridium arbusti|545243	Yes
	Firmicutes	Clostridia	Clostridiales	Clostridiaceae	Clostridium	Clostridium autoethanogenum|1341692	Yes
	Firmicutes	Clostridia	Clostridiales	Clostridiaceae	Clostridium	Clostridium baratii|1415775	Yes
	Firmicutes	Clostridia	Clostridiales	Clostridiaceae	Clostridium	Clostridium beijerinckii|290402	Yes
	Firmicutes	Clostridia	Clostridiales	Clostridiaceae	Clostridium	Clostridium botulinum|536232	Yes
	Firmicutes	Clostridia	Clostridiales	Clostridiaceae	Clostridium	Clostridium butyricum|632245	Yes
	Firmicutes	Clostridia	Clostridiales	Clostridiaceae	Clostridium	Clostridium cadaveris|1280692	Yes
	Firmicutes	Clostridia	Clostridiales	Clostridiaceae	Clostridium	Clostridium carboxidivorans|536227	Yes
	Firmicutes	Clostridia	Clostridiales	Clostridiaceae	Clostridium	Clostridium celatum|545697	Yes
	Firmicutes	Clostridia	Clostridiales	Clostridiaceae	Clostridium	Clostridium cellulovorans|573061	Yes
	Firmicutes	Clostridia	Clostridiales	Clostridiaceae	Clostridium	Clostridium colicanis|999411	Yes
	Firmicutes	Clostridia	Clostridiales	Clostridiaceae	Clostridium	Clostridium drakei|332101	Yes
	Firmicutes	Clostridia	Clostridiales	Clostridiaceae	Clostridium	Clostridium haemolyticum|1443115	Yes
	Firmicutes	Clostridia	Clostridiales	Clostridiaceae	Clostridium	Clostridium hydrogeniformans|1121319	Yes
	Firmicutes	Clostridia	Clostridiales	Clostridiaceae	Clostridium	Clostridium intestinale|1294142	Yes
	Firmicutes	Clostridia	Clostridiales	Clostridiaceae	Clostridium	Clostridium kluyveri|431943	Yes
	Firmicutes	Clostridia	Clostridiales	Clostridiaceae	Clostridium	Clostridium ljungdahlii|748727	Yes
	Firmicutes	Clostridia	Clostridiales	Clostridiaceae	Clostridium	Clostridium lundense|1410653	Yes
	Firmicutes	Clostridia	Clostridiales	Clostridiaceae	Clostridium	Clostridium novyi|386415	Yes
	Firmicutes	Clostridia	Clostridiales	Clostridiaceae	Clostridium	Clostridium paraputrificum|1280689	Yes
	Firmicutes	Clostridia	Clostridiales	Clostridiaceae	Clostridium	Clostridium pasteurianum|86416	Yes
	Firmicutes	Clostridia	Clostridiales	Clostridiaceae	Clostridium	Clostridium perfringens|742739	Yes
	Firmicutes	Clostridia	Clostridiales	Clostridiaceae	Clostridium	Clostridium saccharobutylicum|1345695	Yes
	Firmicutes	Clostridia	Clostridiales	Clostridiaceae	Clostridium	Clostridium saccharoperbutylacetonicum|931276	Yes
	Firmicutes	Clostridia	Clostridiales	Clostridiaceae	Clostridium	Clostridium sartagoforme|1202534	Yes
	Firmicutes	Clostridia	Clostridiales	Clostridiaceae	Clostridium	Clostridium scatologenes|1548	Yes
	Firmicutes	Clostridia	Clostridiales	Clostridiaceae	Clostridium	Clostridium sp. ASF502|97139	Yes
	Firmicutes	Clostridia	Clostridiales	Clostridiaceae	Clostridium	Clostridium sporogenes|471871	Yes
	Firmicutes	Clostridia	Clostridiales	Clostridiaceae	Clostridium	Clostridium sulfidigenes|318464	Yes
	Firmicutes	Clostridia	Clostridiales	Clostridiaceae	Clostridium	Clostridium tetani|212717	Yes
	Firmicutes	Clostridia	Clostridiales	Clostridiaceae	Clostridium	Clostridium tetanomorphum|1230342	Yes
	Firmicutes	Clostridia	Clostridiales	Clostridiaceae	Clostridium	Clostridium tunisiense|1233099	Yes
	Firmicutes	Clostridia	Clostridiales	Clostridiaceae	Clostridium	Clostridium tyrobutyricum|1121342	Yes
	Firmicutes	Clostridia	Clostridiales	Clostridiaceae	Clostridium	Clostridium ultunense|1288971	Yes
	Firmicutes	Clostridia	Clostridiales	Clostridiaceae	Fervidicella	Fervidicella metallireducens|1403537	Yes
	Firmicutes	Clostridia	Clostridiales	Clostridiaceae	Proteiniclasticum	Proteiniclasticum ruminis|1410668	Yes
	Firmicutes	Clostridia	Clostridiales	Clostridiaceae	Thermobrachium	Thermobrachium celere|941824	Yes
	Firmicutes	Clostridia	Clostridiales	Clostridiaceae	Youngiibacter	Youngiibacter fragilis|994573	Yes
	Firmicutes	Clostridia	Clostridiales	Clostridiaceae		Clostridiaceae bacterium L21-TH-D2|1304284	Yes
	Firmicutes	Clostridia	Clostridiales	Clostridiales Family XI. Incertae Sedis	Anaerococcus	Anaerococcus hydrogenalis|879306	Yes
	Firmicutes	Clostridia	Clostridiales	Clostridiales Family XI. Incertae Sedis	Anaerococcus	Anaerococcus lactolyticus|525254	Yes
	Firmicutes	Clostridia	Clostridiales	Clostridiales Family XI. Incertae Sedis	Anaerococcus	Anaerococcus obesiensis|1118056	Yes
	Firmicutes	Clostridia	Clostridiales	Clostridiales Family XI. Incertae Sedis	Anaerococcus	Anaerococcus prevotii|879305	Yes
	Firmicutes	Clostridia	Clostridiales	Clostridiales Family XI. Incertae Sedis	Anaerococcus	Anaerococcus sp. PH9|1118055	Yes
	Firmicutes	Clostridia	Clostridiales	Clostridiales Family XI. Incertae Sedis	Anaerococcus	Anaerococcus tetradius|525255	Yes
	Firmicutes	Clostridia	Clostridiales	Clostridiales Family XI. Incertae Sedis	Anaerococcus	Anaerococcus vaginalis|655811	Yes
	Firmicutes	Clostridia	Clostridiales	Clostridiales Family XI. Incertae Sedis	Finegoldia	Finegoldia magna|525282	Yes
	Firmicutes	Clostridia	Clostridiales	Clostridiales Family XI. Incertae Sedis	Helcococcus	Helcococcus kunzii|883114	Yes
	Firmicutes	Clostridia	Clostridiales	Clostridiales Family XI. Incertae Sedis	Helcococcus	Helcococcus sueciensis|1121947	Yes
	Firmicutes	Clostridia	Clostridiales	Clostridiales Family XI. Incertae Sedis	Parvimonas	Parvimonas micra|1408286	Yes
	Firmicutes	Clostridia	Clostridiales	Clostridiales Family XI. Incertae Sedis	Parvimonas	Parvimonas sp. oral taxon 110|767100	Yes
	Firmicutes	Clostridia	Clostridiales	Clostridiales Family XI. Incertae Sedis	Peptoniphilus	Peptoniphilus duerdenii|862517	Yes
	Firmicutes	Clostridia	Clostridiales	Clostridiales Family XI. Incertae Sedis	Peptoniphilus	Peptoniphilus harei|908338	Yes
	Firmicutes	Clostridia	Clostridiales	Clostridiales Family XI. Incertae Sedis	Peptoniphilus	Peptoniphilus indolicus|997350	Yes
	Firmicutes	Clostridia	Clostridiales	Clostridiales Family XI. Incertae Sedis	Peptoniphilus	Peptoniphilus lacrimalis|1122949	Yes
	Firmicutes	Clostridia	Clostridiales	Clostridiales Family XI. Incertae Sedis	Peptoniphilus	Peptoniphilus rhinitidis|875454	Yes
	Firmicutes	Clostridia	Clostridiales	Clostridiales Family XI. Incertae Sedis	Peptoniphilus	Peptoniphilus senegalensis|1033744	Yes
	Firmicutes	Clostridia	Clostridiales	Clostridiales Family XI. Incertae Sedis	Peptoniphilus	Peptoniphilus sp. BV3C26|1111134	Yes
	Firmicutes	Clostridia	Clostridiales	Clostridiales Family XIII. Incertae Sedis	Anaerovorax	Anaerovorax odorimutans|1120998	Yes
	Firmicutes	Clostridia	Clostridiales	Clostridiales Family XIII. Incertae Sedis	Mogibacterium	Mogibacterium sp. CM50|936375	Yes
	Firmicutes	Clostridia	Clostridiales	Clostridiales Family XIII. Incertae Sedis	Mogibacterium	Mogibacterium timidum|1401079	Yes
	Firmicutes	Clostridia	Clostridiales	Clostridiales Family XIII. Incertae Sedis		[Eubacterium] infirmum|883109	Yes
	Firmicutes	Clostridia	Clostridiales	Clostridiales Family XIII. Incertae Sedis		[Eubacterium] nodatum|1161902	Yes
	Firmicutes	Clostridia	Clostridiales	Clostridiales Family XIII. Incertae Sedis		[Eubacterium] sulci|888727	Yes
	Firmicutes	Clostridia	Clostridiales	Clostridiales Family XVII. Incertae Sedis	Sulfobacillus	Sulfobacillus acidophilus|679936	Yes
	Firmicutes	Clostridia	Clostridiales	Clostridiales Family XVII. Incertae Sedis	Sulfobacillus	Sulfobacillus thermosulfidooxidans|1366420	Yes
	Firmicutes	Clostridia	Clostridiales	Clostridiales Family XVII. Incertae Sedis	Thermaerobacter	Thermaerobacter marianensis|644966	Yes
	Firmicutes	Clostridia	Clostridiales	Clostridiales Family XVII. Incertae Sedis	Thermaerobacter	Thermaerobacter subterraneus|867903	Yes
	Firmicutes	Clostridia	Clostridiales	Clostridiales Family XVIII. Incertae Sedis	Symbiobacterium	Symbiobacterium thermophilum|292459	Yes
	Firmicutes	Clostridia	Clostridiales	Eubacteriaceae	Acetobacterium	Acetobacterium dehalogenans|1068975	Yes
	Firmicutes	Clostridia	Clostridiales	Eubacteriaceae	Acetobacterium	Acetobacterium woodii|931626	Yes
	Firmicutes	Clostridia	Clostridiales	Eubacteriaceae	Anaerofustis	Anaerofustis stercorihominis|445971	Yes
	Firmicutes	Clostridia	Clostridiales	Eubacteriaceae	Eubacterium	[Eubacterium] cellulosolvens|633697	Yes
	Firmicutes	Clostridia	Clostridiales	Eubacteriaceae	Eubacterium	[Eubacterium] eligens|515620	Yes
	Firmicutes	Clostridia	Clostridiales	Eubacteriaceae	Eubacterium	[Eubacterium] hallii|411469	Yes
	Firmicutes	Clostridia	Clostridiales	Eubacteriaceae	Eubacterium	Eubacterium acidaminophilum|1286171	Yes
	Firmicutes	Clostridia	Clostridiales	Eubacteriaceae	Eubacterium	Eubacterium brachy|1321814	Yes
	Firmicutes	Clostridia	Clostridiales	Eubacteriaceae	Eubacterium	Eubacterium desmolans|1408437	Yes
	Firmicutes	Clostridia	Clostridiales	Eubacteriaceae	Eubacterium	Eubacterium limosum|903814	Yes
	Firmicutes	Clostridia	Clostridiales	Eubacteriaceae	Eubacterium	Eubacterium plexicaudatum|1235802	Yes
	Firmicutes	Clostridia	Clostridiales	Eubacteriaceae	Eubacterium	Eubacterium ramulus|1256908	Yes
	Firmicutes	Clostridia	Clostridiales	Eubacteriaceae	Eubacterium	Eubacterium rectale|515619	Yes
	Firmicutes	Clostridia	Clostridiales	Eubacteriaceae	Eubacterium	Eubacterium sp. 14-2|1235790	Yes
	Firmicutes	Clostridia	Clostridiales	Eubacteriaceae	Eubacterium	Eubacterium ventriosum|411463	Yes
	Firmicutes	Clostridia	Clostridiales	Eubacteriaceae	Eubacterium	Eubacterium xylanophilum|1336241	Yes
	Firmicutes	Clostridia	Clostridiales	Eubacteriaceae	Pseudoramibacter	Pseudoramibacter alactolyticus|887929	Yes
	Firmicutes	Clostridia	Clostridiales	Lachnospiraceae	Anaerostipes	Anaerostipes caccae|411490	Yes
	Firmicutes	Clostridia	Clostridiales	Lachnospiraceae	Anaerostipes	Anaerostipes hadrus|649757	Yes
	Firmicutes	Clostridia	Clostridiales	Lachnospiraceae	Anaerostipes	Anaerostipes sp. 3_2_56FAA|665937	Yes
	Firmicutes	Clostridia	Clostridiales	Lachnospiraceae	Blautia	[Ruminococcus] gnavus|1384063	Yes
	Firmicutes	Clostridia	Clostridiales	Lachnospiraceae	Blautia	[Ruminococcus] obeum|411459	Yes
	Firmicutes	Clostridia	Clostridiales	Lachnospiraceae	Blautia	[Ruminococcus] torques|411460	Yes
	Firmicutes	Clostridia	Clostridiales	Lachnospiraceae	Blautia	Blautia hansenii|537007	Yes
	Firmicutes	Clostridia	Clostridiales	Lachnospiraceae	Blautia	Blautia hydrogenotrophica|476272	Yes
	Firmicutes	Clostridia	Clostridiales	Lachnospiraceae	Blautia	Blautia producta|33035	Yes
	Firmicutes	Clostridia	Clostridiales	Lachnospiraceae	Blautia	Blautia sp. KLE 1732|1226324	Yes
	Firmicutes	Clostridia	Clostridiales	Lachnospiraceae	Blautia	Blautia wexlerae|1280691	Yes
	Firmicutes	Clostridia	Clostridiales	Lachnospiraceae	Butyrivibrio	Butyrivibrio crossotus|511680	Yes
[truncated: 2,081 more rows]
