# Supplementary material for: Transcription termination and antitermination of bacterial CRISPR arrays
Source: eLife journal article supplement (doi:10.7554/elife.58182), 2020-10-30
Supplement: supp [file elife-58182-supp-v1.zip › elife_poa_e58182_Supplementary_file_4.xlsx]

## Sheet: Sheet1
	Supplementary file 4. Sequences used for phylogenetic analysis of CRISPR array upstream regions
	CRISPR-Cas type	Cas2 PFAM ID	GenBank Genome ID	Taxonomic Name	Assembly Filename	cas2 Start Coordinate	cas2 Stop Coordinate	cas2 Downstream Sequence	MEME-identified boxA?	boxA Sequence	Phylum	Class
	IE	A0A0T9Y5G2_SALET	HF969015.2	Salmonella enterica subsp. enterica serovar Bovismorbificans str. 3114 complete genome	GCA_000499465.2_SB3114_genomic.fna	2960703	2960413	ATAAGTTATAGATCTTTAAAAATTAGGAAAAGTTGGTGGGTTTTTTGTGCGCTAAAAAAGTATTTAAATTCAATTGGGT	Y	AGATCTTTAAAAATTAGGAA	Proteobacteria	Gammaproteobacteria
	IF, IE	A1SV76_PSYIN	CP000510.1	Psychromonas ingrahamii 37, complete genome	GCA_000015285.1_ASM1528v1_genomic.fna	1948113	1948406	CTGAACAAAATTTGCTCTTTAAAAATCGGTAATTATTGAAGTACTCTATTTATCCTTACAAAACAATGATATATAC	Y	TGCTCTTTAAAAATCGGTAA	Proteobacteria	Gammaproteobacteria
	IE	A7MFM2_CROS8	CP000783.1	Cronobacter sakazakii ATCC BAA-894, complete genome	GCA_000017665.1_ASM1766v1_genomic.fna	2780110	2779820	GTAGGTTATTCGCTCTTTAACAATGCGAGATTGTGAACCAAACGTTGGTAGGATGTTGTTGCACGAAAAAGTGTAATAGATACAAGTATATAGTTTTA	Y	CGCTCTTTAACAATGCGAGA	Proteobacteria	Gammaproteobacteria
	ID	B0JKX0_MICAN	AP009552.1	Microcystis aeruginosa NIES-843 DNA, complete genome	GCA_000010625.1_ASM1062v1_genomic.fna	2814263	2814532	TTAGCTCGGTTGCGCTTCCGGGTAGCTGTAAAAATCCTTAACTATTATCTGGTGGCTGAAAAGCTTATGCAATATAGATTCGAGATGATTTTCCTTTCCAACGCGGGGCGCACCTTATCCCGTAAGGTTTTGCGGGGTCTTGAAGAACTGGGTCACTTGCTGTATGATTGGTTTATTGCGGGTGCGGCGCATACGAACCTTGAAAATCCCATAACGTATAGCTTTTACCACTGGG	Y	CGAACCTTGAAAATCCCATA	Cyanobacteria	Cyanophyceae
	IIIB, IU	B8GLF5_THISH	CP001339.1	Thioalkalivibrio sulfidiphilus HL-EbGr7 chromosome, complete genome	GCA_000021985.1_ASM2198v1_genomic.fna	2578755	2578468	TTAAACTTTCGGGCACGGCACGTGTTAATCGACATGCCGCCGGAGTGATTCGAGCGCTGGGTTGATGCCGGCAAGCCCGGGCAGCGCTCGAAAGACTCCAGCTCTTTGAAAATATGGGATAAATTGGTTTATTGTCGGACTTAGTGGAGTGCCGGATATGCGTGAATTCGTGTTTGAATTGAAGGTGCTCGAAAACCCGCCCTCCAGGCCTTGTGTCATCGACTTTTCTGCGAGGG	Y	AGCTCTTTGAAAATATGGGA	Proteobacteria	Gammaproteobacteria
	VB, IC, IE	B8IMQ9_METNO	CP001349.1	Methylobacterium nodulans ORS 2060, complete genome	GCA_000022085.1_ASM2208v1_genomic.fna	5494646	5494371	CTGAGGCTCAGCGTTCATCCGCCGGAACGCCTGCCGAACGTCGGTGCGCTCTTTGACATCGTGAAACACGAGTTCTTCAAAGGCTTTATCGGAA	Y	CGCTCTTTGACATCGTGAAA	Proteobacteria	Alphaproteobacteria
	?	C9R402_AGGAD	CP003099.1	Aggregatibacter actinomycetemcomitans ANH9381, complete genome	GCA_000241025.2_ASM24102v2_genomic.fna	1378521	1378811	CTAGCTCGCTAACTCCTAGTTCTCATCAAATTCCCGTCAGGCTAGCGATCCTGATTTTCTTTAACAATTTGGAACAGTTAATTCATTTGTATAACGACGACATGCCCGTTATACTTATCCCACTCTCTATTTTGAAATAAGTTAGCGAAATACAGGAAGTAATCTACTGATTTTTCTTGTTTTTTCATATAGGGA	Y	TTTTCTTTAACAATTTGGAA	Proteobacteria	Gammaproteobacteria
	IE	CAS2_ECOLI	HG738867.1	Escherichia coli str. K-12 substr. MC4100 complete genome	GCA_000499485.1_MYMC4100_genomic.fna	3904928	3905209	TTGAAAACAAAGAATTAGCTGATCTTTAATAATAAGGAAATGTTACATTAAGGTTGGTGGGTTGTTTTTATGGGAAAAAATGCTTTAAGAACAAATGTATACTTTTA	Y	TGATCTTTAATAATAAGGAA	Proteobacteria	Gammaproteobacteria
	IC, IA, IIIB	CAS2_MYXXD	CP000113.1	Myxococcus xanthus DK 1622, complete genome	GCA_000012685.1_ASM1268v1_genomic.fna	8862970	8862680	GTGAGACGGACGACAATCAAGCACCTCGCCGTGGCGGAGGCTCGCGATGGCGAAAGTGGCGGATTCCCTGTCGTTTCATGGGGGTGAGGCTCTTTGACAGGTGAATAGGTGCATGATCGATGAAAAGCCGAGTGGTTTCATGGGGTTGGCGATTCTGGGTAGGGCCTGGGATGGCCAACCTGGGGGAAGGAGGGGGAGGTGCTTGAAAGGGGTTTGTAAGGTGCCGGAATTGCTGGGGGATTCAGGCGGGCTGTCT	Y	GGCTCTTTGACAGGTGAATA	Proteobacteria	Deltaproteobacteria
	IIIB, ?, IIID	D0LSX0_HALO1	CP001804.1	Haliangium ochraceum DSM 14365, complete genome	GCA_000024805.1_ASM2480v1_genomic.fna	6642136	6642429	ATGAAGACGTAGATTCGAGCGCTCTTTGACAATTGCAGAGAAGGAACGAAGGAACGAAGGAACGATGACGCGGAGCACAAGACCGCGAGCGCTTCAGTGGCGCGCAACATCCGGGCACCGCTCGCAGCGTTTAACTCCTTGGATTTATTGGAGCCTTGGCCAGCGATACGGAATTCGCTCGCCCGCTCCGTACACATCGCCTGCACCACTCGCAAAGCCATCCGTTTTCTGCCATGATACCGACAGCTTGCCCCCCGGGC	Y	CGCTCTTTGACAATTGCAGA	Proteobacteria	Deltaproteobacteria
	IE	D2TKL0_CITRI	FN543502.1	Citrobacter rodentium ICC168, complete genome	GCA_000027085.1_ASM2708v1_genomic.fna	3224601	3224873	TTAAAATCAAATAGTTGACTGATCTTTAAAAATGTGGATTTGTTGATTTTAAGTTGGTAGATTGTTGCCTTTGAAGAAAGTCTTTTAAAATCAGTCGGATATTTTTA	Y	TGATCTTTAAAAATGTGGAT	Proteobacteria	Gammaproteobacteria
	IB	D3DIP6_HYDTT	CP002221.1	Hydrogenobacter thermophilus TK-6, complete genome	GCA_000164905.1_ASM16490v1_genomic.fna	1125205	1124942	CTAAGCCTTCCAATACTTTGTCTATCCCCCGGAATTTTTGCAAGATTGGAGGTGGACAGAAAAATAACCCCACTTGACTAACTTGCCACTAGGGTTTATAATACACATGCAAGCTTACTACACCAAAAGCTTTTTGACAACTGAATATGGGTTTGTTCCTAAC	Y	AGCTTTTTGACAACTGAATA	Aquificae	Aquificales
	IE	D3RPL3_ALLVD	CP001896.1	Allochromatium vinosum DSM 180, complete genome	GCA_000025485.1_ASM2548v1_genomic.fna	762752	762465	CTGAGTTCTTTGACAATCAAAATCGTGCCCCTTTGAAAAGAGGCATTTTGTTGGTAGATTTCTCAGCGTCTGATTTCTTTTTCTAGATCAGGCAAGTATGGGAA	Y	AGTTCTTTGACAATCAAAAT	Proteobacteria	Gammaproteobacteria
	IC	D5ASG7_RHOCB	CP001312.1	Rhodobacter capsulatus SB 1003, complete genome	GCA_000021865.1_ASM2186v1_genomic.fna	1394898	1395185	CTGATCTGCGAACCCCAAGGGTGTGGCCGTTTCCCACCCGGTTCGCACCGCGTCAGCTCTTTGAAATTGTGGATGAAGCACCGGAGCACCTTGCGCTGCCGCTCCGGAGGCGCTTGCGACAAGCACCTTCGCACCACCGGAGCAATTTACACCGTCTGGTCAGCGGGTTACGAAACG	Y	AGCTCTTTGAAATTGTGGAT	Proteobacteria	Alphaproteobacteria
	IB	D5V727_ARCNC	CP001999.1	Arcobacter nitrofigilis DSM 7299, complete genome	GCA_000092245.1_ASM9224v1_genomic.fna	2825449	2825760	ATAATTTTTCCAAGCTACTTAAAAACAATATCATCTAAAAACAGCTATAATAAGGCACTTTTAAAAAGTTCTTTCACAACTTATTGTTTTAAAATAATCGTTTGGAAAACTTCTTTAAAGAACCAATTAAAGGGAAAGTATGTTTTAGAAATGCCTAAATCATCT	Y	AGTTCTTTCACAACTTATTG	Proteobacteria	Epsilonproteobacteria
	IE, IIC	E1VHQ7_9GAMM	FP929140.1	gamma proteobacterium HdN1 complete genome	GCA_000198515.1_ASM19851v1_genomic.fna	940043	940330	ATGAGTTCTTTAAACGCTTGGTTGCCCTTCTTTAACGTCTGCTATACTTGGTAGGCTTTTGCTTGTGTGATTTCTTTCGGTAGATCAATGATGTGCAGT	Y	AGTTCTTTAAACGCTTGGTT	Proteobacteria	Gammaproteobacteria
	IIIB, IF	F2K1V8_MARM1	CP002583.1	Marinomonas mediterranea MMB-1, complete genome	GCA_000192865.1_ASM19286v1_genomic.fna	698600	698325	ATGATATAAACCCTTTATCAGTGAATAAACGGTTTTTGCTCTTTAAAAACAAAAACTTAAAACAGTCCTCTATCGATTGAAGGGGTATGAGGGCGCGTTTTTCATAAAAATCAAAAACTTAGCTTGAAATAATAGCGAAAATTCGCTAATTTTAAGTCTACCTCTTGTGGATAACTTGAGGGCGGGGGAAACGCTAGGTTAACCTGCTGAAATGATTGGAAAAAATAAGGGTA	Y	TGCTCTTTAAAAACAAAAAC	Proteobacteria	Gammaproteobacteria
	IIIA, IC, IE, IIIB, IB	F2NN57_MARHT	CP002630.1	Marinithermus hydrothermalis DSM 14884, complete genome	GCA_000195335.1_ASM19533v1_genomic.fna	2083114	2083374	TTGACTAAGTACAATATTCCTCGACCTCCGGTCGTGCTATAATCCCAGTAGGTTGATGCAAGCAACGCGCTATCAACACTTCCCTTCCTTATCGCGCATCCTTTCCCAGATTGTGTGCTGGGTTGGTCTTTGACAACTAAGGCACCAATCCGTAAGAGCCCTTCCTTAGGGGATGTTA	Y	TGGTCTTTGACAACTAAGGC	Deinococcus-Thermus	Deinococci
	IB, IIIB, IIIB	F4KZ95_HALH1	CP002691.1	Haliscomenobacter hydrossis DSM 1100, complete genome	GCA_000212735.1_ASM21273v1_genomic.fna	611205	611465	ATAATGCTAAAAATCAACAATTTAAACTTTCGCCCTCTGCCCTGAGCTCCAAAAGTCGTCGATCCCCCTGCAAAATCCGCTTATTGAACATCGACGATTTTTATGGGCTAAAAACGCTCTTTGACAAGTTGGTATTTATTTGGTTTTTAAGGAATAATGTATATTTTTGTGA	Y	CGCTCTTTGACAAGTTGGTA	Bacteroidetes	Sphingobacteria
	IIID	F8C1Y3_THEGP	CP002829.1	Thermodesulfobacterium geofontis OPF15, complete genome	GCA_000215975.1_ASM21597v1_genomic.fna	1221157	1221435	ATAGATCTTTGAAAAGTGAATATTGGCGGGTAACTTTACAAATAGGGTTTTTGAACTTATTTAAAAGGTTGAGCTTTGACGCAAAATTTTGATAGGTTCATTTAGAAAATGCTTGATATTTCTTATAATCAAATGC	Y	AGATCTTTGAAAAGTGAATA	Thermodesulfobacteria	Thermodesulfobacteria
	IB	F9ZC88_ODOSD	CP002544.1	Odoribacter splanchnicus DSM 20712, complete genome	GCA_000190535.1_ASM19053v1_genomic.fna	1529189	1528932	ATAGCGTCGACCTTAAAAAAATGATTGGGGGTTGAGAGAGTAATTACAATAGAAATGGAATAATAGTTCTTTGACATGTTGAAAATGAATAATTTAAAAGTTGTTGTCGAAGGTCAGGGTAAATTTAAGAATTGAAGGTCGACTGCAAATGTTTGTAAAAAATGAGAATAAATGGATGATAAATCATTGATTTTGAAGTATATTTGTTGGCGTTTTTAA	Y	AGTTCTTTGACATGTTGAAA	Bacteroidetes	Bacteroidia
	IE	G2IXX1_PSEUL	AP012224.1	Pseudogulbenkiania sp. NH8B DNA, complete genome	GCA_000283535.1_ASM28353v1_genomic.fna	704183	704476	TTGAATCTCCCTTCTTTAACAATCTGAAATTCGGCTTGAAAACCGGAGGAAAAAGCGGTAGATTTTTGCCTCCCCGAATAAGCCTTATGGTTCAAAGGTTTATTTTT	Y	CCTTCTTTAACAATCTGAAA	Proteobacteria	Betaproteobacteria
	IC, IIIA	G8UKD1_TANFA	CP003191.1	Tannerella forsythia 92A2, complete genome	GCA_000238215.1_ASM23821v1_genomic.fna	2507864	2508124	ATAAAAATTGTCTTTCTCCTTTTTTCGTCTCGAAAAAAGGAGAAAATCGCTGACAAAAGTTCTTTGACATATTGAAAATCAAAAGATAAAATTAGTTGTCGAAGTGCGGGGTTTTTCTTACCTTTGTGCTTCGACAACTTTGTTTGTTAATTTGTTGATATAATTGAAGGATAGATTATTGAGAATCAGTAATGTTTTTTGTCGTTTCGAAC	Y	AGTTCTTTGACATATTGAAA	Bacteroidetes	Bacteroidetes
	IU	H6N100_GORPV	CP003119.1	Gordonia polyisoprenivorans VH2, complete genome	GCA_000247715.1_ASM24771v1_genomic.fna	3984415	3984131	GTGATCCTGGACGCGAGCGGTCAGTCCGCCACACAAACCCTGGGCAGCGCTCGCGCGCTGGTCAAAGCGCTCTTTGAGAACTTTAGATGCGAAGGTAAAGTGTTCCGAGCACTCCGTCTATCGCACCCCTCGCGGGAGGCCTCGTTTCTGCAGGTCAGGAATGGTGAATTTCGCGAG	Y	CGCTCTTTGAGAACTTTAGA	Actinobacteria	Actinobacteria
	IC	I0IC59_PHYMF	AP012338.1	Phycisphaera mikurensis NBRC 102666 DNA, complete genome	GCA_000284115.1_ASM28411v1_genomic.fna	773263	772976	CTGATTCCGAGGCCCGCCCCCTCCCTCCGCGAACCCGCAGCGCGCACCCGCACCCGGGTGGGTTCGCGAAGCCCCCTGAGCCGCTCTCTGACAGCCAAAGAGTCCCCTCGCCCCCGCCGCCGGCTCGACTCCGGCCGCGCGGGCACCGAGGTTCGCGGAAACGCGTCCTCAAACTCCGCCTGAGCCACCGCTTAGGATGG	Y	CGCTCTCTGACAGCCAAAGA	Planctomycetes	Planctomycetia
	IE	I2BC78_SHIBC	CP001560.1	Shimwellia blattae DSM 4481 = NBRC 105725, complete genome	GCA_000262305.1_ASM26230v1_genomic.fna	3140158	3139868	GTAAGTTAACGTTCTTTAATAATCTGGAGAATTTGGTAGAATCAGAAACGTTAAAAAAATGCAGTAAATTCAGTTGTCTATATTTAG	Y	CGTTCTTTAATAATCTGGAG	Proteobacteria	Gammaproteobacteria
	IIIB	I4AEY8_FLELS	CP003345.1	Bernardetia litoralis DSM 6794 chromosome, complete genome	GCA_000265505.1_ASM26550v1_genomic.fna	13244	12951	CTAAAATGGCAGAAAAAAAGCTAAAACCTCGTTTTTAGAAATTTTGAGGCAAAAAAAAAGGCTCTAAAATTTTGAAAATTGAGTTTTAGAATGTACCTTTGGGAAAGGTTGAAAGCAAAAAAGTGCTTTTAGAGAAAAATAAAGACTGTTTTTTGATAAAAAGTAATGATTTTGACAAAATGTCAGTGTTG	Y	TGTTTTTTGATAAAAAGTAA	Bacteroidetes	Cytophagia
	?, IB	K0NDX9_DESTT	FO203503.1	Desulfobacula toluolica Tol2 complete genome	GCA_000307105.1_ASM30710v1_genomic.fna	1120549	1120827	ATGAGTGCTTGTTCTTTGACAATTTATAAAAATCCGTCGATCTTCCTATGATTTTACGCTATTGGGGGTTGACGGAAAAAACAGTTTGATTTATTAATACAACCTGTTAATTTTATATTGTTTTTTTGAT	Y	TGTTCTTTGACAATTTATAA	Proteobacteria	Deltaproteobacteria
	ID, IIID, ?, ID	K9PE62_9CYAN	CP003943.1	Calothrix sp. PCC 7507, complete genome	GCA_000316575.1_ASM31657v1_genomic.fna	1331764	1331474	ATGATGTTGATATAATGCTGGTAAAATTTTTTGGCAGGGCAAAGCACGGGCGAAAACCCCCCACCTCCCGCCAAATCGACAGAACCTTGACAATTCAATAGTTTCAGCCTTTTATGTATGAATGTAGAGCCTACTAATGAATCCCGGAAACGGACTTTTAAATTAGACCTGCCAAAATTGCTGGCGGGAATGGCTCTATATTTAGCTTCTGGCTGGCG	Y	AGAACCTTGACAATTCAATA	Cyanobacteria	Cyanophyceae
	ID, IA, IIID, IIIB	K9R5S1_9CYAN	CP003549.1	Rivularia sp. PCC 7116, complete genome	GCA_000316665.1_ASM31666v1_genomic.fna	286460	286729	TTAATTCACGGATGGGTAACTGTTGAAAAACAGGTTTTGAAAAAAATGGCTGAATCCCATATGTAGCAAGCTTTTGAGACTAAAAAGTGTCGAGGACCATCCGCGAAGCTTACCCAGACTGGGTTTCAGCCATTCCGACCCTTCTCATTTCAACTTTCACGTGCTATGATTAACCCATCCGTGAAACCGAACCTTGAAAACCTCATATTGAAAGGCTTTCAGATGCCCA	Y	CGAACCTTGAAAACCTCATA	Cyanobacteria	Cyanophyceae
	?	K9U225_9CYAN	CP003597.1	Chroococcidiopsis thermalis PCC 7203, complete genome	GCA_000317125.1_ASM31712v1_genomic.fna	3361448	3361164	GTAGGTGTTGGTACAGAGAGTTTGAAAAAAATGCTGGCGATCGGCGCGATACAGTAGTTTACAGGAATAATAGCTGATGACCCACCGCGCTCCTTGCTACGTCTAGGTTTTCACAATTTGTACCTTGCATGAACCAGCTTTTGTGATGCTATTATTGCTTTATCCGCGCTCTCGAACCTTGAAAACTAAATATGGCTTAGTTTTCAGGCTCCCG	Y	CGAACCTTGAAAACTAAATA	Cyanobacteria	Cyanophyceae
	IIID, ID	K9VXA5_9CYAN	CP003620.1	Crinalium epipsammum PCC 9333, complete genome	GCA_000317495.1_ASM31749v1_genomic.fna	992099	992365	TTAATGCGCGAAATGGTAGGTGTTGGGGTTGGGTATTGCTAAAAAAGTAGCTCAAAGCTTTATATAGTAAGGGTTGAACCTGAATGAGACTGTTGATCCGATTCGCGCAATCTCCCAACCTCTGACTCAGACTGATGTTTCTGCTATATATATAGATGTGGTTATGCGATCGCTAAAGCCTAAGATGTTATAATGACTGAAGGTTAGCGAATTTGTACCTTGAAAACTTCATACAATCATCGTTTTGGGCGACCGC	Y	TGTACCTTGAAAACTTCATA	Cyanobacteria	Cyanophyceae
	IIID, ?, ID, ?, IIID	K9WHW7_9CYAN	CP003630.1	Microcoleus sp. PCC 7113, complete genome	GCA_000317515.1_ASM31751v1_genomic.fna	3861088	3860819	TTGATGGTGACGGTCGGTAGGTGTTTTCTGAGGGTAATCTATTTTTGGGGCTGCATTCCTTATTCCACAAGGGTTTGCAGCCTTTGCTGTTTCAATGAGTGTGTCACCGCTCCTGAAACCTTTGATATGACTAGATTTCAGCGGATTTTTTATTTTCCTCTTATCATCCTTTGGCTCTGGTATGCTACTATAAGAGGTGTCCGTCACCAACGTACCTTGAAAACTAAATATAGTAAGGGTTCTGGATGCCTG	Y	CGTACCTTGAAAACTAAATA	Cyanobacteria	Cyanophyceae
	IIID, ID, IIIB, IU	K9Y9W7_HALP7	CP003945.1	Halothece sp. PCC 7418, complete genome	GCA_000317635.1_ASM31763v1_genomic.fna	768718	768987	TTAGAGAATTGCGCGACGGGGGTGCTGTGTAATGTGAACTGATTCCGCATTAGCGCGATCGCGCTTTCACTCTGGCTTTCAGCCTCGACTCGCCCCTAACCTATCGCGCACCTGTCACAGTAACGGTTTTAGCGATTTGGGGTTGTTTTTTCTGATCGCATTTGCTATGATTATTTCAGATTCGCGCAACTGGACTTTGAAAACTAAATATGACAACGGTTCTCAAGGCCTGC	Y	TGGACTTTGAAAACTAAATA	Cyanobacteria	Cyanophyceae
	?, ID, IIID, IIID, ?, IIIB, IIIB, IIIC	K9ZCV1_ANACC	CP003659.1	Anabaena cylindrica PCC 7122, complete genome	GCA_000317695.1_ASM31769v1_genomic.fna	1763982	1763713	TTAATGCGCGAGGGGGTGGGTGTAAAAAATCTGGGTTCTCAAAAAATGCCTAAATTCACATCTATACAAGGCTTTGATGGATTTTTTTGATTCGCCCGCCCGCGCACCTTACACAGCAAGGGTTTCAGCCATTTTGACTCTTGACACATTTTCTGAAATGGACTATGATGAGAGCGATCGCGCAACCGCACCTTGAAAACTATATATATAAAGGCTTTCAGCCTCCCGC	Y	CGCACCTTGAAAACTATATA	Cyanobacteria	Cyanophyceae
	IA, IU, ?	L0D829_SINAD	CP003364.1	Singulisphaera acidiphila DSM 18658, complete genome	GCA_000242455.3_ASM24245v3_genomic.fna	488232	487936	CTAACTCCCTGATTCAAGCATCTCCGGCCGTCGTGCCGAGTTCTCACCGCCGATGGACCGATCTCGTTCCCCTTCTTCAACATAGGGCTCTTTGGCAATACGAACGATCCATGATTCACCCGAACCCCGCACCGCCTATCAACTTGCAAACCGTTCTCCCCAGAGTCGGATCCCGTTTTCAAAGCCACCCCCAACTCTCCAAGCCCGTGCTTGAAAACGTGCTCCGCATCCTCTATCATACGAACAGTTTACAAGCGA	Y	GGCTCTTTGGCAATACGAAC	Planctomycetes	Planctomycetia
	IIIB, IU	L0GW69_9GAMM	CP003051.1	Thioflavicoccus mobilis 8321, complete genome	GCA_000327045.1_ASM32704v1_genomic.fna	1387631	1387341	CTGATCACGACTCTGTCGGGTACCAATTCCGCCCCTACCAGCCGATAATCGACCCGACGGACCACGACATCCCGGTCATCTCATCGTCGACAACATCCGCCGACCCACCGCGAGCGCTCCTTTGCCGCCAGAACTCCCGGGCAGCGCTCGATAAAAATAGATCTTTAAAAATCTAGAAATTACAATAAAATCTGAACGTGACACTTGATAAATTGACATCTCTCGTGTTCGTCTCCACCTACAGCCCTCGAAAAAACGCCCGCAGTCCACGCCACTTCTGGGCTGACAGGCGGG	Y	AGATCTTTAAAAATCTAGAA	Proteobacteria	Gammaproteobacteria
	IC	M5E586_9GAMM	HF680312.1	Thalassolituus oleivorans MIL-1 complete genome	GCA_000355675.1_ASM35567v1_genomic.fna	2351761	2351471	GTGAATCAAAAATCTCTCCGCTTACCTGTGGTTCTCAGTAAAACCCCATAGGTTTAGCGATATCGTAACTATCTGATTTTAAATAACTTATTTAGAATTAATTGATTCTTTAGGTTTACCGTCAAGTAAATTAGCAAGGTTAGCGGAAAGTAAACTCTTTTCGTATGTTCTTTAACAACTTAGACTTGAAC	Y	TGTTCTTTAACAACTTAGAC	Proteobacteria	Gammaproteobacteria
	IC	M9X1Y6_MANHA	CP006619.1	Mannheimia haemolytica USMARC_2286, complete genome	GCA_000439735.1_ASM43973v1_genomic.fna	1067895	1068185	ATAAATCGCTAGCCTGTAGTTCTCATAAAAATGTAGCAAGGTTAGCGAATCTATATTGTTCTTTAATAATCAAGGAATTAGAAAAAATAAGGCACAATATATTGGCGATATGCTATACTTTATCCACTCTCTACAAAACGTTAGCGAATAAAGGGCTAAAAAGCCTGATATTTCAATACGTTATCTTATAGGG	Y	TGTTCTTTAATAATCAAGGA	Proteobacteria	Gammaproteobacteria
	IE	Q0AA35_ALKEH	CP000453.1	Alkalilimnicola ehrlichii MLHE-1, complete genome	GCA_000014785.1_ASM1478v1_genomic.fna	1079946	1079653	TTAACACTCGGTCTTTAACAATTCAGTAAATTCAGCCTATTATCGTCTA	Y	CGGTCTTTAACAATTCAGTA	Proteobacteria	Gammaproteobacteria
	N.D.	Q0BRF5_GRABC	CP003183.1	Granulibacter bethesdensis CGDNIH2, complete genome	GCA_000576185.1_ASM57618v1_genomic.fna	1506905	1506612	TTAATTTTAGAAACATATCGTTCTTTAATATTGTCAATAAGTATCAATGTGTTATAGGTAA	Y	CGTTCTTTAATATTGTCAAT	Proteobacteria	Alphaproteobacteria
	IE	Q1R111_CHRSD	CP000285.1	Chromohalobacter salexigens DSM 3043, complete genome	GCA_000055785.1_ASM5578v1_genomic.fna	264261	264554	TTGACTGATTTTAAAGGCTCTTTAATAATTTGGGGCGATTAAATTTTAAGCAAAATCGCTGGTGGAAATTTCCCTGGCGATTTTGTTCTTTATAAACAAGTGTCTATGATTA	Y	GGCTCTTTAATAATTTGGGG	Proteobacteria	Gammaproteobacteria
	IC	Q2SIC7_HAHCH	CP000155.1	Hahella chejuensis KCTC 2396, complete genome	GCA_000012985.1_ASM1298v1_genomic.fna	2917032	2917322	CTAGCGCTAACCCCAGGCTCCCATAAAATCCCTGGGAGGTTAGCGCAGTTATAGGTATATGAAAAATAAACAGTTTAATCCCCAGAGTTAAAACCAACGCTCTTTAACAACCAGGAAACGCACAGGTTAGCGCAAAAGCGCTATTAACACGCCTGAAAACATCGAGTTATAGTAAGGC	Y	CGCTCTTTAACAACCAGGAA	Proteobacteria	Gammaproteobacteria
	IE	Q32CH6_SHIDS	CP000034.1	Shigella dysenteriae Sd197, complete genome	GCA_000012005.1_ASM1200v1_genomic.fna	2731483	2731136	TTAAAAACAAGGAATTAGCTGATCTTTAATAATAAGGAAATGTTACATCAAGGTTGGTGGGTTGTTTTTATGGGAAAAAATGCTTTAAGAACAAATGTATACTTTTAGAGAGTTCCCCGCGC	Y	TGATCTTTAATAATAAGGAA	Proteobacteria	Gammaproteobacteria
	IE	Q3A5Y9_PELCD	CP000142.2	Pelobacter carbinolicus DSM 2380, complete genome	GCA_000012885.1_ASM1288v1_genomic.fna	1134168	1134473	ATAAATTTTGATCAGATTTTTTGGTGCAGTTTTTCGGTCTTTGAAAACCTAATATTTTCATGTGCTTAAAAATA	Y	CGGTCTTTGAAAACCTAATA	Proteobacteria	Deltaproteobacteria
	IIID, ID	Q8YWN5_NOSS1	BA000019.2	Nostoc sp. PCC 7120 DNA, complete genome	GCA_000009705.1_ASM970v1_genomic.fna	1836368	1836553	TTAACTTGTGCGTCAACCTATAGGTGTTGGGCAAACACACTGAAATTTATCGTCCCAAACCCTTCCCACTCATGCTTTTGAACCCTCCAACACCACAATTGAGGTTGACGCAAACACCCCAAACCCTCACCATAAATACTTTTGCACCAATTTTCTCCAATTCACTCTTGACAACTCAGCTTCCGAAAAGCTACCTTAATCTGAGATTGACGAAACAGAACCTTGAAAACCAAATACAGCAAGCTTTCCACACCTGGGC	Y	AGAACCTTGAAAACCAAATA	Cyanobacteria	Cyanophyceae
	IC	S6BF78_9GAMM	AP012978.1	Endosymbiont of unidentified scaly snail isolate Monju DNA, complete genome	GCA_000801295.1_ASM80129v1_genomic.fna	2452145	2452432	TTGATCAGAATATCGCGAACCACCAGCCCACACCCATTATGCGGCAGGTTCGCGATGCTCTTTCACAATTCAAATCAATCACTTGCAAGAGACGCTTTCAATCTGTAACGAGAAAATGGCCGTGACCAGAACAGGTTCGCGCATCTTGTCCCGTTCCGGCAGCGCATGTCTGCACTTACAATAAC	Y	TGCTCTTTCACAATTCAAAT	Proteobacteria	Gammaproteobacteria
	IC, IIC	V5WDY1_9SPIO	CP006939.1	Salinispira pacifica strain L21-RPul-D2, complete genome	GCA_000507245.1_ASM50724v1_genomic.fna	615566	615279	TTAAATCCTCTTTTGCGAACGCCAATCATTCAGAAAATCCCGAACCTTTCGCGCATAGAATATTTCCTTGCATTATAAAGATCTTTGACAGAAAAGAGAAGGAATCTATAGTTCCAGGCAACACCAGAAAAATAGGTTCGCGATATAATGCCACTAACATATTATACCATAATGATATATAATGGGGT	Y	AGATCTTTGACAGAAAAGAG	Spirochaetes	Spirochaetia
	IB	W0JHW3_DESAE	CP007051.1	Desulfurella acetivorans A63, complete genome	GCA_000517565.1_ASM51756v1_genomic.fna	545151	545429	CTAAGTAAATTCCACATTAGCGGTTCGAGAAAAAATCGCACGATCTTTGATATAAAAATACTATACAAATCAATTTTATTTGCTAAAATTTAAT	Y	CGATCTTTGATATAAAAATA	Proteobacteria	Deltaproteobacteria
	IE	W0TLC3_9GAMM	AP012273.1	Thiolapillus brandeum DNA, complete genome	GCA_000828615.1_ASM82861v1_genomic.fna	1630293	1629994	ATGACATGGCTCTTTAATAACAAGGAACCCAATAAAAACAGATGCTTACGAATTGCCGAAAAAACCTAAAAATCGGTAAAATTTTTCAGTCTGCTTTTTCTTTTTAAGATCAATCGATTATGATTG	Y	GGCTCTTTAATAACAAGGAA	Proteobacteria	Gammaproteobacteria
	IE	W0V7D9_9BURK	HG322949.1	Janthinobacterium agaricidamnosum NBRC 102515 = DSM 9628, complete genome	GCA_000723165.1_JAG1_genomic.fna	3464908	3464615	GTAGTCCAACGCGCCAATCGCACCGCTCTCTAACAATCAAAATCTCCCCCCTGAAATCGGTAGAAAATTCACCTGTCGTTTAAGCCATTGTAATCAATGACTTATAATTGG	Y	CGCTCTCTAACAATCAAAAT	Proteobacteria	Betaproteobacteria
	IE	W1E4C8_KLEPN	CP003785.1	Klebsiella pneumoniae subsp. pneumoniae 1084, complete genome	GCA_000294365.1_ASM29436v1_genomic.fna	2328775	2329011	GTAATACGTGGATATTGTGGTTAAACTCTCGCTCTTTCACAATATGTTGG	Y	CGCTCTTTCACAATATGTTG	Proteobacteria	Gammaproteobacteria
	VIB1, IIC	A0A0B7I9C3_9FLAO	CP002113.1	Capnocytophaga canimorsus Cc5, complete genome	GCA_000220625.1_ASM22062v1_genomic.fna	1578965	1578630	TTAGAAGTAGAATGAAAAAAATGGATTTACTCAGCCCGATTTATTCTTTTTTTGCTCAATTTTTTATTTCTAAAAACAAAAATAATCCTCTGACAGACAGAGGATTATTTTTTG	N
	IIIA	A0A0E7ZHF4_MYCTX	CP003248.2	Mycobacterium tuberculosis H37Rv, complete genome	GCA_000277735.2_ASM27773v2_genomic.fna	3123976	3123638	TTGACATCATCAGCAGGCATTGTTACCACACGCTGGACGAATTGTCCATAG	N
	IC	A0LDG7_MAGMM	CP000471.1	Magnetococcus marinus MC-1, complete genome	GCA_000014865.1_ASM1486v1_genomic.fna	4406927	4407211	CTAATACAACGCGCACCCCAGGTTCACACGCTTTTACTGGCGCATTCGCGTTTTTATATTCCCATGTTTTTCTTTGGTTTTTTATTCTCATTATGCGAATAGATGCCCATTTTTCCCCAAAAACTGAACGGTCCGCGCAAACCGTCTGTTTTTATCATAGAGATCACTATGTTATAATCGCG	N
	IB	A0Q251_CLONN	CP000382.1	Clostridium novyi NT, complete genome	GCA_000014125.1_ASM1412v1_genomic.fna	1855665	1855381	ATAAAAATTATTTTCCCAATCGATTCATAAAGTAAAATCGCTTAAACCTCTTAATTTAAAAGGGTTTGATAAGGTTTTTTAGTGAAAAAATTAAATAATCAAAATCGGTTGGGAAAAAATTAACGAAAGTCTTTATTTTCAATACTTCCAAGGGTATAATGAAAATAAGGAATGGCTATTTTACTG	N
	IC, IIIA, ?	A1BGD1_CHLPD	CP000492.1	Chlorobium phaeobacteroides DSM 266, complete genome	GCA_000015125.1_ASM1512v1_genomic.fna	1633517	1633230	ATGACGCGCGAACATCAAGCTGCACCTGAAATTCAGGGATGTTCGCGATAGATCTAACAGCTTTATTTATATGAACTTATTTTTTTCATTGTCAGGTTTGCGTAAATTGTTATTTGGCATACGAAATGGTTCGCGGATAATGCTCCGCAGGCCATGGAATACCTGACACGATAGATTGAC	N
	IIC, IF	A1WH95_VEREI	CP000542.1	Verminephrobacter eiseniae EF01-2, complete genome	GCA_000015565.1_ASM1556v1_genomic.fna	1370161	1370463	TTAGACCATGAGGCGACTTTCCTGTCCTCGGAAGACGAAAATTTCCTTAAGAATCAATCGGTTAGCGCATTGA	N
	IIID, IIID, IB	A3DHR9_CLOTH	CP002416.1	Ruminiclostridium thermocellum DSM 1313 chromosome, complete genome	GCA_000184925.1_ASM18492v1_genomic.fna	3482377	3482117	ATGAATTTGTCGATGTGGAGTAGTGCAAAAAACCCGGGGGATCGACGAAATTTATTAATTCCCTTTAAACGCTGATTTGTAGCTGTTTAGAGGGATTTTTTGTTTTTTTGTATTGATTTTTATTTTGCAATTGGTTAAAATAAAAAGCAGAAGTTTAGCAGGCTTTAT	N
	IB, IC, IIIA	A4J390_DESRM	CP000612.1	Desulfotomaculum reducens MI-1, complete genome	GCA_000016165.1_ASM1616v1_genomic.fna	1079414	1079731	CTAAAGTGCGAATTCTAAGTAAACATGAAAAACTAGGTGTATCGCAAGTCCTAGTTTATAAGGGATTGTACACAAAACTGCCGTAAGATTAAGGGTAAAAAAAACAAGATAAATGTAGGTTCGCGAAAACAGGTATTTTAACCCTTAATAAATAAGGTTTTACGGCGAATG	N
	IB, IIID	A4X3M3_SALTO	CP000667.1	Salinispora tropica CNB-440, complete genome	GCA_000016425.1_ASM1642v1_genomic.fna	1118383	1118123	CTGACCTGCACAGATGCACAACCGCCGGACCGCTGCAAAATCCGACAGGACCGAGCCCGGAAAGACGGCCGTGACCTGCGACTTAAGGTT	N
	IE	A4XYT6_PSEMY	CP000680.1	Pseudomonas mendocina ymp, complete genome	GCA_000016565.1_ASM1656v1_genomic.fna	4140213	4139917	TTAACAAAGAAAAGTTGGTAGATTTATAGCGACTAATTTTTTCTTTTAGGAACAATTAGTTAGGCTAA	N
	IIIC, IB, IIIB, IC	A5D0R4_PELTS	AP009389.1	Pelotomaculum thermopropionicum SI DNA, complete genome	GCA_000010565.1_ASM1056v1_genomic.fna	2103037	2102750	TTGAAATGCGCGGATCATAAGTGATCGCCAAAACACGGGGGTATTCGCACCTCTTTTATCCTTTGGCTCAAGACCCGTTCATCCAGGACGGGAAGTAAAAAACATTTTATATAAACAGTGGGGTTCGCAAAAACAAACTGGATGGTAGCAATAAATAAAGGCGTTATAACATATACA	N
	IF	A5EW98_DICNV	CP000513.1	Dichelobacter nodosus VCS1703A, complete genome	GCA_000015345.1_ASM1534v1_genomic.fna	1078540	1078262	ATGATCATCTAAACGCCCAGATTCAAGCGGAGGCATGGATTAAGTATCCTCCAAAAAATATGAAGCAGCCAAATAGGCTGCTTTTTTTATTGTCTAAAAAGTCATAAGGTTAGCAAAACAGATTAAAAACATCTCTATTTGTATTTCTAGTGTTGCATATGTTGCACTTACTAAATATTATAATTAATACATTGATAAATAAAGAAAAGAGGTG	N
	IE, ?	A5G527_GEOUR	CP000698.1	Geobacter uraniireducens Rf4, complete genome	GCA_000016745.1_ASM1674v1_genomic.fna	3159449	3159162	CTGACGCGAACCTGATGCACTGGCAAAAACATGGGCGGTTCGCGGATAGATATTTCGTTGATTTTAAACTATTTTTCAGGAGAGTGATGAGCCTCTGGCCTTGCTCAGGCCCCAAATTCCCTGGTTCGCAGAATCGGGGATGTAAGTTGCTGTAATCTGTCGCCAATAAATGGGGAC	N
	IC	A6LB83_PARD8	CP000140.1	Parabacteroides distasonis ATCC 8503, complete genome	GCA_000012845.1_ASM1284v1_genomic.fna	1379958	1380245	ATAATTTATGCGAATGTAGAGTATTACGAAAAAAGTAGTATTTTCGCACCCCTTAATAATTAGCAGATTAACCCGTCTTTAAGGCGATTGCAGCCATTAAGCTGAAATAAAAATGAGAATTCGCATATTAATAGGTCTAATTTATTGACTTATAATATGTAACTTTGCACAG	N
	IB	A6LJW6_THEM4	CP000716.1	Thermosipho melanesiensis BI429, complete genome	GCA_000016905.1_ASM1690v1_genomic.fna	360967	360710	TTAGAAAAATCTGTCGATGTGTAATAGAAGAAAAACTCCGGGAGATCGACAGAAAACAGAATAACATTTTTGTAACTTAGGAATACATTGTGTTAATTATGTTAAATTTAATATGATATAGTTTCAAAAGTATTGCTCTTGAGAAAGAAATATGATAGAATATTAATGGATTCTA	N
	IC, IB	A6TNS7_ALKMQ	CP000724.1	Alkaliphilus metalliredigens QYMF, complete genome	GCA_000016985.1_ASM1698v1_genomic.fna	1762246	1762533	TTAGTGCGAACCTTTAGTTAACATGAAACGCCTAGAGCACTCGCACCTAAAATAGAAGGATTTTTGGTGCATAATAGTTAAAATATGCAATGAAAATCATTGTTTTAATAGTAAGAATGCAAAAGATGGCTAAAAAGTCAGGAAATTAGGTAGATTTTAGCTCTTTTTTGC	N
	IIC, IC	A6VLA9_ACTSZ	CP000746.1	Actinobacillus succinogenes 130Z, complete genome	GCA_000017245.1_ASM1724v1_genomic.fna	436081	436404	TTAAACCGTATTTTTTAAGTAATAAAAAAGCCTTGAAACGTTATATTTCAAGGCTTTTCAGCGTCC	N
	IB	A7GQ86_BACCN	CP000764.1	Bacillus cytotoxicus NVH 391-98, complete genome	GCA_000017425.1_ASM1742v1_genomic.fna	2126872	2126612	CTAAACACGATTTTATAATATATTAGGAGTAGTTTTTTTCTTATTAGTGAGAAGTTTGCAGTGCATCGTTTTTTAGCGAGTAAACTGCCAACCTCTTGTCTGTTAAAGGATGGAGCGTATTTTTGAAAATACTTTTGAAACACGACTCAACATCCGCTGCAAGATTTGGAAGTCTTAATGTAATGTGTTCCTTGATTTAAAAGGGATTATAGTGTTTTTTTATAG	N
	IB	A8L916_FRASN	CP000820.1	Frankia sp. EAN1pec, complete genome	GCA_000018005.1_ASM1800v1_genomic.fna	1686128	1686388	CTGACCACATCGATCAAGGCCTTGACCTGCGGTGTTGCACTACCGGCGGACCGCCGCAGAACGGGCCCACGACCGGCCCCGATCATGCCTGCTGACCTGCACCTTTACACT	N
	IE	A8LN07_DINSH	CP000830.1	Dinoroseobacter shibae DFL 12, complete genome	GCA_000018145.1_ASM1814v1_genomic.fna	396006	396347	TTGATGAATTTTTTCCAGATTGCCTCACTTGTCCTCTTCCAAAACCACTGTTGTTTCAGGGGCTTGGAAAAGGAAC	N
	IIIA, IE	A8ZZ20_DESOH	CP000859.1	Desulfococcus oleovorans Hxd3, complete genome	GCA_000018405.1_ASM1840v1_genomic.fna	3589698	3590012	TTGACAACCAGATTAAATTGGGGCAACAAGGCCGAAATGACCGGTAGAAAAAACAAACTGCAAAAATACTTCTAAAAACAAAAAGTTCGAGGAA	N
	IIIB, IIIB, IIID, ID, IIIA	A9AX67_HERA2	CP000875.1	Herpetosiphon aurantiacus DSM 785, complete genome	GCA_000018565.1_ASM1856v1_genomic.fna	2842050	2842331	TTAGCCCAAAATCGATCGAGCAGCACAGCCCATGCATGCGTTAGCCTGCGCTGCTCGATCTGACAATGTATAGAAGATATTATTGATAATAAAGGCCAAAACAATATATATTTGTAAAGTGTTTTTACACACCATGTGCCCTTGCGCAGAGCAAAAATCTATCCCAACAGCTGCCGCTCGATCTTTAGCCGTTTTAGTGTGTTATAATGCGCCCAGATTTGGGGGA	N
	IIIB, IA	A9GDG0_SORC5	AM746676.1	Sorangium cellulosum 'So ce 56' complete genome	GCA_000067165.1_ASM6716v1_genomic.fna	12786803	12787096	GTGAGGCGGAGGATCAAGCACCGGCGCGCGATTCCGCGCGCGCCCTGATCCTTGACATTCGAACCCAGTGATTACGATAATTTACGTCGTGCTGAGGGCTGGGCGGGTGCGTGAATGGCCGCCGACGCGGGGGAAGGTGCTGCTGGACGAGGGGCGCGCACGGGAGCGGGGCGCGCGTGGCGGTCTGGGAAGGGAGGAGCTTGCTGGAGTGGAAAAATTGGTGAATGATATCAATTGCTTGTGGTGGGC	N
	IIC, IE, IC	A9HKP7_GLUDA	CP001189.1	Gluconacetobacter diazotrophicus PAl 5, complete genome	GCA_000021325.1_ASM2132v1_genomic.fna	387917	388243	GTGATTTCGGCGTCAAAAAACGCGGAAATCACAACAGTTCCAATTACTTCCCTGCAAGG	N
	IIC, IC, IIC	B1GZ59_UNCTG	AP009510.1	Uncultured Termite group 1 bacterium phylotype Rs-D17 DNA, complete genome	GCA_000146025.1_ASM14602v1_genomic.fna	106296	106619	TTAAATAATTGAACCGGTATAACCGGCATCTTGCGAAATAATTCTTGTTAGAGTTTACCCATAGTTATTTTATGAAATATTTTTTTAAAAATCAAATTCTTATTGTTTTTAATTTATAAAAAAATCAAAAATTTATAAAGAAAATTTTTACTTTGTCTTCTTAAAATAAGAGTTGAG	N
	IIIB, IA	B1WUU8_CYAA5	CP000806.1	Cyanothece sp. ATCC 51142 circular chromosome, complete sequence	GCA_000017845.1_ASM1784v1_genomic.fna	1202998	1203288	CTAAAAATGCAAGCACCTCTGATTGTTTCTTTTTTTCTGTCATGCCAACTGCTTCTAATTCAGAACCTAGAAGGGTTTGACAACTTTTTAGAACCTTCAAGGTGCTTGCAAAATGCTGTAACCCTTTTCTGATGATGTTTTTAGCTAACGGGTTCAACTCTGAACGGGTCACTTTTAGCCAGTCCCTAGCCATTTTGCGAAGGTGCTTGTAAAATTGATTAAGAGCGTAGATTTATTAAGGCTTTCAGCCGTCGC	N
	?, ID, IA, IIIB	B1XPQ3_SYNP2	CP000951.1	Synechococcus sp. PCC 7002, complete genome	GCA_000019485.1_ASM1948v1_genomic.fna	1864128	1864418	CTGAAATGTTGCAAGCAATGGGGACTGTTTGGGGCGATCGCCTTTTTAAAATCGCTCAAAGAATTGGCTACTGGGCTTTTGCAATTTATCAGCAGCGGCTTAGATCCCTGTTTTTTCTGAAAACGCCTACCCTATCTAGGTTTCAGGAACATCCAATCAAGCTAAATTTTCTTCAAAGAGCCTCAGCTTGCTATGATTCACTAGGAACCTTGCAAAAGTTACCCAGAAGTCTTGCTCAGACTAAATTCTAGGACGCGCTA	N
	IIC	B2KB48_ELUMP	CP001055.1	Elusimicrobium minutum Pei191, complete genome	GCA_000020145.1_ASM2014v1_genomic.fna	265602	265925	TTAAATTGAGGCTGGCTCCAATCGCCTTCTCGCCAATTTTTTAATACTTTACTAAAAAACTTCTTTGAACCAGTAAGCTGGCATTTTACGAAAAAACTCTTATTAGAGTTGCCCATTTTTTAAAAAATTTCTTAAAAATCCCCGAGATTTTAACTATATTTTAGTATTTTTTATAAAAAATAATTTAATTTTTTATACGGAAAATTGAGTTTAA	N
	n/a	B2UP47_AKKM8	CP001071.1	Akkermansia muciniphila ATCC BAA-835, complete genome	GCA_000020225.1_ASM2022v1_genomic.fna	2439337	2439029	GTAAAAATATCGGACGCCGTATTTTTTTATAAGTCGCTGAACATAAAAATAAGGCACAGTA	N
	IIID	B3E1C7_METI4	CP000975.1	Methylacidiphilum infernorum V4, complete genome	GCA_000019665.1_ASM1966v1_genomic.fna	825612	825265	GTGAAACTAAGTTGGGATGGCGTTTT	N
	IE, IIIC	B4S8P6_PROA2	CP001108.1	Prosthecochloris aestuarii DSM 271, complete genome	GCA_000020625.1_ASM2062v1_genomic.fna	1538645	1538343	ATGATCGGGCGGCTGAAAGCCCTGTAAATTCCA	N
	IC, IIIA	B4SAV4_PELPB	CP001110.1	Pelodictyon phaeoclathratiforme BU-1, complete genome	GCA_000020645.1_ASM2064v1_genomic.fna	1761586	1761873	ATAAACGCGAACGTCAAGCTGTACCTCAAATCCCGGTATGTTCGCGATGTTCATATTCTCTTTATTTTGTTGTTGTTATAGTTTTTTGTATCAGGTTTTCGTAAAATGTTATTTGGCATACGAAATGGTTCGCGTTTAGGCGGCTCTAACACCATGAAATGCCTGATTTTACAGTTAG	N
	IC	B8DQ56_DESVM	CP001197.1	Desulfovibrio vulgaris str. 'Miyazaki F', complete genome	GCA_000021385.1_ASM2138v1_genomic.fna	2444216	2444503	GTAGCGGCCATTGCCGCGCGAACCTGGGGCGTACGGGTATTTCCCGGCAGGTTCGCGCGGGATAAAACCCTAATGTGGAAGCAGGATGCAACGCCACTCCTTCTGAAAGGCACGAACATTGTTCAAATGGCGCGAGGTTCGCGGATGTCATCCCCGTGATGCCCGTCCCGCATACATTTTCAGAATGGC	N
	IE	B8FDI2_DESAA	CP001322.1	Desulfatibacillum alkenivorans AK-01, complete genome	GCA_000021905.1_ASM2190v1_genomic.fna	6092898	6093188	ATAGCAAGATGTTGTTACTGGGATAACAAACGCCGACAAGATGTT	N
	IC, IIC	B8I083_CLOCE	CP001348.1	[Clostridium] cellulolyticum H10 chromosome, complete genome	GCA_000022065.1_ASM2206v1_genomic.fna	3653337	3652993	ATGAAACATTTATTTTTTTGCACAATAAAAGCTTTAAAATCCTGTGAAATCAAAGCTTTTATTGAATGGT	N
	IB, ?	C0QR17_PERMH	CP001230.1	Persephonella marina EX-H1, complete genome	GCA_000021565.1_ASM2156v1_genomic.fna	1268465	1268728	GTAAAATTTTTTAAATATTGCACTAGAATAATAATAGTTTTATAAAGGATACATGGAAACAGAATATGTTTAACATAGGATTTATCTCAAAATAAAATGCATTCTGAGTGGAGAAAACTCAAATTTTTAATCATTGATAATCAACGCTAATAAGTTTATGCAAATAAATATAATTGCATTACTACAGGTTTAATGCAGATTACTTATTTTTGAAAAGATGTATAAAAGCAGAATGATCTTTCTCTAAACGGCTTTATAACTTGCTAAACTATTTATTTTTTTATACTTTTAGGCAGAT	N
	IE	C4ZJY4_THASP	CP001281.2	Thauera sp. MZ1T, complete genome	GCA_000021765.1_ASM2176v1_genomic.fna	2517700	2518008	TTAACAAATTGGGAATATGGTTTCTTGAGTTTTCCTTTTTGAGTCATGGGCTTGACTTCAA	N
	IC, IIIB	C5BP89_TERTT	CP001614.2	Teredinibacter turnerae T7901, complete genome	GCA_000023025.1_ASM2302v1_genomic.fna	3465766	3465476	ATAAAAACGCTAACCACCAGTTCTCATTAAAACCCCGATAGGTTAGCGACTGTTATTTTCTATTTAATTTCAATGGGTTACTCAAGATTCGTCTTCAGTTAAAGGAAATTATTGTCAATTTTAGGGAGGTTAGCGAATATCACAATTGAAAGCCCCGGTATTAAAGGCTTTCAGAAGCTA	N
	IE, IE, IE, IIID	C7MTM4_SACVD	CP001683.1	Saccharomonospora viridis DSM 43017, complete genome	GCA_000023865.1_ASM2386v1_genomic.fna	1787035	1786757	CTGACTTCCCGGAGGAAAGCGAGGTGCGAACCCCACCCTGTCGCATCATGCAGCCATGAACGTACTGAATGAAATTAACGGCTTGCCTCGTTAAAATCCCAGCTCAACAA	N
	IC	C8WIJ7_EGGLE	CP001726.1	Eggerthella lenta DSM 2243, complete genome	GCA_000024265.1_ASM2426v1_genomic.fna	2312843	2312547	GTAGGACCATGGTGCGAGCACGAAGCTCGCATATGACATACGTGAGGTTCGCACCAAATAGTGTGACATAAAGATGCCTGACGCGCTTGTTGCGTGTACCTTGTTTGTCTATTGGCGCTATATGTTGATCGAGGCAGTAAATTTTGCGCATAATATT	N
	IE	C8XAY1_NAKMY	CP001737.1	Nakamurella multipartita DSM 44233, complete genome	GCA_000024365.1_ASM2436v1_genomic.fna	3359260	3358889	GTAGATTCGCGCTCGTGGATCCCGTCCTTGCAGGTCCGCAAG	N
	IIID, IC	C9LYV9_SELS3	CP002637.1	Selenomonas sputigena ATCC 35185, complete genome	GCA_000208405.1_ASM20840v1_genomic.fna	2189434	2189129	GTAGCAGGCATCTCCTTCGCGAGAATGGCCGCAAAATCTTTGTGCGAACCCGTATCACACAGAGGACTTTGCGACGAAAAATGCCTGTAACAGCATGGCCAAAAATGAGGTTCGCGAAAAATATAGCGCAACCGCTGTAATTAAGCCCGTGTAAACAGGCA	N
	IIC	CAS2_FLAPJ	AM398681.2	Flavobacterium psychrophilum JIP02-86 complete genome	GCA_000064305.2_ASM6430v2_genomic.fna	1325084	1325428	TTGAAAAATAGGATTTAGAAATATTAGACCTACCAGAATATCAACACACAAACAGAACTGTTTTTTAATTTCAAAATAAGCATATAACCACCAACATATCAAACGATTAACTCGCGGT	N
	IIC	CAS2_PARL1	CP000774.1	Parvibaculum lavamentivorans DS-1, complete genome	GCA_000017565.1_ASM1756v1_genomic.fna	104803	104501	TTGAAGCATGGAAGGGCGAAAGCGTGTGCCATTTCAATGGCTTGCCGGAAGGGC	N
	?, IIIA	CAS2A_NITEU	AL954747.1	Nitrosomonas europaea ATCC 19718, complete genome	GCA_000009145.1_ASM914v1_genomic.fna	140699	140385	GTAAAATATAATGTATCTGGAAGAAACAGTCGTTTAAAAAGAGGTAACTTGCAACATCCCATCAGTTTTCCTTATCGCCCTTTGCAATTTATTGATCTGGCGGAAGAAAAACACGGTGGTC	N
	IE, IE, IC, IIID	CAS2B_RHORT	CP003046.1	Rhodospirillum rubrum F11, complete genome	GCA_000225955.1_ASM22595v1_genomic.fna	529650	529985	CTGAACGTCCTGGCCCCTGCACGAAAAAACGCCCGAATCCTCAAGAAAATCAAGAGGATCCGGGCGGTA	N
	IC, IB	CASA1_MOOTA	CP000232.1	Moorella thermoacetica ATCC 39073, complete genome	GCA_000013105.1_ASM1310v1_genomic.fna	508035	507748	GTAAACCCGCGAACATATAGCAAGGGGCAAAAGGCCGAAAGGTTCGCGTTCTTTGGCGAATCAAGACCTGAAGCTAATTTTAGAGGTGAAGCATAATGAAGTATTCTAATTTAGTCATCAGGTTCGCGCAGAGTAGTAATATAGGGGTTGTCCGCCAAGGGTTTTAGCGCGAAG	N
	IC	D0KYZ1_HALNC	CP001801.1	Halothiobacillus neapolitanus c2, complete genome	GCA_000024765.1_ASM2476v1_genomic.fna	891213	890926	ATAAGCGCGAATGGTTATCAAAGGCGCAACCCCCGCACCTTCGCGAAAGAATCAACATCATGATTCATATATCAAATTTTCGAAATAAAAAACTAACAACGCTGAATTACTGGCTTCCCGAGTGCATTTCGCGGGAAAATGCCAAAATCCGCTTGTGTAACGTACCGTTACAAGAG	N
	IE, IE	D1A6P9_THECD	CP001738.1	Thermomonospora curvata DSM 43183, complete genome	GCA_000024385.1_ASM2438v1_genomic.fna	1043927	1044187	GTAAGAAGAACCTTCTGACCTGCACATCTGCACTACCGCCGGACCGCTGCAAAAACGCCCGACCAACCTCCCTGCGAGATGCCTCTGAGCTGCGACTTTACTCTC	N
	IIC	D1AUW4_STRM9	CP001779.1	Streptobacillus moniliformis DSM 12112, complete genome	GCA_000024565.1_ASM2456v1_genomic.fna	1158115	1157804	TTAGTGTGAATTTTGTGCTAATGGATTGATTATTTAAATTTCAAACTGTATTTTCTAGCAATAAAATTATATTAATTTCATTGCTAG	N
	IU	D2NTT0_ROTMD	AP011540.1	Rothia mucilaginosa DY-18 DNA, complete genome	GCA_000011025.1_ASM1102v1_genomic.fna	1377284	1376988	CTAGCCGCGTGCTGCTCATTCGCTAGCGACGCGCGGCAGGGGAGCGGAGGAATGACGAGTTCGATTGCGGACAGGTAGTAGAGGTGAGGATAATGGCCTTTGGAGGCTTTGTCTGTCTCCGCGAGAACCTGGCACATGACGTAATGTTGGCGTGTCGCTCGCGTGATGTTTTGGCTTGTCAATAGTGTTTAAAGGCCTGATTGGCTGCTTGGGTATACATTGATTT	N
	IC	D2RJ98_ACIFV	CP001859.1	Acidaminococcus fermentans DSM 20731, complete genome	GCA_000025305.1_ASM2530v1_genomic.fna	881739	882026	GTAAGCGCGAAGGGGAAGCAAACAGAAGGAACAAGCACCGGAAAATGGGGCTTGGGAGATCCGTGAACTGACTTTCGCGAAAAAAGACGGAAGCGCTTGATGCACTCAAGCTGTCCCGTCTGA	N
	IC, IF	D2UG58_XANAP	FP565176.1	Xanthomonas albilineans GPE PC73 complete genome	GCA_000087965.1_ASM8796v1_genomic.fna	3422967	3423254	TTGACGCGAACCCCAAGCGACCGGGAATTCACCCGCAGGTTCGCAAAAAATGCAAACTATTGATATAAAAAAGAAAGCCGACTCTCAGACCCTCCCCCCCCGGACACAAGAGCATGCAATCGCCCGGTCGAGATGCGATTCGCGAAAACAGGTTTTTTCCTCAAGCACACGCCAGGCTTTATCCTGACG	N
	IIIA, IE,IIIB, ?	D3PS05_MEIRD	CP005385.1	Meiothermus ruber DSM 1279 genome	GCA_000376665.1_ASM37666v1_genomic.fna	3050300	3050596	CTAAGCCACCCTGGCACTTGCTTTGCGCGAACCCCAAGCAAGTGCCAAAACCCA	N
	IIC	D3UFL6_HELM1	FN555004.1	Helicobacter mustelae 12198 complete genome	GCA_000091985.1_ASM9198v1_genomic.fna	25806	25516	TTAGGCTCGGTTTGAGGGGATGCTAGGCAGTTACCCCACAGAGGACCGAAAACTCTTTATTTTAGCCACATCCCACCTCCTGAAACTCCCTTCTTTAGGGGATCCTCAAGAGGTGT	N
	IE	D3V5E5_XENBS	FN667741.1	Xenorhabdus bovienii SS-2004 chromosome, complete genome	GCA_000027225.1_ASM2722v1_genomic.fna	3646061	3646351	TTAATTTTGATCGCGTTTTAGGCTTTTAAAGTGGTAGAATTTTTATGCTCAATAAAGTCATTTTAAAACAAATGGTTATATTTAG	N
	IE	D4HZR8_ERWAC	FN434113.1	Erwinia amylovora CFBP1430 complete genome	GCA_000091565.1_ASM9156v1_genomic.fna	2904012	2903665	CTGACATGCAAACCGCGGCTTTTGACAGCAAAAAATCCGGTAGATTTTGACGGGTAAAAAAAGCCGTTATGGTTCAATGGTTTGTATCTA	N
	IC	D4JZR3_9FIRM	FP929045.1	Faecalibacterium prausnitzii L2-6 draft genome	GCA_000210735.1_ASM21073v1_genomic.fna	2154986	2155273	CTGAGTTTTGCGCCCCGGTGCGAAGGGCGAGTTCTCAGCATTTTCCCGGCACCTTCGCACCGGATTTTTGTGTCATTTCGCATGATTTGGATAGTTCTTTGACCCGTTGTAAATCAAAGCTCTTCTAAATTCGTGCAAAATGTTGTATAATTTGTTTGAAAATAGAGATTTTGTCTCTGTTTTTGCT	N
	IC	D4LDY5_RUMC1	FP929052.1	Ruminococcus champanellensis type strain 18P13T draft genome	GCA_000210095.1_ASM21009v1_genomic.fna	1892352	1892639	GTGATCTGCGAACTGCCGGTAATTTGATTTTTGTGGGTTGTTCGCAAGGAAATGTCGCATGATTGTGAATAAGCAATGAACAAAATAGCGCTGTTTTGCGCATAAAAGTCTGTCCCGTGTGAGGGTATGACCTTGGAGACACAATATCTAG	N
	IB, IIIB	D4M9Y6_9BACT	FP929056.1	Fretibacterium fastidiosum draft genome	GCA_000210715.1_ASM21071v1_genomic.fna	1925069	1925317	GTAGTGGGCGGGAACGGGCTGGAGCGAGCTGAAACAATCCAGCCCTTTTGAGGTCCTGCGGC	N
	IB, IIC	D5BCA1_ZUNPS	CP001650.1	Zunongwangia profunda SM-A87, complete genome	GCA_000023465.1_ASM2346v1_genomic.fna	4768430	4768774	TTAAATGCTAGGATTCATATTGCTAGAATTTAACCTTATTTAAAAAGATAAAAGACCTGCTTTTTTTAATTCTAAAAAAGCATTTAAAACACAGGATACCAGGTTTTTAAACCTGG	N
	IF, IC, IIIA, ID	D5BYK3_NITHN	CP001798.1	Nitrosococcus halophilus Nc4, complete genome	GCA_000024725.1_ASM2472v1_genomic.fna	3003259	3003558	ATGACATAATGGTAATTTGCTGGGAACTTCGACCTCCAATGAAGTTGAATACTATTAGGATCGACGCATCTTTATCTGGAATAGCCGGTTATTTTTCCTTTATTATAATGTTGGAAGGTTATTCCAAGCCCTAATATAGAG	N
	IA	D5ECI8_AMICL	CP001997.1	Aminobacterium colombiense DSM 12261, complete genome	GCA_000025885.1_ASM2588v1_genomic.fna	115499	115218	ATAAAATGATTCAAGCACCTTCTTTTGAAATTATTTTTTTAAAGGTGCACTTCCTTCAATCCCTTATAAGAACTAGAAAAGGACAACTTATAAAAGTCTAAAAGTGCATGAGAAATACTATAACCTACTAATTCTAAGGGGTGACATCGGATACCTTAGGTAAAAAAACCAGAGAGAACTAAATTATAAAGCTATTCAGCTTCCATCATGAAAGGAGAAGAAACAAACGCTTGCAGGAACGGTGATTCCAATAGAC	N
	IIC	D5ESN0_PRER2	CP002006.1	Prevotella ruminicola 23, complete genome	GCA_000025925.1_ASM2592v1_genomic.fna	1570357	1570052	TTAGTATTTTTGCAACGATAATCCACAAAAACAAGCCACTTCTTAGGCTAAAAAAGCTTCGTAAATGCCTGAAAAACAGGCCAAAATTCAACC	N
	IC, IIIA, IIID, IB	D5X813_THEPJ	CP002028.1	Thermincola potens JR chromosome, complete genome	GCA_000092945.1_ASM9294v1_genomic.fna	1959722	1959435	TTAGTACAATAAGCGCGAACCATATGTGAACATGTTTTTTTCTGCAAAATCGCACCGCATAAAAATCTAGGGTTAATAGTTAACATCTGGTTTTTGGGGAACACTGTTTTTATTACCTAAATCCGGGATTCGCTATAATAAACTGCTTAACCCTTGAAGTGTCTTGCTTTATTTTAGGTG	N
	IE	D7BLB5_ARCHD	CP002045.1	Arcanobacterium haemolyticum DSM 20595, complete genome	GCA_000092365.1_ASM9236v1_genomic.fna	1911804	1912115	CTGAAAAAGCGCAGGTCAGTT	N
	IU	D7GII0_PROFC	FN806773.1	Propionibacterium freudenreichii subsp. shermanii CIRM-BIA1, complete genome	GCA_000091725.1_ASM9172v1_genomic.fna	444170	443871	CTGACGACCAGCGGCTCTGCGGCCCGGTTGTCACGCGGAGCCGCTCGCGTGATGTTTCCCCTTGTCACAAGCAGATTGCGCTGAAGGGGTCATCAATCCTCCACGCGCGAGCCATCCTTCTTCAGCACCGCTCGCAGGCGGCCGGTATAATGCCTAGTGGGAGCCCTGTTCCCACGCCCGC	N
	IB, IIIA	D9RZH0_THEOJ	CP002131.1	Thermosediminibacter oceani DSM 16646, complete genome	GCA_000144645.1_ASM14464v1_genomic.fna	73019	73279	ATAAAAAATGTCGTCGACCTCCGGTGATGCAAAAACCCCCGGAGGTCGACGACAAAGGCTAATTACGCTTAAAGTCAGAATTAACACTGTTTCAGAAGGATTTTTTTAGTTAGTGGCGAAATAAATATAGAAAATTAAATAAACGTTTTTTCTGCTTAAAACTTTAATTTTTTCATTATTTCA	N
	IIC, IIID	D9S6P3_FIBSS	CP002158.1	Fibrobacter succinogenes subsp. succinogenes S85, complete genome	GCA_000146505.1_ASM14650v1_genomic.fna	611803	612108	ATAAAAAACGTTCAAAAACAAGAAAAAATCGACCCCAAAAGGTCGATTTTTTCTTTTCGCAATGATACATCTAACTCGTTCATAGCTGTATAGTTACAACGAAT	N
	IC, IF	E0SIE1_DICD3	CP002038.1	Dickeya dadantii 3937, complete genome	GCA_000147055.1_ASM14705v1_genomic.fna	1730913	1730623	GTAACGCTGCGCTAACCCCCGGTACTCATCATTTTCCCGGCCGGTTGGCGCAATCTCATCCAATTGAATGATAAACAATTTATTTCTGTACTTCACCGTTGCGCCCTCAGCTTCCTCCCGCAGACATGACGTTGGCGTTCTTTTAGCGCTGACGCTATGCTACAAGCGCCTTGCCCGCAAGG	N
	IC	E0TGH1_PARBH	CP002156.1	Parvularcula bermudensis HTCC2503 strain HTCC2503, complete genome	GCA_000152825.2_ASM15282v2_genomic.fna	1519292	1519011	CTGAACGGCATTGGCGCGCGAACCCCATATTGTTGGCCATCCATCGGCAGGTTCGCGATTCCCTTAAATTATTGAATTATAATATAATTTTTCATTTTCTGGCAACAATCGCCCCTATCGCAATGGCAGATCCACCACAATCGCGGATCATCCACATTTTCCTCATCTACTACAGGATGTTACGTACCCCA	N
	IIID, IC, IIID	E1QHI8_DESB2	CP002085.1	Desulfarculus baarsii DSM 2075, complete genome	GCA_000143965.1_ASM14396v1_genomic.fna	1844314	1844601	TTAGCGCGAAGCGCAAGTGATGGGCAAAATGCCGGTGGGTTCGCGCATGGCTATTGAGCTGAAATCGTGGCTGTTTTGCGTTGCGCTGTTTTGCTGCGGCCGCTTTTTGCGTCTGAATGATGTCGGTTCGCGGTTTCGGCTTGATATGTTCATAAGTTTTAGTGTGTTATGATGGTGTA	N
	IC, IV	E1R0V9_SPISS	CP002116.1	Sediminispirochaeta smaragdinae DSM 11293 chromosome, complete genome	GCA_000143985.1_ASM14398v1_genomic.fna	1127824	1128114	ATAATGCGAAACTCAAGTTCACAGTTATCTTTAAAAAACTATTTTATTGGTATGTAAGGATTTATGAACGTTACTACTTGTTCTTTCACATAATTAGGGAAGGATTCGCAAATACTTAACAATAATTCATTTATATGTAATAATTTAGGATGTATA	N
	IC	E3F0V0_KETVY	CP002018.1	Ketogulonicigenium vulgare WSH-001 chromosome, complete genome	GCA_000223375.1_ASM22337v1_genomic.fna	1461511	1461798	ATGATGCGAACCCAAAGCGTGTCGGCCAACCCCCATCTGTTCGCAGCGCCCTAACCTGCTGTTTATAAAGAGACATATAGCGGCAGCTTCAGCCGGCCAGCGAATATGCTCCAAAAAGCAACAACGCTCGCATTCTCCCAAATCTTTTTCTTTCCATTTCAAAAAGATATACCCACCGGA	N
	IB	E3GHK7_EUBLK	CP002273.2	Eubacterium limosum KIST612, complete genome	GCA_000152245.2_ASM15224v2_genomic.fna	149300	149587	GTAGTTCTGTTTTACCAGGCACAGAAAATTTTAAAAAGTCAAAATCCTTTTAAACAAAAGGTTTGAGCGCCATTTGAAAGAAGAATTGACGAAAATCTCTGCGGCTGGTAAATTTGTAGAGAAATGGCTTGAAATCAAGGGTCTTAGAGAATATAAATAGAGGAAGAATGGCTTGATTATT	N
	IE, IE	E4N252_KITSK	AP010968.1	Kitasatospora setae KM-6054 DNA, complete genome	GCA_000269985.1_ASM26998v1_genomic.fna	7272635	7272952	CTAGAGAAGGCGCAGGTCAAAAA	N
	IC	E6SQG2_BACT6	CP002352.1	Bacteroides helcogenes P 36-108, complete genome	GCA_000186225.1_ASM18622v1_genomic.fna	3658376	3658089	ATAATGCGTGCGAATGTGTAGCATTACAAAAAAAGTAGTAATTTCGCAGACGTTAATAATCAGTAGATTGATTCATTTTGTGGAGCGTTTTTTATAATGAAGCTAAAAAGATAGTAATGGTTCGCATAATAGTGGATTAAACTTACTGGCTTATAATACGTTATTTAGTAT	N
	IC	E6U9V0_ETHHY	CP002400.1	Ethanoligenens harbinense YUAN-3, complete genome	GCA_000178115.2_ASM17811v2_genomic.fna	694050	693763	GTGACGGTGCGAAGGATAAGCGCGCAGACTTTTCCCGTGTGCTTCGCACCAAGTTATAGGCGAAATCCGTCTGTTTCAAGTCGATTTCATGTTTGAAAAAGCATGTTCCAGTAACGAAATTGGGCATTTTAACATGGAAACAACTCAAAAACATAGGTGATTTTTGCTGCTTTTGCT	N
	IC	E8RB04_DESPD	CP002364.1	Desulfobulbus propionicus DSM 2032, complete genome	GCA_000186885.1_ASM18688v1_genomic.fna	1701077	1701364	GTAAACCGGTCCGCGAACCGTCATCGCCCAGCAGATGACGGACGGTTCGCGATGCCTGTGGTTGCGACGGTTGACAAGGATTTGAGCAACAAGAGGAGGTGAATCAAGCCGCTCAGATCGGACGATCGCGGAACATGCTGGAAAAACTGATTCGTAATGCAATGTTGCGAGTCAGC	N
	IIC	F0P0P0_WEEVC	CP002455.1	Weeksella virosa DSM 16922, complete genome	GCA_000189415.1_ASM18941v1_genomic.fna	1977401	1977066	TTAGGAAATAAAAAAATGCTTGCAGAAAGAAATTTCTTCAAGCATTTTTTGTTTTTTTCTTTTGTAGATCATCTTATACATCACTCATAATCAATCTTTTATATAA	N
	IIC	F0RSU8_SPHGB	CP002541.1	Sphaerochaeta globosa str. Buddy, complete genome	GCA_000190435.1_ASM19043v1_genomic.fna	2367078	2366755	ATAAAAAAAGAGCTCCCAAAATAGGGAGCATTTTGCGACTTAAGTCTTATTAGAGATAATCGCTGGTTTTTGTTAAGATATAACCATCATAGAGTGACCTTTGCTCAAAGTCAAGGAAAATTGCTTTAATCACCTTGATTTAGTGCCTCAGAATCTCAGTTTTCTTCAGTTGGATGCTACACATTTTCTTTTCCCATTGGAATATATTCCAGTA	N
	IC, IC	F0SHD1_RUBBR	CP002546.1	Rubinisphaera brasiliensis DSM 5305 chromosome, complete genome	GCA_000165715.3_ASM16571v3_genomic.fna	5088317	5088030	GTGAGACCGTCGAAGCCTACCGCAGCCCCTGCGGTCCCCATGCGCGCTCACCAGCCCCGGGAGGTTCGCGATTGTTCTAAATCGCATTCCGGAAGGACTTTAAGTATGCTGGCATTCTGTCGTTGTCATAATTTCGGCCCCACTAGCTGCCGGTTCGCGAATCCTGCGTTCCAGCTGCTTTCAGGGAAAGACGTTACGCCAA	N
	IC, IIIB, IB	F0SWC9_SYNGF	CP002547.1	Syntrophobotulus glycolicus DSM 8271, complete genome	GCA_000190635.1_ASM19063v1_genomic.fna	1391612	1391887	CTAGGGTTTTGGATAATGAGGTTTTCTGTCGACCGGGGATAGTGTAATTTTTCCCGGAGAACGACAAAGCATTGATATGCCTGGAAAATGTGTATGATGACAGCAGACTTATCTGGGAAAATAGGTGTTGATTTTGGGTGCCACCGTATAGATCGACAGAAATTGAAGGTGGAGGCCTTGATATAGGCCGGTTTCAGGAAGG	N
	IIC	F2IKJ1_FLUTR	CP002542.1	Fluviicola taffensis DSM 16823, complete genome	GCA_000194605.1_ASM19460v1_genomic.fna	3607661	3607326	TTAGCTGTGGATAACTTATTGAAACTGTTGAAAAAAAAGAAGCCTATTCTCTTCAAATTGATCCAAAAAATGACTCTGAATTTCAGATAAACCATTTCTTCAGAATAAAAAAAAAGGAACGCTTCAAAAGAAATTGTTGAAAACTGGTTTGGTTTTTTAATTCTAAAAAACACTCTAAACCCCTACTGTACTTAGAAGATAGCCCAC	N
	IA, IIIA, IIID	F2ND02_DESAR	CP002629.1	Desulfobacca acetoxidans DSM 11109, complete genome	GCA_000195295.1_ASM19529v1_genomic.fna	1934135	1934509	GTAATCACGCAGCCAATTTTCACAATTGCACGTTTGCACGCATCTCCGGGGTTTTTCCTGAAATCGTCTAAGGTGTTGAAATTATTCAGTGTGGCAAAAAAGATACATTAAATGATAACTCTACGGATTAATTGGCAAATCTGGATATTTCACAAGATGCTCAAGCTGTGGCGGGGGGTATGCGGCCTAGATACGTGTTTTTGGCCTTTATTTTCCAACAAAACCAGCCCGCTGGAGGGGGTG	N
	IIIA, ?, IF	F4HFV5_GALAU	CP002667.1	Gallibacterium anatis UMN179, complete genome	GCA_000209675.1_ASM20967v1_genomic.fna	2474830	2475111	ATAATTTTGCTTAAATAATAATCATATTGGAGGTTAACTATGCAGTCATTCATACTTTTTGGCAAAGCCACTTTTAATTTATTGATTACTAATGTATTTTACAGTGTCGGG	N
	IC	F4KKD7_PORAD	CP002689.1	Porphyromonas asaccharolytica DSM 20707, complete genome	GCA_000212375.1_ASM21237v1_genomic.fna	1151362	1151649	ATAGCACTCAGACAAGTTCTCCCTTGTACTTCTCTGCGAATGCCAAGCGATCAGAGAAAAGGCAGACTACTCGCACAGGTTGATATACAAGCACATACCGCCTCGCAATCACCGCCAACGCACCGACATACCCGCTTGTAGTCTTCTATTCGCAATGGATCAACGTCTAACCTTCTATTTATGCGTACCTTTGGGCATCG	N
	IC	F5Y039_RAMTT	CP000245.1	Ramlibacter tataouinensis TTB310, complete genome	GCA_000215705.1_ASM21570v1_genomic.fna	3698912	3699199	GTAGGTTCGCGCGAACCTTGATCGTTTGCGTGTCGTCTTTGGGGTTCGCGTTCCCCTAAGCTCTTGATAAGTCCAGAATTTTTCAACCAAGCGTGAGTTAACGCTTTGTTTTCAGGCGTGGCTGCACCCGCTTCGCAGAAACGCGCAGAAAACTGGATGTAAATCATGAGGGTATAAAGGCG	N
	IIIC, IB, IIIB	F8A9H3_THEID	CP002683.1	Thermodesulfatator indicus DSM 15286, complete genome	GCA_000217795.1_ASM21779v1_genomic.fna	237940	238203	TTAGCCTCTCCAGCCGCCGGACGGCCGAGTATTTTTGCACTACTAGGGGTTAAGCGGCTAAAACGCAACTTTCGGAAGAATTGACTTTTCCTGAAACCCTTGGTATTTAAGTCTAAAATGCTCTTTGAACTGATT	N
	?	F8EMQ9_RUNSL	CP002859.1	Runella slithyformis DSM 19594, complete genome	GCA_000218895.1_ASM21889v1_genomic.fna	5771790	5772050	GTAATTTTCGGGACCCACGTTCCATGCTCCCGTTGTCCGGCGGTCGTCGATGGCTGATTCGGAGAGGTCTTTGACGTACTGCATTCTTACAAAATCCCTCACCATGGGGATAAGCCGTTGATTATCAGCCGTCGTCGAAGGTCCAATAAAATCATAGGATTGGCCTTCGACGACTTTTATGTTTGGAAATCATCAAAAAAACCCGCAAATTGACCCAAAATAGCCCTTTTCCCAACG	N
	IF, IC	G0A2R4_METMM	CP002738.1	Methylomonas methanica MC09, complete genome	GCA_000214665.1_ASM21466v1_genomic.fna	3369709	3369996	GTGATGCGAACCCCAAGCGAACATGGAAATCCCGCTGGTTTCGCATTTGCGGAAATGCCCAGTGTTTACGCCGATTCTTGAATTTTCCGGAAATACTTTAGAATGTTATTTGCGTTGATTTTGATCGGTTCGCATTTCATAGGCGCTTTTGCCTTTGAAATCAACCGATAACCTTAACGC	N
	IC	G2ISQ9_9SPHN	AP012222.1	Sphingobium sp. SYK-6 DNA, complete genome	GCA_000283515.1_ASM28351v1_genomic.fna	1915261	1915548	CTGAACAGCGACACCGAGCGCCGCGCGAACCCCAGTCTGTTGGACAAACAGTGGTAGGTTCGCGCGAAATATTTCGTCGTGTTTCCAGAAGGGTGGCAGATAAGCCGCCCACGTCACCCGATCGGAGTGCTGCAGAAGAAGGCGTCCGCGCCACCGCCAAGATTTACTGCTCTTTCTCATCGTATTAGCCAAGT	N
	IC	G2SY60_ROSHA	CP003040.1	Roseburia hominis A2-183, complete genome	GCA_000225345.1_ASM22534v1_genomic.fna	2765285	2764998	CTGAGAGTTTTTAGAGTAGTGCGAATGTAAAGTGTACATAAATACAGCGGAACATTCGCGCACAATTTATCAGTGCAAATAGCACAAAATCAAGTTATCGTCTGTGGAAAACGTGAAAGAGTAAAGGAATTTTTGGAAGAAAGCGTTGAAAACAGGAGGTCACAAAGGAATTTTATGTGTATATTT	N
	IC, IC, IE	G4ST89_META2	FO082060.1	Methylomicrobium alcaliphilum str. 20Z chromosome, complete genome	GCA_000968535.1_ASM96853v1_genomic.fna	2437757	2437455	GTAGCGCGAACCCCAAGTACTCATGAAAATGCTTGGGGTTTCGCAAAATGCCCAATCGATTGATTTATTTTGTATTCTTGTTATTGCATGGCGTCTGACTATAATGAATACCGTATTTGTTTCGATAGGTTCGCATTTTAAAGCGCGTAAAGCCTTTGACTTCAACCGATTGGGTAAAT	N
	IC	G7UW39_PSEUP	CP003093.2	Pseudoxanthomonas spadix BD-a59, complete genome	GCA_000233915.4_ASM23391v4_genomic.fna	3118836	3119123	CTGATGCGAACCCCAAGCAACCGGAAACAACCGGGCCGGTTCGCGCGCAGCTAAGTCATTGATCCGCATGGATGGGACCCCTGTGGTGGCCCCTGCAACCGATCGAGATGCGCATCCGTCAACTCGGTTCGCATTGTTGAGTCTTTTCCCCTGTCCAGCCAAGCATTTATGCTGAGGG	N
	IB	G8TQ72_NIAKG	CP003178.1	Niastella koreensis GR20-10, complete genome	GCA_000246855.1_ASM24685v1_genomic.fna	5990351	5990091	TTAGTCGTCGTTGTCATGTTATTGCAGAAAGGAAATATAGTTTTTATACTCCTGATTTTGGGAATTGCCGCACCGAAAGGCACTTGAAGAGGTTGTCGATGTCCGCAAAGAATCCCAGAAATGGGGAATGACAACTTTTTAAGTTCTAATAAAGATGTTTATTTCACTAGAAGGGCTGAAAAACAATGTTTTATTTTGCTGTAATAAA	N
	IB, IIIB	H2J403_MARPK	CP003257.1	Marinitoga piezophila KA3, complete genome	GCA_000255135.1_ASM25513v1_genomic.fna	289498	289755	ATAAGATTCTGTCGATATGGAATAATCAGTAAAATACAGGAATTAGACCGAAATTTTAATTTCGTTTTTGTAAAAAAAAATGACAAATAGAAAATTAAATAAAAAAATATGATATAATTCATCTATAATAATTATATTAATTAAGAAACTATAAAAAAATTAC	N
	IB	H6LHF2_ACEWD	CP002987.1	Acetobacterium woodii DSM 1030, complete genome	GCA_000247605.1_ASM24760v1_genomic.fna	3381291	3381016	ATAATTGTCGACCTGTGATCATGCAAAATTAGTAGGGGGTTGACAACGATGATTAAATTCACGGTTATATCAGTTTGGGAAAAGAAACGACATAATTATTTCCAGTGTTTGCTGTTAATTATAAAGGGTCGACAAATAAGACCGTTGAAATGCCCTGAATATAGGTATCTAACAAGCAC	N
	IB	I0GI14_CALEA	AP012051.1	Caldisericum exile AZM16c01 DNA, complete genome	GCA_000284335.1_ASM28433v1_genomic.fna	269123	269386	ATAATCGCATCGAAGGTATTTTTTGGCTTTTAACTAAAAGAACTGTATTTTATACAAGCTTGTTAAAGTTATTTATCACTATTAAAAAAATGGATTAGCGGGTCGATGCAAAAATGACCTCCGTTAAATGACTTTTATACAAAAATTTTACTTTTATGATATAATTATAAAAAATATGTAAACGTTAATGCCATCAGGCTTAGCTTACCTTGAAAATTATGCTATTTTTAAAAAG	N
	IE	I0HLZ0_RUBGI	AP012320.1	Rubrivivax gelatinosus IL144 DNA, complete genome	GCA_000284255.1_ASM28425v1_genomic.fna	709825	709529	TTAAAAAACTGGAAATGGGCGCCTCAGCTCGGTAGCGTTGGACGCGCCCAAAAGCCTGTTTGTTTTCAACGGGTTGGAGGAAGT	N
	IE, IE	I3Y6A9_THIV6	CP003154.1	Thiocystis violascens DSM 198, complete genome	GCA_000227745.3_ASM22774v3_genomic.fna	479752	480048	TTAACAATCGAAGACTAACCCCTTTGAAATTGGCCATTTTGCTGGTAGATTTATCCGCGCCTGATTTTCTTTTGAGGATCAGGTAAGTACGGGA	N
	IIC	I3Z8Z2_BELBD	CP003281.1	Belliella baltica DSM 15883, complete genome	GCA_000265405.1_ASM26540v1_genomic.fna	3443629	3443285	TTGATAAGGTTCGTAAAACTTTTCCAAAGTTCGAAACTTTGGAAAAGTTAAAATTGGTCAGTTCTCAATCTAAGGCTTCAGGATCCAATAGTTTTTTAAATTCAAAAATAATGTATAAAAAACAGCATACCAGCCACTTAACGTGGGG	N
	IIC	I4A2W6_ORNRL	CP003283.1	Ornithobacterium rhinotracheale DSM 15997, complete genome	GCA_000265465.1_ASM26546v1_genomic.fna	2223345	2223004	CTAGAATTAAAAAAATTATCAAAAATTTACTTCAAATAAAAAAAGGTTGCAGATTTCTATAATCCTAGCAACCTTTTCAACTTTTTGATTTACAAGCAAAAACAAGAAGT	N
	IC, IE, ?	I4C1T3_DESTA	CP003360.1	Desulfomonile tiedjei DSM 6799, complete genome	GCA_000266945.1_ASM26694v1_genomic.fna	911256	911543	ATAGAGGCGATAATTGCGAACCTGAAGCTCACATGAAAAGGCCCCAGGTTTCGCAGAAGATGCAACATTCTGTAATTATGAGAGAATATTATTGTCTTTCTGTGGAGGGATGGTCGGCATGCGAATGCCAAGATCAGGATCGCAGAACAGATGATTGTAAACACTCATTGATGCGGGTCTCAGAGCTCCG	N
	IU, IIID, IU	I6XZY8_PROPF	CP002734.1	Pseudopropionibacterium propionicum F0230a chromosome, complete genome	GCA_000277715.1_ASM27771v1_genomic.fna	2966674	2966393	GTGAGCCGCTGCGAGACCTCCGGTCATGTCGTCTCCCCTAGGGAGCGCTCGAAGGGGTTTGACTAGGTGTTTTACCCCATGACAACTCAACAGAGTGGTTTTATAGGACCCGGCGGTGCGGAGAGCTCGCAGGTGCTGGTAAAGTTCCTAGCCAAGGCGGCCTTCTGAGGCGAG	N
	IB	I6ZPS9_MELRP	CP003557.1	Melioribacter roseus P3M, complete genome	GCA_000279145.1_ASM27914v1_genomic.fna	931194	930934	ATAAAACGGTCGGACGCTATAAAAATGACGGGCTGATTAAGCTCGAATGCAAAAAAGTCGTCGACCCCCCGGGATTTTTGCACTATCGGAGGTCGACGACGCAAAGTGAAAAAAATACTTGCAAAACAGGCTGAAAATTATGAAATTTAGC	N
	IIC, VIB1	J9QTC6_RIEAN	CP004020.1	Riemerella anatipestifer RA-CH-2, complete genome	GCA_000331695.1_ASM33169v1_genomic.fna	870810	871112	TTAGGAATAGAAAAAGACTTTACATCAAACAAAAATAGAGAAGAAATAGTAAAAAATCTAATCCTATAAAAACGCAAAACCCATTGAAAAACAATGGGTTTATTTTTTGAG	N
	IB	K0AWT6_CLOA9	CP003326.1	Gottschalkia acidurici 9a chromosome, complete genome	GCA_000299355.1_ASM29935v1_genomic.fna	704313	704573	TTAAAAGGGGGATGTCGATCTGTAGTAGTGTAAAAAATACTAAGGATAGACAACCCTAGAGAAGATCTAATTTATAAATGGTTTTATATGAAAATTAATGTGAAAACATATGTTACTCTGATAGAAAAAGGACACATAGACAGAAAGTTTAATTGTGGCCTAGATAAATAGATGAATAGATCAAAACG	N
	IIID, IC	K9SIJ2_9CYAN	CP003592.1	Pseudanabaena sp. PCC 7367, complete genome	GCA_000317065.1_ASM31706v1_genomic.fna	2206131	2206421	TTAAGTTTGCGCGAACCTATAGCAAGGGCTAAATCCCTGGGGGGTTCGCGTTCTAATCCCTGTCAGCGTTTCGGCGTTTTTTGCTAAATTATGGCTTTTAATTTTAACCATGCTAAACCAGATCCGCGTAATTAACTCCTATGATCACCTCTGCCAAAGGATCTGGTATGATT	N
	IIIB, ID	K9T3U4_9CYAN	CP003590.1	Pleurocapsa sp. PCC 7327, complete genome	GCA_000317025.1_ASM31702v1_genomic.fna	2419274	2419549	CTAATTTGGGTTCACCCGAGAGCGAGGGCCTCGAAAAATCTTTAGAAAGCTTTTTTTTCGTTCAGCCCCTCGAACTCAATCTTAATAAGGGTTTCAAGATTTAGAAGTTCTTTTTTGTCGAGCAGGTAACTCCCTAAGCGCGACCCCCTCGCGATTGCCCTCTGGACACTAGTTGGGATATAGGTTTCAATAAAGAAG	N
	IC, IA, IC	K9UEQ3_9CYAN	CP003600.1	Chamaesiphon minutus PCC 6605, complete genome	GCA_000317145.1_ASM31714v1_genomic.fna	2089627	2089337	GTGACGCGAACCTCTAATGGTGTCTGTTTTCCTGGGAGGTTCGCGTTGCCTTACTGGGTAAGGGTTTAACTTGGTTGGCTTGATGTTTTGGAGGGTTGAGATGTTGTTAGTTTTTAGGGGTTCGCGTTGGAGAACGTTGAAACATTTGCTGTATATGGGTTTAAAATAGAAGC	N
	ID, IIID, IIIC	K9X6N8_9NOST	CP003642.1	Cylindrospermum stagnale PCC 7417, complete genome	GCA_000317535.1_ASM31753v1_genomic.fna	5965981	5966265	CTAGGGTTTCGGACGTTTTTTGCGCGGATGGGTGGGTGTAGAAATTTGATGGCGAAAAAAAATGCTTGTATCCCAACCCCAGCAAGGTTTTCCAGCCTTTTTCACTTAA	N
	IU, IA, ID	K9XHQ0_9CHRO	CP003646.1	Gloeocapsa sp. PCC 7428, complete genome	GCA_000317555.1_ASM31755v1_genomic.fna	3442379	3442669	TTAAAAATGCAAGTACCTCTGAATGTGGCAGCCAAATAAAGCATGAAAACAGCCCTGTGTACTGTTTTATATAGCTTAGAGGTTAAAAAAACACGTACTGAGGTGCTTGCAAAACGGCCAAACCCTTACTGTACAGGGATCTTGAAACCAAGGAAAGTATGTTTTTATTGTCCAATTGGTCATTTCTGGTCATCTATGAGGAGGTGCTTGTGTAATGTAGCAGGAATACTTACCAAGAAATGGTTTCAGCGTTCG	N
	IIIB, IA, ?, ID	K9XUL1_STAC7	CP003653.1	Stanieria cyanosphaera PCC 7437, complete genome	GCA_000317575.1_ASM31757v1_genomic.fna	3072704	3072414	GTAATGAAAACAAGCACCTCTGTTTGTTGAAGGCTTGTGGTGGGTTTGAATTGTTTTGATCCTATCTAGAAAAGGTATTTGAGAGTTTTTGAGGGTCACAATGGTGCTTGAATTTTTTGAAAACCAGACGGTAAAATGATTTCAAGCATTGCTTATTGGCATAGAAATGAGTTTTTTGATTCGGAGTTGCCATTTTGTTGGAGATGCTTGTAAAATTACCTCAGAAAGCCTACCAAATCTGGATTATGGCGACTGC	N
	IA	K9YKV5_CYASC	CP003940.1	Cyanobacterium stanieri PCC 7202, complete genome	GCA_000317655.1_ASM31765v1_genomic.fna	1196724	1196446	CTAATTGCGAGGGATAGCTGAAAACTCCTCAAACAACCAAAACTCGTTATATCCCTCGACTTCTTATGACACAAGGGATTGAGGTATCCATTTTAATAATTTCAAAGGTCATTTTGTTTAAGTTTTGCTAAGGTTCGCTAAGGTGCGCTGGACAGTAAGCAGAGCAAGGGGTTAAAATAGG	N
	IIID, IB, IC	L0EJ48_THECK	CP003255.1	Thermobacillus composti KWC4, complete genome	GCA_000227705.3_ASM22770v3_genomic.fna	3285432	3285172	CTGAACTGTCGTCGACCCCCGGTGGCGCAAAAACCCCCGGGGGTCGACGACAAGTATGGGATTTGGAAAATGCTGATCTATCAAGGGTTGTGTGATATACTGGGTGCGGATGATGTTAAGATGGGCTGAAATGCGCTGAGAAAAGAACTTGATTTCACGAGGATTTTTGG	N
	IB, IIID, IIIA	M1E8F9_9FIRM	CP002690.1	Thermodesulfobium narugense DSM 14796, complete genome	GCA_000212395.1_ASM21239v1_genomic.fna	806623	806886	TTAATTTATCTGTCGATTCCAAATAATGACAAATATATGATATATAGACAGAATTTCTTTTAAAATAAAAGCATAAATATTCAGCTTTTTTATTATTTTAAGTTTGGAACTTCATGTTTAATATGCTAAAATAGTAAGTTAAGTCTAGT	N
	IC	M1PKK5_DESSD	CP003985.1	Desulfocapsa sulfexigens DSM 10523, complete genome	GCA_000341395.1_ASM34139v1_genomic.fna	3933301	3933014	TTGACGATGTCGCGAACCTTAATGGCACAGTAAAACCCTGAATGGTTCGCAGGTTATGTTTACTAGTTGAAATGTTAGTGAATATTGGCCACTGTGTTTTGTGGTTTTATTGTTGAGATCTGTAAATTGTTGTAGTTCGCAGCAAAGCCACATTGTCATCAGTAACTGTGAAGTATTGCAGGCTGA	N
	IC, IIC	M4R4N9_BIBTR	CP006955.1	Bibersteinia trehalosi USDA-ARS-USMARC-189, complete genome	GCA_000521745.1_ASM52174v1_genomic.fna	1611145	1611468	TTAATAAAATCAACCATAAGAAAATTTTTTTTACGCTACACAAAAACTTTTGTTCAATTGGCGATATTTTGTTCACACAAATAAACTAAATCGGCAATTTTCCACAAAAAACAGAGAAAAATAAGCGGTCTGTTTTCAAAAAACTCTGCAAAATCTTGCAAAAAATTTCCAAAAACAGACCGCTTGTTTGGTATTTTTTCACGTTTTTTAATCGCTTAAAAACGCAATACCCCCTTATAACATAAGGCGTTCATACCACTC	N
	IIC	M4RZU5_9SPHN	CP004036.1	Sphingomonas sp. MM-1, complete genome	GCA_000347675.2_ASM34767v2_genomic.fna	1616196	1616522	GTGATTTCGGCGGCGTTTGATCCGCGAAAATCACAGCAGTTCCAATCCGTTACCGCAG	N
	IIC	M4VAS8_9DELT	CP003537.1	Bdellovibrio exovorus JSS, complete genome	GCA_000348725.1_ASM34872v1_genomic.fna	903901	903578	CTAATTTTTTAGGTATTTTTCAACCCCACAAAAACCCATAAACCCTTTTATTATCAAGGGTTTATGGGGCGT	N
	IC	Q1H3R0_METFK	CP000284.1	Methylobacillus flagellatus KT, complete genome	GCA_000013705.1_ASM1370v1_genomic.fna	632123	632413	CTGATCCGCTAATCTCCTGTTCTCATCAAATCCCTAAGGGGTTATCGCTTTTTAACAATTTGAATTGATAAGCATAGTAAGTAAATGGCGCATAGTTTTGGTAAACTTGCGCTATTCCGTAAGTAGTTAGCGGGATGAAGGTTCGCAACCCAGACCCCATGCAGACTTACAGCAATA	N
	IC, IIIB, IE	Q1J1U8_DEIGD	CP000359.1	Deinococcus geothermalis DSM 11300, complete genome	GCA_000196275.1_ASM19627v1_genomic.fna	219245	218955	GTAATCTCAGCGCGAACCCCCCGTGACCATGAAAACCCGG	N
	IIC	Q20XX6_RHOPB	CP000301.1	Rhodopseudomonas palustris BisB18, complete genome	GCA_000013745.1_ASM1374v1_genomic.fna	4997123	4996797	CTGATTTCCGCCTCGCGGTTCAGGCGGAAATCAGAGCATTTTCAGTCGTTTGTGCCGCTC	N
	IC, IB	Q24TU0_DESHY	CP001336.1	Desulfitobacterium hafniense DCB-2, complete genome	GCA_000021925.1_ASM2192v1_genomic.fna	4166428	4166168	ATGAAATTGTCGTCGATGTGCAGTAAGGTAAAAATCCCTGGAGATCGACGACAAGGGATGTCGCTTAGTAAGCGGCCTGCAGAGAATAGTGAAATTTTTGAGACGGCTCCAGGGAGCTGTAGATGTTGATTTTATGCGGGTAAA	N
	IIIB, IC	Q2LX07_SYNAS	CP000252.1	Syntrophus aciditrophicus SB, complete genome	GCA_000013405.1_ASM1340v1_genomic.fna	2753455	2753168	TTAAGCCGGCGCGAACATCAAGCTGTCATAATCTTGCATGGGAGTTCGCGGATGAAATAAGTAATTGATATTACGGATATTAAAAAGGATCATTAATCTTATTGTACACTAAATAAGTCTATCCTCTTACCATTCGCGGAAAGTCCTTGAAAAGCATCCTTAAAATCTCAATTTAAATGTAAAC	N
	IC, IE	Q60B34_METCA	AE017282.2	Methylococcus capsulatus str. Bath, complete genome	GCA_000008325.1_ASM832v1_genomic.fna	684923	684636	TTGAAATGCGCGAACCTCAAGCGATGCGAATTTGGCCGTGGGTTCGCGCAACTTCCAACTGGTTGAAAAACCAGTCGATAGCGGAGTCCTCCCCGATCCGCATCACGCCGGCGGACTGGCTCGACCACCCGTCCGCTCTTCCCTCGAAAAAAATCCTAGCTTATCATCAAGCTGCGGCAACG	N
	N.D.	Q6NKI1_CORDI	CP003217.1	Corynebacterium diphtheriae VA01, complete genome	GCA_000255255.1_ASM25525v1_genomic.fna	38951	39277	TTAGACTTCAGGTAGCCCAAAAAACCATGTTAAACAGGATTTTTTGGGCTACC	N
	IC, IF	Q7NYP3_CHRVO	AE016825.1	Chromobacterium violaceum ATCC 12472, complete genome	GCA_000007705.1_ASM770v1_genomic.fna	1292860	1293147	TTAAGCGCGGATGCCTGGCGCGAACCGGAAGTGGCAGCCGAATCCCTAGCAGGTTCGCGTGGGCGGGGGAGGCCCCGCGCCGCCTGCATCATTCTCCTTGAGCCCGGTGGGTAGGGCTTGGAAATCTGCCTCGCTGATCAGGTTCGCGTTTTTCGGTTGAAAATACCATTGGAAACAAATGGTTTGTAGTACCC	N
	IF, IIC	Q9CLT4_PASMU	AE004439.1	Pasteurella multocida subsp. multocida str. Pm70, complete genome	GCA_000006825.1_ASM682v1_genomic.fna	1323052	1322729	CTAAGTAAACTATTTACCTATTCTATAAAAATAGACAAAAAGACTATTCTCTATTTTAGCCTAGCGCATCTCAGAACCAGGGGTAACATACAACAGATGTTATCCCAGTCAGACAAAATCAATGACTTTTTAAGAAAAATTTTCTAAAAATAGAATGCTTAATATCGTGAATTCAAGTAATTTTTGAGCATTAAAAACGCCCTTATCCCTTGTGCCACAAGGGATAAGGGACACGA	N
	ID, IIID, IIIB	U5QGV6_9CYAN	CP003587.1	Gloeobacter kilaueensis JS1, complete genome	GCA_000484535.1_ASM48453v1_genomic.fna	2066345	2066617	GTGAACCAGCGTGCGCGGATGGGAGGCTGTAAAAATCCAAGACTCAGCCAGAAGGCCCTCAAACCCTCTCTGTGCTTGCCTTTCAACCCCCAGCCCTCAAAGATCGAT	N
	IC	V5SDN7_9RHIZ	CP006912.1	Hyphomicrobium nitrativorans NL23, complete genome	GCA_000503895.1_ASM50389v1_genomic.fna	1450100	1449813	TTGACGCGCCTTTTTAAAGAGCGCGAACCGCAAGCATGCCCGCTACTCCAAGCAGGGTTCGCGCTGCTCTACCGCACTGTATTATCTTATAAATTTCCATCCCATCACAGATTAATTGGCTACACAGGAGCGCCCGACGCATAGTTCGCGGCGGCGAGGGATTTTGACAAACCAAACGAGTAAGTTACCTACACTA	N
	?, IU, IC	W0DXX4_MARPU	CP007031.1	Marichromatium purpuratum 984, complete genome	GCA_000224005.3_ASM22400v3_genomic.fna	1292789	1292490	GTAGCCCCAGACGTCTATCGCCTGTGAAGTCTCCAACTACAGACTCCGACGCACGGCCATCAGCCTCCACACAAAGAAAGTCAACACAAGCATCATTCAACACTAGAGGAAACACATCAAAATCG	N
	IIC, IIIB	W0ES07_9PORP	CP007034.1	Barnesiella viscericola DSM 18177, complete genome	GCA_000512915.1_ASM51291v1_genomic.fna	578575	578240	CTAAATCTAAAAAGCCGACCATACGATCGGCTTTTTAGTGAAATACAGCTTTGATTTTAATTTCTAATAATTGCTATAATCGGTTGACTATTAATGAGCTATACAGATT	N
	IIC	W0SD18_9RHOO	AP012547.1	Sulfuritalea hydrogenivorans sk43H DNA, complete genome	GCA_000828635.1_ASM82863v1_genomic.fna	1353577	1353272	CTGAATCCAAAATCAAAAAGAAAAATCCCCGCCCGGCATAGACCGGGTGGGGATCAAGGTTCAGC	N
