# Supplementary material for: Transcription termination and antitermination of bacterial CRISPR arrays
Source: eLife journal article supplement (doi:10.7554/elife.58182), 2020-10-30
Supplement: supp [file elife-58182-supp-v1.zip › elife_poa_e58182_Supplementary_file_6.xlsx]

## Sheet: Sheet1
	Supplementary file 6. List of strains and plasmids used in this study
	Strain	Description	Source
	14028s	Wild-Type Salmonella enterica subspecies enterica serovar Tyhpimurium	Jarvik et al. (2010)
	AMD678	14028s PKAB-TG::Δcas3, FLAG3-cas5, PKAB-TG::CRISPR-II	This study
	AMD679	AMD678 ΔCRISPR-I::thyA	This study
	AMD684	AMD678 CRISPR-I boxA(C4A)	This study
	AMD685	AMD678 CRISPR-II boxA(C4A)	This study
	AMD698	AMD678 nusE(N3H)	This study
	AMD710	14028s PKAB-TG::Δcas3, FLAG3-cas5, suhB-TAP, PJ23119-thyA::CRISPR-II	This study
	AMD711	AMD710 CRISPR-II boxA(C4A)	This study
	KS1234	Vibrio cholerae classical biotype strain A50, KanR	Box et al. (2016)
	KS2094	KS1234 Δcas1	This study
	KS2206	KS1234 Δcas1 boxAmut (C4A, T5G)	This study
	BJO185	KS1234 Δcascade	Box et al. (2016)
	S17	recA derivative of Escherichia coli 294 (F- thi pro hsdR) carrying a modified derivative of IncPα plasmid pRP4 integrated in the chromosome	Parke et al. (1990)
	Plasmid	Description	Source
	pBAD24-amp	Empty pBAD24	Guzman et al. (1995)
	pAMD239	pBAD24-nusE	This study
	pGEM-T	T-Tailed cloning vector	Promega
	pVS030	pGEM-T-TAP-thyA-TAP	This study
	pJTW064	pAMD-BA-lacZ with constitutive promoter PKAB-TG	Stringer et al. (2014)
	pGB231	pJTW064 with CRISPR-II upstream region and up to spacer 2	This study
	pGB237	pJTW064 with CRISPR-II upstream region and up to spacer 2, boxA(C4A)	This study
	pGB250	pJTW064 with CRISPR-II upstream region and up to spacer 11	This study
	pGB256	pJTW064 with CRISPR-II upstream region and up to spacer 11, boxA(C4A)	This study
	pJTW060	pJTW064 with the ahpF terminator	Stringer et al. (2014)
	pKS958	Empty RP4-containing plasmid	Box et al. (2016)
	pAMD244	pKS958 with V. cholerae A50 protospacer 1	This study
	pAMD245	pKS958 with V. cholerae A50 protospacer 2	This study
	pAMD246	pKS958 with V. cholerae A50 protospacer 3	This study
	pAMD247	pKS958 with V. cholerae A50 protospacer 4	This study
	pAMD248	pKS958 with V. cholerae A50 protospacer 5	This study
	pAMD249	pKS958 with V. cholerae A50 protospacer 6	This study
	pAMD250	pKS958 with V. cholerae A50 protospacer 7	This study
	pAMD251	pKS958 with V. cholerae A50 protospacer 8	This study
	pAMD252	pKS958 with V. cholerae A50 protospacer 9	This study
	pAMD253	pKS958 with V. cholerae A50 protospacer 11	This study
	pAMD254	pKS958 with V. cholerae A50 protospacer 12	This study
	pAMD255	pKS958 with V. cholerae A50 protospacer 13	This study
	pAMD256	pKS958 with V. cholerae A50 protospacer 14	This study
	pAMD257	pKS958 with V. cholerae A50 protospacer 15	This study
	pAMD258	pKS958 with V. cholerae A50 protospacer 16	This study
	pAMD259	pKS958 with V. cholerae A50 protospacer 17	This study
	pAMD260	pKS958 with V. cholerae A50 protospacer 19	This study
	pAMD262	pKS958 with V. cholerae A50 protospacer 20	This study
	pAMD263	pKS958 with V. cholerae A50 protospacer 21	This study
	pAMD264	pKS958 with V. cholerae A50 protospacer 22	This study
	pAMD265	pKS958 with V. cholerae A50 protospacer 23	This study
	pAMD266	pKS958 with V. cholerae A50 protospacer 24	This study
	pAMD267	pKS958 with V. cholerae A50 protospacer 25	This study
	pAMD268	pKS958 with V. cholerae A50 protospacer 10/26	This study
	pAMD269	pKS958 with V. cholerae A50 protospacer 27	This study
	pAMD270	pKS958 with V. cholerae A50 protospacer 28	This study
	pAMD271	pKS958 with V. cholerae A50 protospacer 29	This study
	pAMD272	pKS958 with V. cholerae A50 protospacer 30	This study
	pAMD273	pKS958 with V. cholerae A50 protospacer 31	This study
	pAMD274	pKS958 with V. cholerae A50 protospacer 32	This study
	pAMD275	pKS958 with V. cholerae A50 protospacer 33	This study
	pAMD276	pKS958 with V. cholerae A50 protospacer 34	This study
	pAMD277	pKS958 with V. cholerae A50 protospacer 35	This study
	pAMD278	pKS958 with V. cholerae A50 protospacer 36	This study
	pAMD279	pKS958 with V. cholerae A50 protospacer 37	This study
	pAMD280	pKS958 with V. cholerae A50 protospacer 38	This study
	pAMD281	pKS958 with V. cholerae A50 protospacer 39	This study
