# Supplementary material for: Transcription termination and antitermination of bacterial CRISPR arrays
Source: eLife journal article supplement (doi:10.7554/elife.58182), 2020-10-30
Supplement: supp [file elife-58182-supp-v1.zip › elife_poa_e58182_Supplementary_file_7.xlsx]

## Sheet: Sheet1
	Supplementary file 7. List of oligonucleotides used in this study
	Oligonucleotide	Sequence
	JW4477	TTATTGGCGACGAAAAAC
	JW4478	TTAAACACGCTTTAGCAAAT
	JW6401	TGCTCCCGGCCGCCATGGTCCATGGAAAAGAGAAGAT
	JW6406	GCTCTCCCATATGGTCGACTCAGGTTGACTTCCCCG
	JW6445	CTAAATCCCGCGGCCATGGGTTGTCCACGGCTTCA
	JW6446	TGAAGCCGTGGACAACCCATGGCCGCGGGATTTAG
	JW6447	TGCTGAGACGGCTATGAAAGTCGACCTGCAGGCG
	JW6448	CGCCTGCAGGTCGACTTTCATAGCCGTCTCAGCA
	JW8568	TTCTATGAACTTTTTTGCATCAAAATCAGCAAATTAGCTGTTCTAGACAGCTGCATGCAT
	JW8569	CACCACATTCTACCAACATAATCGCAACAATTTAAATTATTAAAGTGTAGGCTGGAGCTG
	JW8570	GCATCAAAATCAGCAAATTAGCTGTTATTTAATAATTTAAATTGTTGCGATTATGTTGGT
	JW8571	ACCAACATAATCGCAACAATTTAAATTATTAAATAACAGCTAATTTGCTGATTTTGATGC
	JW8576	AAGACGTGCTTGACTTCATCTGCGCGTAAGGGGCGGCTTATGAGCGGCGGTGGCGACTAC
	JW8577	GCCCCAGGAGGCCATCGGCCCGTGAAGCTGAAAAACCAGATATTGCGCCGCCTTGTCATC
	JW8610	GGAGGAAGCCTCTTTGAGCGCTTCTTCCAGAAGAAAAAGGCGGCGCGGGATTTAGACAGC
	JW8611	GTTGTTAAAAGTGAAAAATTGTCCATATCTGACCTCCTAAACTTGGGGATTACCGTTATC
	JW8797	CTGTCTATGCAAACGCATAAATATTTAAATATCGCCTGATGCACGCGGGATTTAGACAGC
	JW8798	CACAGACGGCATCGGCAGGCCGTCTGTAAGATTAGTAAAAACTTGGGGATTACCGTTATC
	JW8904	TGGTTTCTTTTCTTCCTGTTGAAAATCAATAAGTTGAATGTTCTAGACAGCTGCATGCAT
	JW8905	ATAACAAACTACCAACGGTAAGATAACAATTCCTTATTATTAAAGTGTAGGCTGGAGCTG
	JW8906	TGTTGAAAATCAATAAGTTGAATGTTATTTAATAATAAGGAATTGTTATCTTACCGTTGG
	JW8907	CCAACGGTAAGATAACAATTCCTTATTATTAAATAACATTCAACTTATTGATTTTCAACA
	JW9305	CGTTGCGGATTATCGTT
	JW9306	TCCCATTCACCAACAACA
	JW9329	TGCATCAAAATCAGCAAA
	JW9330	TTTTTGTCAGCACCACATT
	JW9355	TGGCGAATATGCGCGACGAACTGAGCGATGCGCTGAAGCGCTCCATGGAAAAGAGAAGAT
	JW9356	AAGGCACGGCGGATGAGTGGCCCCATCCGCCGAAGAGACTTAATGGTCGACTCAGGTTGA
	JW9381	ATGAGGAACCGCTAGCTTACTAATCTTACAGACGGCCTG
	JW9383	TGTATATCTCCTTCAGTAAGATACAACTCTGCAC
	JW9441	ATAGCCGATTTGGCTATTTAACAATGCTCCCAATCGGGGAGCTTAGACAGCTGCATGCAT
	JW9442	TCACACCCATTACGATTGATGGGAGAGTGTAACCGTTCTTACGTGTGTAGGCTGGAGCTG
	JW9443	TGGAGCTCTGGTCTCATGCAGCACCAAAGAATCCGTAT
	JW9444	ATACGGATTCTTTGGTGCTGCATGAGACCAGAGCTCCA
	JW9605	TGTATATCTCCTTCAAATCGAAACCCCAGCCAC
	JW9627	CTGTCTATGCAAACGCATAAATATTTAAATATCGCCTGATGCATTGACAGCTAGCTCAGT
	JW9628	ATGAGTCACAGACGGCATCGGCAGGCCGTCTGTAAGATTAGTAAGTGTAGGCTGGAGCTG
	JW9660	GACTACGGTGCATTCGTT
	JW9661	ATTTCGCTCGGATGCTTA
	JW9674	GTTTTTTTGGGCTAGATGCAGAACCAAAGAATCCG
	JW9675	CAAAACAGCCAAGCTTTAACCCAGGCTGATCTGC
	JW10342	AATGATACGGCGACCACCGAGATCTACACTCCAGGTATCGTCGGCAGCGTCAGATGTGTATAAGAGACAGCTATGACCATGATTACGCC
	JW10345	CAAGCAGAAGACGGCATACGAGATTAAGGCGAGTCTCGTGGGCTCGGAGATGTGTATAAGAGACAGACCATATGCGGTGTGAAATACCGCAC
	JW10346	CAAGCAGAAGACGGCATACGAGATCGTACTAGGTCTCGTGGGCTCGGAGATGTGTATAAGAGACAGACCATATGCGGTGTGAAATACCGCAC
	JW10347	CAAGCAGAAGACGGCATACGAGATAGGCAGAAGTCTCGTGGGCTCGGAGATGTGTATAAGAGACAGACCATATGCGGTGTGAAATACCGCAC
	KS1297	GACGTTGTAAAACGACGGCTTGACAAAATAAGGGTTTCG
	KS1298	CTATGACCATGATTACGCCAGATTCTAAGTTTGGAGTACGC
	KS1299	GTGTTCTTTGTAAAGATCTGCCTTTGCCATTGTTAGTGCTCC
	KS1300	GCAGATCTTTACAAAGAACACC
	KS1368	AGCACAGTAATAAACCCATATATTGC
	KS1369	ATATATGGGTTTATTACTGTGCTagTTAACAATATATTGGTGTCTTCCC
	KS1370	GACGTTGTAAAACGACGGCACGCTGAGATTAACAACCTGC
	KS1371	CTATGACCATGATTACGCCAGCAGATCTTTACAAAGAACACC
