# Supplementary material for: Transcription termination and antitermination of bacterial CRISPR arrays
Source: eLife journal article supplement (doi:10.7554/elife.58182), 2020-10-30
Supplement: supp [file elife_poa_e58182_Figure_6_figure_supplement_1.docx]

CAATATATGGGTTTATTACTGTGCTCTTTAACAATATATTGGTGTCTTCCCCACGCAGGTGGGGGTGTTTCTGATAAAACTTACGAATTGTTTATTAGCGATGGGTCTTCCCCACGCAGGTGGGGGTGTTTCTATAGAGGATCACCATAATATTAACGTAAAAATGTCTTCCCCACGCAGGTGGGGGTGTTTCCACTGACTCGCCAAGCTTCGCCACCGCTTCTAGGTCTTCCCCACGCAGGTGGGGGTGTTTCCACCGCTAATCATGGTGGAACGAACGCCATCAAGTCTTCCCCACGCAGGTGGGGGTGTTTCTGATTTTGGAAGTAATGGGAACTGAGCGTTAAGGTCTTCCCCACGCAGGTGGGGGTGTTTCCCAAAAACCTACGCGGTTTTAAATGGATTCGACGTCTTCCCCACGCAGGTGGGGGTGTTTCTATCTTGGTTTTGCAGGTTGTTAATCTCAGCGTGTCTTCCCCACGCAGGTGGGGGTGTTTCTGATTGGTTCCAGTTTATGACAAGAACCAACACGTCTTCCCCACGCAGGTGGGGGTGTTTCCGACTTTTGCATCATCGATGTACGGAACGCTAGGTCTTCCCCACGCAGGTGGGGGTGTTTCCACTGAGATTGCGTGTCGCCGACTTGCGCTTGCGTCTTCCCCACGCAGGTGGGGGTGTTTCTAGACTATCAATGTGCGCTTGCAAGTCTTTTAAGTCTTCCCCACGCAGGTGGGGGTGTTTCTTGATCGCTCTGAAATTGTGACTTGTTTTGTTAGTCTTCCCCACGCAGGTGGGGGTGTTTCTAGATCTTAATTGTTCGCGTTGAATGGGAAATTGTCTTCCCCACGCAGGTGGGGGTGTTTCCAGATTGTAGATAAGCAGGAGACTGCCCACCAGGTCTTCCCCACGCAGGTGGGGGTGTTTCCGCTTCTGTAGAGGTGATGGGTCCAAAGATGTTGTCTTCCCCACGCAGGTGGGGGTGTTTCTACATTCGTGATATCAGCGGATGCGCTTGGTCAGTCTTCCCCACGCAGGTGGGGGTGTTTCCAAGGAAATTTGCTACCAAAAGACGTGATCGAGGTCTTCCCCACGCAGGTGGGGGTGTTTCCCAAGCAGCAATAAAAATGGAGAGCAATCCTATGTCTTCCCCACGCAGGTGGGGGTGTTTCCCAAAGCAATTCAACAGAGGCCATCAATCGCCTGTCTTCCCCACGCAGGTGGGGGTGTTTCTATTGCATTGAATTGCCCCACTCTTTGACCACAGTCTTCCCCACGCAGGTGGGGGTGTTTCTCAAAATACTTCTCGCACATCCTGCAAGCGCTGGTCTTCCCCACGCAGGTGGGGGTGTTTCCCGAATACAACGGGCAAGCCTGCGCTAACGTTCGTCTTCCCCACGCAGGTGGGGGTGTTTCCGGTTGATAAAACGCTGCGTAAGTTTTTCGAAGGTCTTCCCCACGCAGGTGGGGGTGTTTCTAAAACTTCATAGATTGTTGCCTCCATTGTTTCGTCTTCCCCACGCAGGTGGGGGTGTTTCTACGTCAACGGACAAACCAAAACCGAATGGAAGGTCTTCCCCACGCAGGTGGGGGTGTTTCCACTGAGATTGCGTGTCGCCGACTTGCGCTTGCGTCTTCCCCACGCAGGTGGGGGTGTTTCTACTGGCCGATGAGGTGGACCGCTACGGCTTCAGTCTTCCCCACGCAGGTGGGGGTGTTTCTCACCCAGCACATTACCACCCATGATCAGCGTTGTCTTCCCCACGCAGGTGGGGGTGTTTCCGAGTGGGTTTAGGTTGTAGGTTGCACATACGCGTCTTCCCCACGCAGGTGGGGGTGTTTCTTCGAAAAGCTATTAGGCGGCATAACCACAGTTGTCTTCCCCACGCAGGTGGGGGTGTTTCCAACAAACCAGCCACTTTGCATTTTGTAGCAGAGTCTTCCCCACGCAGGTGGGGGTGTTTCTGGAAGTTATTTATATTGGACCTGATTGCACGGGTCTTCCCCACGCAGGTGGGGGTGTTTCTACTTTGGGCCTTGTTTTATGTGCCAGTGCCCGGTCTTCCCCACGCAGGTGGGGGTGTTTCCCACTATTTCAATAATCGGCGTAGCTCCGACTGGTCTTCCCCACGCAGGTGGGGGTGTTTCCGTAATCTTCTTTGTCTGAGTAATCCAAAATACGTCTTCCCCACGCAGGTGGGGGTGTTTCTCATGGCAGCGATATTTGTTTTACCCTTCATACGTCTTCCCCACGCAGGTGGGGGTGTTTCCATCTGGAACGCACTCAAGCGGCAATCCGAAGTGTCTTCCCCACGCAGGTGGGGGTGTTTCTACGTCCAGCATTACCGCCGCGCCGTGTCGAGTGTCTTCCCCACGCAGGTGGGGGTGTTTCTCCTCCCTGCTCATATGCCGTTAAAACTTTCTCGTCTTCCCCACGCAGGTGGGGGTGTTTCT

Spacer 1 GATAAAACTTACGAATTGTTTATTAGCGATGG

Spacer 2 ATAGAGGATCACCATAATATTAACGTAAAAAT

Spacer 3 ACTGACTCGCCAAGCTTCGCCACCGCTTCTAG

Spacer 4 ACCGCTAATCATGGTGGAACGAACGCCATCAA

Spacer 5 GATTTTGGAAGTAATGGGAACTGAGCGTTAAG

Spacer 6 CAAAAACCTACGCGGTTTTAAATGGATTCGAC

Spacer 7 ATCTTGGTTTTGCAGGTTGTTAATCTCAGCGT

Spacer 8 GATTGGTTCCAGTTTATGACAAGAACCAACAC

Spacer 9 GACTTTTGCATCATCGATGTACGGAACGCTAG

Spacer 10 ACTGAGATTGCGTGTCGCCGACTTGCGCTTGC

Spacer 11 AGACTATCAATGTGCGCTTGCAAGTCTTTTAA

Spacer 12 TGATCGCTCTGAAATTGTGACTTGTTTTGTTA

Spacer 13 AGATCTTAATTGTTCGCGTTGAATGGGAAATT

Spacer 14 AGATTGTAGATAAGCAGGAGACTGCCCACCAG

Spacer 15 GCTTCTGTAGAGGTGATGGGTCCAAAGATGTT

Spacer 16 ACATTCGTGATATCAGCGGATGCGCTTGGTCA

Spacer 17 AAGGAAATTTGCTACCAAAAGACGTGATCGAG

Spacer 18 CAAGCAGCAATAAAAATGGAGAGCAATCCTAT

Spacer 19 CAAAGCAATTCAACAGAGGCCATCAATCGCCT

Spacer 20 ATTGCATTGAATTGCCCCACTCTTTGACCACA

Spacer 21 CAAAATACTTCTCGCACATCCTGCAAGCGCTG

Spacer 22 CGAATACAACGGGCAAGCCTGCGCTAACGTTC

Spacer 23 GGTTGATAAAACGCTGCGTAAGTTTTTCGAAG

Spacer 24 AAAACTTCATAGATTGTTGCCTCCATTGTTTC

Spacer 25 ACGTCAACGGACAAACCAAAACCGAATGGAAG

Spacer 26 ACTGAGATTGCGTGTCGCCGACTTGCGCTTGC

Spacer 27 ACTGGCCGATGAGGTGGACCGCTACGGCTTCA

Spacer 28 CACCCAGCACATTACCACCCATGATCAGCGTT

Spacer 29 GAGTGGGTTTAGGTTGTAGGTTGCACATACGC

Spacer 30 TCGAAAAGCTATTAGGCGGCATAACCACAGTT

Spacer 31 AACAAACCAGCCACTTTGCATTTTGTAGCAGA

Spacer 32 GGAAGTTATTTATATTGGACCTGATTGCACGG

Spacer 33 ACTTTGGGCCTTGTTTTATGTGCCAGTGCCCG

Spacer 34 CACTATTTCAATAATCGGCGTAGCTCCGACTG

Spacer 35 GTAATCTTCTTTGTCTGAGTAATCCAAAATAC

Spacer 36 CATGGCAGCGATATTTGTTTTACCCTTCATAC

Spacer 37 ATCTGGAACGCACTCAAGCGGCAATCCGAAGT

Spacer 38 ACGTCCAGCATTACCGCCGCGCCGTGTCGAGT

Spacer 39 CCTCCCTGCTCATATGCCGTTAAAACTTTCTC
