# Supplementary figures and images for: Transcription termination and antitermination of bacterial CRISPR arrays
Source: eLife journal article supplement (doi:10.7554/elife.58182), 2020-10-30

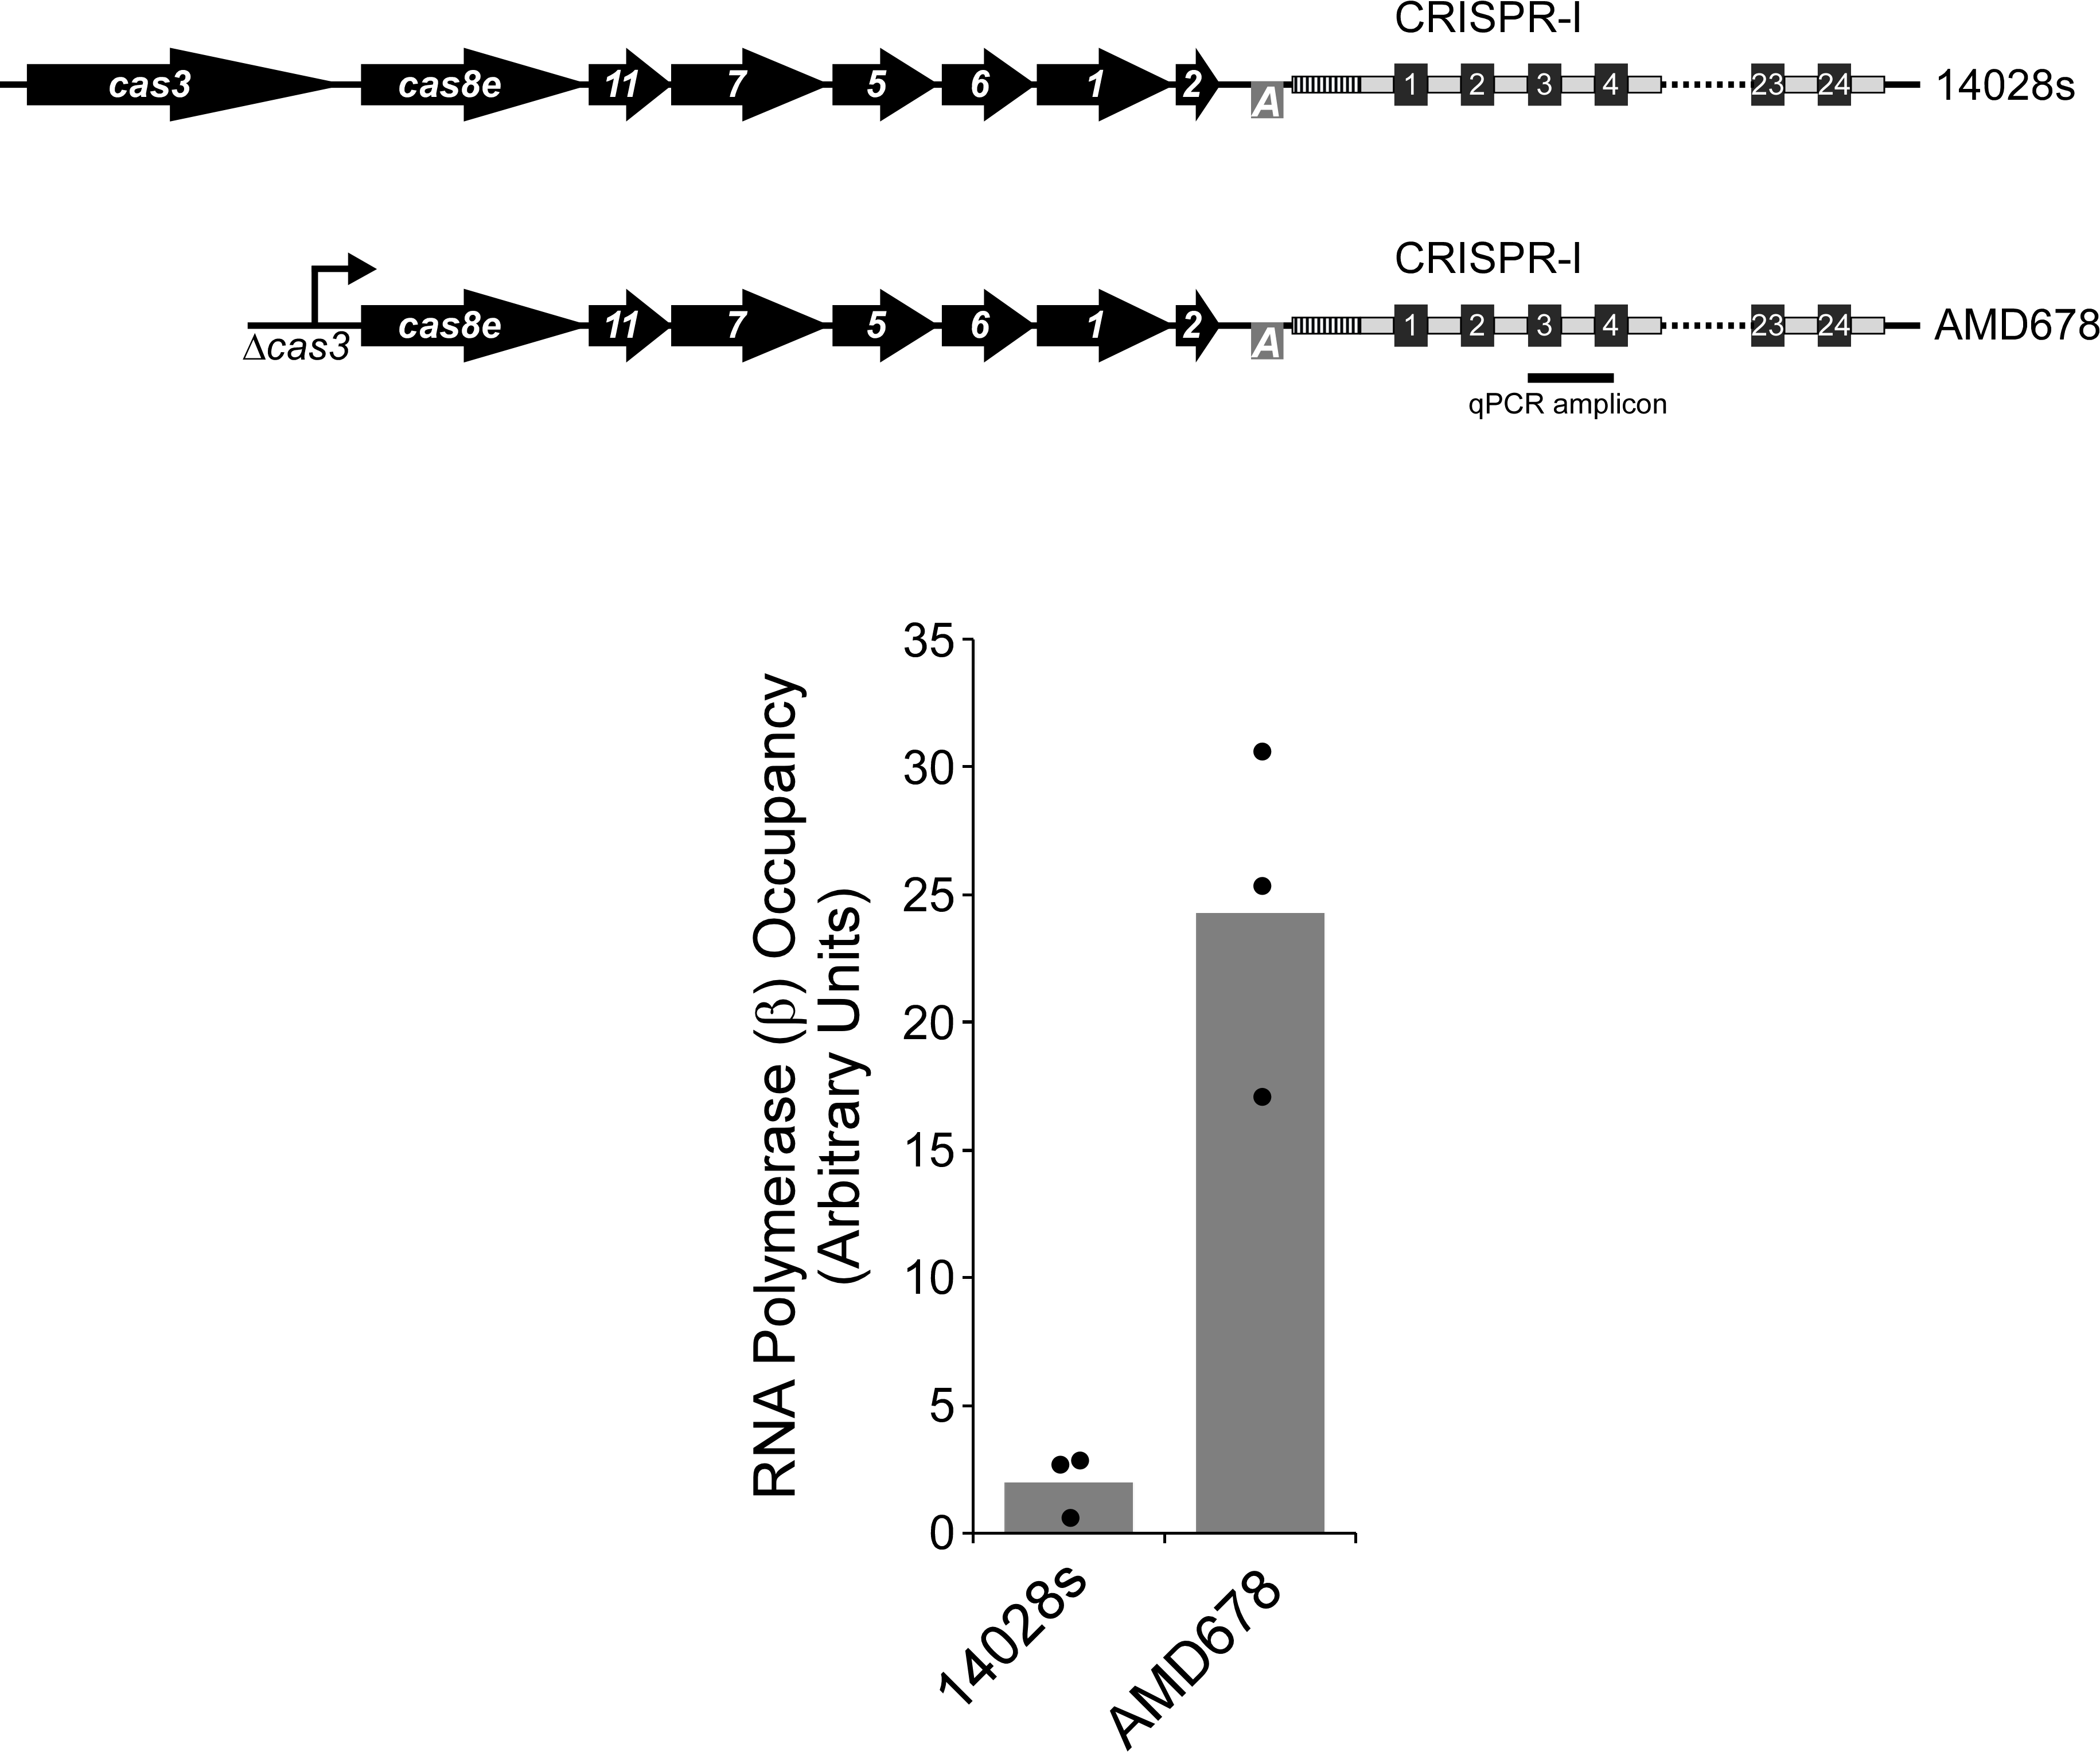

Supplement: supp [file elife-58182-supp-v1.zip › elife_poa_e58182_Figure_1_figure_supplement_1.tif]

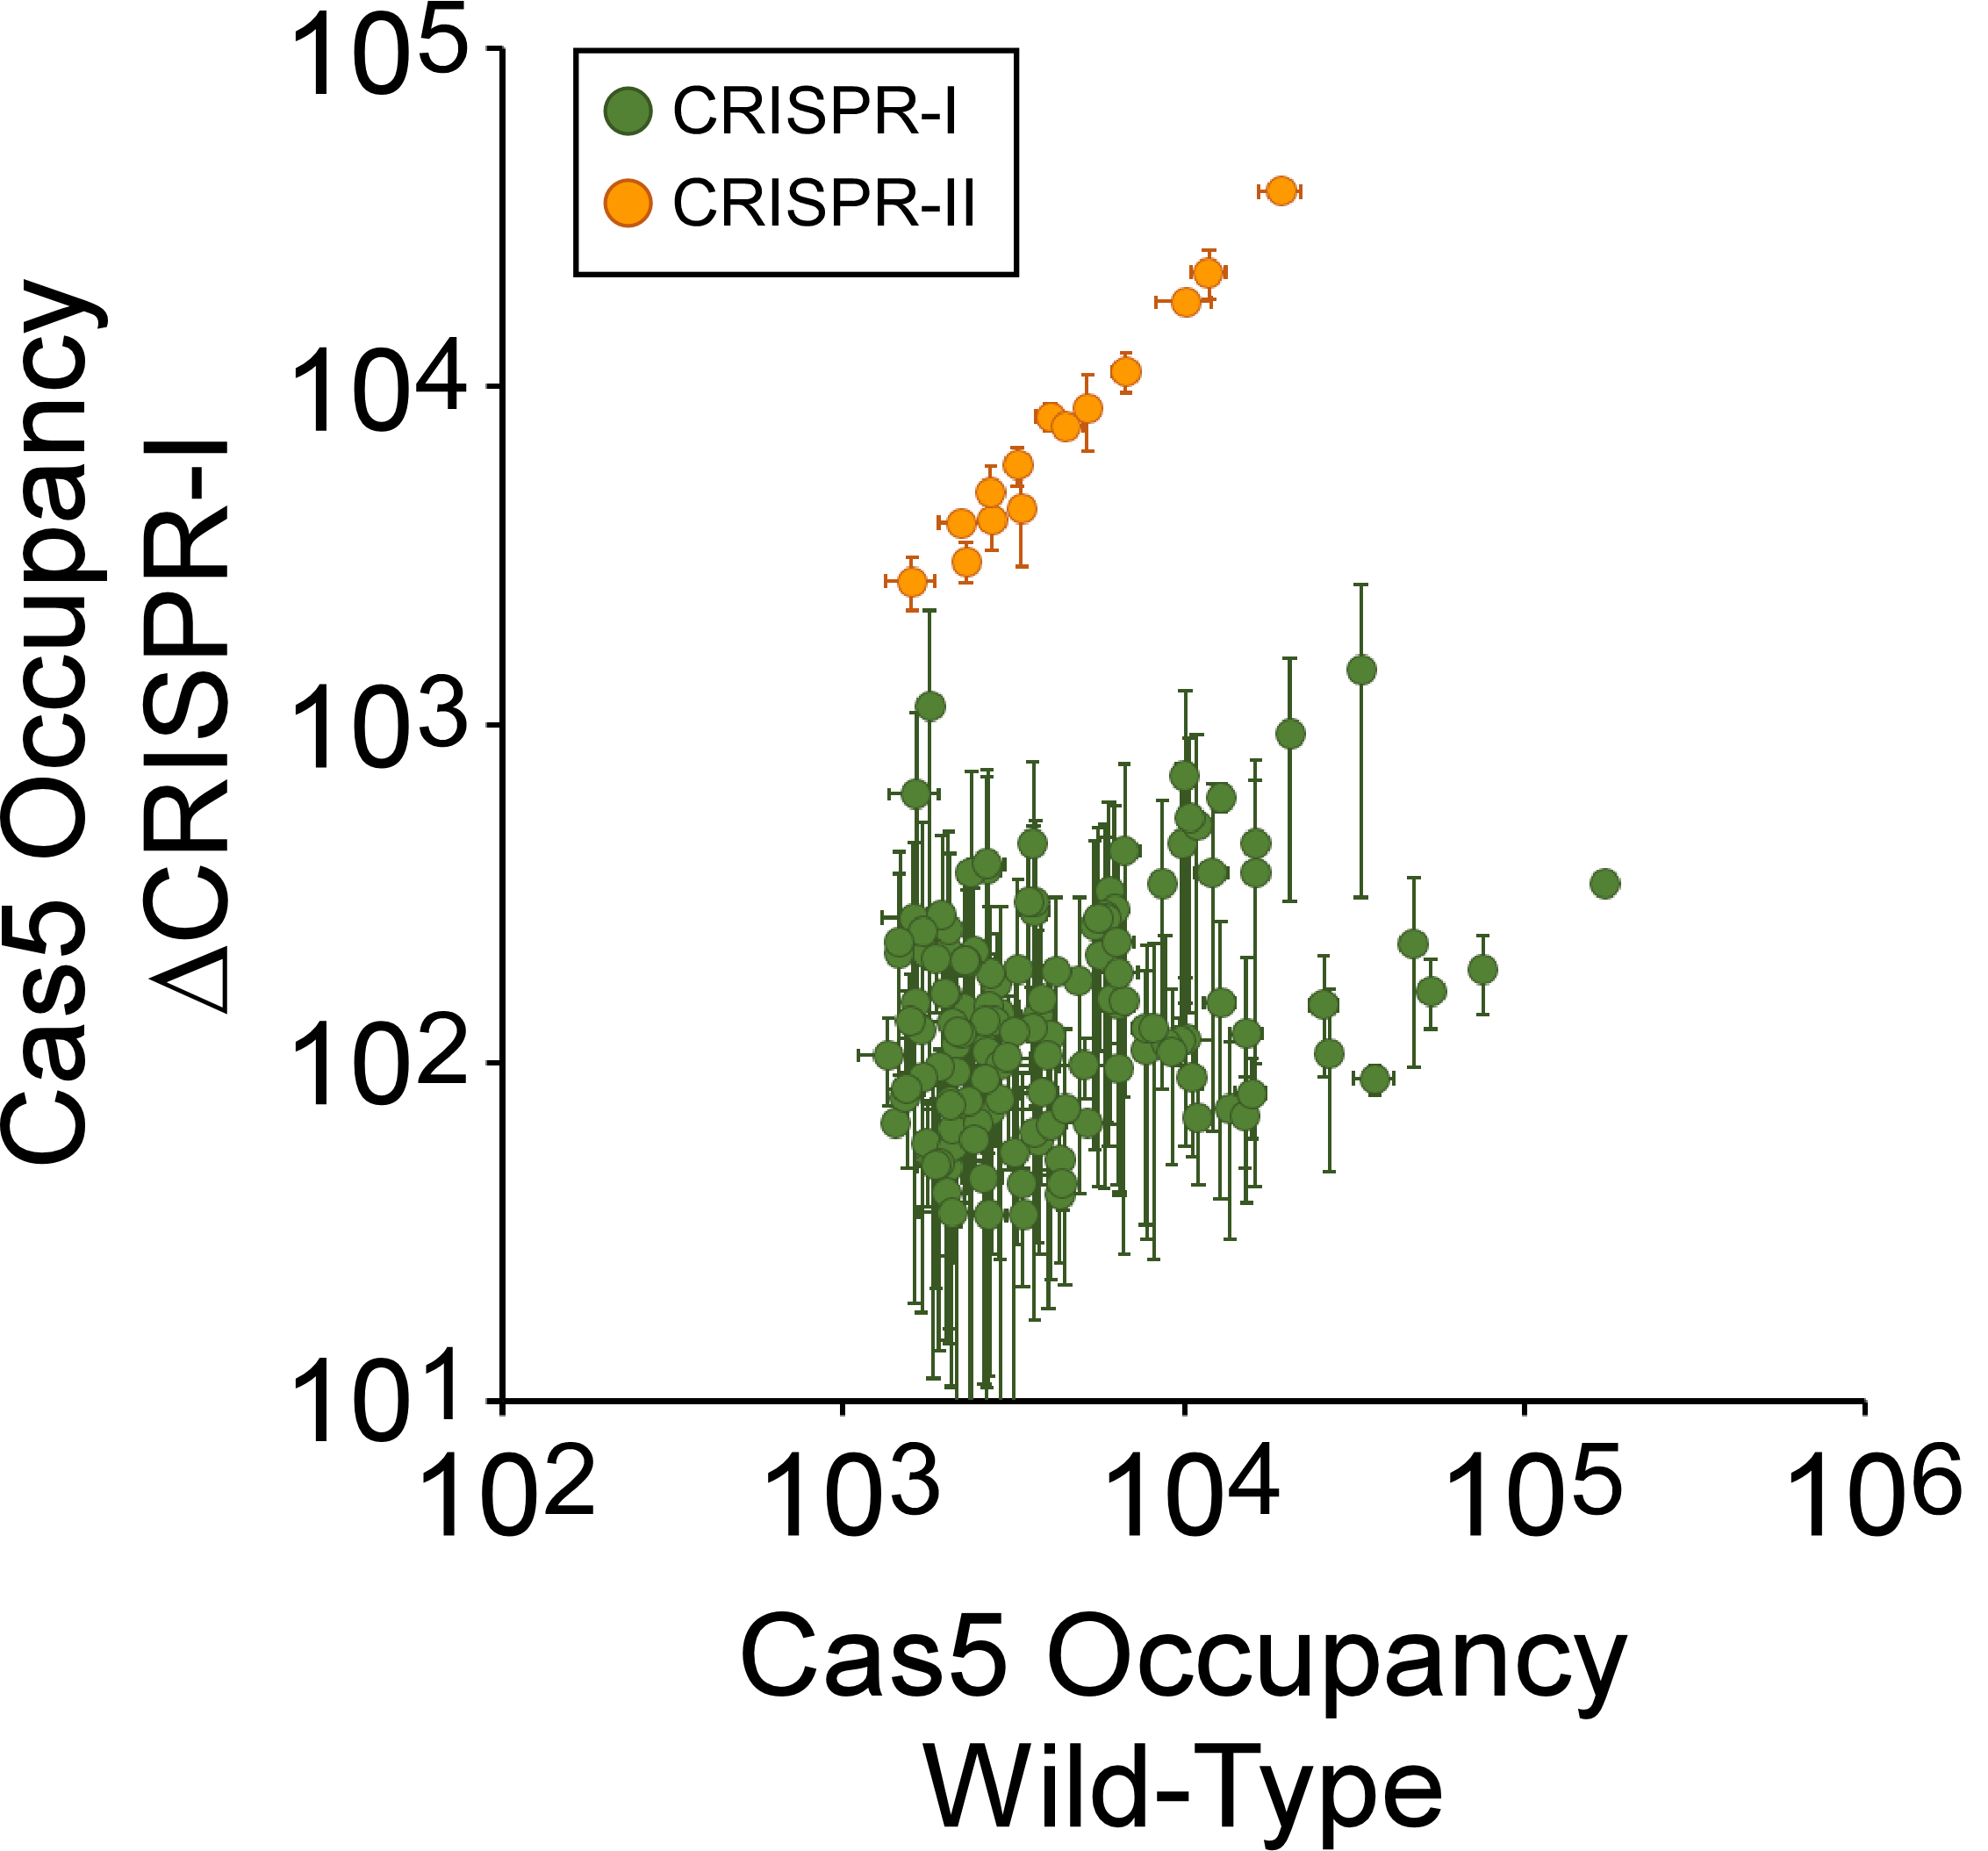

Supplement: supp [file elife-58182-supp-v1.zip › elife_poa_e58182_Figure_3_figure_supplement_1.tif]

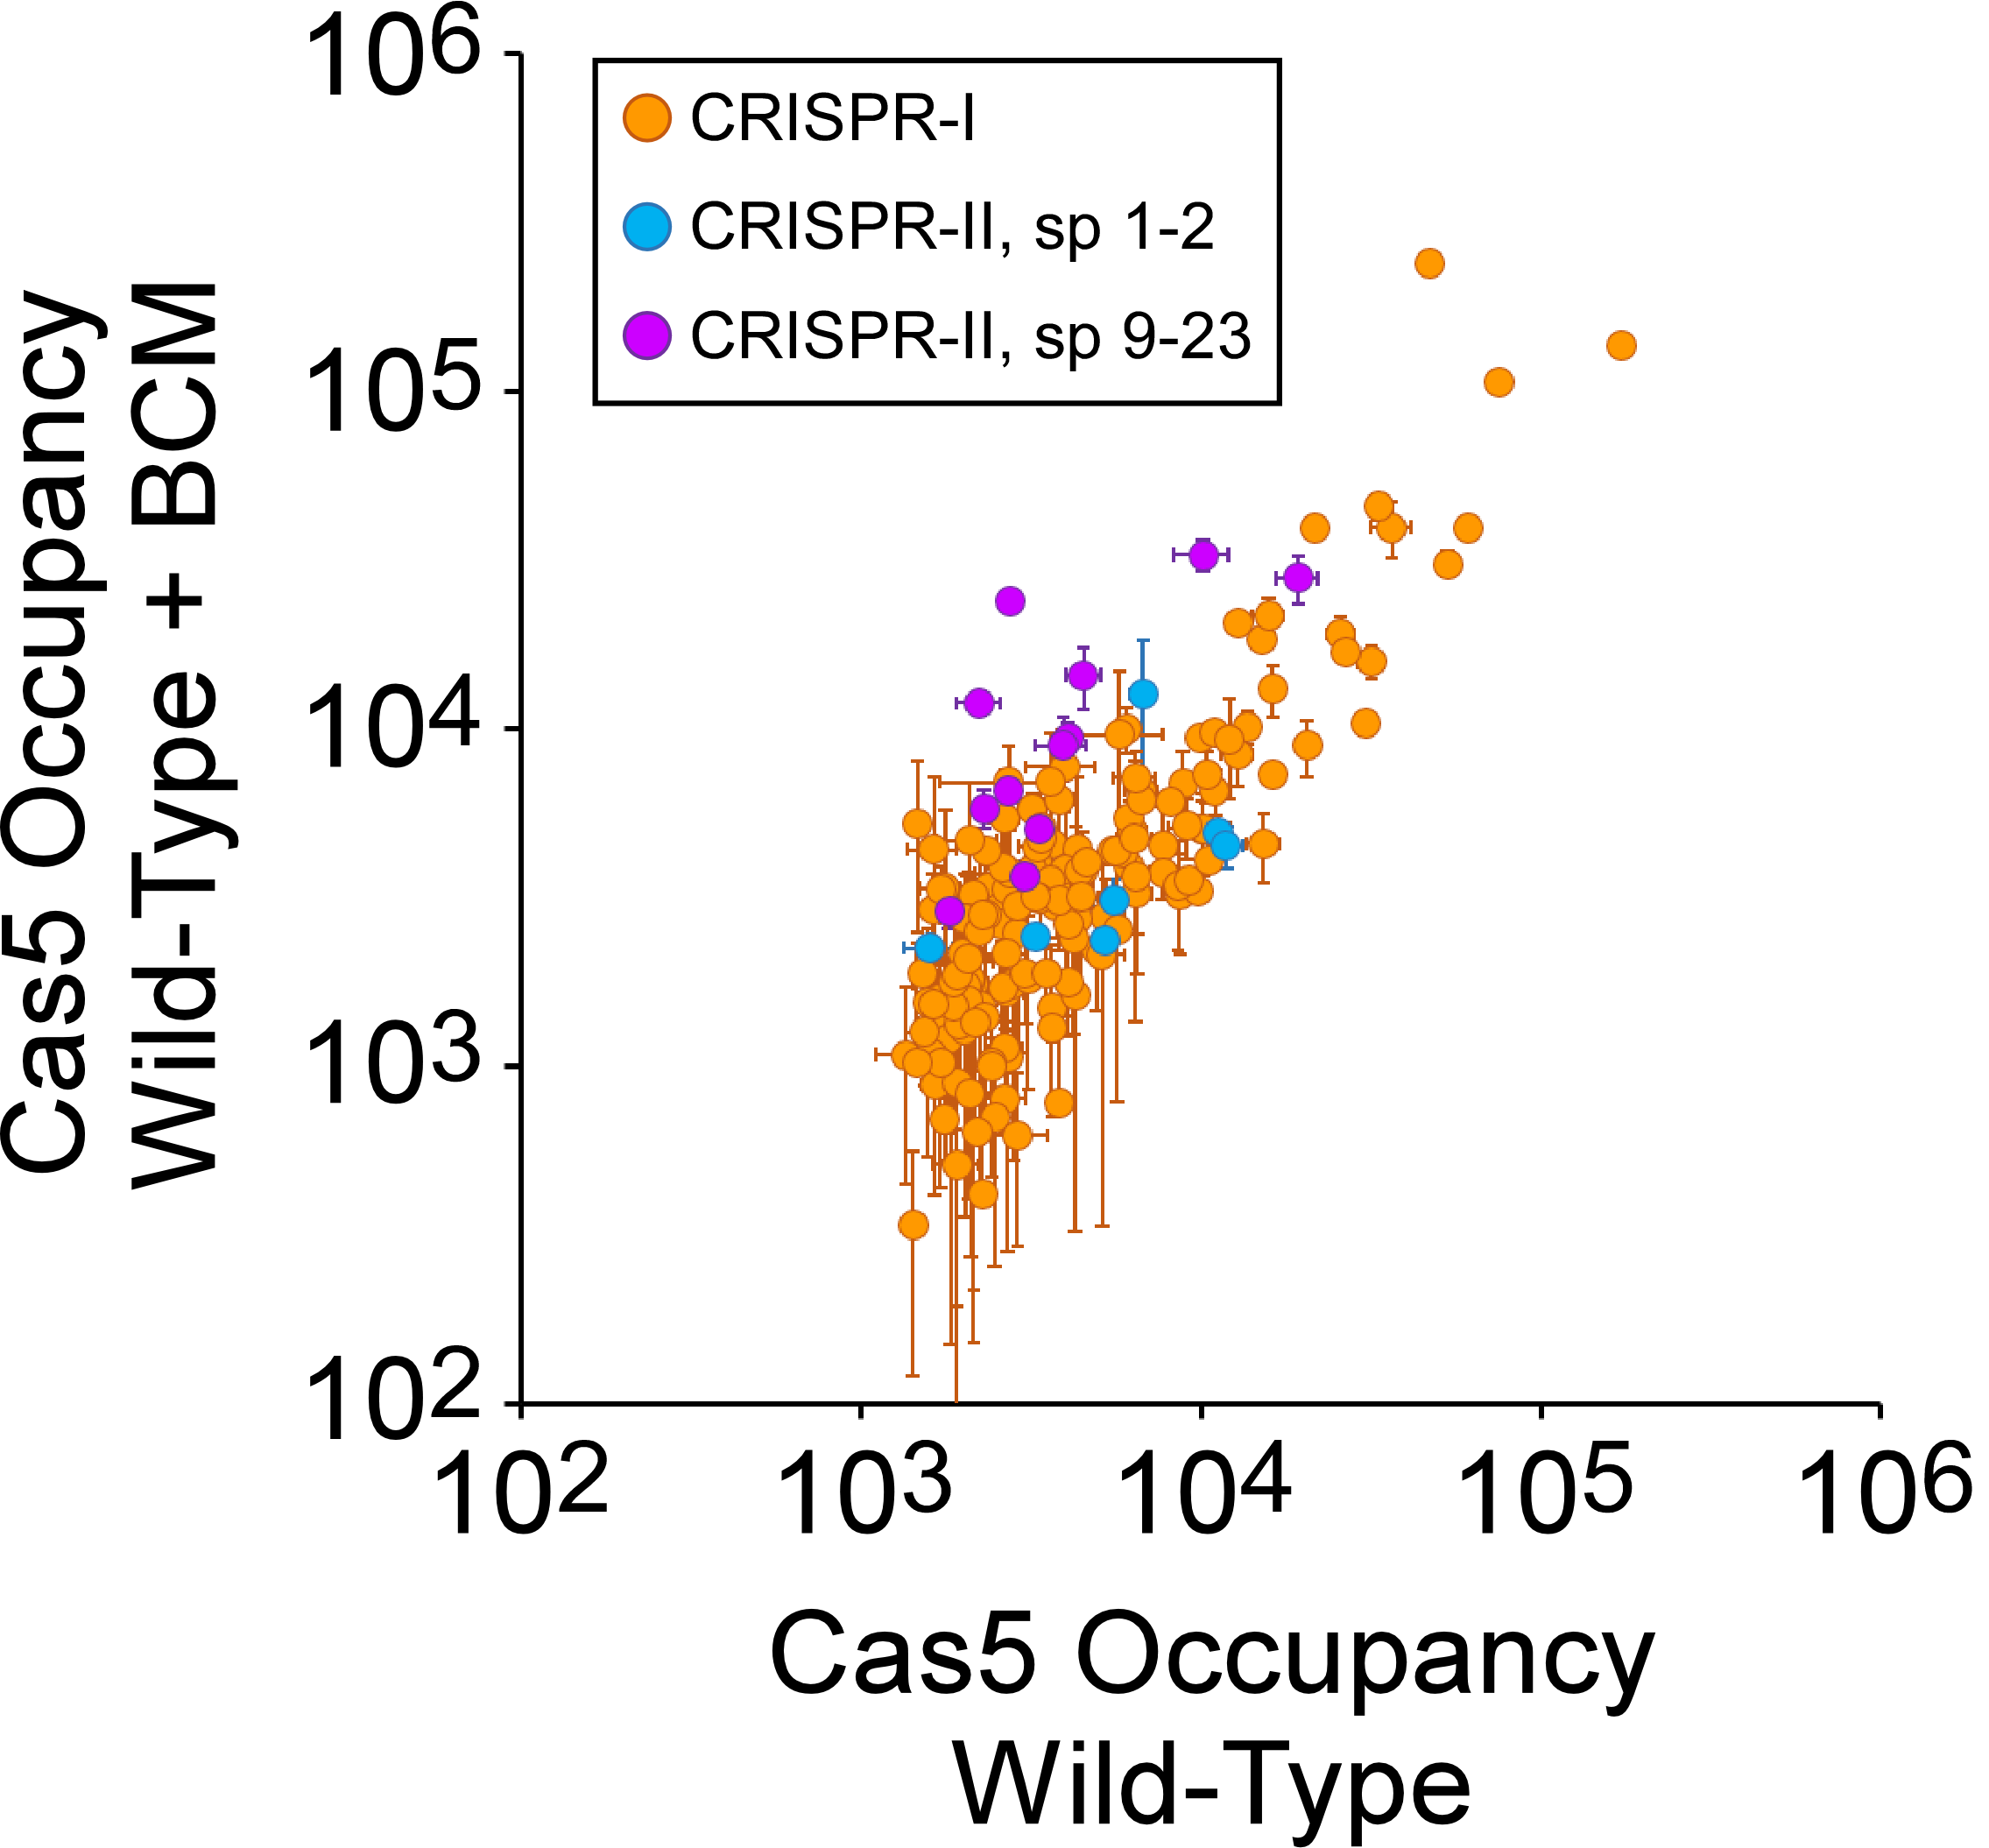

Supplement: supp [file elife-58182-supp-v1.zip › elife_poa_e58182_Figure_4_figure_supplement_1.tif]

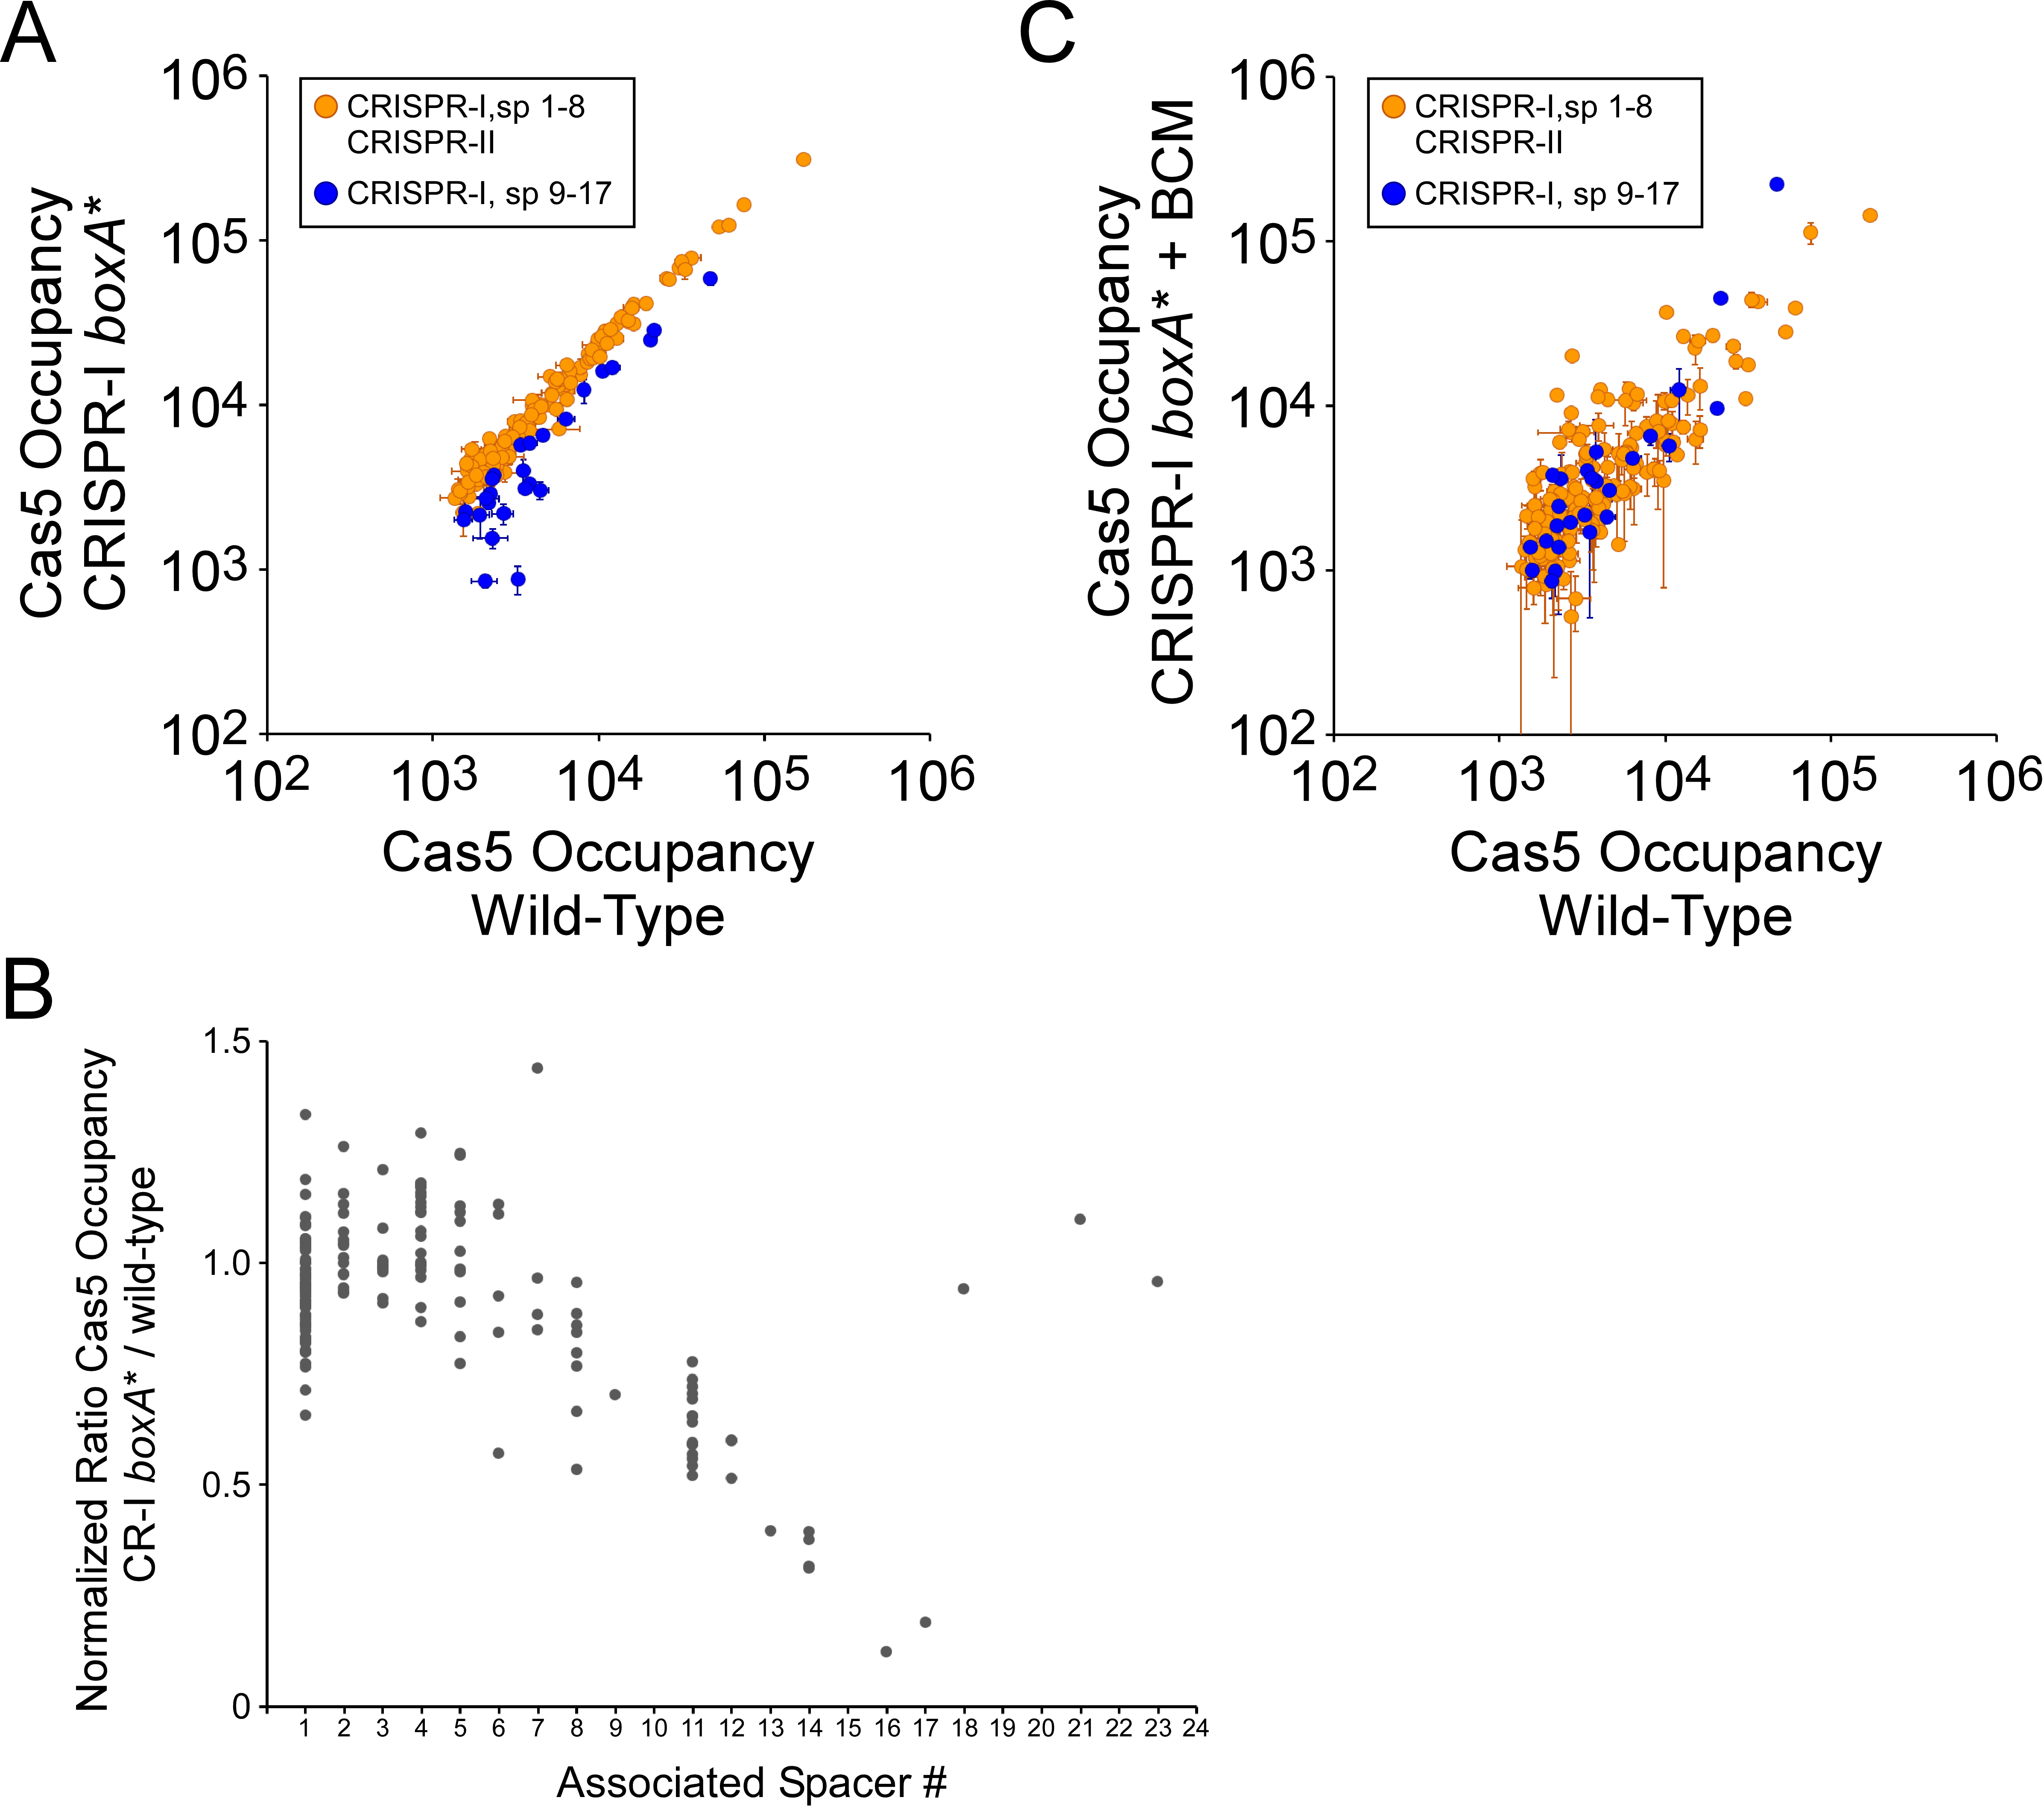

Supplement: supp [file elife-58182-supp-v1.zip › elife_poa_e58182_Figure_4_figure_supplement_2.tif]

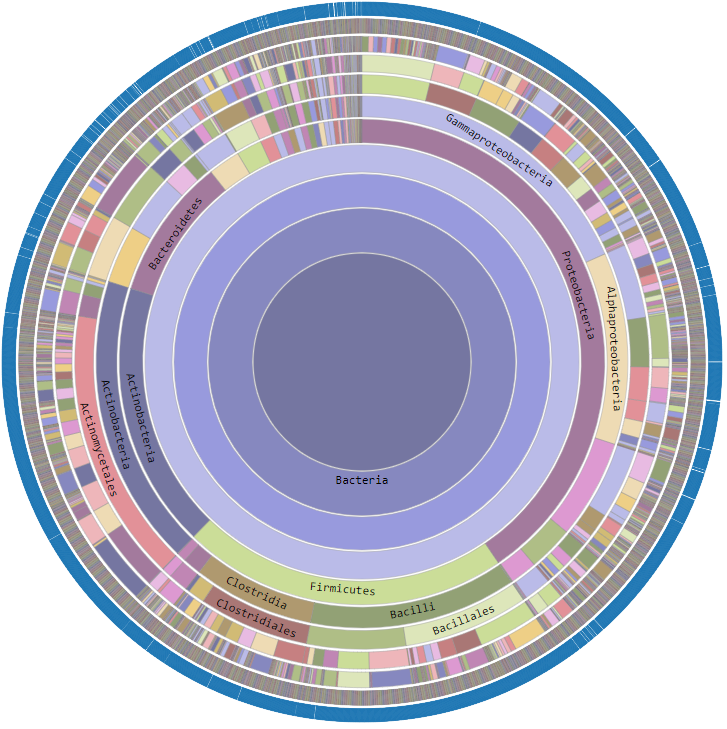

Supplement: supp [file elife-58182-supp-v1.zip › elife_poa_e58182_Figure_7_figure_supplement_1.tif]

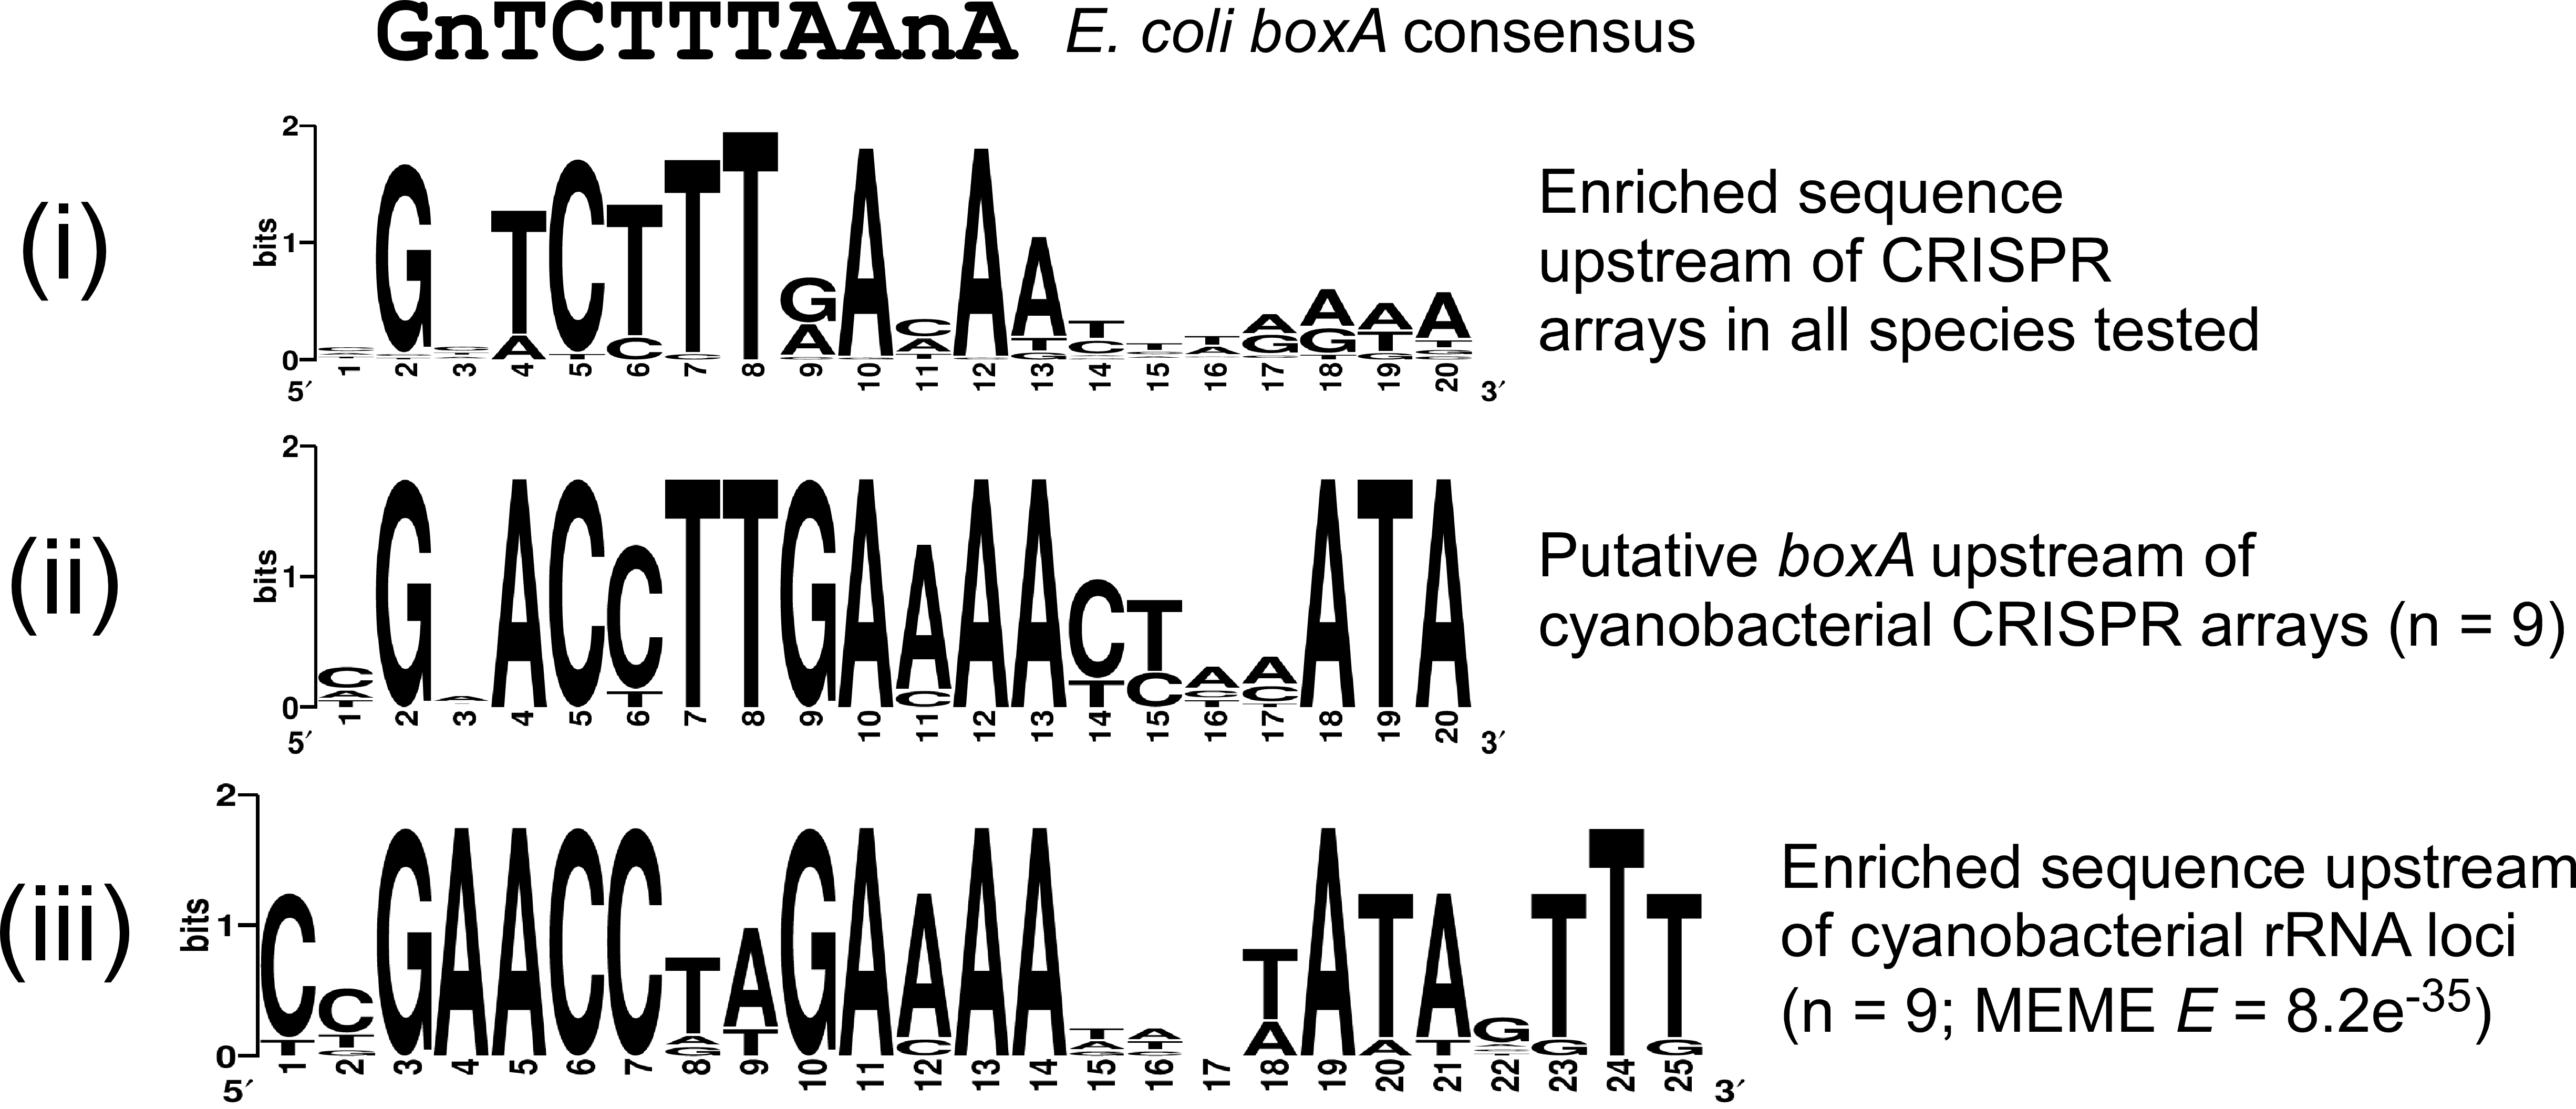

Supplement: supp [file elife-58182-supp-v1.zip › elife_poa_e58182_Figure_7_figure_supplement_2.tif]
